# Supplementary material for: Chromosome-Level Assembly and Comparative Genomic Analysis of Suillus bovinus Provides Insights into the Mechanism of Mycorrhizal Symbiosis
Source: MDPI journal article supplement (doi:10.3390/jof10030211), 2024-03-13

SESQUITERPENOID AND TRITERPENOID BIOSYNTHESIS

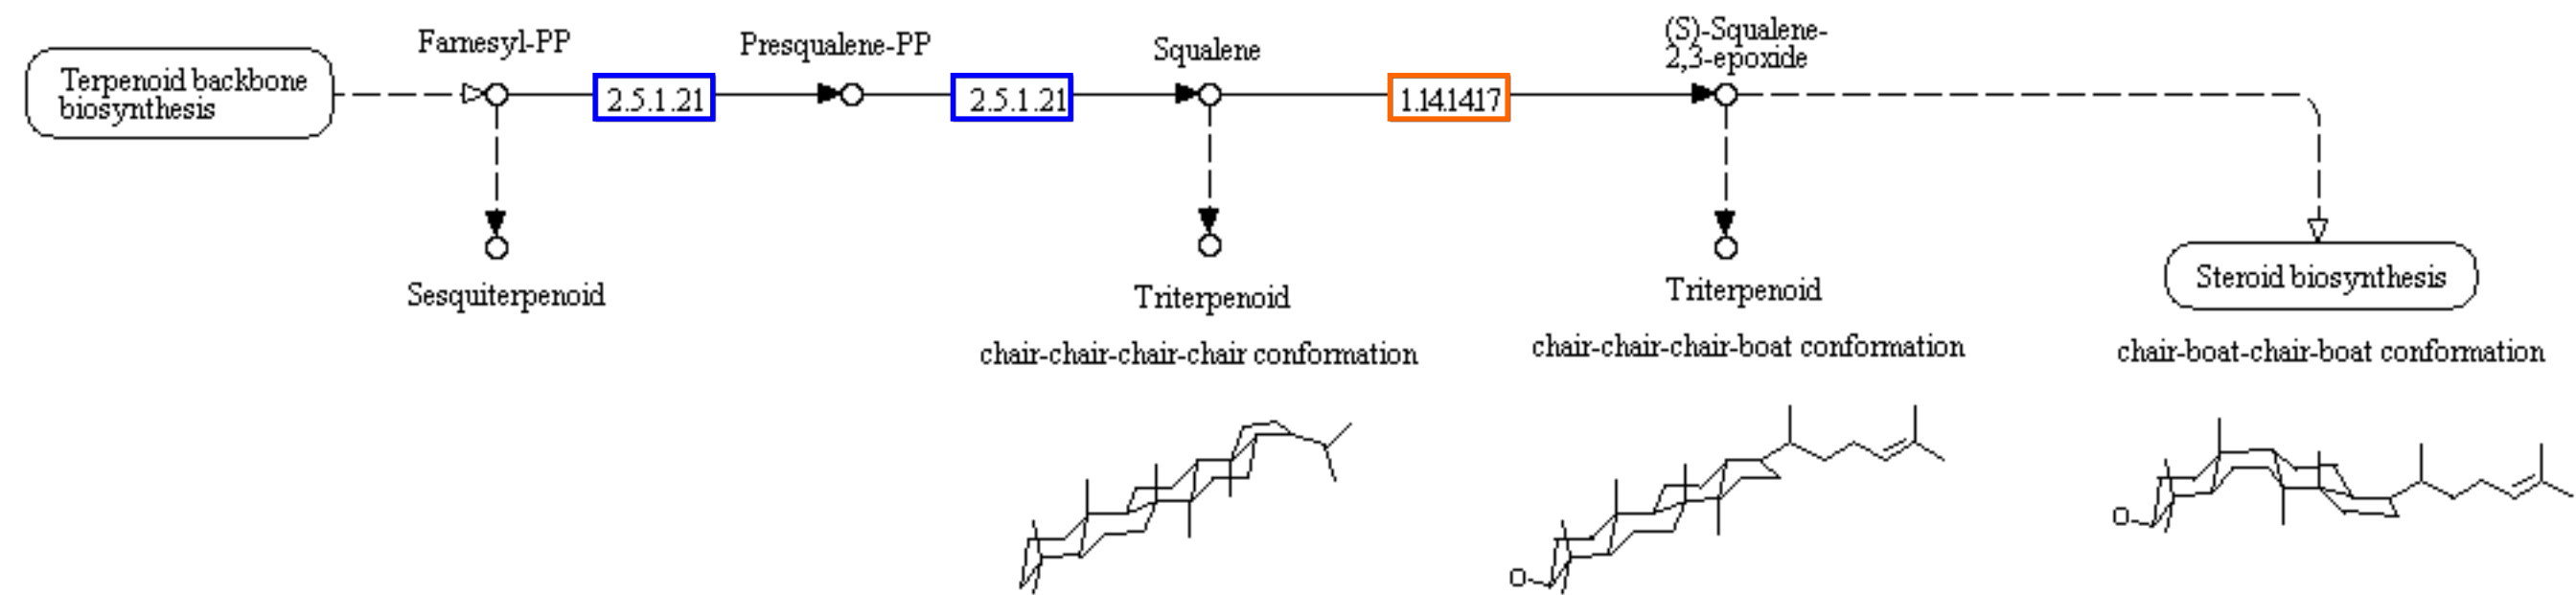

Sesquiterpenoid

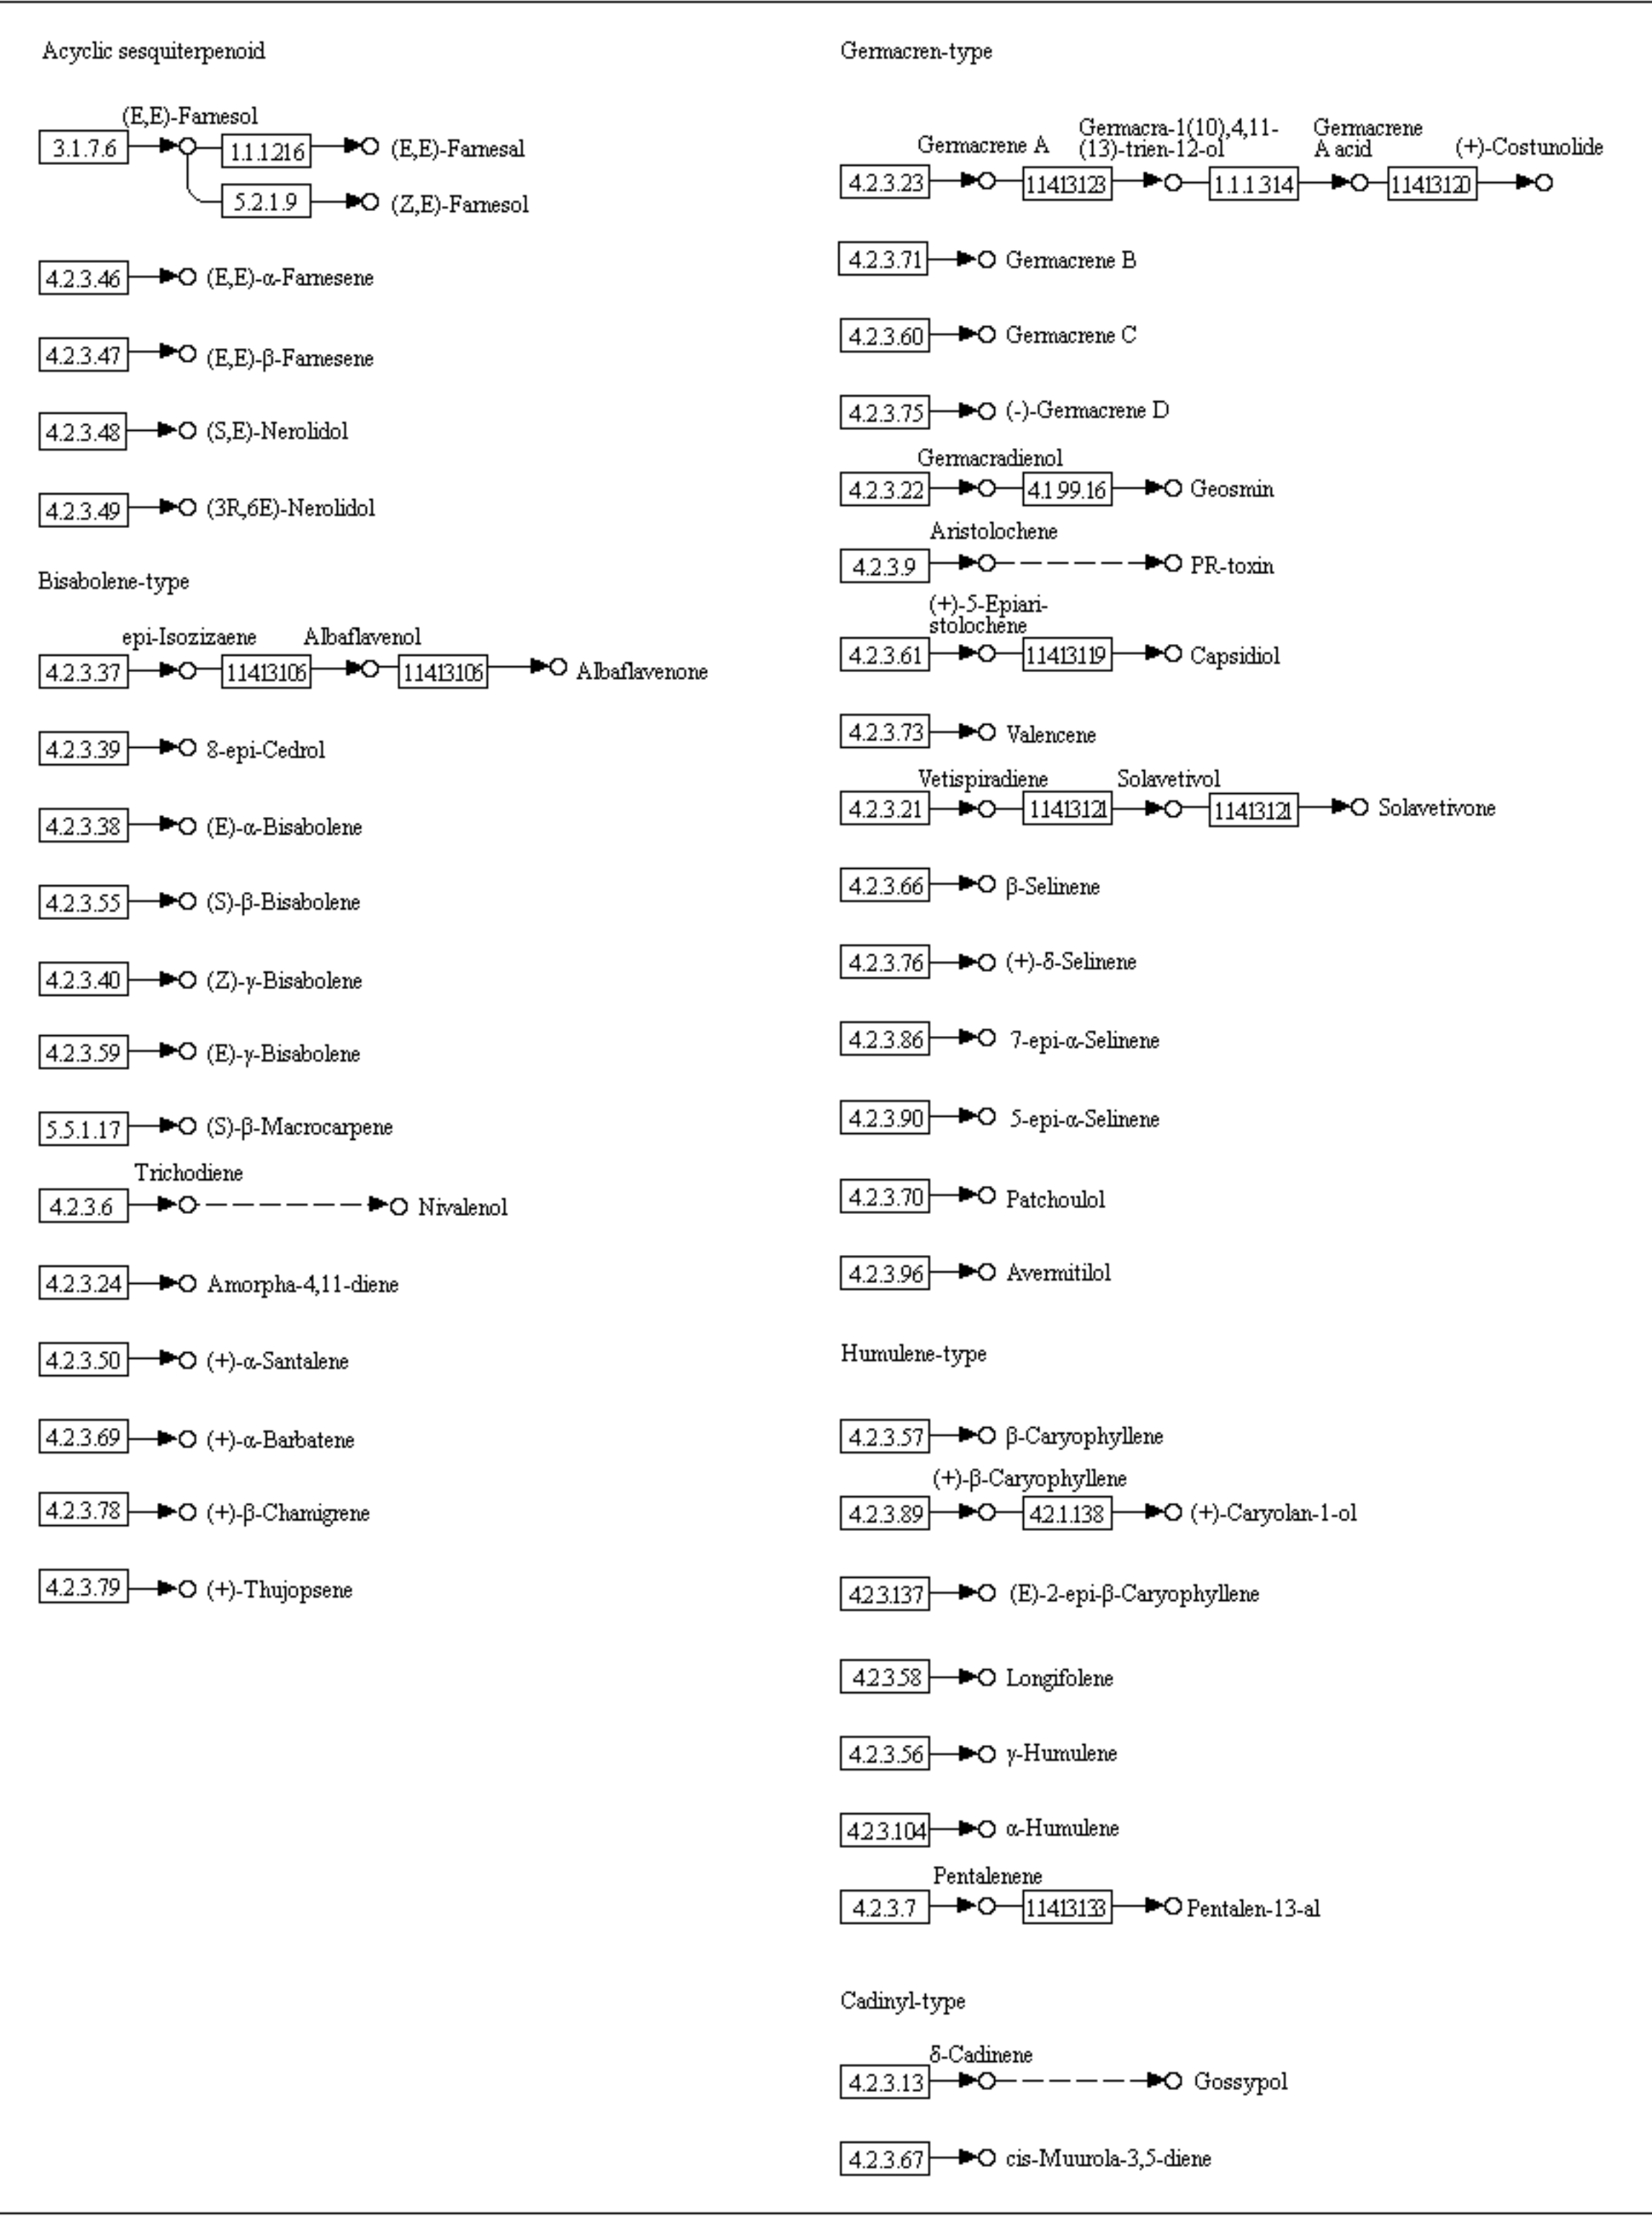

Triterpenoid chair-chair-chair-chair conformation

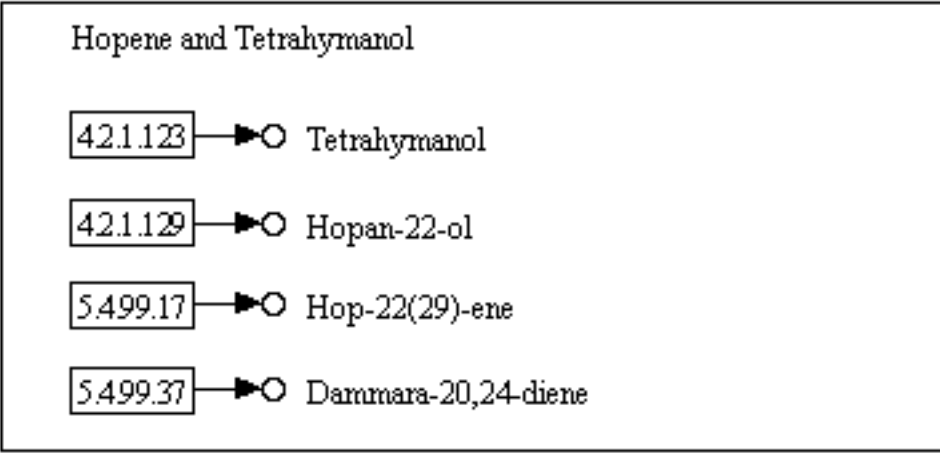

Triterpenoid chair-chair-chair-boat conformation

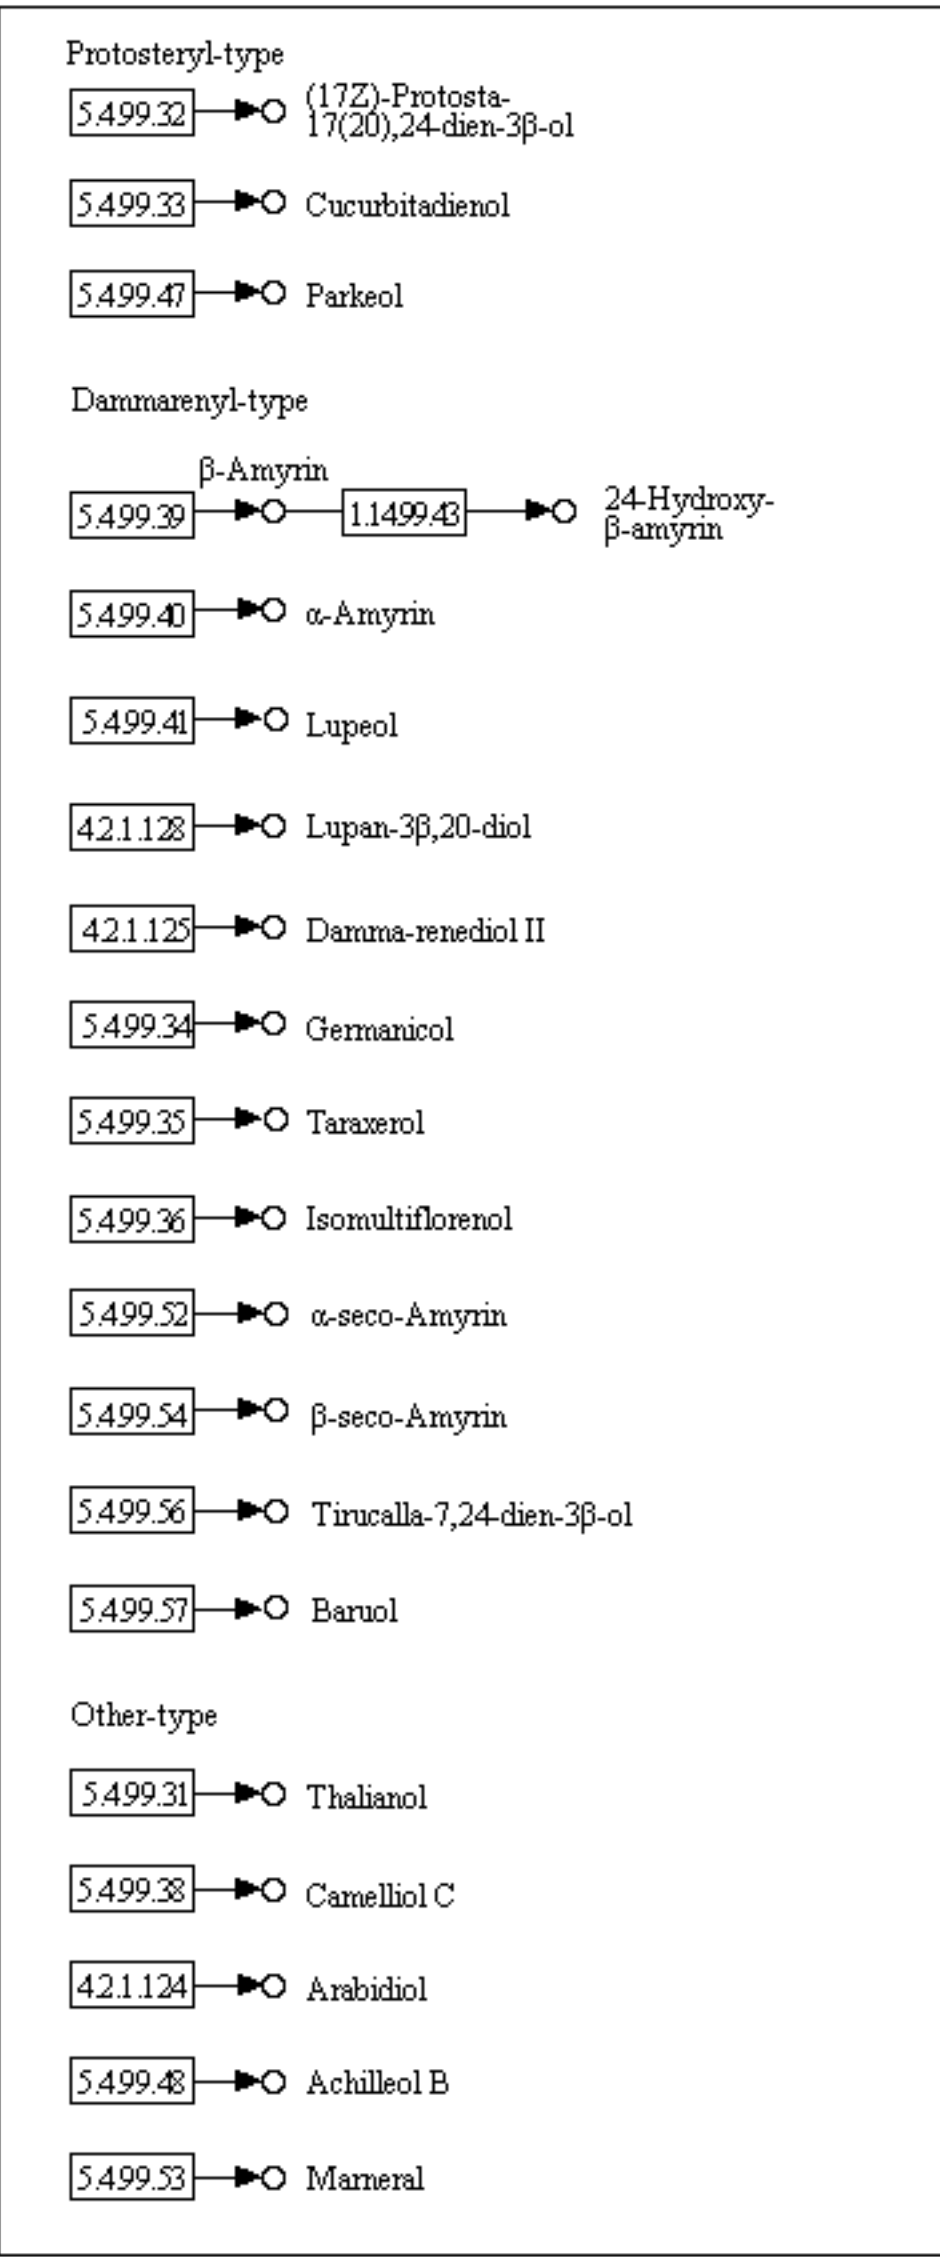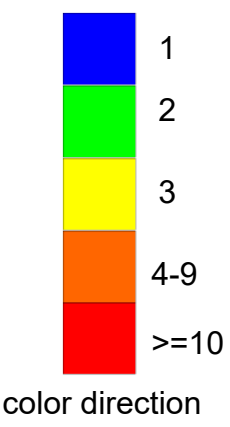

Supplement: s1 [file s1]
