# Supplementary material for: Chromosome-Level Assembly and Comparative Genomic Analysis of Suillus bovinus Provides Insights into the Mechanism of Mycorrhizal Symbiosis
Source: J Fungi (Basel). 2024 Mar 13;10(3):211. doi: 10.3390/jof10030211 (PMC10971629; doi:10.3390/jof10030211)
Supplement: Supplementary file 1 [file jof-10-00211-s001.zip]

Archive with 7 entries (7 files):
- Figure S2.svg
- Figure S3.pdf
- Figure S4.pdf
- Figure S5.pdf
- Supplemental Materials.pdf
- Supplemental Materials.xlsx
- Figure S1.pdf
