# Supplementary material for: Chromosome-Level Assembly and Comparative Genomic Analysis of Suillus bovinus Provides Insights into the Mechanism of Mycorrhizal Symbiosis
Source: J Fungi (Basel). 2024 Mar 13;10(3):211. doi: 10.3390/jof10030211 (PMC10971629; doi:10.3390/jof10030211)
Supplement: Supplementary file 1 [file jof-10-00211-s001.zip › Supplemental Materials.xlsx]

## Sheet: S1
Table S1. Fungi and the origin of their genomes used in the study.
class	order	family	name	Type of nutrition	BioProjects
Agaricomycetes	Polyporales	Polyporaceae	Trametes versicolor	Saprophytic	PRJNA242547
		Laetiporaceae	Laetiporus sulphureus	Saprophytic	PRJNA196057
	Agaricales	Agaricaceae	Agaricus bisporus	Saprophytic	PRJNA61005
		Pleurotaceae	Pleurotus ostreatus	Saprophytic	PRJNA670761
		Schizophyllaceae	Schizophyllum commune	Saprophytic	PRJNA51487
		Hydnangiaceae	Laccaria bicolor	Symbiotic	PRJNA29019
	Boletales	Sclerodermataceae	Pisolithus tinctorius	Symbiotic	PRJNA207840
		Paxillaceae	Paxillus involutus	Symbiotic	PRJNA60449
		Rhizopogonaceae	Rhizopogon vinicolor	Symbiotic	PRJNA196085
		Suillaceae	Suillus brevipes	Symbiotic	PRJNA218802
		Suillaceae	Suillus luteus	Symbiotic	PRJNA242126
		Suillaceae	Suillus bovinus	Symbiotic	This paper
	Russulales	Russulaceae	Lactarius deliciosus	Symbiotic	PRJNA500114
		Stereaceae	Stereum hirsutum	Saprophytic	PRJNA225528
Pezizomycetes	Pezizales	Tuberaceae	Tuber melanosporum	Symbiotic	PRJNA49017

## Sheet: S2
Table S2. Statistics of the sequencing data of the S. bovinus.
Library types	Platform	Insert size	Raw Data (Gb)
SMRT Bell	PacBio Sequel II	>20 kb	8.16
Short-read	Illumina NovaSeq 6000	350bp	2.69
Hi-C	Illumina NovaSeq 6000	350 bp	5.84
		1

## Sheet: S3
Table S3. BUSCO assessment results of S. bovinus.
BUSCO type	Count	Ratio(%)
Complete BUSCOs （C）	278	95.9
Complete and single-copy BUSCOs (S)	274	94.5
Complete and duplicated BUSCOs (D)	4	1.4
Fragmented BUSCOs (F)	1	0.3
Missing BUSCOs (M)	11	3.8
Total BUSCO groups searched	290	100

## Sheet: S4
Table S4. Summarizes of the annotations of S. bovinus.
Database	Number of genes with annotation	In Genome(%)
NR	10793	96.3747
KEGG	7290	65.0951
GO	6545	58.4427
Pfam	6545	58.4427
SwissProt	2140	19.1088
KOG	1640	14.6442
PHI	775	6.92026
Secretory_Protein	397	3.54496
TCDB	363	3.24136
CAZy	320	2.8574
DFVF	272	2.42879
P450	144	1.28583
Gene_id	Locus	{NR}	{SwissProt}	{KEGG}	{KOG}	{TCDB}	{GO}	{PHI}	{DFVF}	{P450}	{Secretory_Protein}	{CAZy}	{Pfam}
Annotation_num		10793	2140	7290	1640	363	6545	775	272	144	397	320	6545
A00001	{Contig10:1:472:-}	{CAA7270452.1; unnamed protein product [Agrocybe aegerita]}	{NA}	{mrr:Moror_3397; }	{NA}	{NA}	{NA}	{NA}	{NA}	{NA}	{NA}	{NA}	{NA}
A00002	{Contig10:48075:53870:-}	{KAG2128356.1; hypothetical protein EDB93DRAFT_1256700 [Suillus bovinus]}	{NA}	{NA}	{NA}	{NA}	{NA}	{NA}	{NA}	{NA}	{NA}	{NA}	{NA}
A00003	{Contig10:442112:443582:-}	{KAG2134872.1; hypothetical protein EDB93DRAFT_1107206 [Suillus bovinus]}	{NA}	{NA}	{NA}	{NA}	{NA}	{NA}	{NA}	{NA}	{NA}	{NA}	{NA}
A00004	{Contig10:3452207:3453077:-}	{KAG2155095.1; Phospholipase/Carboxylesterase-domain-containing protein [Suillus bovinus]}	{P0CL95; Acyl-protein thioesterase 1 }	{sla:SERLADRAFT_414252; }	{SPAC8E11.04c; KOG2112 Lysophospholipase I Lipid transport and metabolism ;}	{NA}	{GO:0008152; NA GO:0016787; hydrolase activity; molecular_function}	{NA}	{NA}	{NA}	{NA}	{NA}	{PF02230:Phospholipase/Carboxylesterase PF07859:alpha/beta hydrolase fold PF01083:Cutinase}
A00005	{Contig10:3453380:3454682:+}	{KAG2155096.1; guanine-1-methyltransferase-domain-containing protein [Suillus bovinus]}	{Q6FQB2; tRNA (guanine(9)-N1)-methyltransferase }	{sla:SERLADRAFT_462631; K15445 TRMT10, TRM10, RG9MTD tRNA (guanine9-N1)-methyltransferase 2.1.1.221 }	{SPAC6B12.09; KOG2967 Uncharacterized conserved protein S Function unknown ;}	{NA}	{GO:0006351; transcription, DNA-dependent; biological_process GO:0005515; protein binding; molecular_function GO:0003887; DNA-directed DNA polymerase activity; molecular_function GO:0003677; DNA binding; molecular_function}	{NA}	{NA}	{NA}	{NA}	{NA}	{PF01344:Kelch motif PF04931:DNA polymerase phi}
A00006	{Contig10:3455487:3457675:+}	{OJA08004.1; hypothetical protein AZE42_01095 [Rhizopogon vesiculosus]}	{P0CL95; Acyl-protein thioesterase 1 }	{sla:SERLADRAFT_414252; }	{NA}	{NA}	{GO:0016042; lipid catabolic process; biological_process GO:0004806; triglyceride lipase activity; molecular_function GO:0016787; hydrolase activity; molecular_function GO:0006629; lipid metabolic process; biological_process GO:0003847; 1-alkyl-2-acetylglycerophosphocholine esterase activity; molecular_function GO:0008152; NA}	{NA}	{NA}	{NA}	{NA}	{NA}	{PF02230:Phospholipase/Carboxylesterase PF01764:Lipase (class 3) PF03403:Platelet-activating factor acetylhydrolase, isoform II PF07859:alpha/beta hydrolase fold PF01083:Cutinase}
A00007	{Contig10:3458999:3463341:-}	{KAG2337096.1; hypothetical protein BDR05DRAFT_970635 [Suillus weaverae]}	{NA}	{NA}	{NA}	{NA}	{GO:0005515; protein binding; molecular_function}	{NA}	{NA}	{NA}	{NA}	{NA}	{PF00400:WD domain, G-beta repeat}
A00008	{Contig10:3464679:3467094:-}	{OJA08008.1; hypothetical protein AZE42_01091 [Rhizopogon vesiculosus]}	{NA}	{pco:PHACADRAFT_137307; K03800 lplA, lplJ lipoate---protein ligase 6.3.1.20 Metabolism; Metabolism of cofactors and vitamins; Lipoic acid metabolism [PATH:ko00785] Metabolism; Global and overview maps; Metabolic pathways [PATH:ko01100]}	{NA}	{NA}	{GO:0003824; NA GO:0006464; protein modification process; biological_process}	{NA}	{NA}	{NA}	{NA}	{NA}	{PF03099:Biotin/lipoate A/B protein ligase family}
A00009	{Contig10:3467335:3467796:+}	{KAG2155103.1; hypothetical protein EDB93DRAFT_135229 [Suillus bovinus]}	{NA}	{sla:SERLADRAFT_339212; }	{NA}	{NA}	{NA}	{NA}	{NA}	{NA}	{NA}	{NA}	{NA}
A00010	{Contig10:3468161:3468517:-}	{KAG1815724.1; DUF498-domain-containing protein [Suillus subaureus]}	{NA}	{gtr:GLOTRDRAFT_33095; K09008 NDUFAF3 NADH dehydrogenase [ubiquinone] 1 alpha subcomplex assembly factor 3 -- Organismal Systems; Environmental adaptation; Thermogenesis [PATH:ko04714]}	{NA}	{NA}	{NA}	{NA}	{NA}	{NA}	{NA}	{NA}	{NA}
A00011	{Contig10:3468897:3471191:-}	{KAG2155104.1; hypothetical protein EDB93DRAFT_1239374 [Suillus bovinus]}	{NA}	{sla:SERLADRAFT_414176; K17770 TOM20 mitochondrial import receptor subunit TOM20 -- }	{NA}	{NA}	{GO:0005515; protein binding; molecular_function GO:0006605; protein targeting; biological_process GO:0005742; mitochondrial outer membrane translocase complex; cellular_component GO:0006886; intracellular protein transport; biological_process}	{NA}	{NA}	{NA}	{NA}	{NA}	{PF02064:MAS20 protein import receptor PF00856:SET domain}
A00012	{Contig10:3471417:3474276:-}	{KAG2155105.1; kinase-like domain-containing protein [Suillus bovinus]}	{NA}	{NA}	{NA}	{NA}	{GO:0005524; ATP binding; molecular_function GO:0006468; protein phosphorylation; biological_process GO:0004672; protein kinase activity; molecular_function}	{NA}	{NA}	{NA}	{NA}	{NA}	{PF07714:Protein tyrosine and serine/threonine kinase PF00069:Protein kinase domain}
A00013	{Contig10:3479269:3481337:-}	{KAG2155107.1; hypothetical protein EDB93DRAFT_135484 [Suillus bovinus]}	{NA}	{NA}	{NA}	{NA}	{GO:0005515; protein binding; molecular_function}	{NA}	{NA}	{NA}	{NA}	{NA}	{PF00646:F-box domain}
A00014	{Contig10:443774:445021:+}	{KAG2134873.1; hypothetical protein EDB93DRAFT_1171653 [Suillus bovinus]}	{NA}	{sla:SERLADRAFT_459933; }	{NA}	{NA}	{NA}	{NA}	{NA}	{NA}	{NA}	{NA}	{NA}
A00015	{Contig10:3486253:3487823:-}	{KAG2155108.1; hypothetical protein EDB93DRAFT_1131258 [Suillus bovinus]}	{NA}	{sla:SERLADRAFT_414154; }	{NA}	{NA}	{GO:0031145; anaphase-promoting complex-dependent proteasomal ubiquitin-dependent protein catabolic process; biological_process GO:0043565; sequence-specific DNA binding; molecular_function GO:0006355; regulation of transcription, DNA-dependent; biological_process GO:0005680; anaphase-promoting complex; cellular_component GO:0030071; regulation of mitotic metaphase/anaphase transition; biological…	{NA}	{NA}	{NA}	{NA}	{NA}	{PF00320:GATA zinc finger PF10471:Anaphase-promoting complex APC subunit CDC26}
A00016	{Contig10:3492304:3493552:-}	{KAG2155109.1; hypothetical protein EDB93DRAFT_135638 [Suillus bovinus]}	{NA}	{cput:CONPUDRAFT_133829; }	{NA}	{NA}	{GO:0005515; protein binding; molecular_function}	{NA}	{NA}	{NA}	{NA}	{NA}	{PF00628:PHD-finger}
A00017	{Contig10:3497251:3498445:+}	{KAG2155110.1; hypothetical protein EDB93DRAFT_1080720 [Suillus bovinus]}	{NA}	{lbc:LACBIDRAFT_246501; }	{NA}	{NA}	{GO:0016021; integral to membrane; cellular_component GO:0005515; protein binding; molecular_function GO:0004252; serine-type endopeptidase activity; molecular_function}	{NA}	{NA}	{NA}	{NA}	{NA}	{PF02845:CUE domain PF01694:Rhomboid family}
A00018	{Contig10:3498556:3500575:-}	{KAG2155111.1; eukaryotic translation initiation factor 3 subunit D [Suillus bovinus]}	{P0CN49; Eukaryotic translation initiation factor 3 subunit D }	{sla:SERLADRAFT_360476; K03251 EIF3D translation initiation factor 3 subunit D -- Genetic Information Processing; Translation; RNA transport [PATH:ko03013]}	{SPAC637.07; KOG2479 Translation initiation factor 3, subunit d (eIF-3d) J Translation, ribosomal structure and biogenesis ;}	{NA}	{GO:0005737; cytoplasm; cellular_component GO:0005852; eukaryotic translation initiation factor 3 complex; cellular_component GO:0003743; translation initiation factor activity; molecular_function}	{NA}	{NA}	{NA}	{NA}	{NA}	{PF05091:Eukaryotic translation initiation factor 3 subunit 7 (eIF-3)}
A00019	{Contig10:3500719:3501492:+}	{KAG2042098.1; hypothetical protein BDR03DRAFT_1088608 [Suillus americanus]}	{O94290; U2 snRNP component ist3 }	{sla:SERLADRAFT_462274; K13107 RBMX2, IST3 RNA-binding motif protein, X-linked 2 -- }	{Hs20545580; KOG0126 Predicted RNA-binding protein (RRM superfamily) R General function prediction only ;}	{NA}	{GO:0003676; nucleic acid binding; molecular_function}	{NA}	{NA}	{NA}	{NA}	{NA}	{PF00076:RNA recognition motif. (a.k.a. RRM, RBD, or RNP domain)}
A00020	{Contig10:3503008:3504111:+}	{KAG2155113.1; hypothetical protein EDB93DRAFT_1131317 [Suillus bovinus]}	{NA}	{NA}	{NA}	{NA}	{NA}	{NA}	{NA}	{NA}	{NA}	{NA}	{NA}
A00021	{Contig10:3504311:3506920:+}	{KAG2155114.1; hypothetical protein EDB93DRAFT_1239380 [Suillus bovinus]}	{NA}	{sla:SERLADRAFT_414179; }	{NA}	{NA}	{GO:0005083; small GTPase regulator activity; molecular_function}	{NA}	{NA}	{NA}	{NA}	{NA}	{PF00780:CNH domain}
A00022	{Contig10:3507204:3510476:-}	{KAG2115858.1; hypothetical protein F5147DRAFT_382844 [Suillus discolor]}	{NA}	{sla:SERLADRAFT_462367; }	{NA}	{NA}	{NA}	{NA}	{NA}	{NA}	{NA}	{NA}	{NA}
A00023	{Contig10:3512143:3514054:-}	{KAG1833587.1; WD40-repeat-containing domain protein [Suillus variegatus]}	{NA}	{NA}	{NA}	{NA}	{GO:0005515; protein binding; molecular_function}	{NA}	{NA}	{NA}	{NA}	{NA}	{PF00400:WD domain, G-beta repeat}
A00024	{Contig10:3524016:3525092:+}	{KAG2155118.1; yeats family protein [Suillus bovinus]}	{Q6FXM4; Protein AF-9 homolog }	{mrr:Moror_16209; K11341 YEATS4, GAS41, YAF9 YEATS domain-containing protein 4 -- }	{YNL107w; KOG3149 Transcription initiation factor IIF, auxiliary subunit K Transcription ;}	{NA}	{GO:0006355; regulation of transcription, DNA-dependent; biological_process GO:0005634; nucleus; cellular_component}	{NA}	{NA}	{NA}	{YES}	{NA}	{PF03366:YEATS family}
A00025	{Contig10:448882:453053:-}	{KAG1817628.1; hypothetical protein BJ212DRAFT_1349834 [Suillus subaureus]}	{NA}	{sla:SERLADRAFT_354564; }	{NA}	{NA}	{NA}	{NA}	{NA}	{NA}	{NA}	{NA}	{NA}
A00026	{Contig10:3525651:3526981:-}	{KAG2155119.1; hypothetical protein EDB93DRAFT_1248074 [Suillus bovinus]}	{NA}	{sla:SERLADRAFT_462371; }	{NA}	{NA}	{GO:0005515; protein binding; molecular_function}	{NA}	{NA}	{NA}	{NA}	{NA}	{PF05773:RWD domain}
A00027	{Contig10:3528477:3530790:+}	{KAG2155120.1; hypothetical protein EDB93DRAFT_136751 [Suillus bovinus]}	{NA}	{sla:SERLADRAFT_462199; }	{NA}	{NA}	{GO:0008270; zinc ion binding; molecular_function GO:0005634; nucleus; cellular_component GO:0000981; sequence-specific DNA binding RNA polymerase II transcription factor activity; molecular_function GO:0006355; regulation of transcription, DNA-dependent; biological_process}	{NA}	{NA}	{NA}	{NA}	{NA}	{PF00172:Fungal Zn(2)-Cys(6) binuclear cluster domain}
A00028	{Contig10:3531128:3531900:-}	{KAG2155121.1; hypothetical protein EDB93DRAFT_136765 [Suillus bovinus]}	{NA}	{sla:SERLADRAFT_436907; }	{NA}	{NA}	{GO:0030155; regulation of cell adhesion; biological_process GO:0030334; regulation of cell migration; biological_process GO:0005102; receptor binding; molecular_function GO:0005606; laminin-1 complex; cellular_component GO:0032040; small-subunit processome; cellular_component GO:0045995; regulation of embryonic development; biological_process}	{NA}	{NA}	{NA}	{NA}	{NA}	{PF06008:Laminin Domain I PF04147:Nop14-like family }
A00029	{Contig10:3532089:3533432:+}	{KAG2155122.1; hypothetical protein EDB93DRAFT_1080723 [Suillus bovinus]}	{NA}	{sla:SERLADRAFT_462202; }	{NA}	{NA}	{NA}	{NA}	{NA}	{NA}	{NA}	{NA}	{NA}
A00030	{Contig10:3533990:3535706:+}	{OJA07991.1; hypothetical protein AZE42_01071 [Rhizopogon vesiculosus]}	{P0CS15; DNA damage-inducible protein 1 }	{mrr:Moror_16203; K11885 DDI1 DNA damage-inducible protein 1 -- }	{SPAC56F8.07; KOG0012 DNA damage inducible protein L Replication, recombination and repair ;}	{NA}	{GO:0004190; aspartic-type endopeptidase activity; molecular_function GO:0006508; proteolysis; biological_process GO:0005515; protein binding; molecular_function}	{NA}	{NA}	{NA}	{NA}	{NA}	{PF00240:Ubiquitin family PF09668:Aspartyl protease}
A00031	{Contig10:3536151:3537476:-}	{KAG2155124.1; TFIID-18kDa-domain-containing protein [Suillus bovinus]}	{O14311; SAGA complex subunit spt3 }	{cput:CONPUDRAFT_64742; K11313 SUPT3H, SPT3 transcription initiation protein SPT3 -- Human Diseases; Cancers: Overview; Transcriptional misregulation in cancer [PATH:ko05202]}	{SPCC61.02; KOG3902 Histone acetyltransferase PCAF/SAGA, subunit SUPT3H/SPT3 K Transcription ;}	{NA}	{GO:0006366; transcription from RNA polymerase II promoter; biological_process}	{PHI:7864; G8BEK7 CPAR2_200390 5480 Candida parapsilosis mycosis Mus musculus (related: house mouse) Hypothetical protein Gene deletion: full; gene complementation reduced virulence}	{Q9Y7E5_CANAL; SPT3 AAD33888.1 328 Candida albicans 5476 Unknown 12072450, 15123810 XP_719383.1, XM_714290.1 {ID:PF02269; Description: TFIID-18kDa} Isolated from a wide variety of substrates including humans animals invasive candidal disease invasive candidal disease {ID:0000124; Method: IGI:CGD; Description: C:SAGA complex} {ID:0003677; Method: IEA:InterPro; Description: F:DNA binding} {ID:00304…	{NA}	{NA}	{NA}	{PF02269:Transcription initiation factor IID, 18kD subunit}
A00032	{Contig10:3537694:3540476:+}	{KAF5388402.1; hypothetical protein D9615_000658 [Tricholomella constricta]}	{NA}	{sla:SERLADRAFT_462219; K03685 rnc, DROSHA, RNT1 ribonuclease III 3.1.26.3 Genetic Information Processing; Translation; Ribosome biogenesis in eukaryotes [PATH:ko03008] Human Diseases; Cancers: Overview; Proteoglycans in cancer [PATH:ko05205]}	{NA}	{NA}	{GO:0006396; RNA processing; biological_process GO:0008152; NA GO:0003723; RNA binding; molecular_function GO:0003824; NA GO:0004525; ribonuclease III activity; molecular_function}	{PHI:2518; Q4WWN9 MET16 746128 Aspergillus fumigatus Invasive Pulmonary Aspergillosis Lethal pathogen phenotype 3'-Phospho-adenylylsulfate reductase altered gene expression / gene regulation lethal}	{A6QV09_AJECN; HCAG_01216 EDN03351.1 300 Ajellomyces capsulata 339724 Unknown 19717792 XP_001544169.1, XM_001544119.1 {ID:PF01507; Description: PAPS_reduct} humans vertebrata Darling's disease Darling's Disease {ID:0004604; Method: IEA:InterPro; Description: F:phosphoadenylyl-sulfate reductase (thioredoxin) activity} {ID:0019344; Method: IEA:InterPro; Description: P:cysteine biosynthetic process}…	{NA}	{NA}	{NA}	{PF01507:Phosphoadenosine phosphosulfate reductase family PF14622:Ribonuclease-III-like PF00636:Ribonuclease III domain}
A00033	{Contig10:3540911:3541321:-}	{KAG2155127.1; hypothetical protein EDB93DRAFT_136879 [Suillus bovinus]}	{NA}	{sla:SERLADRAFT_462221; K18176 COA3 cytochrome c oxidase assembly factor 3, fungi type -- }	{NA}	{NA}	{NA}	{NA}	{NA}	{NA}	{NA}	{NA}	{NA}
A00034	{Contig10:3541745:3544051:+}	{KAG2155128.1; Aldehyde/histidinol dehydrogenase [Suillus bovinus]}	{Q88RC0; Glutarate-semialdehyde dehydrogenase }	{sla:SERLADRAFT_446937; K00135 gabD succinate-semialdehyde dehydrogenase / glutarate-semialdehyde dehydrogenase 1.2.1.16 1.2.1.79 1.2.1.20 Metabolism; Amino acid metabolism; Alanine, aspartate and glutamate metabolism [PATH:ko00250] Metabolism; Amino acid metabolism; Lysine degradation [PATH:ko00310] Metabolism; Amino acid metabolism; Tyrosine metabolism [PATH:ko00350] Metabolism; Carbohydrate me…	{SPAC1002.12c; KOG2451 Aldehyde dehydrogenase C Energy production and conversion ;}	{NA}	{GO:0008152; NA GO:0016491; oxidoreductase activity; molecular_function GO:0055114; oxidation-reduction process; biological_process}	{PHI:2145__PHI:9180; NA}	{NA}	{NA}	{NA}	{NA}	{PF00171:Aldehyde dehydrogenase family}
A00035	{Contig10:3544165:3545649:-}	{KAG2155129.1; hypothetical protein EDB93DRAFT_136505 [Suillus bovinus]}	{Q54BF3; Fumarylacetoacetate hydrolase domain-containing protein 2 homolog }	{sla:SERLADRAFT_462376; }	{Hs7705608; KOG1535 Predicted fumarylacetoacetate hydralase R General function prediction only ;}	{NA}	{GO:0008152; NA GO:0003824; NA}	{PHI:9188; A0A0H3LPR7 BB_RS07570 (BB1518) 518 Bordetella bronchiseptica infectious bronchitis Rattus rattus (related: black rat) Putative hydrolase gene mutation unaffected pathogenicity}	{NA}	{NA}	{NA}	{NA}	{PF01557:Fumarylacetoacetate (FAA) hydrolase family}
A00036	{Contig10:453419:455161:+}	{KAG2134877.1; hypothetical protein EDB93DRAFT_1254382 [Suillus bovinus]}	{NA}	{abp:AGABI1DRAFT78639; K10801 MBD4 methyl-CpG-binding domain protein 4 3.2.2.- Genetic Information Processing; Replication and repair; Base excision repair [PATH:ko03410]}	{NA}	{NA}	{GO:0006284; base-excision repair; biological_process}	{NA}	{NA}	{NA}	{NA}	{NA}	{PF00730:HhH-GPD superfamily base excision DNA repair protein}
A00037	{Contig10:3545735:3547375:+}	{KAG2155130.1; cell division control protein 14, SIN component-domain-containing protein [Suillus bovinus]}	{NA}	{cput:CONPUDRAFT_168826; }	{NA}	{NA}	{GO:0005515; protein binding; molecular_function}	{NA}	{NA}	{NA}	{NA}	{NA}	{PF13176:Tetratricopeptide repeat}
A00038	{Contig10:3549728:3552120:-}	{KIJ70358.1; hypothetical protein HYDPIDRAFT_78831 [Hydnomerulius pinastri MD-312]}	{NA}	{NA}	{NA}	{NA}	{GO:0003676; nucleic acid binding; molecular_function}	{NA}	{NA}	{NA}	{NA}	{NA}	{PF03184:DDE superfamily endonuclease}
A00039	{Contig10:3553770:3554767:+}	{KAG2155133.1; hypothetical protein EDB93DRAFT_1131416 [Suillus bovinus]}	{NA}	{gtr:GLOTRDRAFT_113798; }	{NA}	{NA}	{NA}	{NA}	{NA}	{NA}	{NA}	{NA}	{NA}
A00040	{Contig10:3555341:3561320:+}	{KAG2155136.1; nuclear protein [Suillus bovinus]}	{NA}	{dsq:DICSQDRAFT_161592; }	{NA}	{NA}	{GO:0005506; iron ion binding; molecular_function GO:0016706; oxidoreductase activity, acting on paired donors, with incorporation or reduction of molecular oxygen, 2-oxoglutarate as one donor, and incorporation of one atom each of oxygen into both donors; molecular_function GO:0031418; L-ascorbic acid binding; molecular_function GO:0055114; oxidation-reduction process; biological_process GO:0016…	{NA}	{NA}	{NA}	{NA}	{NA}	{PF10637:Oxoglutarate and iron-dependent oxygenase degradation C-term PF13640:2OG-Fe(II) oxygenase superfamily}
A00041	{Contig10:3561432:3562894:-}	{KAG2155137.1; hypothetical protein EDB93DRAFT_1131424 [Suillus bovinus]}	{NA}	{lbc:LACBIDRAFT_311395; }	{NA}	{NA}	{GO:0003676; nucleic acid binding; molecular_function GO:0007059; chromosome segregation; biological_process GO:0007131; reciprocal meiotic recombination; biological_process}	{NA}	{NA}	{NA}	{NA}	{NA}	{PF07964:Rec10 / Red1 PF00076:RNA recognition motif. (a.k.a. RRM, RBD, or RNP domain)}
A00042	{Contig10:3563139:3566274:-}	{KAG2155138.1; hypothetical protein EDB93DRAFT_1131428 [Suillus bovinus]}	{NA}	{NA}	{NA}	{NA}	{GO:0006614; SRP-dependent cotranslational protein targeting to membrane; biological_process GO:0005525; GTP binding; molecular_function GO:0005524; ATP binding; molecular_function GO:0070526; threonylcarbamoyladenosine biosynthetic process; biological_process GO:0003678; DNA helicase activity; molecular_function GO:0016740; transferase activity; molecular_function GO:0051085; chaperone mediated …	{NA}	{NA}	{NA}	{NA}	{NA}	{PF07931:Chloramphenicol phosphotransferase-like protein PF06068:TIP49 P-loop domain PF06309:Torsin PF00448:SRP54-type protein, GTPase domain PF00004:ATPase family associated with various cellular activities (AAA) PF07728:AAA domain (dynein-related subfamily) PF02367:Threonylcarbamoyl adenosine biosynthesis protein TsaE}
A00043	{Contig10:3567062:3569530:-}	{KAG2155139.1; hypothetical protein EDB93DRAFT_1320027 [Suillus bovinus]}	{NA}	{sla:SERLADRAFT_414257; }	{NA}	{NA}	{GO:0051382; kinetochore assembly; biological_process GO:0000776; kinetochore; cellular_component}	{NA}	{NA}	{NA}	{NA}	{NA}	{PF05837:Centromere protein H (CENP-H)}
A00044	{Contig10:3570199:3571509:-}	{KAG2155140.1; WD40-repeat-containing domain protein [Suillus bovinus]}	{NA}	{sla:SERLADRAFT_367590; K12857 SNRNP40, PRP8BP Prp8 binding protein -- Genetic Information Processing; Transcription; Spliceosome [PATH:ko03040]}	{NA}	{NA}	{GO:0005515; protein binding; molecular_function}	{NA}	{NA}	{NA}	{NA}	{NA}	{PF00400:WD domain, G-beta repeat}
A00045	{Contig10:3574738:3575592:+}	{KIK38080.1; hypothetical protein CY34DRAFT_91600 [Suillus luteus UH-Slu-Lm8-n1]}	{NA}	{NA}	{NA}	{NA}	{GO:0008270; zinc ion binding; molecular_function GO:0003676; nucleic acid binding; molecular_function}	{NA}	{NA}	{NA}	{NA}	{NA}	{PF00098:Zinc knuckle}
A00046	{Contig10:3575667:3579197:+}	{XP_027619707.1; Transposon Tf2-6 polyprotein [Sparassis crispa]}	{NA}	{mrr:Moror_2377; }	{NA}	{NA}	{GO:0006278; RNA-dependent DNA replication; biological_process GO:0003964; RNA-directed DNA polymerase activity; molecular_function GO:0003723; RNA binding; molecular_function}	{NA}	{NA}	{NA}	{NA}	{NA}	{PF00078:Reverse transcriptase (RNA-dependent DNA polymerase)}
A00047	{Contig10:460919:462901:+}	{KAG1815851.1; hypothetical protein EV424DRAFT_1540878 [Suillus variegatus]}	{NA}	{NA}	{NA}	{NA}	{GO:0043565; sequence-specific DNA binding; molecular_function GO:0006355; regulation of transcription, DNA-dependent; biological_process GO:0008270; zinc ion binding; molecular_function GO:0003700; sequence-specific DNA binding transcription factor activity; molecular_function}	{NA}	{NA}	{NA}	{NA}	{NA}	{PF00320:GATA zinc finger}
A00048	{Contig10:3579586:3580005:-}	{NA}	{NA}	{NA}	{NA}	{NA}	{NA}	{NA}	{NA}	{NA}	{NA}	{NA}	{NA}
A00049	{Contig10:3580206:3582438:-}	{KAG2155142.1; autophagy-related protein 22-like protein [Suillus bovinus]}	{NA}	{sla:SERLADRAFT_347095; }	{NA}	{NA}	{GO:0016021; integral to membrane; cellular_component GO:0055085; transmembrane transport; biological_process}	{NA}	{NA}	{NA}	{NA}	{NA}	{PF07690:Major Facilitator Superfamily}
A00050	{Contig10:3583172:3585754:+}	{KAG2155143.1; hypothetical protein EDB93DRAFT_1131477 [Suillus bovinus]}	{NA}	{NA}	{NA}	{NA}	{GO:0009306; protein secretion; biological_process GO:0005788; endoplasmic reticulum lumen; cellular_component}	{NA}	{NA}	{NA}	{NA}	{NA}	{PF07912:ERp29, N-terminal domain}
A00051	{Contig10:3586332:3588590:-}	{KAG2155145.1; MFS general substrate transporter [Suillus bovinus]}	{NA}	{sla:SERLADRAFT_347095; }	{NA}	{NA}	{GO:0055085; transmembrane transport; biological_process GO:0016021; integral to membrane; cellular_component}	{NA}	{NA}	{NA}	{NA}	{NA}	{PF07690:Major Facilitator Superfamily}
A00052	{Contig10:3589525:3590835:-}	{KAG2155146.1; hypothetical protein EDB93DRAFT_1320031 [Suillus bovinus]}	{NA}	{cput:CONPUDRAFT_139737; }	{NA}	{NA}	{NA}	{NA}	{NA}	{NA}	{NA}	{NA}	{NA}
A00053	{Contig10:3591743:3593478:+}	{KAG2155147.1; hypothetical protein EDB93DRAFT_1239404 [Suillus bovinus]}	{NA}	{sla:SERLADRAFT_367593; }	{NA}	{NA}	{NA}	{NA}	{NA}	{NA}	{NA}	{NA}	{NA}
A00054	{Contig10:3593630:3595660:-}	{KAG2155148.1; kinase-like domain-containing protein [Suillus bovinus]}	{NA}	{sla:SERLADRAFT_460732; }	{NA}	{NA}	{GO:0005524; ATP binding; molecular_function GO:0004672; protein kinase activity; molecular_function GO:0006468; protein phosphorylation; biological_process}	{NA}	{NA}	{NA}	{NA}	{NA}	{PF00069:Protein kinase domain PF07714:Protein tyrosine and serine/threonine kinase}
A00055	{Contig10:3596197:3599301:-}	{KAG1806449.1; hypothetical protein HD556DRAFT_1436408 [Suillus plorans]}	{NA}	{NA}	{NA}	{NA}	{NA}	{NA}	{NA}	{NA}	{NA}	{NA}	{NA}
A00056	{Contig10:3599889:3603014:+}	{KAG1806447.1; amine oxidase catalytic domain-containing protein [Suillus plorans]}	{NA}	{sla:SERLADRAFT_367597; K00276 AOC3, AOC2, tynA primary-amine oxidase 1.4.3.21 Metabolism; Amino acid metabolism; Glycine, serine and threonine metabolism [PATH:ko00260] Metabolism; Amino acid metabolism; Tyrosine metabolism [PATH:ko00350] Metabolism; Amino acid metabolism; Phenylalanine metabolism [PATH:ko00360] Metabolism; Metabolism of other amino acids; beta-Alanine metabolism [PATH:ko00410] …	{NA}	{NA}	{GO:0055114; oxidation-reduction process; biological_process GO:0005507; copper ion binding; molecular_function GO:0008131; primary amine oxidase activity; molecular_function GO:0048038; quinone binding; molecular_function GO:0009308; amine metabolic process; biological_process}	{NA}	{NA}	{NA}	{NA}	{NA}	{PF01179:Copper amine oxidase, enzyme domain PF02727:Copper amine oxidase, N2 domain}
A00057	{Contig10:3603256:3606425:+}	{KAG2155152.1; amine oxidase catalytic domain-containing protein [Suillus bovinus]}	{NA}	{sla:SERLADRAFT_367597; K00276 AOC3, AOC2, tynA primary-amine oxidase 1.4.3.21 Metabolism; Amino acid metabolism; Glycine, serine and threonine metabolism [PATH:ko00260] Metabolism; Amino acid metabolism; Tyrosine metabolism [PATH:ko00350] Metabolism; Amino acid metabolism; Phenylalanine metabolism [PATH:ko00360] Metabolism; Metabolism of other amino acids; beta-Alanine metabolism [PATH:ko00410] …	{NA}	{NA}	{GO:0055114; oxidation-reduction process; biological_process GO:0005507; copper ion binding; molecular_function GO:0008131; primary amine oxidase activity; molecular_function GO:0009308; amine metabolic process; biological_process GO:0048038; quinone binding; molecular_function}	{NA}	{NA}	{NA}	{NA}	{NA}	{PF02727:Copper amine oxidase, N2 domain PF02728:Copper amine oxidase, N3 domain PF01179:Copper amine oxidase, enzyme domain}
A00058	{Contig10:466469:467209:-}	{KAG2134880.1; hypothetical protein EDB93DRAFT_1254384 [Suillus bovinus]}	{NA}	{NA}	{NA}	{NA}	{NA}	{NA}	{NA}	{NA}	{NA}	{NA}	{NA}
A00059	{Contig10:3608926:3610704:-}	{KAG1876695.1; hypothetical protein DFJ58DRAFT_835980 [Suillus subalutaceus]}	{NA}	{NA}	{NA}	{NA}	{NA}	{NA}	{NA}	{NA}	{NA}	{NA}	{NA}
A00060	{Contig10:3610859:3611529:+}	{KAG1734277.1; hypothetical protein EDB19DRAFT_1830602, partial [Suillus lakei]}	{NA}	{NA}	{NA}	{NA}	{NA}	{NA}	{NA}	{NA}	{NA}	{NA}	{NA}
A00061	{Contig10:3612211:3613422:+}	{KAG1881925.1; hypothetical protein C8R48DRAFT_766904 [Suillus tomentosus]}	{NA}	{cput:CONPUDRAFT_91955; }	{NA}	{NA}	{GO:0046872; metal ion binding; molecular_function}	{NA}	{NA}	{NA}	{NA}	{NA}	{PF00096:Zinc finger, C2H2 type}
A00062	{Contig10:3613438:3614942:+}	{KAG2104672.1; hypothetical protein F5147DRAFT_807532 [Suillus discolor]}	{NA}	{gtr:GLOTRDRAFT_26531; }	{NA}	{NA}	{NA}	{NA}	{NA}	{NA}	{NA}	{NA}	{NA}
A00063	{Contig10:3617138:3618221:-}	{KAG1796532.1; hypothetical protein EV424DRAFT_1546991 [Suillus variegatus]}	{NA}	{lbc:LACBIDRAFT_306557; }	{NA}	{NA}	{NA}	{NA}	{NA}	{NA}	{NA}	{NA}	{NA}
A00064	{Contig10:3621433:3630964:-}	{KAG2138102.1; casein kinase I isoform delta [Suillus bovinus]}	{P40235; Casein kinase I homolog hhp1 }	{cci:CC1G_06627; K14758 HRR25 casein kinase I homolog HRR25 2.7.11.1 Genetic Information Processing; Translation; Ribosome biogenesis in eukaryotes [PATH:ko03008]}	{SPBC3H7.15; KOG1164 Casein kinase (serine/threonine/tyrosine protein kinase) T Signal transduction mechanisms ;}	{NA}	{GO:0003899; DNA-directed RNA polymerase activity; molecular_function GO:0016020; membrane; cellular_component GO:0006383; transcription from RNA polymerase III promoter; biological_process GO:0030001; metal ion transport; biological_process GO:0004672; protein kinase activity; molecular_function GO:0005524; ATP binding; molecular_function GO:0005666; DNA-directed RNA polymerase III complex; cell…	{PHI:9823; A0A0E0S0W9 Fg08731 5518 Fusarium graminearum Fusarium head blight Brachypodium distachyon (related: stiff brome) Protein kinase domain-containing protein Altered gene expression / gene regulation: silencing; other evidence: transgenic plants reduced virulence}	{NA}	{NA}	{NA}	{NA}	{PF02535:ZIP Zinc transporter PF05132:RNA polymerase III RPC4 PF00069:Protein kinase domain PF07714:Protein tyrosine and serine/threonine kinase}
A00065	{Contig10:3632524:3634214:-}	{KAG1782087.1; ribonuclease H-like domain-containing protein [Suillus placidus]}	{NA}	{NA}	{NA}	{NA}	{GO:0031515; tRNA (m1A) methyltransferase complex; cellular_component GO:0016021; integral to membrane; cellular_component GO:0030488; tRNA methylation; biological_process GO:0016429; tRNA (adenine-N1-)-methyltransferase activity; molecular_function}	{NA}	{NA}	{NA}	{NA}	{NA}	{PF03124:EXS family PF08704:tRNA methyltransferase complex GCD14 subunit}
A00066	{Contig10:3640173:3642690:-}	{KAG2138100.1; kinase-like domain-containing protein [Suillus bovinus]}	{P40235; Casein kinase I homolog hhp1 }	{gtr:GLOTRDRAFT_67767; }	{SPBC3H7.15; KOG1164 Casein kinase (serine/threonine/tyrosine protein kinase) T Signal transduction mechanisms ;}	{NA}	{GO:0005524; ATP binding; molecular_function GO:0006468; protein phosphorylation; biological_process GO:0004672; protein kinase activity; molecular_function}	{PHI:9823; A0A0E0S0W9 Fg08731 5518 Fusarium graminearum Fusarium head blight Brachypodium distachyon (related: stiff brome) Protein kinase domain-containing protein Altered gene expression / gene regulation: silencing; other evidence: transgenic plants reduced virulence}	{NA}	{NA}	{NA}	{NA}	{PF00069:Protein kinase domain PF07714:Protein tyrosine and serine/threonine kinase}
A00067	{Contig10:3646993:3651036:-}	{KAG2056758.1; hypothetical protein BDR06DRAFT_969779 [Suillus hirtellus]}	{NA}	{NA}	{NA}	{NA}	{GO:0003677; DNA binding; molecular_function GO:0046983; protein dimerization activity; molecular_function}	{NA}	{NA}	{NA}	{NA}	{NA}	{PF05699:hAT family C-terminal dimerisation region PF02892:BED zinc finger}
A00068	{Contig10:3652448:3653266:-}	{KAG1805761.1; hypothetical protein EV424DRAFT_260883 [Suillus variegatus]}	{NA}	{cput:CONPUDRAFT_21331; }	{NA}	{NA}	{NA}	{NA}	{NA}	{NA}	{NA}	{NA}	{NA}
A00069	{Contig10:467699:470367:-}	{KAG2134881.1; hypothetical protein EDB93DRAFT_835296 [Suillus bovinus]}	{NA}	{NA}	{NA}	{NA}	{GO:0004672; protein kinase activity; molecular_function GO:0006468; protein phosphorylation; biological_process GO:0005524; ATP binding; molecular_function}	{NA}	{NA}	{NA}	{NA}	{NA}	{PF00069:Protein kinase domain}
A00070	{Contig10:3653447:3654735:-}	{KAG2138095.1; histidine phosphatase superfamily [Suillus bovinus]}	{NA}	{sla:SERLADRAFT_462470; }	{NA}	{NA}	{NA}	{NA}	{NA}	{NA}	{NA}	{NA}	{NA}
A00071	{Contig10:3657655:3657918:+}	{KAG2138093.1; hypothetical protein EDB93DRAFT_729978 [Suillus bovinus]}	{NA}	{NA}	{NA}	{NA}	{NA}	{NA}	{NA}	{NA}	{NA}	{NA}	{NA}
A00072	{Contig10:3658079:3658429:+}	{KAG2138093.1; hypothetical protein EDB93DRAFT_729978 [Suillus bovinus]}	{NA}	{gtr:GLOTRDRAFT_54445; K17362 ACOT13 acyl-coenzyme A thioesterase 13 3.1.2.- }	{NA}	{NA}	{NA}	{NA}	{NA}	{NA}	{NA}	{NA}	{NA}
A00073	{Contig10:3658673:3662865:-}	{KAG2138092.1; hypothetical protein EDB93DRAFT_729944 [Suillus bovinus]}	{NA}	{gtr:GLOTRDRAFT_135903; }	{NA}	{NA}	{GO:0005515; protein binding; molecular_function}	{NA}	{NA}	{NA}	{NA}	{NA}	{PF07647:SAM domain (Sterile alpha motif) PF00018:SH3 domain}
A00074	{Contig10:3663632:3664191:+}	{KAG2138091.1; inosine triphosphate pyrophosphatase-like protein [Suillus bovinus]}	{Q5KPF3; Inosine triphosphate pyrophosphatase }	{dsq:DICSQDRAFT_58419; K01519 ITPA inosine triphosphate pyrophosphatase 3.6.1.- Metabolism; Nucleotide metabolism; Purine metabolism [PATH:ko00230] Metabolism; Xenobiotics biodegradation and metabolism; Drug metabolism - other enzymes [PATH:ko00983] Metabolism; Global and overview maps; Metabolic pathways [PATH:ko01100]}	{At4g13720; KOG3222 Inosine triphosphate pyrophosphatase F Nucleotide transport and metabolism ;}	{NA}	{GO:0016787; hydrolase activity; molecular_function}	{NA}	{NA}	{NA}	{NA}	{NA}	{PF01725:Ham1 family}
A00075	{Contig10:3664943:3667487:+}	{KAG2138090.1; P-loop containing nucleoside triphosphate hydrolase protein [Suillus bovinus]}	{Q03319; Probable ATP-dependent RNA helicase prh1 }	{sla:SERLADRAFT_450011; K17820 DHX33 ATP-dependent RNA helicase DHX33 3.6.4.13 Organismal Systems; Immune system; NOD-like receptor signaling pathway [PATH:ko04621]}	{SPAC2G11.11c; KOG0922 DEAH-box RNA helicase A RNA processing and modification ;}	{NA}	{GO:0008026; ATP-dependent helicase activity; molecular_function GO:0016887; ATPase activity; molecular_function GO:0004386; helicase activity; molecular_function GO:0006355; regulation of transcription, DNA-dependent; biological_process GO:0005524; ATP binding; molecular_function GO:0003676; nucleic acid binding; molecular_function GO:0008134; transcription factor binding; molecular_function}	{NA}	{NA}	{NA}	{NA}	{NA}	{PF02562:PhoH-like protein PF00270:DEAD/DEAH box helicase PF04408:Helicase associated domain (HA2) PF00005:ABC transporter PF00158:Sigma-54 interaction domain PF00271:Helicase conserved C-terminal domain}
A00076	{Contig10:3668636:3671345:+}	{KAG2138089.1; hypothetical protein EDB93DRAFT_1242163 [Suillus bovinus]}	{NA}	{sla:SERLADRAFT_367319; }	{NA}	{NA}	{GO:0005515; protein binding; molecular_function}	{NA}	{NA}	{NA}	{NA}	{NA}	{PF13181:Tetratricopeptide repeat PF00515:Tetratricopeptide repeat}
A00077	{Contig10:3671550:3672284:-}	{KAG2115784.1; hypothetical protein F5147DRAFT_674614 [Suillus discolor]}	{NA}	{sla:SERLADRAFT_461770; }	{NA}	{NA}	{NA}	{NA}	{NA}	{NA}	{NA}	{NA}	{NA}
A00078	{Contig10:3673410:3674585:+}	{KAG1873612.1; aspartate-semialdehyde dehydrogenase [Suillus subalutaceus]}	{P78780; Probable aspartate-semialdehyde dehydrogenase }	{abp:AGABI1DRAFT84332; K00133 asd aspartate-semialdehyde dehydrogenase 1.2.1.11 Metabolism; Amino acid metabolism; Glycine, serine and threonine metabolism [PATH:ko00260] Metabolism; Biosynthesis of other secondary metabolites; Monobactam biosynthesis [PATH:ko00261] Metabolism; Amino acid metabolism; Cysteine and methionine metabolism [PATH:ko00270] Metabolism; Amino acid metabolism; Lysine biosy…	{SPCC1827.06c; KOG4777 Aspartate-semialdehyde dehydrogenase E Amino acid transport and metabolism ;}	{NA}	{GO:0005737; cytoplasm; cellular_component GO:0070402; NADPH binding; molecular_function GO:0051287; NAD binding; molecular_function GO:0016491; oxidoreductase activity; molecular_function GO:0003942; N-acetyl-gamma-glutamyl-phosphate reductase activity; molecular_function GO:0046983; protein dimerization activity; molecular_function GO:0055114; oxidation-reduction process; biological_process GO:…	{NA}	{NA}	{NA}	{NA}	{NA}	{PF02670:1-deoxy-D-xylulose 5-phosphate reductoisomerase PF02774:Semialdehyde dehydrogenase, dimerisation domain PF03435:Saccharopine dehydrogenase NADP binding domain PF01118:Semialdehyde dehydrogenase, NAD binding domain}
A00079	{Contig10:3674810:3679593:-}	{KAG2141629.1; P-loop containing nucleoside triphosphate hydrolase protein [Suillus cothurnatus]}	{NA}	{cput:CONPUDRAFT_168836; K22803 SMC5 structural maintenance of chromosomes protein 5 -- }	{NA}	{NA}	{GO:0005524; ATP binding; molecular_function}	{NA}	{NA}	{NA}	{NA}	{NA}	{PF00004:ATPase family associated with various cellular activities (AAA)}
A00080	{Contig10:471679:475354:-}	{KAG2160200.1; IMP dehydrogenase/GMP reductase [Suillus bovinus]}	{Q5KP44; Inosine-5'-monophosphate dehydrogenase }	{cput:CONPUDRAFT_55000; K00088 IMPDH, guaB IMP dehydrogenase 1.1.1.205 Metabolism; Nucleotide metabolism; Purine metabolism [PATH:ko00230] Metabolism; Xenobiotics biodegradation and metabolism; Drug metabolism - other enzymes [PATH:ko00983] Metabolism; Global and overview maps; Metabolic pathways [PATH:ko01100] Metabolism; Global and overview maps; Biosynthesis of secondary metabolites [PATH:ko01…	{YLR432w; KOG2550 IMP dehydrogenase/GMP reductase F Nucleotide transport and metabolism ;}	{NA}	{GO:0050660; flavin adenine dinucleotide binding; molecular_function GO:0017150; tRNA dihydrouridine synthase activity; molecular_function GO:0006222; UMP biosynthetic process; biological_process GO:0036355; NA GO:0016491; oxidoreductase activity; molecular_function GO:0047465; N-acylglucosamine-6-phosphate 2-epimerase activity; molecular_function GO:0055114; oxidation-reduction process; biologic…	{PHI:2474; E3P6S0 imd1 5207 Cryptococcus neoformans Meningoencephalitis Caenorhabditis elegans (related: roundworm) GTP Biosynthesis gene disruption; gene complementation reduced virulence}	{NA}	{NA}	{NA}	{NA}	{PF04309:Glycerol-3-phosphate responsive antiterminator PF05690:Thiazole biosynthesis protein ThiG PF01070:FMN-dependent dehydrogenase PF03060:Nitronate monooxygenase PF00478:IMP dehydrogenase / GMP reductase domain PF00977:Histidine biosynthesis protein PF04131:Putative N-acetylmannosamine-6-phosphate epimerase PF01207:Dihydrouridine synthase (Dus) PF01180:Dihydroorotate dehydrogenase PF00571:CB…
A00081	{Contig10:3679899:3680997:+}	{KAG1892037.1; hypothetical protein F4604DRAFT_1948539 [Suillus subluteus]}	{NA}	{NA}	{NA}	{NA}	{GO:0046873; metal ion transmembrane transporter activity; molecular_function GO:0030001; metal ion transport; biological_process GO:0055085; transmembrane transport; biological_process GO:0016020; membrane; cellular_component}	{NA}	{NA}	{NA}	{NA}	{NA}	{PF02535:ZIP Zinc transporter}
A00082	{Contig10:3681077:3681925:-}	{KAG2138083.1; ribosomal protein L13-domain-containing protein [Suillus bovinus]}	{Q18CJ1; 50S ribosomal protein L13 }	{sla:SERLADRAFT_383222; K02871 RP-L13, MRPL13, rplM large subunit ribosomal protein L13 -- Genetic Information Processing; Translation; Ribosome [PATH:ko03010]}	{YOR150w; KOG3203 Mitochondrial/chloroplast ribosomal protein L13 J Translation, ribosomal structure and biogenesis ;}	{NA}	{GO:0006412; translation; biological_process GO:0005840; ribosome; cellular_component GO:0003735; structural constituent of ribosome; molecular_function}	{NA}	{NA}	{NA}	{NA}	{NA}	{PF00572:Ribosomal protein L13}
A00083	{Contig10:3682115:3682423:-}	{KAG2138082.1; hypothetical protein EDB93DRAFT_728729 [Suillus bovinus]}	{NA}	{NA}	{NA}	{NA}	{NA}	{NA}	{NA}	{NA}	{NA}	{NA}	{NA}
A00084	{Contig10:3683247:3688426:+}	{KAG2138081.1; CHAT domain-containing protein [Suillus bovinus]}	{NA}	{NA}	{NA}	{NA}	{GO:0005515; protein binding; molecular_function}	{NA}	{NA}	{NA}	{NA}	{NA}	{PF00515:Tetratricopeptide repeat PF13176:Tetratricopeptide repeat}
A00085	{Contig10:3689162:3691991:+}	{KAG2343684.1; kinase-like protein [Suillus weaverae]}	{NA}	{NA}	{NA}	{NA}	{GO:0005524; ATP binding; molecular_function GO:0005515; protein binding; molecular_function GO:0006468; protein phosphorylation; biological_process GO:0004672; protein kinase activity; molecular_function GO:0003824; NA}	{NA}	{NA}	{NA}	{NA}	{NA}	{PF01163:RIO1 family PF00400:WD domain, G-beta repeat PF07714:Protein tyrosine and serine/threonine kinase PF00069:Protein kinase domain}
A00086	{Contig10:3693340:3696073:+}	{KAG2343684.1; kinase-like protein [Suillus weaverae]}	{NA}	{NA}	{NA}	{NA}	{GO:0006468; protein phosphorylation; biological_process GO:0004672; protein kinase activity; molecular_function GO:0005524; ATP binding; molecular_function GO:0005515; protein binding; molecular_function}	{NA}	{NA}	{NA}	{NA}	{NA}	{PF00069:Protein kinase domain PF07714:Protein tyrosine and serine/threonine kinase PF00400:WD domain, G-beta repeat}
A00087	{Contig10:3696585:3702591:-}	{NA}	{NA}	{NA}	{NA}	{NA}	{NA}	{NA}	{NA}	{NA}	{NA}	{NA}	{NA}
A00088	{Contig10:3705456:3711735:+}	{KAG2138076.1; alpha beta-hydrolase [Suillus bovinus]}	{A8NYP0; Pheromone-processing carboxypeptidase KEX1 }	{sla:SERLADRAFT_367312; K01288 KEX1 carboxypeptidase D 3.4.16.6 }	{NA}	{NA}	{GO:0005524; ATP binding; molecular_function GO:0005515; protein binding; molecular_function GO:0004185; serine-type carboxypeptidase activity; molecular_function GO:0006468; protein phosphorylation; biological_process GO:0006508; proteolysis; biological_process GO:0004672; protein kinase activity; molecular_function}	{NA}	{NA}	{NA}	{NA}	{NA}	{PF00450:Serine carboxypeptidase PF00400:WD domain, G-beta repeat PF07714:Protein tyrosine and serine/threonine kinase PF00069:Protein kinase domain}
A00089	{Contig10:3713824:3715001:+}	{KAG2138073.1; hypothetical protein EDB93DRAFT_1165941 [Suillus bovinus]}	{NA}	{cput:CONPUDRAFT_116711; }	{NA}	{NA}	{NA}	{NA}	{NA}	{NA}	{NA}	{NA}	{NA}
A00090	{Contig10:3715790:3718146:-}	{KAG2138072.1; hypothetical protein EDB93DRAFT_1242154 [Suillus bovinus]}	{NA}	{sla:SERLADRAFT_360359; K15376 GPHN gephyrin 2.10.1.1 2.7.7.75 Metabolism; Metabolism of cofactors and vitamins; Folate biosynthesis [PATH:ko00790] Metabolism; Global and overview maps; Metabolic pathways [PATH:ko01100] Organismal Systems; Nervous system; GABAergic synapse [PATH:ko04727]}	{NA}	{NA}	{GO:0032324; molybdopterin cofactor biosynthetic process; biological_process GO:0006777; Mo-molybdopterin cofactor biosynthetic process; biological_process}	{NA}	{NA}	{NA}	{NA}	{NA}	{PF03453:MoeA N-terminal region (domain I and II) PF03454:MoeA C-terminal region (domain IV) PF00994:Probable molybdopterin binding domain}
A00091	{Contig10:475609:479883:+}	{KAG2134884.1; hypothetical protein EDB93DRAFT_1331178 [Suillus bovinus]}	{NA}	{NA}	{NA}	{NA}	{GO:0005515; protein binding; molecular_function GO:0009405; pathogenesis; biological_process}	{NA}	{NA}	{NA}	{NA}	{NA}	{PF00515:Tetratricopeptide repeat PF13176:Tetratricopeptide repeat PF00400:WD domain, G-beta repeat PF09477:Bacterial type II secretion system chaperone protein (type_III_yscG) PF13181:Tetratricopeptide repeat}
A00092	{Contig10:3718584:3724599:-}	{OJA15340.1; hypothetical protein AZE42_03337 [Rhizopogon vesiculosus]}	{NA}	{cput:CONPUDRAFT_168846; }	{NA}	{NA}	{NA}	{NA}	{NA}	{NA}	{NA}	{NA}	{NA}
A00093	{Contig10:3725355:3725750:-}	{NA}	{NA}	{NA}	{NA}	{NA}	{NA}	{NA}	{NA}	{NA}	{NA}	{NA}	{NA}
A00094	{Contig10:3729170:3730505:+}	{KAG2751247.1; 14-3-3 protein [Suillus brevipes Sb2]}	{Q99002; 14-3-3 protein homolog }	{shs:STEHIDRAFT_76385; K06630 YWHAE 14-3-3 protein epsilon -- Environmental Information Processing; Signal transduction; MAPK signaling pathway - yeast [PATH:ko04011] Cellular Processes; Cell growth and death; Cell cycle [PATH:ko04110] Cellular Processes; Cell growth and death; Oocyte meiosis [PATH:ko04114] Environmental Information Processing; Signal transduction; PI3K-Akt signaling pathway [PAT…	{YDR099w; KOG0841 Multifunctional chaperone (14-3-3 family) O Posttranslational modification, protein turnover, chaperones ;}	{gnl|TC-DB|P48349; 8.A.98.1.8 14-3-3-like protein GF14 lambda OS=Arabidopsis thaliana GN=GRF6 PE=1 SV=1}	{NA}	{PHI:7701; Q6S9D7 Pb14-3-3 121759 Paracoccidioides brasiliensis paracoccidioidomycosis Galleria mellonella (related: Greater wax moth) Adhesin altered gene expression / gene regulation: silencing reduced virulence}	{1433_CANAL; BMH1 AAB96910.2 264 Candida albicans 5476 SIMILARITY: Belongs to the 14-3-3 family. 11754483, 15123810 XP_721241.1, XM_716148.1, XP_721512.1, XM_716419.1 {ID:PF00244; Description: 14-3-3} Isolated from a wide variety of substrates including humans animals invasive candidal disease invasive candidal disease {ID:0009986; Method: IDA:CGD; Description: C:cell surface} {ID:0005886; Method…	{NA}	{NA}	{NA}	{NA}
A00095	{Contig10:3742991:3748976:+}	{KAG2138063.1; PLU-1-like protein-domain-containing protein [Suillus bovinus]}	{NA}	{sla:SERLADRAFT_435499; K11446 KDM5, JARID1 histone demethylase JARID1 1.14.11.- }	{NA}	{NA}	{GO:0005634; nucleus; cellular_component GO:0003677; DNA binding; molecular_function GO:0016706; oxidoreductase activity, acting on paired donors, with incorporation or reduction of molecular oxygen, 2-oxoglutarate as one donor, and incorporation of one atom each of oxygen into both donors; molecular_function GO:0055114; oxidation-reduction process; biological_process GO:0005515; protein binding;…	{NA}	{NA}	{NA}	{NA}	{NA}	{PF08429:PLU-1-like protein PF02373:JmjC domain, hydroxylase PF00628:PHD-finger PF01388:ARID/BRIGHT DNA binding domain PF02928:C5HC2 zinc finger}
A00096	{Contig10:3749306:3757374:-}	{KAG2138062.1; hypothetical protein EDB93DRAFT_1300124 [Suillus bovinus]}	{O13657; Putative metal ion transporter C27B12.12c }	{abp:AGABI1DRAFT119978; K16073 ALR, MNR magnesium transporter -- }	{NA}	{gnl|TC-DB|O13657; 1.A.35.2.3 Putative metal ion transporter C27B12.12c OS=Schizosaccharomyces pombe (strain 972 / ATCC 24843) GN=pi066 PE=1 SV=1}	{GO:0019031; viral envelope; cellular_component GO:0019028; viral capsid; cellular_component GO:0046873; metal ion transmembrane transporter activity; molecular_function GO:0030001; metal ion transport; biological_process GO:0055085; transmembrane transport; biological_process GO:0005198; NA GO:0016020; membrane; cellular_component}	{PHI:7813; J9VTH6 Mgt2 (CNAG_03502) 5207 Cryptococcus neoformans fungal meningitis Mus musculus (related: house mouse) Mg transporter Altered gene expression / gene regulation; chemical complementation increased virulence (hypervirulence)}	{NA}	{NA}	{NA}	{NA}	{PF04513:Baculovirus polyhedron envelope protein, PEP, C terminus PF01544:CorA-like Mg2+ transporter protein}
A00097	{Contig10:3757403:3759396:+}	{KAG2138059.1; dynein light intermediate chain-domain-containing protein [Suillus bovinus]}	{NA}	{sla:SERLADRAFT_461652; K10416 DYNC1LI, DNCLI dynein light intermediate chain 1, cytosolic -- Cellular Processes; Transport and catabolism; Phagosome [PATH:ko04145] Organismal Systems; Excretory system; Vasopressin-regulated water reabsorption [PATH:ko04962] Human Diseases; Infectious diseases: Bacterial; Salmonella infection [PATH:ko05132]}	{NA}	{NA}	{GO:0007264; small GTPase mediated signal transduction; biological_process GO:0005525; GTP binding; molecular_function GO:0005622; intracellular; cellular_component}	{NA}	{NA}	{NA}	{NA}	{NA}	{PF08477:Ras of Complex, Roc, domain of DAPkinase}
A00098	{Contig10:3759769:3761059:+}	{KAG2138058.1; hypothetical protein EDB93DRAFT_726306 [Suillus bovinus]}	{NA}	{sla:SERLADRAFT_461659; }	{NA}	{NA}	{NA}	{NA}	{NA}	{NA}	{NA}	{NA}	{NA}
A00099	{Contig10:3761306:3762444:+}	{KAG2138057.1; hepatocellular carcinoma-associated antigen 59-domain-containing protein [Suillus bovinus]}	{NA}	{sla:SERLADRAFT_383135; }	{NA}	{NA}	{NA}	{NA}	{NA}	{NA}	{NA}	{NA}	{NA}
A00100	{Contig10:3762587:3764887:-}	{KAG2138056.1; peptidase S8/S53 domain-containing protein [Suillus bovinus]}	{Q70GH4; Tripeptidyl-peptidase sed3 }	{cput:CONPUDRAFT_64217; K01279 TPP1, CLN2 tripeptidyl-peptidase I 3.4.14.9 Cellular Processes; Transport and catabolism; Lysosome [PATH:ko04142]}	{NA}	{NA}	{GO:0008236; serine-type peptidase activity; molecular_function GO:0006508; proteolysis; biological_process GO:0004252; serine-type endopeptidase activity; molecular_function}	{NA}	{SED3_ASPFU; SED3 CAE46473.1 596 Neosartorya fumigata 330879 FUNCTION: Secreted tripeptidyl-peptidase which degrades proteins at acidic pHs and is involved in virulence.; CATALYTIC ACTIVITY: Release of an N-terminal tripeptide from a polypeptide.; COFACTOR: Binds 1 calcium ion per subunit (By similarity).; BIOPHYSICOCHEMICAL PROPERTIES: pH dependence: Optimum pH is about 6;; SUBCELLULAR LOCATION:…	{NA}	{YES}	{NA}	{PF09286:Pro-kumamolisin, activation domain PF00082:Subtilase family}
A00101	{Contig10:3766119:3768203:+}	{KAG1839529.1; hypothetical protein F4604DRAFT_1599551, partial [Suillus subluteus]}	{NA}	{NA}	{NA}	{NA}	{NA}	{NA}	{NA}	{NA}	{NA}	{NA}	{NA}
A00102	{Contig10:480599:481397:-}	{KAG2121105.1; hypothetical protein DEU56DRAFT_918344 [Suillus clintonianus]}	{NA}	{sla:SERLADRAFT_440581; }	{NA}	{NA}	{NA}	{NA}	{NA}	{NA}	{NA}	{NA}	{NA}
A00103	{Contig10:3769781:3772065:-}	{KAG2138054.1; peptidase S8/S53 domain-containing protein [Suillus bovinus]}	{Q70GH4; Tripeptidyl-peptidase sed3 }	{cput:CONPUDRAFT_64217; K01279 TPP1, CLN2 tripeptidyl-peptidase I 3.4.14.9 Cellular Processes; Transport and catabolism; Lysosome [PATH:ko04142]}	{NA}	{NA}	{GO:0008236; serine-type peptidase activity; molecular_function}	{NA}	{SED3_ASPFU; SED3 CAE46473.1 596 Neosartorya fumigata 330879 FUNCTION: Secreted tripeptidyl-peptidase which degrades proteins at acidic pHs and is involved in virulence.; CATALYTIC ACTIVITY: Release of an N-terminal tripeptide from a polypeptide.; COFACTOR: Binds 1 calcium ion per subunit (By similarity).; BIOPHYSICOCHEMICAL PROPERTIES: pH dependence: Optimum pH is about 6;; SUBCELLULAR LOCATION:…	{NA}	{YES}	{NA}	{PF09286:Pro-kumamolisin, activation domain }
A00104	{Contig10:3772998:3773297:-}	{KAG0693416.1; hypothetical protein DFH29DRAFT_964187 [Suillus ampliporus]}	{NA}	{NA}	{NA}	{NA}	{GO:0019087; transformation of host cell by virus; biological_process GO:0016021; integral to membrane; cellular_component}	{NA}	{NA}	{NA}	{NA}	{NA}	{PF05297:Herpesvirus latent membrane protein 1 (LMP1)}
A00105	{Contig10:3774450:3776745:+}	{KAG2138053.1; peptidase S8/S53 domain-containing protein [Suillus bovinus]}	{D4AIK6; Probable tripeptidyl-peptidase SED4 }	{cput:CONPUDRAFT_64217; K01279 TPP1, CLN2 tripeptidyl-peptidase I 3.4.14.9 Cellular Processes; Transport and catabolism; Lysosome [PATH:ko04142]}	{NA}	{NA}	{GO:0008236; serine-type peptidase activity; molecular_function}	{NA}	{SED4_ARTBC; SED4 EFE36579.1 600 Arthroderma benhamiae 663331 FUNCTION: Secreted tripeptidyl-peptidase which degrades proteins at acidic pHs and is involved in virulence (By similarity).; CATALYTIC ACTIVITY: Release of an N-terminal tripeptide from a polypeptide.; COFACTOR: Binds 1 calcium ion per subunit (By similarity).; SUBCELLULAR LOCATION: Secreted, extracellular space.; SIMILARITY: Belongs …	{NA}	{YES}	{NA}	{PF09286:Pro-kumamolisin, activation domain }
A00106	{Contig10:3777872:3778635:-}	{KAG2138052.1; hypothetical protein EDB93DRAFT_1090832 [Suillus bovinus]}	{NA}	{sla:SERLADRAFT_467544; }	{NA}	{NA}	{GO:0006281; DNA repair; biological_process GO:0016020; membrane; cellular_component GO:0016021; integral to membrane; cellular_component GO:0006260; DNA replication; biological_process GO:0004671; protein C-terminal S-isoprenylcysteine carboxyl O-methyltransferase activity; molecular_function GO:0001882; nucleoside binding; molecular_function GO:0003887; DNA-directed DNA polymerase activity; mol…	{NA}	{NA}	{NA}	{YES}	{NA}	{PF09281:Taq polymerase, exonuclease PF01222:Ergosterol biosynthesis ERG4/ERG24 family PF04140:Isoprenylcysteine carboxyl methyltransferase (ICMT) family }
A00107	{Contig10:3782932:3784132:+}	{KAG2138050.1; hypothetical protein EDB93DRAFT_1253437 [Suillus bovinus]}	{NA}	{NA}	{NA}	{NA}	{NA}	{NA}	{NA}	{NA}	{NA}	{NA}	{NA}
A00108	{Contig10:3785611:3786384:-}	{KAG2138048.1; hypothetical protein EDB93DRAFT_1242140 [Suillus bovinus]}	{NA}	{gtr:GLOTRDRAFT_39071; }	{NA}	{NA}	{GO:0006481; C-terminal protein methylation; biological_process GO:0016021; integral to membrane; cellular_component GO:0016020; membrane; cellular_component GO:0004671; protein C-terminal S-isoprenylcysteine carboxyl O-methyltransferase activity; molecular_function}	{NA}	{NA}	{NA}	{NA}	{NA}	{PF04140:Isoprenylcysteine carboxyl methyltransferase (ICMT) family PF01222:Ergosterol biosynthesis ERG4/ERG24 family}
A00109	{Contig10:3787617:3788823:+}	{KAG2138047.1; hypothetical protein EDB93DRAFT_1253433 [Suillus bovinus]}	{NA}	{NA}	{NA}	{NA}	{NA}	{NA}	{NA}	{NA}	{NA}	{NA}	{NA}
A00110	{Contig10:3789118:3791372:-}	{KAG2138046.1; hypothetical protein EDB93DRAFT_1090850 [Suillus bovinus]}	{Q54BM8; UPF0652 protein }	{sla:SERLADRAFT_446958; }	{NA}	{NA}	{GO:0005622; intracellular; cellular_component GO:0008270; zinc ion binding; molecular_function}	{NA}	{NA}	{NA}	{NA}	{NA}	{PF00643:B-box zinc finger}
A00111	{Contig10:3791647:3793039:-}	{KAG2138045.1; vacuolar membrane protein-domain-containing protein [Suillus bovinus]}	{NA}	{sla:SERLADRAFT_461667; }	{NA}	{gnl|TC-DB|Q5AW73; 8.A.65.1.3 Uncharacterized protein OS=Emericella nidulans (strain FGSC A4 / ATCC 38163 / CBS 112.46 / NRRL 194 / M139) GN=AN7457.2 PE=4 SV=1}	{GO:0015031; protein transport; biological_process GO:0005216; ion channel activity; molecular_function GO:0006811; ion transport; biological_process GO:0008565; protein transporter activity; molecular_function GO:0016021; integral to membrane; cellular_component GO:0016020; membrane; cellular_component}	{NA}	{NA}	{NA}	{NA}	{NA}	{PF03839:Translocation protein Sec62 PF02038:ATP1G1/PLM/MAT8 family}
A00112	{Contig10:3793538:3797582:+}	{KAG2138044.1; P-loop containing nucleoside triphosphate hydrolase protein [Suillus bovinus]}	{Q9P7Q4; Vesicular-fusion protein sec18 }	{cput:CONPUDRAFT_130827; K06027 NSF, SEC18 vesicle-fusing ATPase 3.6.4.6 Cellular Processes; Transport and catabolism; Autophagy - yeast [PATH:ko04138] Organismal Systems; Nervous system; Synaptic vesicle cycle [PATH:ko04721] Organismal Systems; Nervous system; GABAergic synapse [PATH:ko04727] Organismal Systems; Excretory system; Vasopressin-regulated water reabsorption [PATH:ko04962]}	{SPAC1834.11c; KOG0741 AAA+-type ATPase O Posttranslational modification, protein turnover, chaperones ;}	{gnl|TC-DB|P18759; 1.F.1.1.2 Vesicular-fusion protein SEC18 OS=Saccharomyces cerevisiae (strain ATCC 204508 / S288c) GN=SEC18 PE=1 SV=2}	{GO:0003677; DNA binding; molecular_function GO:0003678; DNA helicase activity; molecular_function GO:0004864; protein phosphatase inhibitor activity; molecular_function GO:0043666; regulation of phosphoprotein phosphatase activity; biological_process GO:0070526; threonylcarbamoyladenosine biosynthetic process; biological_process GO:0008134; transcription factor binding; molecular_function GO:000…	{NA}	{NA}	{NA}	{NA}	{NA}	{PF06068:TIP49 P-loop domain PF00005:ABC transporter PF00437:Type II/IV secretion system protein PF07724:AAA domain (Cdc48 subfamily) PF01078:Magnesium chelatase, subunit ChlI PF01695:IstB-like ATP binding protein PF07726:ATPase family associated with various cellular activities (AAA) PF00004:ATPase family associated with various cellular activities (AAA) PF00910:RNA helicase PF01057:Parvovirus n…
A00113	{Contig10:56395:61098:+}	{KAG2127581.1; hypothetical protein EDB93DRAFT_1096448 [Suillus bovinus]}	{NA}	{NA}	{NA}	{NA}	{GO:0006468; protein phosphorylation; biological_process GO:0009103; lipopolysaccharide biosynthetic process; biological_process GO:0016773; phosphotransferase activity, alcohol group as acceptor; molecular_function GO:0005524; ATP binding; molecular_function GO:0046983; protein dimerization activity; molecular_function GO:0004672; protein kinase activity; molecular_function GO:0003824; NA GO:001…	{NA}	{NA}	{NA}	{NA}	{NA}	{PF00069:Protein kinase domain PF06293:Lipopolysaccharide kinase (Kdo/WaaP) family PF01163:RIO1 family PF05699:hAT family C-terminal dimerisation region}
A00114	{Contig10:481991:485084:+}	{KAG1733176.1; hypothetical protein EDD22DRAFT_960249 [Suillus occidentalis]}	{NA}	{sla:SERLADRAFT_439567; }	{NA}	{NA}	{NA}	{NA}	{NA}	{NA}	{NA}	{NA}	{NA}
A00115	{Contig10:3798416:3799753:+}	{KAG2138042.1; NAD(P)-binding protein [Suillus bovinus]}	{Q02046; Methylenetetrahydrofolate dehydrogenase [NAD(+)] }	{sla:SERLADRAFT_461678; K00295 MTD1 methylenetetrahydrofolate dehydrogenase (NAD+) 1.5.1.15 Metabolism; Metabolism of cofactors and vitamins; One carbon pool by folate [PATH:ko00670] Metabolism; Global and overview maps; Metabolic pathways [PATH:ko01100]}	{YKR080w; KOG0089 Methylenetetrahydrofolate dehydrogenase/methylenetetrahydrofolate cyclohydrolase H Coenzyme transport and metabolism ;}	{NA}	{GO:0051287; NAD binding; molecular_function GO:0004488; methylenetetrahydrofolate dehydrogenase (NADP+) activity; molecular_function GO:0009396; folic acid-containing compound biosynthetic process; biological_process GO:0016620; oxidoreductase activity, acting on the aldehyde or oxo group of donors, NAD or NADP as acceptor; molecular_function GO:0003824; NA GO:0055114; oxidation-reduction proces…	{NA}	{NA}	{NA}	{NA}	{NA}	{PF02882:Tetrahydrofolate dehydrogenase/cyclohydrolase, NAD(P)-binding domain PF01118:Semialdehyde dehydrogenase, NAD binding domain PF00763:Tetrahydrofolate dehydrogenase/cyclohydrolase, catalytic domain}
A00116	{Contig10:3800283:3801216:-}	{KAG2138041.1; ORMDL family-domain-containing protein [Suillus bovinus]}	{O42901; Uncharacterized protein C119.09c }	{cput:CONPUDRAFT_38719; }	{SPBC119.09c; KOG3319 Predicted membrane protein S Function unknown ;}	{NA}	{GO:0016021; integral to membrane; cellular_component}	{NA}	{NA}	{NA}	{NA}	{NA}	{PF04061:ORMDL family }
A00117	{Contig10:3802517:3805874:+}	{KAG2138040.1; ribonuclease H-like domain-containing protein [Suillus bovinus]}	{NA}	{NA}	{NA}	{NA}	{NA}	{NA}	{NA}	{NA}	{NA}	{NA}	{NA}
A00118	{Contig10:3810152:3811438:-}	{NA}	{NA}	{NA}	{NA}	{NA}	{NA}	{NA}	{NA}	{NA}	{NA}	{NA}	{NA}
A00119	{Contig10:3814171:3814731:-}	{KAG1804323.1; hypothetical protein BJ212DRAFT_1486746 [Suillus subaureus]}	{NA}	{NA}	{NA}	{NA}	{NA}	{NA}	{NA}	{NA}	{YES}	{NA}	{NA}
A00120	{Contig10:3831024:3831428:+}	{KIK32251.1; hypothetical protein CY34DRAFT_27244 [Suillus luteus UH-Slu-Lm8-n1]}	{NA}	{NA}	{NA}	{NA}	{NA}	{NA}	{NA}	{NA}	{NA}	{NA}	{NA}
A00121	{Contig10:3831860:3832543:-}	{KAG1875253.1; hypothetical protein C8R48DRAFT_560611, partial [Suillus tomentosus]}	{NA}	{NA}	{NA}	{NA}	{NA}	{NA}	{NA}	{NA}	{NA}	{NA}	{NA}
A00122	{Contig10:3835505:3835819:+}	{NA}	{NA}	{NA}	{NA}	{NA}	{NA}	{NA}	{NA}	{NA}	{NA}	{NA}	{NA}
A00123	{Contig10:3840570:3841372:-}	{KAG2127166.1; hypothetical protein EDB93DRAFT_1257253 [Suillus bovinus]}	{NA}	{NA}	{NA}	{NA}	{NA}	{NA}	{NA}	{NA}	{NA}	{NA}	{NA}
A00124	{Contig10:3841733:3842255:-}	{KAG1899965.1; hypothetical protein F5891DRAFT_1189048 [Suillus fuscotomentosus]}	{NA}	{NA}	{NA}	{NA}	{NA}	{NA}	{NA}	{NA}	{NA}	{NA}	{NA}
A00125	{Contig10:485279:487349:+}	{KAG1787588.1; hypothetical protein HD556DRAFT_1501500 [Suillus plorans]}	{NA}	{hir:HETIRDRAFT_320848; }	{NA}	{NA}	{NA}	{NA}	{NA}	{NA}	{NA}	{NA}	{NA}
A00126	{Contig10:3844131:3848193:+}	{KAG2738324.1; hypothetical protein P692DRAFT_20758991, partial [Suillus brevipes Sb2]}	{NA}	{hir:HETIRDRAFT_414795; }	{NA}	{NA}	{NA}	{NA}	{NA}	{NA}	{NA}	{NA}	{NA}
A00127	{Contig10:3849181:3852827:+}	{KAG2135705.1; hypothetical protein EDB93DRAFT_820917 [Suillus bovinus]}	{NA}	{sla:SERLADRAFT_360350; }	{NA}	{NA}	{NA}	{NA}	{NA}	{NA}	{NA}	{NA}	{NA}
A00128	{Contig10:3853034:3855206:-}	{KAG2135706.1; hypothetical protein EDB93DRAFT_820919 [Suillus bovinus]}	{NA}	{sla:SERLADRAFT_435497; K17775 MDM34, MMM2 mitochondrial distribution and morphology protein 34 -- Cellular Processes; Transport and catabolism; Mitophagy - yeast [PATH:ko04139]}	{NA}	{NA}	{NA}	{NA}	{NA}	{NA}	{NA}	{NA}	{NA}
A00129	{Contig10:3856142:3859091:+}	{KAG2105135.1; Up-regulated during septation-domain-containing protein [Suillus discolor]}	{NA}	{gtr:GLOTRDRAFT_119416; }	{NA}	{NA}	{NA}	{NA}	{NA}	{NA}	{NA}	{NA}	{NA}
A00130	{Contig10:3860922:3863663:+}	{KIK15938.1; hypothetical protein PISMIDRAFT_16132 [Pisolithus microcarpus 441]}	{NA}	{NA}	{NA}	{NA}	{GO:0015074; DNA integration; biological_process}	{NA}	{NA}	{NA}	{NA}	{NA}	{PF00665:Integrase core domain}
A00131	{Contig10:3863760:3864953:+}	{KIK15336.1; hypothetical protein PISMIDRAFT_115347 [Pisolithus microcarpus 441]}	{NA}	{NA}	{NA}	{NA}	{NA}	{NA}	{NA}	{NA}	{NA}	{NA}	{NA}
A00132	{Contig10:3870527:3872573:-}	{KAG2135710.1; beta-lactamase/transpeptidase-like protein [Suillus bovinus]}	{NA}	{sla:SERLADRAFT_346351; }	{NA}	{NA}	{NA}	{NA}	{NA}	{NA}	{NA}	{NA}	{NA}
A00133	{Contig10:3873994:3875575:+}	{KAG2135711.1; hypothetical protein EDB93DRAFT_1322697 [Suillus bovinus]}	{NA}	{sla:SERLADRAFT_462666; }	{NA}	{NA}	{NA}	{NA}	{NA}	{NA}	{NA}	{NA}	{NA}
A00134	{Contig10:3876210:3878662:+}	{KAG2135712.1; Poly(A) polymerase [Suillus bovinus]}	{Q10295; Poly(A) polymerase pla1 }	{sla:SERLADRAFT_367679; K14376 PAP poly(A) polymerase 2.7.7.19 Genetic Information Processing; Translation; mRNA surveillance pathway [PATH:ko03015]}	{SPBC646.04; KOG2245 Poly(A) polymerase and related nucleotidyltransferases A RNA processing and modification ;}	{NA}	{GO:0003723; RNA binding; molecular_function GO:0004652; polynucleotide adenylyltransferase activity; molecular_function GO:0005634; nucleus; cellular_component GO:0043631; RNA polyadenylation; biological_process GO:0016779; nucleotidyltransferase activity; molecular_function}	{NA}	{NA}	{NA}	{NA}	{NA}	{PF04928:Poly(A) polymerase central domain PF01909:Nucleotidyltransferase domain PF04926:Poly(A) polymerase predicted RNA binding domain}
A00135	{Contig10:3879176:3880294:-}	{KAG2135713.1; hypothetical protein EDB93DRAFT_1092276 [Suillus bovinus]}	{NA}	{sla:SERLADRAFT_462647; }	{NA}	{NA}	{NA}	{NA}	{NA}	{NA}	{NA}	{NA}	{NA}
A00136	{Contig10:487932:489746:+}	{KAG2121100.1; hypothetical protein DEU56DRAFT_760796 [Suillus clintonianus]}	{NA}	{NA}	{NA}	{NA}	{NA}	{NA}	{NA}	{NA}	{NA}	{NA}	{NA}
A00137	{Contig10:3880941:3886964:+}	{KAG1768069.1; vacuolar protein 14 C-terminal Fig4p binding-domain-containing protein [Suillus placidus]}	{NA}	{sla:SERLADRAFT_360290; K15305 VAC14, TAX1BP2 vacuole morphology and inheritance protein 14 -- Human Diseases; Infectious diseases: Viral; Human T-cell leukemia virus 1 infection [PATH:ko05166] Human Diseases; Cancers: Overview; Viral carcinogenesis [PATH:ko05203]}	{NA}	{NA}	{GO:0005524; ATP binding; molecular_function GO:0051090; regulation of sequence-specific DNA binding transcription factor activity; biological_process GO:0005515; protein binding; molecular_function GO:0006468; protein phosphorylation; biological_process GO:0005634; nucleus; cellular_component GO:0016874; ligase activity; molecular_function GO:0016884; carbon-nitrogen ligase activity, with glutam…	{NA}	{NA}	{NA}	{NA}	{NA}	{PF08826:DMPK coiled coil domain like PF02934:GatB/GatE catalytic domain PF07571:TAF6 C-terminal HEAT repeat domain PF02637:GatB domain PF02985:HEAT repeat}
A00138	{Contig10:3887112:3888263:-}	{KAG2135716.1; tyrosine phosphatase family-domain-containing protein [Suillus bovinus]}	{NA}	{sla:SERLADRAFT_367193; }	{NA}	{NA}	{GO:0004725; protein tyrosine phosphatase activity; molecular_function GO:0006470; protein dephosphorylation; biological_process}	{NA}	{NA}	{NA}	{NA}	{NA}	{PF00102:Protein-tyrosine phosphatase}
A00139	{Contig10:3888688:3898441:+}	{KAF8663397.1; hypothetical protein AX16_000969 [Volvariella volvacea WC 439]}	{NA}	{cput:CONPUDRAFT_139713; }	{NA}	{NA}	{GO:0008134; transcription factor binding; molecular_function GO:0006260; DNA replication; biological_process GO:0015979; photosynthesis; biological_process GO:0016887; ATPase activity; molecular_function GO:0016020; membrane; cellular_component GO:0017048; Rho GTPase binding; molecular_function GO:0016043; cellular component organization; biological_process GO:0016851; magnesium chelatase activi…	{PHI:1573; I1RFJ2 GzOB013 5518 Fusarium graminearum Fusarium Ear Blight Triticum (related: wheat) transcription factor gene deletion lethal}	{NA}	{NA}	{NA}	{NA}	{PF05791:Bacillus haemolytic enterotoxin (HBL) PF07728:AAA domain (dynein-related subfamily) PF00493:MCM P-loop domain PF07726:ATPase family associated with various cellular activities (AAA) PF01078:Magnesium chelatase, subunit ChlI PF00158:Sigma-54 interaction domain PF06371:Diaphanous GTPase-binding Domain PF06367:Diaphanous FH3 Domain}
A00140	{Contig10:3899943:3901454:+}	{KAG2135720.1; hypothetical protein EDB93DRAFT_821448 [Suillus bovinus]}	{NA}	{dsq:DICSQDRAFT_90406; }	{NA}	{NA}	{NA}	{NA}	{NA}	{NA}	{NA}	{NA}	{NA}
A00141	{Contig10:3901918:3906393:-}	{KAG2155143.1; hypothetical protein EDB93DRAFT_1131477 [Suillus bovinus]}	{NA}	{NA}	{NA}	{NA}	{GO:0003677; DNA binding; molecular_function}	{NA}	{NA}	{NA}	{NA}	{NA}	{PF00125:Core histone H2A/H2B/H3/H4}
A00142	{Contig10:3906740:3908187:+}	{KAG2135723.1; WD40-repeat-containing domain protein [Suillus bovinus]}	{NA}	{sla:SERLADRAFT_461625; K12880 THOC3 THO complex subunit 3 -- Genetic Information Processing; Translation; RNA transport [PATH:ko03013] Genetic Information Processing; Transcription; Spliceosome [PATH:ko03040]}	{NA}	{NA}	{GO:0005515; protein binding; molecular_function}	{NA}	{NA}	{NA}	{NA}	{NA}	{PF00400:WD domain, G-beta repeat}
A00143	{Contig10:3908680:3910029:+}	{KAG2135724.1; hypothetical protein EDB93DRAFT_821845 [Suillus bovinus]}	{NA}	{cput:CONPUDRAFT_158379; }	{NA}	{NA}	{NA}	{NA}	{NA}	{NA}	{NA}	{NA}	{NA}
A00144	{Contig10:3910662:3912029:+}	{KAG2135725.1; hypothetical protein EDB93DRAFT_821877 [Suillus bovinus]}	{NA}	{cput:CONPUDRAFT_139737; }	{NA}	{NA}	{NA}	{NA}	{NA}	{NA}	{NA}	{NA}	{NA}
A00145	{Contig10:3912255:3913778:+}	{KAG2135726.1; hypothetical protein EDB93DRAFT_821899 [Suillus bovinus]}	{NA}	{dsq:DICSQDRAFT_90406; }	{NA}	{NA}	{NA}	{NA}	{NA}	{NA}	{NA}	{NA}	{NA}
A00146	{Contig10:3915550:3919163:-}	{KAG2135727.1; hypothetical protein EDB93DRAFT_821872 [Suillus bovinus]}	{NA}	{sla:SERLADRAFT_435474; }	{NA}	{NA}	{NA}	{NA}	{NA}	{NA}	{NA}	{NA}	{NA}
A00147	{Contig10:491212:492075:+}	{KAG2134885.1; hypothetical protein EDB93DRAFT_835713 [Suillus bovinus]}	{NA}	{NA}	{NA}	{NA}	{NA}	{NA}	{NA}	{NA}	{YES}	{NA}	{NA}
A00148	{Contig10:3919673:3921128:+}	{KAG1879467.1; hypothetical protein C8R48DRAFT_685715 [Suillus tomentosus]}	{NA}	{NA}	{NA}	{NA}	{GO:0005515; protein binding; molecular_function}	{NA}	{NA}	{NA}	{NA}	{NA}	{PF00646:F-box domain}
A00149	{Contig10:3921383:3922705:-}	{KAG2135729.1; interferon-inducible GTPase-domain-containing protein [Suillus bovinus]}	{NA}	{cput:CONPUDRAFT_85770; }	{NA}	{NA}	{GO:0005524; ATP binding; molecular_function GO:0000166; nucleotide binding; molecular_function GO:0016887; ATPase activity; molecular_function GO:0016020; membrane; cellular_component GO:0003924; GTPase activity; molecular_function GO:0005525; GTP binding; molecular_function GO:0016817; hydrolase activity, acting on acid anhydrides; molecular_function}	{NA}	{NA}	{NA}	{NA}	{NA}	{PF00005:ABC transporter PF00350:Dynamin family PF01926:50S ribosome-binding GTPase PF03193:RsgA GTPase PF03029:Conserved hypothetical ATP binding protein PF05049:Interferon-inducible GTPase (IIGP)}
A00150	{Contig10:3923114:3924217:-}	{KAG2135729.1; interferon-inducible GTPase-domain-containing protein [Suillus bovinus]}	{NA}	{cput:CONPUDRAFT_85770; }	{NA}	{NA}	{GO:0051188; cofactor biosynthetic process; biological_process GO:0016817; hydrolase activity, acting on acid anhydrides; molecular_function GO:0006412; translation; biological_process GO:0005840; ribosome; cellular_component GO:0005524; ATP binding; molecular_function GO:0003735; structural constituent of ribosome; molecular_function GO:0015684; ferrous iron transport; biological_process GO:0016…	{NA}	{NA}	{NA}	{NA}	{NA}	{PF00410:Ribosomal protein S8 PF01926:50S ribosome-binding GTPase PF05049:Interferon-inducible GTPase (IIGP) PF02421:Ferrous iron transport protein B PF02283:Cobinamide kinase / cobinamide phosphate guanyltransferase PF03193:RsgA GTPase PF00350:Dynamin family PF00005:ABC transporter}
A00151	{Contig10:3926008:3927495:-}	{KAG2135730.1; interferon-inducible GTPase-domain-containing protein [Suillus bovinus]}	{NA}	{cput:CONPUDRAFT_85770; }	{NA}	{NA}	{GO:0005524; ATP binding; molecular_function GO:0005622; intracellular; cellular_component GO:0003924; GTPase activity; molecular_function GO:0016817; hydrolase activity, acting on acid anhydrides; molecular_function GO:0005525; GTP binding; molecular_function GO:0016020; membrane; cellular_component GO:0016887; ATPase activity; molecular_function GO:0007264; small GTPase mediated signal transduc…	{NA}	{NA}	{NA}	{NA}	{NA}	{PF00005:ABC transporter PF01926:50S ribosome-binding GTPase PF00350:Dynamin family PF03193:RsgA GTPase PF05049:Interferon-inducible GTPase (IIGP) PF01443:Viral (Superfamily 1) RNA helicase PF08477:Ras of Complex, Roc, domain of DAPkinase}
A00152	{Contig10:3928580:3929902:-}	{KAG1896491.1; interferon-inducible GTPase-domain-containing protein [Suillus fuscotomentosus]}	{NA}	{cput:CONPUDRAFT_85770; }	{NA}	{NA}	{GO:0005840; ribosome; cellular_component GO:0006412; translation; biological_process GO:0005525; GTP binding; molecular_function GO:0016817; hydrolase activity, acting on acid anhydrides; molecular_function GO:0003735; structural constituent of ribosome; molecular_function GO:0003924; GTPase activity; molecular_function GO:0015684; ferrous iron transport; biological_process GO:0016020; membrane;…	{NA}	{NA}	{NA}	{NA}	{NA}	{PF00410:Ribosomal protein S8 PF02421:Ferrous iron transport protein B PF05049:Interferon-inducible GTPase (IIGP) PF03193:RsgA GTPase PF01926:50S ribosome-binding GTPase}
A00153	{Contig10:3931291:3932587:+}	{KAG2105084.1; hypothetical protein F5147DRAFT_703108 [Suillus discolor]}	{NA}	{NA}	{NA}	{NA}	{NA}	{NA}	{NA}	{NA}	{NA}	{NA}	{NA}
A00154	{Contig10:3932934:3933412:+}	{KAG2060404.1; hypothetical protein BDR06DRAFT_1002899 [Suillus hirtellus]}	{NA}	{NA}	{NA}	{NA}	{NA}	{NA}	{NA}	{NA}	{NA}	{NA}	{NA}
A00155	{Contig10:3933527:3935901:-}	{KAG2135732.1; RNA polymerase I-specific transcription initiation factor RRN3 [Suillus bovinus]}	{NA}	{sla:SERLADRAFT_413954; K15216 RRN3, TIFIA RNA polymerase I-specific transcription initiation factor RRN3 -- }	{NA}	{NA}	{NA}	{NA}	{NA}	{NA}	{NA}	{NA}	{NA}
A00156	{Contig10:3936077:3936635:+}	{KAG2135733.1; NDUFB9, NADH-ubiquinone oxidoreductase [Suillus bovinus]}	{Q0MQE8; NADH dehydrogenase [ubiquinone] 1 beta subcomplex subunit 9 }	{sla:SERLADRAFT_461400; K03965 NDUFB9 NADH dehydrogenase (ubiquinone) 1 beta subcomplex subunit 9 -- Metabolism; Energy metabolism; Oxidative phosphorylation [PATH:ko00190] Metabolism; Global and overview maps; Metabolic pathways [PATH:ko01100] Organismal Systems; Environmental adaptation; Thermogenesis [PATH:ko04714] Organismal Systems; Nervous system; Retrograde endocannabinoid signaling [PATH:…	{NA}	{gnl|TC-DB|Q875B9; 3.D.1.6.2 Part of an hypothetical protein Pa5D0005 (Fragment) - Podospora anserina.}	{NA}	{NA}	{NA}	{NA}	{NA}	{NA}	{NA}
A00157	{Contig10:3939431:3940213:-}	{KAG2135734.1; alpha-galactosidase A [Suillus bovinus]}	{NA}	{gtr:GLOTRDRAFT_126310; }	{NA}	{NA}	{GO:0009103; lipopolysaccharide biosynthetic process; biological_process GO:0006468; protein phosphorylation; biological_process GO:0016773; phosphotransferase activity, alcohol group as acceptor; molecular_function GO:0005524; ATP binding; molecular_function GO:0009244; lipopolysaccharide core region biosynthetic process; biological_process GO:0004672; protein kinase activity; molecular_function…	{NA}	{NA}	{NA}	{NA}	{NA}	{PF06293:Lipopolysaccharide kinase (Kdo/WaaP) family PF00069:Protein kinase domain PF01163:RIO1 family PF06176:Lipopolysaccharide core biosynthesis protein (WaaY)}
A00158	{Contig10:492361:493692:+}	{KAG2134886.1; hypothetical protein EDB93DRAFT_835445 [Suillus bovinus]}	{NA}	{cput:CONPUDRAFT_136522; }	{NA}	{NA}	{GO:0005515; protein binding; molecular_function}	{NA}	{NA}	{NA}	{NA}	{NA}	{PF00018:SH3 domain}
A00159	{Contig10:3942104:3944046:-}	{KAG1805688.1; hypothetical protein BJ212DRAFT_851242 [Suillus subaureus]}	{NA}	{NA}	{NA}	{NA}	{GO:0005515; protein binding; molecular_function}	{NA}	{NA}	{NA}	{NA}	{NA}	{PF00400:WD domain, G-beta repeat}
A00160	{Contig10:3945157:3947250:-}	{TFY78270.1; hypothetical protein EWM64_g5745 [Hericium alpestre]}	{NA}	{NA}	{NA}	{NA}	{NA}	{NA}	{NA}	{NA}	{NA}	{NA}	{NA}
A00161	{Contig10:3947287:3949416:-}	{OJA12935.1; hypothetical protein AZE42_12828 [Rhizopogon vesiculosus]}	{NA}	{NA}	{NA}	{NA}	{GO:0003676; nucleic acid binding; molecular_function GO:0015074; DNA integration; biological_process GO:0008270; zinc ion binding; molecular_function GO:0006352; transcription initiation, DNA-dependent; biological_process GO:0005669; transcription factor TFIID complex; cellular_component}	{NA}	{NA}	{NA}	{NA}	{NA}	{PF00098:Zinc knuckle PF05236:Transcription initiation factor TFIID component TAF4 family PF00665:Integrase core domain}
A00162	{Contig10:3953944:3954963:-}	{KIM52051.1; hypothetical protein SCLCIDRAFT_32955 [Scleroderma citrinum Foug A]}	{NA}	{mpr:MPER_12841; }	{NA}	{NA}	{NA}	{NA}	{NA}	{NA}	{NA}	{NA}	{NA}
A00163	{Contig10:3955006:3955812:-}	{KAG1850254.1; hypothetical protein C8R48DRAFT_778229 [Suillus tomentosus]}	{NA}	{abp:AGABI1DRAFT135084; }	{NA}	{NA}	{NA}	{NA}	{NA}	{NA}	{NA}	{NA}	{NA}
A00164	{Contig10:3956456:3960760:+}	{XP_027619142.1; predicted protein [Sparassis crispa]}	{NA}	{hir:HETIRDRAFT_216527; }	{NA}	{NA}	{GO:0015074; DNA integration; biological_process}	{NA}	{NA}	{NA}	{NA}	{NA}	{PF00665:Integrase core domain}
A00165	{Contig10:3961075:3962724:-}	{XP_027615594.1; predicted protein [Sparassis crispa]}	{NA}	{abv:AGABI2DRAFT176739; }	{NA}	{NA}	{GO:0046872; metal ion binding; molecular_function GO:0016813; hydrolase activity, acting on carbon-nitrogen (but not peptide) bonds, in linear amidines; molecular_function GO:0015074; DNA integration; biological_process}	{NA}	{NA}	{NA}	{NA}	{NA}	{PF00665:Integrase core domain PF00491:Arginase family}
A00166	{Contig10:3962788:3963210:-}	{KIJ67269.1; hypothetical protein HYDPIDRAFT_84712, partial [Hydnomerulius pinastri MD-312]}	{NA}	{sla:SERLADRAFT_349075; }	{NA}	{NA}	{NA}	{NA}	{NA}	{NA}	{NA}	{NA}	{NA}
A00167	{Contig10:3968375:3969463:+}	{KAG1725302.1; hypothetical protein EDB19DRAFT_1915115 [Suillus lakei]}	{NA}	{NA}	{NA}	{NA}	{NA}	{NA}	{NA}	{NA}	{NA}	{NA}	{NA}
A00168	{Contig10:3972432:3973681:+}	{NA}	{NA}	{NA}	{NA}	{NA}	{GO:0003676; nucleic acid binding; molecular_function GO:0006260; DNA replication; biological_process GO:0008270; zinc ion binding; molecular_function GO:0005634; nucleus; cellular_component}	{NA}	{NA}	{NA}	{NA}	{NA}	{PF09507:DNA polymerase subunit Cdc27 PF00098:Zinc knuckle}
A00169	{Contig10:493882:494601:-}	{KAG2134887.1; UbiE family methyltransferase [Suillus bovinus]}	{NA}	{hir:HETIRDRAFT_314117; }	{NA}	{NA}	{GO:0008610; lipid biosynthetic process; biological_process GO:0006464; protein modification process; biological_process GO:0008152; NA GO:0008171; O-methyltransferase activity; molecular_function GO:0006400; tRNA modification; biological_process GO:0008176; tRNA (guanine-N7-)-methyltransferase activity; molecular_function GO:0004719; protein-L-isoaspartate (D-aspartate) O-methyltransferase activ…	{NA}	{NA}	{NA}	{NA}	{NA}	{PF02390:Putative methyltransferase PF01209:ubiE/COQ5 methyltransferase family PF01135:Protein-L-isoaspartate(D-aspartate) O-methyltransferase (PCMT) PF03141:Putative S-adenosyl-L-methionine-dependent methyltransferase PF02353:Mycolic acid cyclopropane synthetase PF08241:Methyltransferase domain PF00891:O-methyltransferase domain PF05175:Methyltransferase small domain}
A00170	{Contig10:3973724:3975496:+}	{THH19889.1; hypothetical protein EUX98_g8684, partial [Antrodiella citrinella]}	{NA}	{mpr:MPER_13203; }	{NA}	{NA}	{GO:0003723; RNA binding; molecular_function GO:0003964; RNA-directed DNA polymerase activity; molecular_function GO:0006278; RNA-dependent DNA replication; biological_process GO:0005089; Rho guanyl-nucleotide exchange factor activity; molecular_function GO:0035023; regulation of Rho protein signal transduction; biological_process}	{NA}	{NA}	{NA}	{NA}	{NA}	{PF00621:RhoGEF domain PF00078:Reverse transcriptase (RNA-dependent DNA polymerase)}
A00171	{Contig10:3975605:3977272:+}	{XP_027619959.1; Transposon Tf2-9 polyprotein [Sparassis crispa]}	{NA}	{mrr:Moror_4032; }	{NA}	{NA}	{GO:0015074; DNA integration; biological_process}	{NA}	{NA}	{NA}	{NA}	{NA}	{PF00665:Integrase core domain}
A00172	{Contig10:3977327:3978385:+}	{NA}	{NA}	{NA}	{NA}	{NA}	{GO:0008270; zinc ion binding; molecular_function GO:0003676; nucleic acid binding; molecular_function}	{NA}	{NA}	{NA}	{NA}	{NA}	{PF00098:Zinc knuckle}
A00173	{Contig10:3979450:3996068:-}	{KAG2128676.1; hypothetical protein EDB93DRAFT_1095873 [Suillus bovinus]}	{NA}	{cput:CONPUDRAFT_50174; }	{NA}	{NA}	{GO:0008233; peptidase activity; molecular_function GO:0005524; ATP binding; molecular_function GO:0016021; integral to membrane; cellular_component GO:0006508; proteolysis; biological_process GO:0008234; cysteine-type peptidase activity; molecular_function}	{NA}	{NA}	{NA}	{NA}	{NA}	{PF03412:Peptidase C39 family PF02902:Ulp1 protease family, C-terminal catalytic domain}
A00174	{Contig10:3997766:3998337:-}	{KAG0698408.1; hypothetical protein DFH29DRAFT_878018 [Suillus ampliporus]}	{NA}	{NA}	{NA}	{NA}	{NA}	{NA}	{NA}	{NA}	{NA}	{NA}	{NA}
A00175	{Contig10:3998715:4003019:-}	{XP_027619142.1; predicted protein [Sparassis crispa]}	{NA}	{hir:HETIRDRAFT_216527; }	{NA}	{NA}	{GO:0015074; DNA integration; biological_process}	{NA}	{NA}	{NA}	{NA}	{NA}	{PF00665:Integrase core domain}
A00176	{Contig10:4004247:4004900:-}	{KAG2097520.1; hypothetical protein F5147DRAFT_777978 [Suillus discolor]}	{NA}	{NA}	{NA}	{NA}	{NA}	{NA}	{NA}	{NA}	{NA}	{NA}	{NA}
A00177	{Contig10:4005827:4006855:-}	{KAG0695192.1; hypothetical protein DFH29DRAFT_1005675 [Suillus ampliporus]}	{NA}	{NA}	{NA}	{NA}	{NA}	{NA}	{NA}	{NA}	{NA}	{NA}	{NA}
A00178	{Contig10:4008136:4009534:-}	{KAG1762052.1; hypothetical protein EV702DRAFT_1206795 [Suillus placidus]}	{NA}	{hir:HETIRDRAFT_305827; }	{NA}	{NA}	{NA}	{NA}	{NA}	{NA}	{NA}	{NA}	{NA}
A00179	{Contig10:4010658:4015537:+}	{XP_027619707.1; Transposon Tf2-6 polyprotein [Sparassis crispa]}	{NA}	{mrr:Moror_2377; }	{NA}	{NA}	{GO:0003676; nucleic acid binding; molecular_function GO:0003723; RNA binding; molecular_function GO:0015074; DNA integration; biological_process GO:0035023; regulation of Rho protein signal transduction; biological_process GO:0003964; RNA-directed DNA polymerase activity; molecular_function GO:0006278; RNA-dependent DNA replication; biological_process GO:0005089; Rho guanyl-nucleotide exchange f…	{NA}	{NA}	{NA}	{NA}	{NA}	{PF00621:RhoGEF domain PF00665:Integrase core domain PF00078:Reverse transcriptase (RNA-dependent DNA polymerase) PF00098:Zinc knuckle}
A00180	{Contig10:495497:502937:-}	{KAG1773530.1; hypothetical protein EDD22DRAFT_946951 [Suillus occidentalis]}	{NA}	{cput:CONPUDRAFT_158364; }	{NA}	{NA}	{GO:0003779; actin binding; molecular_function}	{NA}	{NA}	{NA}	{NA}	{NA}	{PF02205:WH2 motif}
A00181	{Contig10:4015591:4016676:+}	{KAG1829941.1; hypothetical protein EV424DRAFT_1535331 [Suillus variegatus]}	{NA}	{NA}	{NA}	{NA}	{GO:0003676; nucleic acid binding; molecular_function GO:0008270; zinc ion binding; molecular_function}	{NA}	{NA}	{NA}	{NA}	{NA}	{PF00098:Zinc knuckle}
A00182	{Contig10:4017868:4018467:+}	{KAG2065163.1; hypothetical protein BDR04DRAFT_1161784, partial [Suillus decipiens]}	{NA}	{NA}	{NA}	{NA}	{NA}	{NA}	{NA}	{NA}	{NA}	{NA}	{NA}
A00183	{Contig10:4019192:4021228:+}	{KAG0695194.1; hypothetical protein DFH29DRAFT_1005677 [Suillus ampliporus]}	{NA}	{NA}	{NA}	{NA}	{NA}	{NA}	{NA}	{NA}	{YES}	{NA}	{NA}
A00184	{Contig10:4022215:4023600:+}	{KAG1827920.1; hypothetical protein EV424DRAFT_1537096 [Suillus variegatus]}	{NA}	{NA}	{NA}	{NA}	{NA}	{NA}	{NA}	{NA}	{NA}	{NA}	{NA}
A00185	{Contig10:4023617:4025110:-}	{OJA20408.1; hypothetical protein AZE42_12946, partial [Rhizopogon vesiculosus]}	{NA}	{cci:CC1G_11885; }	{NA}	{NA}	{GO:0006313; transposition, DNA-mediated; biological_process GO:0003677; DNA binding; molecular_function GO:0016788; hydrolase activity, acting on ester bonds; molecular_function GO:0004803; transposase activity; molecular_function}	{NA}	{NA}	{NA}	{NA}	{NA}	{PF04827:Plant transposon protein PF01609:Transposase DDE domain}
A00186	{Contig10:4025313:4026150:+}	{KAG2107749.1; hypothetical protein DEU56DRAFT_717937, partial [Suillus clintonianus]}	{NA}	{gtr:GLOTRDRAFT_129264; }	{NA}	{NA}	{NA}	{NA}	{NA}	{NA}	{NA}	{NA}	{NA}
A00187	{Contig10:4026351:4027384:-}	{KAG1821307.1; hypothetical protein EV424DRAFT_861670 [Suillus variegatus]}	{NA}	{NA}	{NA}	{NA}	{NA}	{NA}	{NA}	{NA}	{NA}	{NA}	{NA}
A00188	{Contig10:4028349:4031977:-}	{KAG2135740.1; Lipin/Ned1/Smp2-domain-containing protein [Suillus bovinus]}	{NA}	{sla:SERLADRAFT_446852; K15728 LPIN phosphatidate phosphatase LPIN 3.1.3.4 Metabolism; Lipid metabolism; Glycerolipid metabolism [PATH:ko00561] Metabolism; Lipid metabolism; Glycerophospholipid metabolism [PATH:ko00564] Metabolism; Global and overview maps; Metabolic pathways [PATH:ko01100] Metabolism; Global and overview maps; Biosynthesis of secondary metabolites [PATH:ko01110]}	{NA}	{NA}	{GO:0003993; acid phosphatase activity; molecular_function}	{NA}	{NA}	{NA}	{NA}	{NA}	{PF03767:HAD superfamily, subfamily IIIB (Acid phosphatase)}
A00189	{Contig10:4032410:4033447:-}	{KAG2135741.1; hypothetical protein EDB93DRAFT_1170652 [Suillus bovinus]}	{NA}	{sla:SERLADRAFT_347428; }	{NA}	{NA}	{NA}	{NA}	{NA}	{NA}	{NA}	{NA}	{NA}
A00190	{Contig10:4035195:4036463:-}	{KAG2135742.1; hypothetical protein EDB93DRAFT_822588 [Suillus bovinus]}	{NA}	{tvs:TRAVEDRAFT_165672; }	{NA}	{NA}	{NA}	{NA}	{NA}	{NA}	{NA}	{NA}	{NA}
A00191	{Contig10:504672:505561:+}	{KAG2133218.1; hypothetical protein EDB93DRAFT_1254991 [Suillus bovinus]}	{NA}	{NA}	{NA}	{NA}	{NA}	{NA}	{NA}	{NA}	{NA}	{NA}	{NA}
A00192	{Contig10:4039531:4041920:+}	{KAG2135743.1; hypothetical protein EDB93DRAFT_1170667 [Suillus bovinus]}	{Q6FMQ0; Endopolyphosphatase }	{gtr:GLOTRDRAFT_98318; K06018 PPN1 endopolyphosphatase 3.6.1.10 }	{NA}	{NA}	{GO:0016787; hydrolase activity; molecular_function}	{NA}	{NA}	{NA}	{NA}	{NA}	{PF00149:Calcineurin-like phosphoesterase}
A00193	{Contig10:4042764:4044071:+}	{KAG2135744.1; interferon-inducible GTPase-domain-containing protein [Suillus bovinus]}	{NA}	{cput:CONPUDRAFT_85770; }	{NA}	{NA}	{GO:0016020; membrane; cellular_component GO:0003735; structural constituent of ribosome; molecular_function GO:0003924; GTPase activity; molecular_function GO:0005840; ribosome; cellular_component GO:0006412; translation; biological_process GO:0005525; GTP binding; molecular_function GO:0016817; hydrolase activity, acting on acid anhydrides; molecular_function}	{NA}	{NA}	{NA}	{NA}	{NA}	{PF00350:Dynamin family PF01926:50S ribosome-binding GTPase PF03193:RsgA GTPase PF05049:Interferon-inducible GTPase (IIGP) PF00410:Ribosomal protein S8}
A00194	{Contig10:4044947:4047252:-}	{KAG2135745.1; hypothetical protein EDB93DRAFT_1331067 [Suillus bovinus]}	{NA}	{hir:HETIRDRAFT_323216; }	{NA}	{NA}	{NA}	{NA}	{NA}	{NA}	{NA}	{NA}	{NA}
A00195	{Contig10:4048443:4049951:+}	{KAG2135746.1; interferon-inducible GTPase-domain-containing protein [Suillus bovinus]}	{NA}	{ppl:POSPLDRAFT_95071; }	{NA}	{NA}	{GO:0005524; ATP binding; molecular_function GO:0003924; GTPase activity; molecular_function GO:0003735; structural constituent of ribosome; molecular_function GO:0016817; hydrolase activity, acting on acid anhydrides; molecular_function GO:0005525; GTP binding; molecular_function GO:0006412; translation; biological_process GO:0005840; ribosome; cellular_component GO:0016020; membrane; cellular_c…	{NA}	{NA}	{NA}	{NA}	{NA}	{PF01443:Viral (Superfamily 1) RNA helicase PF00410:Ribosomal protein S8 PF05049:Interferon-inducible GTPase (IIGP) PF01926:50S ribosome-binding GTPase PF00350:Dynamin family PF03193:RsgA GTPase PF00005:ABC transporter}
A00196	{Contig10:4050078:4051377:-}	{KAG2135747.1; Alpha/Beta hydrolase protein, partial [Suillus bovinus]}	{NA}	{cput:CONPUDRAFT_93019; K08726 EPHX2 soluble epoxide hydrolase / lipid-phosphate phosphatase 3.3.2.10 3.1.3.76 Metabolism; Lipid metabolism; Arachidonic acid metabolism [PATH:ko00590] Metabolism; Xenobiotics biodegradation and metabolism; Chloroalkane and chloroalkene degradation [PATH:ko00625] Metabolism; Global and overview maps; Metabolic pathways [PATH:ko01100] Metabolism; Global and overview…	{NA}	{NA}	{NA}	{NA}	{NA}	{NA}	{NA}	{NA}	{NA}
A00197	{Contig10:4051673:4054294:+}	{KAG2135748.1; hypothetical protein EDB93DRAFT_1211644 [Suillus bovinus]}	{NA}	{cput:CONPUDRAFT_168907; }	{NA}	{NA}	{NA}	{NA}	{NA}	{NA}	{NA}	{NA}	{NA}
A00198	{Contig10:4054967:4056075:+}	{KAG2069335.1; cyclin-like protein [Suillus bovinus|Suillus decipiens]}	{O13749; Transcription initiation factor IIB }	{sla:SERLADRAFT_461642; K03124 TFIIB, GTF2B, SUA7, tfb transcription initiation factor TFIIB -- Genetic Information Processing; Transcription; Basal transcription factors [PATH:ko03022] Human Diseases; Cancers: Overview; Viral carcinogenesis [PATH:ko05203]}	{SPAC16E8.16; KOG1597 Transcription initiation factor TFIIB K Transcription ;}	{NA}	{GO:0005634; nucleus; cellular_component GO:0003700; sequence-specific DNA binding transcription factor activity; molecular_function GO:0017025; TBP-class protein binding; molecular_function GO:0051726; regulation of cell cycle; biological_process GO:0006355; regulation of transcription, DNA-dependent; biological_process GO:0008047; enzyme activator activity; molecular_function}	{NA}	{NA}	{NA}	{NA}	{NA}	{PF01857:Retinoblastoma-associated protein B domain PF01022:Bacterial regulatory protein, arsR family PF02984:Cyclin, C-terminal domain PF02058:Guanylin precursor PF00382:Transcription factor TFIIB repeat}
A00199	{Contig10:4056211:4057351:-}	{KAG2135750.1; ribosome biogenesis regulatory protein-domain-containing protein [Suillus bovinus]}	{O59678; Ribosome biogenesis regulatory protein homolog }	{mrr:Moror_13866; K14852 RRS1 regulator of ribosome biosynthesis -- }	{SPBC29A3.16; KOG1765 Regulator of ribosome synthesis J Translation, ribosomal structure and biogenesis ;}	{NA}	{GO:0042254; ribosome biogenesis; biological_process GO:0005634; nucleus; cellular_component GO:0055114; oxidation-reduction process; biological_process GO:0016491; oxidoreductase activity; molecular_function}	{NA}	{NA}	{NA}	{NA}	{NA}	{PF04939:Ribosome biogenesis regulatory protein (RRS1) PF04075:F420H(2)-dependent quinone reductase}
A00200	{Contig10:4057550:4058992:+}	{KAG2135751.1; transcription initiation factor TFIID component TAF4 family-domain-containing protein [Suillus bovinus]}	{NA}	{lbc:LACBIDRAFT_322709; }	{NA}	{NA}	{GO:0006352; transcription initiation, DNA-dependent; biological_process GO:0005669; transcription factor TFIID complex; cellular_component}	{NA}	{NA}	{NA}	{NA}	{NA}	{PF05236:Transcription initiation factor TFIID component TAF4 family}
A00201	{Contig10:4060385:4061104:+}	{KAG2034919.1; hypothetical protein BDR03DRAFT_1001310 [Suillus americanus]}	{NA}	{NA}	{NA}	{NA}	{NA}	{NA}	{NA}	{NA}	{NA}	{NA}	{NA}
A00202	{Contig10:507318:509060:+}	{KAG2144405.1; hypothetical protein EDB93DRAFT_1251645 [Suillus bovinus]}	{NA}	{NA}	{NA}	{NA}	{NA}	{NA}	{NA}	{NA}	{NA}	{NA}	{NA}
A00203	{Contig10:4061342:4062106:+}	{KAG1738737.1; hypothetical protein EDB19DRAFT_2025308 [Suillus lakei]}	{NA}	{gtr:GLOTRDRAFT_56077; }	{NA}	{NA}	{NA}	{NA}	{NA}	{NA}	{NA}	{NA}	{NA}
A00204	{Contig10:4063246:4065645:+}	{THG95219.1; hypothetical protein EW026_g6389 [Phlebia centrifuga]}	{NA}	{gtr:GLOTRDRAFT_134349; }	{NA}	{NA}	{NA}	{NA}	{NA}	{NA}	{NA}	{NA}	{NA}
A00205	{Contig10:4066024:4072131:-}	{KAG1897731.1; kinase-like domain-containing protein [Suillus fuscotomentosus]}	{NA}	{NA}	{NA}	{NA}	{GO:0006468; protein phosphorylation; biological_process GO:0004672; protein kinase activity; molecular_function GO:0005524; ATP binding; molecular_function GO:0005515; protein binding; molecular_function}	{NA}	{NA}	{NA}	{YES}	{NA}	{PF00069:Protein kinase domain PF07714:Protein tyrosine and serine/threonine kinase PF00400:WD domain, G-beta repeat}
A00206	{Contig10:4074719:4076560:+}	{KAG2135756.1; WD40-repeat-containing domain protein [Suillus bovinus]}	{NA}	{NA}	{NA}	{NA}	{GO:0005515; protein binding; molecular_function}	{NA}	{NA}	{NA}	{NA}	{NA}	{PF00400:WD domain, G-beta repeat}
A00207	{Contig10:4076863:4078591:-}	{KAG1774432.1; hypothetical protein EV702DRAFT_523485 [Suillus placidus]}	{NA}	{NA}	{NA}	{NA}	{GO:0016020; membrane; cellular_component}	{NA}	{NA}	{NA}	{NA}	{NA}	{PF03176:MMPL family}
A00208	{Contig10:4079538:4085780:+}	{KAG2105017.1; nucleoporin subcomplex protein binding to Pom34-domain-containing protein [Suillus discolor]}	{NA}	{sla:SERLADRAFT_441822; K14311 NUP188 nuclear pore complex protein Nup188 -- Genetic Information Processing; Translation; RNA transport [PATH:ko03013]}	{NA}	{NA}	{NA}	{NA}	{NA}	{NA}	{NA}	{NA}	{NA}
A00209	{Contig10:4085849:4087209:-}	{KAG2135758.1; methionine aminopeptidase [Suillus bovinus]}	{Q9FV50; Methionine aminopeptidase 1D, chloroplastic/mitochondrial }	{cput:CONPUDRAFT_130989; K01265 map methionyl aminopeptidase 3.4.11.18 }	{At4g37040; KOG2738 Putative methionine aminopeptidase O Posttranslational modification, protein turnover, chaperones ;}	{NA}	{NA}	{NA}	{NA}	{NA}	{NA}	{NA}	{NA}
A00210	{Contig10:4089700:4093085:+}	{XP_027611901.1; Transposon Tf2-6 polyprotein [Sparassis crispa]}	{NA}	{mpr:MPER_13203; }	{NA}	{NA}	{GO:0035023; regulation of Rho protein signal transduction; biological_process GO:0003676; nucleic acid binding; molecular_function GO:0003723; RNA binding; molecular_function GO:0003964; RNA-directed DNA polymerase activity; molecular_function GO:0005089; Rho guanyl-nucleotide exchange factor activity; molecular_function GO:0008270; zinc ion binding; molecular_function GO:0006278; RNA-dependent …	{NA}	{A4RGC8_MAGO7; MGG_11671 EDK03349.1 1158 Magnaporthe oryzae 242507 SIMILARITY: Contains 1 reverse transcriptase domain. 15846337 XP_001411588.1, XM_001411551.1 {ID:PF00385; Description: Chromo} {ID:PF00665; Description: Chromo} {ID:PF00078; Description: rve} Poaceae, especially important on Oryzae herb Rice blast Rice Blast {ID:0005634; Method: IEA:UniProtKB-KW; Description: C:nucleus} {ID:000367…	{NA}	{NA}	{NA}	{PF00098:Zinc knuckle PF00078:Reverse transcriptase (RNA-dependent DNA polymerase) PF00621:RhoGEF domain}
A00211	{Contig10:4093113:4094543:+}	{XP_027620265.1; Transposon Tf2-9 polyprotein [Sparassis crispa]}	{NA}	{mrr:Moror_4032; }	{NA}	{NA}	{GO:0015074; DNA integration; biological_process}	{NA}	{NA}	{NA}	{NA}	{NA}	{PF00665:Integrase core domain}
A00212	{Contig10:4094616:4095692:+}	{KAG1884661.1; hypothetical protein F4604DRAFT_1919130 [Suillus subluteus]}	{NA}	{NA}	{NA}	{NA}	{GO:0008270; zinc ion binding; molecular_function GO:0003676; nucleic acid binding; molecular_function}	{NA}	{NA}	{NA}	{NA}	{NA}	{PF00098:Zinc knuckle}
A00213	{Contig10:512212:513435:+}	{KAF9799719.1; hypothetical protein IEO21_10508 [Postia placenta]}	{NA}	{NA}	{NA}	{NA}	{GO:0004190; aspartic-type endopeptidase activity; molecular_function GO:0006508; proteolysis; biological_process}	{NA}	{NA}	{NA}	{NA}	{NA}	{PF09668:Aspartyl protease}
A00214	{Contig10:4096432:4097229:-}	{KAG1832127.1; hypothetical protein EV424DRAFT_1342599 [Suillus variegatus]}	{NA}	{NA}	{NA}	{NA}	{NA}	{NA}	{NA}	{NA}	{NA}	{NA}	{NA}
A00215	{Contig10:4097359:4099702:+}	{KAG1897260.1; hypothetical protein F5891DRAFT_982853 [Suillus fuscotomentosus]}	{NA}	{sla:SERLADRAFT_439567; }	{NA}	{NA}	{NA}	{NA}	{NA}	{NA}	{NA}	{NA}	{NA}
A00216	{Contig10:4118028:4123048:+}	{KAG1773214.1; hypothetical protein EV702DRAFT_1048302 [Suillus placidus]}	{NA}	{NA}	{NA}	{NA}	{NA}	{NA}	{NA}	{NA}	{NA}	{NA}	{NA}
A00217	{Contig10:4123773:4127113:+}	{KAG2130730.1; ribonuclease H-like domain-containing protein [Suillus clintonianus]}	{NA}	{NA}	{NA}	{NA}	{NA}	{NA}	{NA}	{NA}	{NA}	{NA}	{NA}
A00218	{Contig10:4128213:4130658:+}	{KAG1897731.1; kinase-like domain-containing protein [Suillus fuscotomentosus]}	{NA}	{cput:CONPUDRAFT_135643; }	{NA}	{NA}	{GO:0005515; protein binding; molecular_function GO:0005524; ATP binding; molecular_function GO:0004672; protein kinase activity; molecular_function GO:0006468; protein phosphorylation; biological_process}	{NA}	{NA}	{NA}	{NA}	{NA}	{PF00400:WD domain, G-beta repeat PF07714:Protein tyrosine and serine/threonine kinase PF00069:Protein kinase domain}
A00219	{Contig10:4132529:4134806:+}	{KAG1897731.1; kinase-like domain-containing protein [Suillus fuscotomentosus]}	{NA}	{NA}	{NA}	{NA}	{GO:0006468; protein phosphorylation; biological_process GO:0004672; protein kinase activity; molecular_function GO:0005524; ATP binding; molecular_function GO:0005515; protein binding; molecular_function}	{NA}	{NA}	{NA}	{NA}	{NA}	{PF00400:WD domain, G-beta repeat PF07714:Protein tyrosine and serine/threonine kinase PF00069:Protein kinase domain}
A00220	{Contig10:4135766:4136858:-}	{KAG2054921.1; mitochondrial genome maintenance MGM101 [Suillus hirtellus]}	{Q4P4Y2; Mitochondrial genome maintenance protein MGM101 }	{sla:SERLADRAFT_347200; }	{NA}	{NA}	{GO:0000002; mitochondrial genome maintenance; biological_process GO:0000262; mitochondrial chromosome; cellular_component}	{NA}	{NA}	{NA}	{NA}	{NA}	{PF06420:Mitochondrial genome maintenance MGM101}
A00221	{Contig10:4136954:4140858:+}	{KAG1809247.1; Spc98 family-domain-containing protein [Suillus variegatus]}	{NA}	{hir:HETIRDRAFT_62800; K16572 TUBGCP5, GCP5 gamma-tubulin complex component 5 -- }	{NA}	{NA}	{GO:0000922; spindle pole; cellular_component GO:0005815; microtubule organizing center; cellular_component GO:0000226; microtubule cytoskeleton organization; biological_process}	{NA}	{NA}	{NA}	{NA}	{NA}	{PF04130:Gamma tubulin complex component C-terminal}
A00222	{Contig10:4141172:4142415:-}	{KAG1845024.1; hypothetical protein C8R48DRAFT_780030 [Suillus tomentosus]}	{NA}	{mrr:Moror_16211; }	{NA}	{NA}	{NA}	{NA}	{NA}	{NA}	{NA}	{NA}	{NA}
A00223	{Contig10:4142917:4144618:-}	{KAG2099317.1; hypothetical protein BD769DRAFT_1511564 [Suillus cothurnatus]}	{P0CR49; Protein CSN12 homolog }	{sla:SERLADRAFT_462562; }	{NA}	{NA}	{GO:0005515; protein binding; molecular_function}	{NA}	{NA}	{NA}	{NA}	{NA}	{PF01399:PCI domain}
A00224	{Contig10:66803:69295:-}	{KAG2127575.1; hypothetical protein EDB93DRAFT_1256972 [Suillus bovinus]}	{NA}	{NA}	{NA}	{NA}	{NA}	{NA}	{NA}	{NA}	{NA}	{NA}	{NA}
A00225	{Contig10:513925:515751:+}	{PIL23480.1; hypothetical protein GSI_14791 [Ganoderma sinense ZZ0214-1]}	{NA}	{mpr:MPER_12935; }	{NA}	{NA}	{GO:0015074; DNA integration; biological_process}	{NA}	{NA}	{NA}	{NA}	{NA}	{PF00665:Integrase core domain}
A00226	{Contig10:4144851:4145760:+}	{KAG1809244.1; hypothetical protein EV424DRAFT_1423423 [Suillus variegatus]}	{NA}	{hir:HETIRDRAFT_439015; }	{NA}	{NA}	{GO:0015035; protein disulfide oxidoreductase activity; molecular_function}	{NA}	{NA}	{NA}	{NA}	{NA}	{PF01323:DSBA-like thioredoxin domain}
A00227	{Contig10:4146869:4148553:-}	{KAG2105008.1; aspartate amino-transferase [Suillus discolor]}	{O42652; Aspartate aminotransferase, cytoplasmic }	{sla:SERLADRAFT_475342; K14454 GOT1 aspartate aminotransferase, cytoplasmic 2.6.1.1 Metabolism; Amino acid metabolism; Arginine biosynthesis [PATH:ko00220] Metabolism; Amino acid metabolism; Alanine, aspartate and glutamate metabolism [PATH:ko00250] Metabolism; Amino acid metabolism; Cysteine and methionine metabolism [PATH:ko00270] Metabolism; Amino acid metabolism; Arginine and proline metaboli…	{SPAC10F6.13c; KOG1412 Aspartate aminotransferase/Glutamic oxaloacetic transaminase AAT2/GOT1 E Amino acid transport and metabolism ;}	{gnl|TC-DB|P00505; 9.A.70.1.1 Aspartate aminotransferase, mitochondrial OS=Homo sapiens GN=GOT2 PE=1 SV=3}	{GO:0030170; pyridoxal phosphate binding; molecular_function GO:0009058; biosynthetic process; biological_process}	{PHI:6261; G4YQK3 PsAAT3 67593 Phytophthora sojae soybean stem and root rot Glycine max (related: soybean) Aspartate aminotransferase altered gene expression / gene regulation: silencing reduced virulence}	{NA}	{NA}	{NA}	{NA}	{PF00155:Aminotransferase class I and II}
A00228	{Contig10:4149954:4152266:-}	{KAG2343581.1; hypothetical protein BDR05DRAFT_962648 [Suillus weaverae]}	{NA}	{sla:SERLADRAFT_441825; }	{NA}	{NA}	{NA}	{NA}	{NA}	{NA}	{NA}	{NA}	{NA}
A00229	{Contig10:4152514:4154238:-}	{KAG1877422.1; hypothetical protein F4604DRAFT_1757506 [Suillus subluteus]}	{NA}	{NA}	{NA}	{NA}	{NA}	{NA}	{NA}	{NA}	{NA}	{NA}	{NA}
A00230	{Contig10:4156372:4157597:-}	{KAG1809239.1; hypothetical protein EV424DRAFT_1423398 [Suillus variegatus]}	{NA}	{NA}	{NA}	{NA}	{GO:0055114; oxidation-reduction process; biological_process GO:0016627; oxidoreductase activity, acting on the CH-CH group of donors; molecular_function GO:0016020; membrane; cellular_component GO:0006784; heme a biosynthetic process; biological_process}	{NA}	{NA}	{NA}	{NA}	{NA}	{PF02628:Cytochrome oxidase assembly protein}
A00231	{Contig10:4158037:4160066:-}	{NA}	{NA}	{NA}	{NA}	{NA}	{GO:0016021; integral to membrane; cellular_component}	{NA}	{NA}	{NA}	{NA}	{NA}	{PF06140:Interferon-induced 6-16 family }
A00232	{Contig10:4160623:4164086:-}	{KAG1897773.1; WD40-repeat-containing domain protein [Suillus fuscotomentosus]}	{NA}	{NA}	{NA}	{NA}	{GO:0005515; protein binding; molecular_function GO:0016021; integral to membrane; cellular_component}	{NA}	{NA}	{NA}	{NA}	{NA}	{PF06140:Interferon-induced 6-16 family PF00515:Tetratricopeptide repeat PF00400:WD domain, G-beta repeat}
A00233	{Contig10:4165517:4167848:-}	{KAG2066426.1; WD40 repeat-like protein [Suillus decipiens]}	{NA}	{NA}	{NA}	{NA}	{GO:0005515; protein binding; molecular_function GO:0005496; steroid binding; molecular_function GO:0006355; regulation of transcription, DNA-dependent; biological_process GO:0004882; androgen receptor activity; molecular_function GO:0030521; androgen receptor signaling pathway; biological_process GO:0005634; nucleus; cellular_component GO:0003677; DNA binding; molecular_function}	{NA}	{NA}	{NA}	{NA}	{NA}	{PF00515:Tetratricopeptide repeat PF00400:WD domain, G-beta repeat PF02166:Androgen receptor}
A00234	{Contig10:4169326:4171405:-}	{KAG2054938.1; WD40 repeat-like protein [Suillus hirtellus]}	{NA}	{NA}	{NA}	{NA}	{GO:0005515; protein binding; molecular_function}	{NA}	{NA}	{NA}	{NA}	{NA}	{PF00400:WD domain, G-beta repeat}
A00235	{Contig10:4172801:4173313:-}	{KIK15336.1; hypothetical protein PISMIDRAFT_115347 [Pisolithus microcarpus 441]}	{NA}	{cdu:CD36_00040; }	{NA}	{NA}	{NA}	{NA}	{NA}	{NA}	{NA}	{NA}	{NA}
A00236	{Contig10:517165:520001:+}	{XP_001835316.2; transcriptional factor B3 [Coprinopsis cinerea okayama7#130]}	{NA}	{cci:CC1G_10243; }	{NA}	{NA}	{GO:0003677; DNA binding; molecular_function GO:0016787; hydrolase activity; molecular_function GO:0004386; helicase activity; molecular_function GO:0005524; ATP binding; molecular_function GO:0000723; telomere maintenance; biological_process GO:0003678; DNA helicase activity; molecular_function GO:0006281; DNA repair; biological_process}	{NA}	{NA}	{NA}	{NA}	{NA}	{PF01443:Viral (Superfamily 1) RNA helicase PF04851:Type III restriction enzyme, res subunit PF05970:PIF1-like helicase PF02689:Helicase}
A00237	{Contig10:4173338:4174954:-}	{KIK15938.1; hypothetical protein PISMIDRAFT_16132 [Pisolithus microcarpus 441]}	{NA}	{mpr:MPER_11577; }	{NA}	{NA}	{NA}	{NA}	{NA}	{NA}	{NA}	{NA}	{NA}
A00238	{Contig10:4175006:4177252:-}	{KAF9220100.1; hypothetical protein BS17DRAFT_853789 [Gyrodon lividus]}	{NA}	{NA}	{NA}	{NA}	{GO:0015074; DNA integration; biological_process}	{NA}	{NA}	{NA}	{NA}	{NA}	{PF00665:Integrase core domain}
A00239	{Contig10:4178418:4180786:-}	{KAG0707160.1; hypothetical protein DFH29DRAFT_995221 [Suillus ampliporus]}	{NA}	{NA}	{NA}	{NA}	{GO:0015074; DNA integration; biological_process}	{NA}	{NA}	{NA}	{NA}	{NA}	{PF00665:Integrase core domain}
A00240	{Contig10:4181368:4183457:-}	{KAG1794073.1; kinase-like domain-containing protein [Suillus subaureus]}	{NA}	{NA}	{NA}	{NA}	{GO:0004672; protein kinase activity; molecular_function GO:0006468; protein phosphorylation; biological_process GO:0005524; ATP binding; molecular_function}	{NA}	{NA}	{NA}	{NA}	{NA}	{PF07714:Protein tyrosine and serine/threonine kinase PF00069:Protein kinase domain}
A00241	{Contig10:4187227:4188511:+}	{KAG2130207.1; hypothetical protein EDB93DRAFT_1180920 [Suillus bovinus]}	{NA}	{lbc:LACBIDRAFT_292706; }	{NA}	{NA}	{GO:0030244; cellulose biosynthetic process; biological_process GO:0016020; membrane; cellular_component GO:0016760; cellulose synthase (UDP-forming) activity; molecular_function}	{NA}	{NA}	{NA}	{NA}	{NA}	{PF03552:Cellulose synthase}
A00242	{Contig10:4189085:4193100:+}	{KAG1904384.1; hypothetical protein F5891DRAFT_1275928 [Suillus fuscotomentosus]}	{NA}	{NA}	{NA}	{NA}	{GO:0005515; protein binding; molecular_function GO:0043531; ADP binding; molecular_function GO:0019079; viral genome replication; biological_process}	{NA}	{NA}	{NA}	{NA}	{NA}	{PF00931:NB-ARC domain PF00400:WD domain, G-beta repeat PF01057:Parvovirus non-structural protein NS1}
A00243	{Contig10:4193706:4195265:-}	{KAG1897778.1; hypothetical protein F5891DRAFT_1047424 [Suillus fuscotomentosus]}	{Q92357; Cell fusion protein cfr1 }	{shs:STEHIDRAFT_76667; K19877 CHS5 chitin biosynthesis protein CHS5 -- }	{NA}	{NA}	{GO:0005515; protein binding; molecular_function}	{NA}	{NA}	{NA}	{NA}	{NA}	{PF00041:Fibronectin type III domain}
A00244	{Contig10:4195833:4198252:+}	{KAG2130201.1; xanthine/uracil permease [Suillus bovinus]}	{P48777; Purine permease }	{sla:SERLADRAFT_373253; }	{NA}	{gnl|TC-DB|P48777; 2.A.40.4.4 PURINE PERMEASE - Emericella nidulans (Aspergillus nidulans).}	{GO:0055085; transmembrane transport; biological_process GO:0006810; transport; biological_process GO:0005215; NA GO:0016020; membrane; cellular_component}	{NA}	{NA}	{NA}	{NA}	{NA}	{PF00860:Permease family}
A00245	{Contig10:4199517:4206007:+}	{KAG1770263.1; WD40-repeat-containing domain protein [Suillus occidentalis]}	{NA}	{NA}	{NA}	{NA}	{GO:0005515; protein binding; molecular_function}	{NA}	{NA}	{NA}	{NA}	{NA}	{PF13181:Tetratricopeptide repeat PF00400:WD domain, G-beta repeat}
A00246	{Contig10:4206791:4210562:-}	{KAG2130198.1; hypothetical protein EDB93DRAFT_1095067 [Suillus bovinus]}	{NA}	{gtr:GLOTRDRAFT_102971; K20184 VPS41 vacuolar protein sorting-associated protein 41 -- Cellular Processes; Transport and catabolism; Autophagy - yeast [PATH:ko04138]}	{NA}	{NA}	{GO:0009523; photosystem II; cellular_component GO:0005515; protein binding; molecular_function GO:0032040; small-subunit processome; cellular_component GO:0042651; thylakoid membrane; cellular_component GO:0016192; vesicle-mediated transport; biological_process GO:0009654; oxygen evolving complex; cellular_component GO:0005783; endoplasmic reticulum; cellular_component GO:0015979; photosynthesis…	{NA}	{NA}	{NA}	{NA}	{NA}	{PF04147:Nop14-like family PF04725:Photosystem II 10 kDa polypeptide PsbR PF03896:Translocon-associated protein (TRAP), alpha subunit PF00637:Region in Clathrin and VPS PF00400:WD domain, G-beta repeat}
A00247	{Contig10:520706:525425:+}	{KAG1901164.1; kinase-like domain-containing protein [Suillus fuscotomentosus]}	{NA}	{NA}	{NA}	{NA}	{GO:0016020; membrane; cellular_component GO:0005524; ATP binding; molecular_function GO:0016773; phosphotransferase activity, alcohol group as acceptor; molecular_function GO:0009103; lipopolysaccharide biosynthetic process; biological_process GO:0003824; NA GO:0004672; protein kinase activity; molecular_function GO:0006468; protein phosphorylation; biological_process}	{NA}	{NA}	{NA}	{NA}	{NA}	{PF00069:Protein kinase domain PF06293:Lipopolysaccharide kinase (Kdo/WaaP) family PF07714:Protein tyrosine and serine/threonine kinase PF01163:RIO1 family}
A00248	{Contig10:4211659:4213758:-}	{KAG2130197.1; hypothetical protein EDB93DRAFT_1180875 [Suillus bovinus]}	{NA}	{cput:CONPUDRAFT_168971; }	{NA}	{NA}	{NA}	{NA}	{NA}	{NA}	{NA}	{NA}	{NA}
A00249	{Contig10:4214482:4216023:-}	{KAG2130196.1; heterokaryon incompatibility protein-domain-containing protein [Suillus bovinus]}	{NA}	{cput:CONPUDRAFT_111385; }	{NA}	{NA}	{NA}	{NA}	{NA}	{NA}	{NA}	{NA}	{NA}
A00250	{Contig10:4217547:4219811:+}	{KAG2055117.1; WD40 repeat-like protein [Suillus hirtellus]}	{NA}	{NA}	{NA}	{NA}	{GO:0005515; protein binding; molecular_function}	{NA}	{NA}	{NA}	{NA}	{NA}	{PF00400:WD domain, G-beta repeat}
A00251	{Contig10:4221272:4222770:-}	{KAG2130188.1; WD40-repeat-containing domain protein [Suillus bovinus]}	{NA}	{sla:SERLADRAFT_452555; K12602 WDR61, REC14, SKI8 WD repeat-containing protein 61 -- Genetic Information Processing; Folding, sorting and degradation; RNA degradation [PATH:ko03018]}	{NA}	{NA}	{GO:0030117; membrane coat; cellular_component GO:0006886; intracellular protein transport; biological_process GO:0016192; vesicle-mediated transport; biological_process GO:0005198; NA GO:0005515; protein binding; molecular_function}	{NA}	{NA}	{NA}	{NA}	{NA}	{PF04053:Coatomer WD associated region PF00400:WD domain, G-beta repeat}
A00252	{Contig10:4222850:4223349:+}	{KAG2130187.1; 50S ribosomal protein L30e-like protein [Suillus bovinus]}	{Q76I81; 40S ribosomal protein S12 }	{lbc:LACBIDRAFT_183186; K02951 RP-S12e, RPS12 small subunit ribosomal protein S12e -- Genetic Information Processing; Translation; Ribosome [PATH:ko03010]}	{Hs14277700; KOG3406 40S ribosomal protein S12 J Translation, ribosomal structure and biogenesis ;}	{NA}	{NA}	{NA}	{NA}	{NA}	{NA}	{NA}	{NA}
A00253	{Contig10:4225231:4226387:-}	{KAG2130823.1; hypothetical protein EDB93DRAFT_1108269 [Suillus bovinus]}	{NA}	{NA}	{NA}	{NA}	{NA}	{NA}	{NA}	{NA}	{NA}	{NA}	{NA}
A00254	{Contig10:4235125:4235916:-}	{KAG2130817.1; hypothetical protein EDB93DRAFT_1094656 [Suillus bovinus]}	{NA}	{NA}	{NA}	{NA}	{GO:0008270; zinc ion binding; molecular_function GO:0003676; nucleic acid binding; molecular_function}	{NA}	{NA}	{NA}	{NA}	{NA}	{PF00098:Zinc knuckle}
A00255	{Contig10:4237833:4238930:+}	{KAG1835565.1; hypothetical protein EV424DRAFT_1340656 [Suillus variegatus]}	{NA}	{NA}	{NA}	{NA}	{NA}	{NA}	{NA}	{NA}	{NA}	{NA}	{NA}
A00256	{Contig10:4241905:4246426:+}	{KIK35594.1; hypothetical protein CY34DRAFT_16927 [Suillus luteus UH-Slu-Lm8-n1]}	{NA}	{hir:HETIRDRAFT_429895; }	{NA}	{NA}	{NA}	{NA}	{NA}	{NA}	{NA}	{NA}	{NA}
A00257	{Contig10:4246734:4248988:+}	{KAG2130186.1; hypothetical protein EDB93DRAFT_1095060 [Suillus bovinus]}	{NA}	{sla:SERLADRAFT_476636; }	{NA}	{NA}	{NA}	{NA}	{NA}	{NA}	{NA}	{NA}	{NA}
A00258	{Contig10:526664:527781:+}	{KAG1815884.1; nucleoside phosphorylase domain-containing protein [Suillus variegatus]}	{A8P7Y3; S-methyl-5'-thioadenosine phosphorylase }	{sla:SERLADRAFT_459934; K00772 mtaP, MTAP 5'-methylthioadenosine phosphorylase 2.4.2.28 Metabolism; Amino acid metabolism; Cysteine and methionine metabolism [PATH:ko00270] Metabolism; Global and overview maps; Metabolic pathways [PATH:ko01100]}	{SPAC16C9.02c; KOG3985 Methylthioadenosine phosphorylase MTAP F Nucleotide transport and metabolism ;}	{NA}	{GO:0003824; NA GO:0009116; nucleoside metabolic process; biological_process}	{NA}	{NA}	{NA}	{NA}	{NA}	{PF01048:Phosphorylase superfamily}
A00259	{Contig10:4249315:4250405:-}	{KAG2130185.1; hypothetical protein EDB93DRAFT_1332106 [Suillus bovinus]}	{NA}	{shs:STEHIDRAFT_92828; }	{NA}	{NA}	{GO:0016788; hydrolase activity, acting on ester bonds; molecular_function GO:0006629; lipid metabolic process; biological_process}	{NA}	{NA}	{NA}	{NA}	{NA}	{PF00657:GDSL-like Lipase/Acylhydrolase}
A00260	{Contig10:4252340:4255481:-}	{KAG1750999.1; hypothetical protein EDD22DRAFT_1002386 [Suillus occidentalis]}	{NA}	{NA}	{NA}	{NA}	{GO:0005515; protein binding; molecular_function}	{NA}	{NA}	{NA}	{NA}	{NA}	{PF00400:WD domain, G-beta repeat}
A00261	{Contig10:4256021:4256993:+}	{KAG1759296.1; hypothetical protein EDD22DRAFT_956003 [Suillus occidentalis]}	{NA}	{NA}	{NA}	{NA}	{NA}	{NA}	{NA}	{NA}	{NA}	{NA}	{NA}
A00262	{Contig10:4259179:4260430:+}	{KAG2130181.1; hypothetical protein EDB93DRAFT_85739 [Suillus bovinus]}	{NA}	{NA}	{NA}	{NA}	{NA}	{NA}	{NA}	{NA}	{NA}	{NA}	{NA}
A00263	{Contig10:4261532:4262125:-}	{KAG2142808.1; hypothetical protein EDB93DRAFT_1252270 [Suillus bovinus]}	{NA}	{aor:AO090003000342; }	{NA}	{NA}	{NA}	{NA}	{NA}	{NA}	{NA}	{NA}	{NA}
A00264	{Contig10:4262911:4263935:-}	{KAG2130179.1; hypothetical protein EDB93DRAFT_1180802 [Suillus bovinus]}	{NA}	{NA}	{NA}	{NA}	{NA}	{NA}	{NA}	{NA}	{NA}	{NA}	{NA}
A00265	{Contig10:4268167:4270495:+}	{KAG1897731.1; kinase-like domain-containing protein [Suillus fuscotomentosus]}	{NA}	{NA}	{NA}	{NA}	{GO:0004672; protein kinase activity; molecular_function GO:0006468; protein phosphorylation; biological_process GO:0005515; protein binding; molecular_function GO:0005524; ATP binding; molecular_function}	{NA}	{NA}	{NA}	{NA}	{NA}	{PF00400:WD domain, G-beta repeat PF00069:Protein kinase domain PF07714:Protein tyrosine and serine/threonine kinase}
A00266	{Contig10:4274179:4274412:+}	{KAG2139087.1; hypothetical protein EDB93DRAFT_707366 [Suillus bovinus]}	{NA}	{NA}	{NA}	{NA}	{NA}	{NA}	{NA}	{NA}	{NA}	{NA}	{NA}
A00267	{Contig10:4276251:4278197:+}	{KAG1761823.1; WD40-repeat-containing domain protein [Suillus placidus]}	{NA}	{NA}	{NA}	{NA}	{GO:0070008; serine-type exopeptidase activity; molecular_function GO:0005515; protein binding; molecular_function GO:0004252; serine-type endopeptidase activity; molecular_function}	{NA}	{NA}	{NA}	{NA}	{NA}	{PF02897:Prolyl oligopeptidase, N-terminal beta-propeller domain PF00400:WD domain, G-beta repeat}
A00268	{Contig10:4280783:4284432:-}	{KAG2142813.1; hypothetical protein EDB93DRAFT_1338417 [Suillus bovinus]}	{NA}	{sla:SERLADRAFT_417630; }	{NA}	{NA}	{GO:0016787; hydrolase activity; molecular_function}	{NA}	{NA}	{NA}	{NA}	{NA}	{PF01979:Amidohydrolase family}
A00269	{Contig10:528220:528961:-}	{KAG2134897.1; hypothetical protein EDB93DRAFT_836192 [Suillus bovinus]}	{NA}	{sla:SERLADRAFT_444230; }	{NA}	{NA}	{NA}	{NA}	{NA}	{NA}	{NA}	{NA}	{NA}
A00270	{Contig10:4287104:4288547:-}	{KAG2142810.1; Alpha/Beta hydrolase protein [Suillus bovinus]}	{NA}	{sla:SERLADRAFT_476642; }	{NA}	{NA}	{GO:0006508; proteolysis; biological_process GO:0008236; serine-type peptidase activity; molecular_function GO:0016787; hydrolase activity; molecular_function GO:0004177; aminopeptidase activity; molecular_function}	{NA}	{NA}	{NA}	{YES}	{NA}	{PF01738:Dienelactone hydrolase family PF02129:X-Pro dipeptidyl-peptidase (S15 family) PF05577:Serine carboxypeptidase S28 PF02230:Phospholipase/Carboxylesterase PF00326:Prolyl oligopeptidase family}
A00271	{Contig10:4288903:4291845:+}	{KAG2142809.1; hypothetical protein EDB93DRAFT_1157849 [Suillus bovinus]}	{NA}	{NA}	{NA}	{NA}	{GO:0003682; chromatin binding; molecular_function}	{NA}	{NA}	{NA}	{NA}	{NA}	{PF00249:Myb-like DNA-binding domain}
A00272	{Contig10:4292358:4292895:-}	{KAG2142808.1; hypothetical protein EDB93DRAFT_1252270 [Suillus bovinus]}	{NA}	{aor:AO090003000342; }	{NA}	{NA}	{NA}	{NA}	{NA}	{NA}	{YES}	{NA}	{NA}
A00273	{Contig10:4293842:4294815:-}	{KAG2142807.1; hypothetical protein EDB93DRAFT_1338413 [Suillus bovinus]}	{NA}	{NA}	{NA}	{NA}	{NA}	{NA}	{NA}	{NA}	{NA}	{NA}	{NA}
A00274	{Contig10:4297746:4299379:-}	{KAG1870953.1; quinon protein alcohol dehydrogenase-like superfamily [Suillus tomentosus]}	{NA}	{NA}	{NA}	{NA}	{GO:0005515; protein binding; molecular_function}	{NA}	{NA}	{NA}	{NA}	{NA}	{PF00400:WD domain, G-beta repeat}
A00275	{Contig10:4300630:4302417:-}	{KAG1897731.1; kinase-like domain-containing protein [Suillus fuscotomentosus]}	{NA}	{NA}	{NA}	{NA}	{GO:0005515; protein binding; molecular_function GO:0016773; phosphotransferase activity, alcohol group as acceptor; molecular_function GO:0005524; ATP binding; molecular_function GO:0009103; lipopolysaccharide biosynthetic process; biological_process GO:0006468; protein phosphorylation; biological_process GO:0016020; membrane; cellular_component GO:0003824; NA GO:0004672; protein kinase activity…	{NA}	{NA}	{NA}	{NA}	{NA}	{PF07714:Protein tyrosine and serine/threonine kinase PF06293:Lipopolysaccharide kinase (Kdo/WaaP) family PF00069:Protein kinase domain PF00400:WD domain, G-beta repeat PF01163:RIO1 family}
A00276	{Contig10:4302675:4303808:+}	{KAG1722119.1; hypothetical protein EDB19DRAFT_1859489 [Suillus lakei]}	{NA}	{hir:HETIRDRAFT_108848; }	{NA}	{NA}	{NA}	{NA}	{NA}	{NA}	{NA}	{NA}	{NA}
A00277	{Contig10:4307740:4308417:-}	{KAG2340259.1; WD40 repeat-like protein [Suillus weaverae]}	{NA}	{NA}	{NA}	{NA}	{GO:0005515; protein binding; molecular_function}	{NA}	{NA}	{NA}	{NA}	{NA}	{PF00400:WD domain, G-beta repeat}
A00278	{Contig10:4310957:4314046:-}	{OJA17691.1; hypothetical protein AZE42_06706 [Rhizopogon vesiculosus]}	{O00092; 3-phytase A }	{lbc:LACBIDRAFT_239833; }	{NA}	{NA}	{GO:0003993; acid phosphatase activity; molecular_function}	{NA}	{NA}	{NA}	{NA}	{NA}	{PF00328:Histidine phosphatase superfamily (branch 2)}
A00279	{Contig10:4314663:4323158:+}	{KAG1803814.1; glycoside hydrolase family 13/glycosyltransferase family 5 protein [Suillus plorans]}	{Q9Y719; Cell wall alpha-1,3-glucan synthase mok13 }	{sla:SERLADRAFT_358809; K00749 E2.4.1.183 alpha-1,3-glucan synthase 2.4.1.183 }	{NA}	{NA}	{GO:0009058; biosynthetic process; biological_process GO:0043169; cation binding; molecular_function GO:0003824; NA GO:0005975; carbohydrate metabolic process; biological_process}	{PHI:2504__PHI:3903; NA}	{NA}	{NA}	{NA}	{QDK64594.1_; GH13_22 ; QDK64594.1_; GT5 UDP-Glc: glycogen glucosyltransferase (EC 2.4.1.11); ADP-Glc: starch glucosyltransferase (EC 2.4.1.21); NDP-Glc: starch glucosyltransferase (EC 2.4.1.242); UDP-Glc: alpha-1,3-glucan synthase (EC 2.4.1.183) UDP-Glc: alpha-1,4-glucan synthase (EC 2.4.1.-) -}	{PF00128:Alpha amylase, catalytic domain PF00534:Glycosyl transferases group 1}
A00280	{Contig10:530330:532149:-}	{KAG2134898.1; TIP49 C-terminus-domain-containing protein [Suillus bovinus]}	{P0CR27; RuvB-like helicase 1 }	{sla:SERLADRAFT_454348; K04499 RUVBL1, RVB1, INO80H RuvB-like protein 1 (pontin 52) -- Environmental Information Processing; Signal transduction; Wnt signaling pathway [PATH:ko04310]}	{Hs4506753; KOG1942 DNA helicase, TBP-interacting protein L Replication, recombination and repair ;}	{NA}	{GO:0016851; magnesium chelatase activity; molecular_function GO:0006355; regulation of transcription, DNA-dependent; biological_process GO:0009378; four-way junction helicase activity; molecular_function GO:0016301; kinase activity; molecular_function GO:0016887; ATPase activity; molecular_function GO:0006310; DNA recombination; biological_process GO:0006281; DNA repair; biological_process GO:00…	{NA}	{NA}	{NA}	{NA}	{NA}	{PF07728:AAA domain (dynein-related subfamily) PF00004:ATPase family associated with various cellular activities (AAA) PF01695:IstB-like ATP binding protein PF01078:Magnesium chelatase, subunit ChlI PF05496:Holliday junction DNA helicase RuvB P-loop domain PF00158:Sigma-54 interaction domain PF04851:Type III restriction enzyme, res subunit PF06414:Zeta toxin PF06068:TIP49 P-loop domain}
A00281	{Contig10:4323740:4324306:-}	{KAG2029422.1; hypothetical protein BDR03DRAFT_1096268 [Suillus americanus]}	{NA}	{gtr:GLOTRDRAFT_134349; }	{NA}	{NA}	{NA}	{NA}	{NA}	{NA}	{NA}	{NA}	{NA}
A00282	{Contig10:4324430:4325740:-}	{THG95219.1; hypothetical protein EW026_g6389 [Phlebia centrifuga]}	{NA}	{NA}	{NA}	{NA}	{NA}	{NA}	{NA}	{NA}	{NA}	{NA}	{NA}
A00283	{Contig10:4327828:4332060:+}	{KAG1838467.1; hypothetical protein F4604DRAFT_1941377 [Suillus subluteus]}	{NA}	{cput:CONPUDRAFT_50174; }	{NA}	{NA}	{GO:0006508; proteolysis; biological_process GO:0008234; cysteine-type peptidase activity; molecular_function}	{NA}	{NA}	{NA}	{NA}	{NA}	{PF02902:Ulp1 protease family, C-terminal catalytic domain}
A00284	{Contig10:4332999:4333877:-}	{KAG1878692.1; hypothetical protein C8R48DRAFT_554622, partial [Suillus tomentosus]}	{NA}	{NA}	{NA}	{NA}	{GO:0016020; membrane; cellular_component}	{NA}	{NA}	{NA}	{NA}	{NA}	{PF05887:Procyclic acidic repetitive protein (PARP)}
A00285	{Contig10:4334786:4338679:+}	{KAG2156680.1; hypothetical protein EDB93DRAFT_1101532 [Suillus bovinus]}	{NA}	{NA}	{NA}	{NA}	{NA}	{NA}	{NA}	{NA}	{NA}	{NA}	{NA}
A00286	{Contig10:4339212:4339805:-}	{KAG2144461.1; hypothetical protein DEU56DRAFT_754133, partial [Suillus clintonianus]}	{NA}	{gtr:GLOTRDRAFT_128509; }	{NA}	{NA}	{NA}	{NA}	{NA}	{NA}	{NA}	{NA}	{NA}
A00287	{Contig10:4340262:4340798:-}	{KAG2034919.1; hypothetical protein BDR03DRAFT_1001310 [Suillus americanus]}	{NA}	{NA}	{NA}	{NA}	{NA}	{NA}	{NA}	{NA}	{NA}	{NA}	{NA}
A00288	{Contig10:4341544:4343965:+}	{KAG1897731.1; kinase-like domain-containing protein [Suillus fuscotomentosus]}	{NA}	{NA}	{NA}	{NA}	{GO:0006468; protein phosphorylation; biological_process GO:0004672; protein kinase activity; molecular_function GO:0005524; ATP binding; molecular_function GO:0005515; protein binding; molecular_function}	{NA}	{NA}	{NA}	{NA}	{NA}	{PF00069:Protein kinase domain PF07714:Protein tyrosine and serine/threonine kinase PF00400:WD domain, G-beta repeat}
A00289	{Contig10:4349595:4350606:-}	{KAG2159035.1; hypothetical protein EDB93DRAFT_1053657, partial [Suillus bovinus]}	{NA}	{NA}	{NA}	{NA}	{NA}	{NA}	{NA}	{NA}	{NA}	{NA}	{NA}
A00290	{Contig10:4351695:4352027:+}	{KAG1797540.1; hypothetical protein EV424DRAFT_1546613 [Suillus variegatus]}	{NA}	{NA}	{NA}	{NA}	{NA}	{NA}	{NA}	{NA}	{NA}	{NA}	{NA}
A00291	{Contig10:532457:533806:-}	{KAG2134899.1; hypothetical protein EDB93DRAFT_1092518 [Suillus bovinus]}	{NA}	{lbc:LACBIDRAFT_303903; }	{NA}	{NA}	{GO:0051775; response to redox state; biological_process GO:0032040; small-subunit processome; cellular_component GO:0005737; cytoplasm; cellular_component GO:0045892; negative regulation of transcription, DNA-dependent; biological_process}	{NA}	{NA}	{NA}	{NA}	{NA}	{PF04147:Nop14-like family PF06971:Putative DNA-binding protein N-terminus}
A00292	{Contig10:4352219:4354673:+}	{KAG1797541.1; hypothetical protein EV424DRAFT_1546614 [Suillus variegatus]}	{NA}	{NA}	{NA}	{NA}	{NA}	{NA}	{NA}	{NA}	{NA}	{NA}	{NA}
A00293	{Contig10:4355320:4356842:-}	{KAG2142798.1; NUDIX hydrolase domain-like protein [Suillus bovinus]}	{NA}	{sla:SERLADRAFT_476673; }	{NA}	{NA}	{GO:0016787; hydrolase activity; molecular_function}	{NA}	{NA}	{NA}	{NA}	{NA}	{PF00293:NUDIX domain}
A00294	{Contig10:4357399:4367303:-}	{OJA16592.1; hypothetical protein AZE42_08510 [Rhizopogon vesiculosus]}	{NA}	{sla:SERLADRAFT_452568; K00698 CHS1 chitin synthase 2.4.1.16 Metabolism; Carbohydrate metabolism; Amino sugar and nucleotide sugar metabolism [PATH:ko00520]}	{NA}	{NA}	{GO:0006886; intracellular protein transport; biological_process GO:0016757; transferase activity, transferring glycosyl groups; molecular_function GO:0020037; heme binding; molecular_function GO:0016459; myosin complex; cellular_component GO:0003774; motor activity; molecular_function GO:0016192; vesicle-mediated transport; biological_process GO:0030117; membrane coat; cellular_component GO:0005…	{PHI:389__PHI:1116; NA}	{NA}	{NA}	{NA}	{NA}	{PF13506:Glycosyl transferase family 21 PF00400:WD domain, G-beta repeat PF04053:Coatomer WD associated region PF00173:Cytochrome b5-like Heme/Steroid binding domain PF00063:Myosin head (motor domain)}
A00295	{Contig10:4369817:4373279:+}	{KAG2055055.1; hypothetical protein BDR06DRAFT_354628 [Suillus hirtellus]}	{NA}	{cput:CONPUDRAFT_168992; }	{NA}	{NA}	{NA}	{NA}	{NA}	{NA}	{NA}	{NA}	{NA}
A00296	{Contig10:4373943:4375919:-}	{KAG2142792.1; hypothetical protein EDB93DRAFT_1105456 [Suillus bovinus]}	{NA}	{shs:STEHIDRAFT_125778; }	{NA}	{NA}	{NA}	{NA}	{NA}	{NA}	{NA}	{NA}	{NA}
A00297	{Contig10:4376381:4376880:-}	{KAG2142791.1; kinase-like domain-containing protein [Suillus bovinus]}	{NA}	{NA}	{NA}	{NA}	{GO:0005524; ATP binding; molecular_function GO:0006468; protein phosphorylation; biological_process GO:0004672; protein kinase activity; molecular_function}	{NA}	{NA}	{NA}	{NA}	{NA}	{PF07714:Protein tyrosine and serine/threonine kinase PF00069:Protein kinase domain}
A00298	{Contig10:4380188:4386175:-}	{XP_027619707.1; Transposon Tf2-6 polyprotein [Sparassis crispa]}	{NA}	{mrr:Moror_2377; }	{NA}	{NA}	{GO:0003676; nucleic acid binding; molecular_function GO:0003723; RNA binding; molecular_function GO:0015074; DNA integration; biological_process GO:0003964; RNA-directed DNA polymerase activity; molecular_function GO:0008270; zinc ion binding; molecular_function GO:0006278; RNA-dependent DNA replication; biological_process}	{NA}	{NA}	{NA}	{NA}	{NA}	{PF00098:Zinc knuckle PF00665:Integrase core domain PF00078:Reverse transcriptase (RNA-dependent DNA polymerase)}
A00299	{Contig10:4386943:4388358:+}	{KAG2142771.1; kinase-like domain-containing protein, partial [Suillus bovinus]}	{NA}	{sla:SERLADRAFT_438301; }	{NA}	{NA}	{GO:0006468; protein phosphorylation; biological_process GO:0003824; NA GO:0004672; protein kinase activity; molecular_function GO:0005524; ATP binding; molecular_function}	{NA}	{NA}	{NA}	{NA}	{NA}	{PF00069:Protein kinase domain PF07714:Protein tyrosine and serine/threonine kinase PF01163:RIO1 family}
A00300	{Contig10:4389576:4397458:-}	{KAG2142789.1; kinase-like domain-containing protein [Suillus bovinus]}	{NA}	{NA}	{NA}	{NA}	{GO:0005524; ATP binding; molecular_function GO:0004672; protein kinase activity; molecular_function GO:0006468; protein phosphorylation; biological_process}	{NA}	{NA}	{NA}	{NA}	{NA}	{PF07714:Protein tyrosine and serine/threonine kinase PF00069:Protein kinase domain}
A00301	{Contig10:4399638:4400252:+}	{KAG2142782.1; ribosomal protein L25/Gln-tRNA synthetase [Suillus bovinus]}	{NA}	{mpr:MPER_05944; K01886 QARS, glnS glutaminyl-tRNA synthetase 6.1.1.18 Genetic Information Processing; Translation; Aminoacyl-tRNA biosynthesis [PATH:ko00970] Metabolism; Global and overview maps; Metabolic pathways [PATH:ko01100]}	{NA}	{NA}	{GO:0000166; nucleotide binding; molecular_function GO:0005524; ATP binding; molecular_function GO:0004812; aminoacyl-tRNA ligase activity; molecular_function GO:0006418; tRNA aminoacylation for protein translation; biological_process GO:0005737; cytoplasm; cellular_component}	{NA}	{NA}	{NA}	{NA}	{NA}	{PF03950:tRNA synthetases class I (E and Q), anti-codon binding domain}
A00302	{Contig10:539945:540498:-}	{NA}	{NA}	{NA}	{NA}	{NA}	{NA}	{NA}	{NA}	{NA}	{NA}	{NA}	{NA}
A00303	{Contig10:4402633:4403256:-}	{THH08020.1; hypothetical protein EW146_g9124 [Bondarzewia mesenterica]}	{NA}	{mrr:Moror_14764; }	{NA}	{NA}	{GO:0015074; DNA integration; biological_process}	{NA}	{NA}	{NA}	{NA}	{NA}	{PF00665:Integrase core domain}
A00304	{Contig10:4406547:4408148:-}	{KAG1818236.1; hypothetical protein EV424DRAFT_1540174 [Suillus variegatus]}	{NA}	{NA}	{NA}	{NA}	{NA}	{NA}	{NA}	{NA}	{NA}	{NA}	{NA}
A00305	{Contig10:4414385:4415063:-}	{OJA11827.1; hypothetical protein AZE42_11404 [Rhizopogon vesiculosus]}	{NA}	{mrr:Moror_12940; }	{NA}	{NA}	{NA}	{NA}	{NA}	{NA}	{NA}	{NA}	{NA}
A00306	{Contig10:4415981:4417582:+}	{KAG1758413.1; hypothetical protein EDD22DRAFT_956894 [Suillus occidentalis]}	{NA}	{NA}	{NA}	{NA}	{GO:0008270; zinc ion binding; molecular_function GO:0003677; DNA binding; molecular_function GO:0015074; DNA integration; biological_process GO:0003676; nucleic acid binding; molecular_function}	{NA}	{NA}	{NA}	{NA}	{NA}	{PF00098:Zinc knuckle PF13495:Phage integrase, N-terminal SAM-like domain}
A00307	{Contig10:4418857:4419267:+}	{KIK77609.1; hypothetical protein PAXRUDRAFT_17389 [Paxillus rubicundulus Ve08.2h10]}	{NA}	{gtr:GLOTRDRAFT_33846; }	{NA}	{NA}	{NA}	{NA}	{NA}	{NA}	{NA}	{NA}	{NA}
A00308	{Contig10:4420613:4423305:-}	{XP_027611901.1; Transposon Tf2-6 polyprotein [Sparassis crispa]}	{NA}	{mpr:MPER_13203; }	{NA}	{NA}	{GO:0003723; RNA binding; molecular_function GO:0003964; RNA-directed DNA polymerase activity; molecular_function GO:0006278; RNA-dependent DNA replication; biological_process}	{NA}	{NA}	{NA}	{NA}	{NA}	{PF00078:Reverse transcriptase (RNA-dependent DNA polymerase)}
A00309	{Contig10:4423462:4423872:-}	{KIK77609.1; hypothetical protein PAXRUDRAFT_17389 [Paxillus rubicundulus Ve08.2h10]}	{NA}	{gtr:GLOTRDRAFT_33846; }	{NA}	{NA}	{NA}	{NA}	{NA}	{NA}	{NA}	{NA}	{NA}
A00310	{Contig10:4433388:4433699:+}	{KAG2146035.1; hypothetical protein EDB93DRAFT_1104638 [Suillus bovinus]}	{NA}	{NA}	{NA}	{NA}	{NA}	{NA}	{NA}	{NA}	{NA}	{NA}	{NA}
A00311	{Contig10:4436469:4436840:-}	{KAG1738756.1; hypothetical protein EDB19DRAFT_1982320 [Suillus lakei]}	{NA}	{NA}	{NA}	{NA}	{NA}	{NA}	{NA}	{NA}	{NA}	{NA}	{NA}
A00312	{Contig10:4437419:4441311:+}	{KAG1795254.1; hypothetical protein EV424DRAFT_1599477 [Suillus variegatus]}	{NA}	{NA}	{NA}	{NA}	{NA}	{NA}	{NA}	{NA}	{NA}	{NA}	{NA}
A00313	{Contig10:543971:546213:+}	{KAG2134902.1; cytochrome P450 [Suillus bovinus]}	{NA}	{sla:SERLADRAFT_449580; }	{NA}	{NA}	{GO:0016705; oxidoreductase activity, acting on paired donors, with incorporation or reduction of molecular oxygen; molecular_function GO:0005506; iron ion binding; molecular_function GO:0020037; heme binding; molecular_function GO:0055114; oxidation-reduction process; biological_process}	{NA}	{NA}	{Serla_S7_9.estExt_fgenesh2_pm.C_70674; E-classP450,groupI P450_Sl7.9010 http://p450.riceblast.snu.ac.kr/class.php?a=dv_sequence&id=46755&spe_id=393761&ref_id=61913}	{NA}	{NA}	{PF00067:Cytochrome P450}
A00314	{Contig10:4441369:4443861:+}	{TFY76788.1; hypothetical protein EWM64_g7225 [Hericium alpestre]}	{NA}	{adl:AURDEDRAFT_67135; }	{NA}	{NA}	{GO:0003723; RNA binding; molecular_function GO:0015074; DNA integration; biological_process GO:0003964; RNA-directed DNA polymerase activity; molecular_function GO:0006278; RNA-dependent DNA replication; biological_process}	{NA}	{NA}	{NA}	{NA}	{NA}	{PF00078:Reverse transcriptase (RNA-dependent DNA polymerase) PF00665:Integrase core domain}
A00315	{Contig10:4445143:4446106:-}	{KAG2142772.1; kinase-like domain-containing protein [Suillus bovinus]}	{NA}	{NA}	{NA}	{NA}	{GO:0016773; phosphotransferase activity, alcohol group as acceptor; molecular_function GO:0005524; ATP binding; molecular_function GO:0016020; membrane; cellular_component GO:0006468; protein phosphorylation; biological_process GO:0003824; NA GO:0009103; lipopolysaccharide biosynthetic process; biological_process GO:0004672; protein kinase activity; molecular_function}	{NA}	{NA}	{NA}	{NA}	{NA}	{PF01163:RIO1 family PF00069:Protein kinase domain PF07714:Protein tyrosine and serine/threonine kinase PF06293:Lipopolysaccharide kinase (Kdo/WaaP) family}
A00316	{Contig10:4449221:4450780:+}	{KAG2142771.1; kinase-like domain-containing protein, partial [Suillus bovinus]}	{NA}	{NA}	{NA}	{NA}	{GO:0004672; protein kinase activity; molecular_function GO:0009103; lipopolysaccharide biosynthetic process; biological_process GO:0003824; NA GO:0006468; protein phosphorylation; biological_process GO:0016020; membrane; cellular_component GO:0016773; phosphotransferase activity, alcohol group as acceptor; molecular_function GO:0005524; ATP binding; molecular_function}	{NA}	{NA}	{NA}	{NA}	{NA}	{PF01163:RIO1 family PF00069:Protein kinase domain PF07714:Protein tyrosine and serine/threonine kinase PF06293:Lipopolysaccharide kinase (Kdo/WaaP) family}
A00317	{Contig10:4452589:4457778:-}	{KIK48611.1; hypothetical protein CY34DRAFT_798129 [Suillus luteus UH-Slu-Lm8-n1]}	{NA}	{NA}	{NA}	{NA}	{GO:0005524; ATP binding; molecular_function GO:0019079; viral genome replication; biological_process GO:0043531; ADP binding; molecular_function GO:0005515; protein binding; molecular_function}	{NA}	{NA}	{NA}	{NA}	{NA}	{PF00931:NB-ARC domain PF00400:WD domain, G-beta repeat PF01057:Parvovirus non-structural protein NS1 PF00004:ATPase family associated with various cellular activities (AAA)}
A00318	{Contig10:4459358:4460228:+}	{KAG2142768.1; hypothetical protein EDB93DRAFT_1157614 [Suillus bovinus]}	{NA}	{NA}	{NA}	{NA}	{GO:0006260; DNA replication; biological_process GO:0005664; nuclear origin of replication recognition complex; cellular_component GO:0003677; DNA binding; molecular_function}	{NA}	{NA}	{NA}	{YES}	{NA}	{PF05460:Origin recognition complex subunit 6 (ORC6)}
A00319	{Contig10:4460958:4465059:-}	{KAG1753115.1; hypothetical protein EDD22DRAFT_972470 [Suillus occidentalis]}	{NA}	{NA}	{NA}	{NA}	{NA}	{NA}	{NA}	{NA}	{NA}	{NA}	{NA}
A00320	{Contig10:4466732:4467172:+}	{KAG2118283.1; hypothetical protein BD769DRAFT_1390749 [Suillus cothurnatus]}	{NA}	{NA}	{NA}	{NA}	{NA}	{NA}	{NA}	{NA}	{NA}	{NA}	{NA}
A00321	{Contig10:4467236:4467982:+}	{KAG2153621.1; hypothetical protein EDB93DRAFT_1135828 [Suillus bovinus]}	{NA}	{NA}	{NA}	{NA}	{NA}	{NA}	{NA}	{NA}	{NA}	{NA}	{NA}
A00322	{Contig10:4470175:4470966:+}	{KAG2130674.1; hypothetical protein EDB93DRAFT_1094774 [Suillus bovinus]}	{NA}	{mpr:MPER_03581; }	{NA}	{NA}	{GO:0003723; RNA binding; molecular_function GO:0003964; RNA-directed DNA polymerase activity; molecular_function GO:0006278; RNA-dependent DNA replication; biological_process}	{NA}	{NA}	{NA}	{NA}	{NA}	{PF00078:Reverse transcriptase (RNA-dependent DNA polymerase)}
A00323	{Contig10:4474461:4475061:+}	{KAG2142765.1; hypothetical protein EDB93DRAFT_603338 [Suillus bovinus]}	{NA}	{NA}	{NA}	{NA}	{NA}	{NA}	{NA}	{NA}	{NA}	{NA}	{NA}
A00324	{Contig10:547132:549615:+}	{KAG2134902.1; cytochrome P450 [Suillus bovinus]}	{NA}	{sla:SERLADRAFT_449580; }	{NA}	{NA}	{GO:0020037; heme binding; molecular_function GO:0055114; oxidation-reduction process; biological_process GO:0005506; iron ion binding; molecular_function GO:0016705; oxidoreductase activity, acting on paired donors, with incorporation or reduction of molecular oxygen; molecular_function}	{NA}	{NA}	{Serla_S7_9.estExt_fgenesh2_pm.C_70674; E-classP450,groupI P450_Sl7.9010 http://p450.riceblast.snu.ac.kr/class.php?a=dv_sequence&id=46755&spe_id=393761&ref_id=61913}	{NA}	{NA}	{PF00067:Cytochrome P450}
A00325	{Contig10:4475555:4479640:-}	{KAG1789609.1; hypothetical protein HD556DRAFT_1446834 [Suillus plorans]}	{NA}	{NA}	{NA}	{NA}	{GO:0008270; zinc ion binding; molecular_function}	{NA}	{NA}	{NA}	{NA}	{NA}	{PF00569:Zinc finger, ZZ type}
A00326	{Contig10:4482231:4483628:-}	{KAG2142762.1; hypothetical protein EDB93DRAFT_603119 [Suillus bovinus]}	{NA}	{NA}	{NA}	{NA}	{NA}	{NA}	{NA}	{NA}	{NA}	{NA}	{NA}
A00327	{Contig10:4487964:4488398:-}	{KAG2142761.1; hypothetical protein EDB93DRAFT_1088691 [Suillus bovinus]}	{NA}	{sla:SERLADRAFT_462516; }	{NA}	{NA}	{NA}	{NA}	{NA}	{NA}	{NA}	{NA}	{NA}
A00328	{Contig10:4492327:4493617:-}	{KAG2142759.1; hypothetical protein EDB93DRAFT_1105431 [Suillus bovinus]}	{NA}	{NA}	{NA}	{NA}	{GO:0005515; protein binding; molecular_function}	{NA}	{NA}	{NA}	{NA}	{NA}	{PF00646:F-box domain}
A00329	{Contig10:4495297:4497208:-}	{KAG2142758.1; hypothetical protein EDB93DRAFT_602776 [Suillus bovinus]}	{P56517; Histone deacetylase 1 }	{sla:SERLADRAFT_452574; K06067 HDAC1_2 histone deacetylase 1/2 3.5.1.98 Cellular Processes; Cell growth and death; Cell cycle [PATH:ko04110] Organismal Systems; Aging; Longevity regulating pathway - multiple species [PATH:ko04213] Environmental Information Processing; Signal transduction; Notch signaling pathway [PATH:ko04330] Organismal Systems; Endocrine system; Thyroid hormone signaling pathwa…	{SPBC36.05c; KOG1342 Histone deacetylase complex, catalytic component RPD3 B Chromatin structure and dynamics ;}	{NA}	{NA}	{PHI:9899; Q4WI19 RpdA (Afu2g03390) 746128 Aspergillus fumigatus pulmonary aspergillosis Mus musculus (related: house mouse) Lysine deacetylase Promoter mutation loss of pathogenicity}	{Q8TG10_USTMD; HDA1 AAM15960.1 569 Ustilago maydis 5270 CATALYTIC ACTIVITY: Hydrolysis of an N(6)-acetyl-lysine residue of a histone to yield a deacetylated histone.; SUBCELLULAR LOCATION: Nucleus (By similarity).; SIMILARITY: Belongs to the histone deacetylase family. HD Type 1 subfamily. 12421320 Unknown {ID:PF00850; Description: Hist_deacetyl} Euchlaena spp., Zea spp. (Poaceae) herb Smut. Corn…	{NA}	{NA}	{NA}	{NA}
A00330	{Contig10:4498064:4499613:+}	{KAG2142757.1; protein-tyrosine phosphatase-like protein [Suillus bovinus]}	{NA}	{sla:SERLADRAFT_456923; K14819 DUSP12, YVH1 dual specificity phosphatase 12 3.1.3.16 3.1.3.48 }	{NA}	{NA}	{GO:0008138; protein tyrosine/serine/threonine phosphatase activity; molecular_function GO:0004725; protein tyrosine phosphatase activity; molecular_function GO:0016763; transferase activity, transferring pentosyl groups; molecular_function GO:0006470; protein dephosphorylation; biological_process}	{NA}	{NA}	{NA}	{NA}	{NA}	{PF00782:Dual specificity phosphatase, catalytic domain PF04179:Rit1 DUSP-like domain PF00102:Protein-tyrosine phosphatase}
A00331	{Contig10:4504682:4504927:+}	{KAG2339358.1; hypothetical protein BDR05DRAFT_968099 [Suillus weaverae]}	{NA}	{NA}	{NA}	{NA}	{NA}	{NA}	{NA}	{NA}	{NA}	{NA}	{NA}
A00332	{Contig10:4504950:4508502:-}	{OJA15079.1; hypothetical protein AZE42_06935 [Rhizopogon vesiculosus]}	{Q6IP91; Serine/threonine-protein phosphatase 4 catalytic subunit }	{cput:CONPUDRAFT_85031; K15423 PPP4C serine/threonine-protein phosphatase 4 catalytic subunit 3.1.3.16 Organismal Systems; Endocrine system; Glucagon signaling pathway [PATH:ko04922]}	{At4g26720; KOG0372 Serine/threonine specific protein phosphatase involved in glycogen accumulation, PP2A-related GT Carbohydrate transport and metabolism ; Signal transduction mechanisms ;}	{NA}	{GO:0016787; hydrolase activity; molecular_function GO:0046872; metal ion binding; molecular_function}	{PHI:9226__PHI:9543; NA}	{Q59KY8_CANAL; SIT4 EAK91146.1 314 Candida albicans 5476 CATALYTIC ACTIVITY: A phosphoprotein + H(2)O = a protein + phosphate.; SIMILARITY: Belongs to the PPP phosphatase family.; CAUTION: The sequence shown here is derived from an EMBL/GenBank/DDBJ whole genome shotgun (WGS) entry which is preliminary data. 15123810 XP_710408.1, XM_705316.1, XP_710419.1, XM_705327.1 {ID:PF00149; Description: Met…	{NA}	{NA}	{NA}	{PF00149:Calcineurin-like phosphoesterase PF00096:Zinc finger, C2H2 type}
A00333	{Contig10:4511694:4512704:-}	{KAG2142753.1; 60S ribosomal protein L10A [Suillus bovinus]}	{O74836; 60S ribosomal protein L1-B }	{cput:CONPUDRAFT_95824; K02865 RP-L10Ae, RPL10A large subunit ribosomal protein L10Ae -- Genetic Information Processing; Translation; Ribosome [PATH:ko03010]}	{SPCC1183.08c; KOG1570 60S ribosomal protein L10A J Translation, ribosomal structure and biogenesis ;}	{NA}	{NA}	{NA}	{NA}	{NA}	{NA}	{NA}	{NA}
A00334	{Contig10:4513196:4515858:+}	{KAG2339362.1; hypothetical protein BDR05DRAFT_968106 [Suillus weaverae]}	{NA}	{hir:HETIRDRAFT_457857; }	{NA}	{NA}	{NA}	{NA}	{NA}	{NA}	{NA}	{NA}	{NA}
A00335	{Contig10:70202:71779:+}	{KAG2127576.1; hypothetical protein EDB93DRAFT_1256973 [Suillus bovinus]}	{NA}	{NA}	{NA}	{NA}	{GO:0006355; regulation of transcription, DNA-dependent; biological_process GO:0005515; protein binding; molecular_function}	{NA}	{NA}	{NA}	{NA}	{NA}	{PF08007:Cupin superfamily protein PF02311:AraC-like ligand binding domain}
A00336	{Contig10:550954:552507:-}	{KAG1764284.1; hypothetical protein EV702DRAFT_982119, partial [Suillus placidus]}	{NA}	{sla:SERLADRAFT_436820; }	{NA}	{NA}	{GO:0019031; viral envelope; cellular_component}	{NA}	{NA}	{NA}	{NA}	{NA}	{PF03286:Pox virus Ag35 surface protein}
A00337	{Contig10:4516391:4517581:+}	{KAG1789607.1; hypothetical protein HD556DRAFT_1296659, partial [Suillus plorans]}	{NA}	{NA}	{NA}	{NA}	{GO:0016491; oxidoreductase activity; molecular_function GO:0055114; oxidation-reduction process; biological_process GO:0016706; oxidoreductase activity, acting on paired donors, with incorporation or reduction of molecular oxygen, 2-oxoglutarate as one donor, and incorporation of one atom each of oxygen into both donors; molecular_function}	{NA}	{NA}	{NA}	{NA}	{NA}	{PF13640:2OG-Fe(II) oxygenase superfamily}
A00338	{Contig10:4518464:4536008:+}	{NA}	{NA}	{NA}	{NA}	{NA}	{NA}	{NA}	{NA}	{NA}	{NA}	{NA}	{NA}
A00339	{Contig10:4537467:4539900:-}	{KAG2142748.1; amino acid permease-domain-containing protein [Suillus bovinus]}	{P25737; Lysine-specific permease }	{sla:SERLADRAFT_491579; }	{NA}	{gnl|TC-DB|P25737; 2.A.3.1.2 Lysine-specific permease - Escherichia coli.}	{GO:0006810; transport; biological_process GO:0016020; membrane; cellular_component GO:0015171; amino acid transmembrane transporter activity; molecular_function GO:0055085; transmembrane transport; biological_process GO:0003333; amino acid transmembrane transport; biological_process}	{NA}	{NA}	{NA}	{NA}	{NA}	{PF13520:Amino acid permease PF00324:Amino acid permease}
A00340	{Contig10:4540816:4546257:-}	{KAG2142746.1; lysophospholipase [Suillus bovinus]}	{NA}	{sla:SERLADRAFT_360527; K13333 PLB lysophospholipase 3.1.1.5 Metabolism; Lipid metabolism; Glycerophospholipid metabolism [PATH:ko00564]}	{NA}	{NA}	{GO:0004620; phospholipase activity; molecular_function GO:0005506; iron ion binding; molecular_function GO:0055114; oxidation-reduction process; biological_process GO:0020037; heme binding; molecular_function GO:0009395; phospholipid catabolic process; biological_process GO:0016705; oxidoreductase activity, acting on paired donors, with incorporation or reduction of molecular oxygen; molecular_f…	{NA}	{NA}	{estExt_Genewise1.C_4_t50472; E-classP450,groupI P450_Sl7.9071 http://p450.riceblast.snu.ac.kr/class.php?a=dv_sequence&id=46816&spe_id=393761&ref_id=61913}	{NA}	{NA}	{PF00067:Cytochrome P450 PF01735:Lysophospholipase catalytic domain}
A00341	{Contig10:4549420:4552417:-}	{KIL55008.1; hypothetical protein M378DRAFT_201131 [Amanita muscaria Koide BX008]}	{NA}	{mrr:Moror_608; }	{NA}	{NA}	{GO:0046983; protein dimerization activity; molecular_function}	{NA}	{NA}	{NA}	{NA}	{NA}	{PF05699:hAT family C-terminal dimerisation region}
A00342	{Contig10:4552493:4552831:-}	{KAG1744839.1; hypothetical protein EDB19DRAFT_1826969 [Suillus lakei]}	{NA}	{NA}	{NA}	{NA}	{NA}	{NA}	{NA}	{NA}	{NA}	{NA}	{NA}
A00343	{Contig10:4553530:4554008:+}	{KAG2142741.1; hypothetical protein EDB93DRAFT_1157313 [Suillus bovinus]}	{NA}	{sla:SERLADRAFT_386457; K11567 DAD2, HSK1 DASH complex subunit DAD2 -- }	{NA}	{NA}	{GO:0007067; mitosis; biological_process GO:0042729; DASH complex; cellular_component GO:0072686; mitotic spindle; cellular_component}	{NA}	{NA}	{NA}	{NA}	{NA}	{PF08654:DASH complex subunit Dad2}
A00344	{Contig10:4554521:4557831:+}	{KAG2142740.1; hypothetical protein EDB93DRAFT_601216 [Suillus bovinus]}	{NA}	{sla:SERLADRAFT_436901; K08876 SCYL1 SCY1-like protein 1 -- }	{NA}	{NA}	{GO:0006468; protein phosphorylation; biological_process GO:0004672; protein kinase activity; molecular_function GO:0005524; ATP binding; molecular_function GO:0005515; protein binding; molecular_function}	{NA}	{NA}	{NA}	{NA}	{NA}	{PF00069:Protein kinase domain PF07714:Protein tyrosine and serine/threonine kinase PF02985:HEAT repeat}
A00345	{Contig10:4558110:4559773:-}	{KAG2142739.1; hypothetical protein EDB93DRAFT_601235 [Suillus bovinus]}	{NA}	{NA}	{NA}	{NA}	{GO:0005515; protein binding; molecular_function}	{NA}	{NA}	{NA}	{NA}	{NA}	{PF00646:F-box domain}
A00346	{Contig10:4560530:4560922:+}	{NA}	{NA}	{NA}	{NA}	{NA}	{NA}	{NA}	{NA}	{NA}	{NA}	{NA}	{NA}
A00347	{Contig10:553855:555048:+}	{KAG2348489.1; hypothetical protein BDR05DRAFT_995869 [Suillus weaverae]}	{NA}	{NA}	{NA}	{NA}	{GO:0019385; methanogenesis, from acetate; biological_process}	{NA}	{NA}	{NA}	{NA}	{NA}	{PF02552:CO dehydrogenase beta subunit/acetyl-CoA synthase epsilon subunit}
A00348	{Contig10:4560953:4563486:+}	{NA}	{NA}	{NA}	{NA}	{NA}	{GO:0005515; protein binding; molecular_function}	{NA}	{NA}	{NA}	{NA}	{NA}	{PF00400:WD domain, G-beta repeat}
A00349	{Contig10:4564603:4569888:+}	{KAG1897654.1; hypothetical protein F5891DRAFT_1149197 [Suillus fuscotomentosus]}	{NA}	{NA}	{NA}	{NA}	{GO:0003723; RNA binding; molecular_function GO:0000103; sulfate assimilation; biological_process GO:0003724; RNA helicase activity; molecular_function GO:0005515; protein binding; molecular_function GO:0043531; ADP binding; molecular_function GO:0004020; adenylylsulfate kinase activity; molecular_function GO:0005524; ATP binding; molecular_function}	{NA}	{NA}	{NA}	{NA}	{NA}	{PF01583:Adenylylsulphate kinase PF00004:ATPase family associated with various cellular activities (AAA) PF00931:NB-ARC domain PF00400:WD domain, G-beta repeat PF00910:RNA helicase}
A00350	{Contig10:4570645:4572893:-}	{KAG2142736.1; P-loop containing nucleoside triphosphate hydrolase protein [Suillus bovinus]}	{O42943; Uncharacterized ABC transporter ATP-binding protein C16H5.08c }	{cput:CONPUDRAFT_111516; K06185 ABCF2 ATP-binding cassette, subfamily F, member 2 -- }	{SPBC16H5.08c; KOG0927 Predicted transporter (ABC superfamily) R General function prediction only ;}	{gnl|TC-DB|Q9FJH6; 3.A.1.121.10 ABC transporter F family member 1 OS=Arabidopsis thaliana OX=3702 GN=ABCF1 PE=2 SV=1}	{GO:0000166; nucleotide binding; molecular_function GO:0051301; cell division; biological_process GO:0003924; GTPase activity; molecular_function GO:0031683; G-protein beta/gamma-subunit complex binding; molecular_function GO:0003677; DNA binding; molecular_function GO:0009295; nucleoid; cellular_component GO:0005525; GTP binding; molecular_function GO:0019001; guanyl nucleotide binding; molecula…	{NA}	{NA}	{NA}	{NA}	{NA}	{PF00503:G-protein alpha subunit PF00006:ATP synthase alpha/beta family, nucleotide-binding domain PF01926:50S ribosome-binding GTPase PF01580:FtsK/SpoIIIE family PF04977:Septum formation initiator PF00005:ABC transporter PF04310:MukB N-terminal PF03193:RsgA GTPase PF00350:Dynamin family}
A00351	{Contig10:4575566:4576368:+}	{KAG2142735.1; eukaryotic translation initiation factor 1-like protein [Suillus bovinus]}	{A1DAY1; Translation machinery-associated protein 22 }	{sla:SERLADRAFT_480368; }	{SPBC16C6.05; KOG3239 Density-regulated protein related to translation initiation factor 1 (eIF-1/SUI1) R General function prediction only ;}	{NA}	{GO:0003743; translation initiation factor activity; molecular_function GO:0006413; translational initiation; biological_process}	{NA}	{NA}	{NA}	{NA}	{NA}	{PF01253:Translation initiation factor SUI1}
A00352	{Contig10:4576910:4577645:+}	{KAG2142734.1; hypothetical protein EDB93DRAFT_1157268 [Suillus bovinus]}	{NA}	{sla:SERLADRAFT_414216; }	{NA}	{NA}	{NA}	{NA}	{NA}	{NA}	{NA}	{NA}	{NA}
A00353	{Contig10:4578449:4582020:+}	{KAG2142733.1; 1-phosphatidylinositol-4,5-bisphosphate phosphodiesterase 1 [Suillus bovinus]}	{NA}	{dsq:DICSQDRAFT_64218; K05857 PLCD phosphatidylinositol phospholipase C, delta 3.1.4.11 Metabolism; Carbohydrate metabolism; Inositol phosphate metabolism [PATH:ko00562] Metabolism; Global and overview maps; Metabolic pathways [PATH:ko01100] Environmental Information Processing; Signal transduction; Calcium signaling pathway [PATH:ko04020] Environmental Information Processing; Signal transduction…	{NA}	{NA}	{GO:0007165; signal transduction; biological_process GO:0005509; calcium ion binding; molecular_function GO:0006629; lipid metabolic process; biological_process GO:0004435; phosphatidylinositol phospholipase C activity; molecular_function GO:0035556; intracellular signal transduction; biological_process GO:0005515; protein binding; molecular_function}	{NA}	{NA}	{NA}	{NA}	{NA}	{PF13499:EF-hand domain pair PF13405:EF-hand domain PF00168:C2 domain PF00387:Phosphatidylinositol-specific phospholipase C, Y domain PF00036:EF hand}
A00354	{Contig10:4582281:4584113:-}	{KAG2142732.1; hypothetical protein EDB93DRAFT_1157259 [Suillus bovinus]}	{NA}	{abp:AGABI1DRAFT75673; }	{NA}	{NA}	{NA}	{NA}	{NA}	{NA}	{NA}	{NA}	{NA}
A00355	{Contig10:4586112:4586946:+}	{KAG2122662.1; hypothetical protein BD769DRAFT_1360407 [Suillus cothurnatus]}	{NA}	{hir:HETIRDRAFT_326088; }	{NA}	{NA}	{NA}	{NA}	{NA}	{NA}	{NA}	{NA}	{NA}
A00356	{Contig10:4587177:4587969:-}	{KAG2128916.1; hypothetical protein EDB93DRAFT_1267254 [Suillus bovinus]}	{NA}	{NA}	{NA}	{NA}	{NA}	{NA}	{NA}	{NA}	{NA}	{NA}	{NA}
A00357	{Contig10:4588903:4589443:-}	{KAG2139855.1; hypothetical protein EDB93DRAFT_1330226 [Suillus bovinus]}	{NA}	{NA}	{NA}	{NA}	{NA}	{NA}	{NA}	{NA}	{NA}	{NA}	{NA}
A00358	{Contig10:555076:557412:+}	{KAG1902002.1; hypothetical protein F5891DRAFT_1187029 [Suillus fuscotomentosus]}	{NA}	{NA}	{NA}	{NA}	{NA}	{NA}	{NA}	{NA}	{NA}	{NA}	{NA}
A00359	{Contig10:4589922:4591086:-}	{KAG2339376.1; hypothetical protein BDR05DRAFT_968123 [Suillus weaverae]}	{NA}	{sla:SERLADRAFT_462522; }	{NA}	{NA}	{NA}	{NA}	{NA}	{NA}	{NA}	{NA}	{NA}
A00360	{Contig10:4605500:4606621:+}	{KAG2103161.1; hypothetical protein BD769DRAFT_1696165, partial [Suillus cothurnatus]}	{NA}	{pco:PHACADRAFT_189482; }	{NA}	{NA}	{GO:0006281; DNA repair; biological_process GO:0043531; ADP binding; molecular_function GO:0003678; DNA helicase activity; molecular_function GO:0000723; telomere maintenance; biological_process}	{NA}	{NA}	{NA}	{NA}	{NA}	{PF00931:NB-ARC domain PF05970:PIF1-like helicase}
A00361	{Contig10:4612026:4612471:+}	{NA}	{NA}	{NA}	{NA}	{NA}	{GO:0005634; nucleus; cellular_component GO:0008270; zinc ion binding; molecular_function}	{NA}	{NA}	{NA}	{NA}	{NA}	{PF06524:NOA36 protein}
A00362	{Contig10:4612771:4614154:+}	{KAG2126262.1; hypothetical protein EDB93DRAFT_1257637 [Suillus bovinus]}	{NA}	{NA}	{NA}	{NA}	{NA}	{NA}	{NA}	{NA}	{NA}	{NA}	{NA}
A00363	{Contig10:4614657:4617460:-}	{XP_007318734.1; hypothetical protein SERLADRAFT_438331 [Serpula lacrymans var. lacrymans S7.9]}	{NA}	{sla:SERLADRAFT_438331; }	{NA}	{NA}	{GO:0016021; integral to membrane; cellular_component GO:0003676; nucleic acid binding; molecular_function GO:0007049; cell cycle; biological_process}	{NA}	{NA}	{NA}	{NA}	{NA}	{PF02037:SAP domain PF04977:Septum formation initiator PF03184:DDE superfamily endonuclease PF09726:Macoilin family}
A00364	{Contig10:4619368:4621100:-}	{KAG2126263.1; hypothetical protein EDB93DRAFT_1257638 [Suillus bovinus]}	{NA}	{NA}	{NA}	{NA}	{NA}	{NA}	{NA}	{NA}	{NA}	{NA}	{NA}
A00365	{Contig10:4621543:4622693:+}	{KAG2126264.1; hypothetical protein EDB93DRAFT_1257639 [Suillus bovinus]}	{NA}	{cput:CONPUDRAFT_61637; }	{NA}	{NA}	{NA}	{NA}	{NA}	{NA}	{NA}	{NA}	{NA}
A00366	{Contig10:4622744:4632447:-}	{KAG2741397.1; hypothetical protein P692DRAFT_201871663 [Suillus brevipes Sb2]}	{NA}	{cput:CONPUDRAFT_49943; }	{NA}	{NA}	{NA}	{NA}	{NA}	{NA}	{NA}	{NA}	{NA}
A00367	{Contig10:4633370:4636956:-}	{KAG1794770.1; hypothetical protein HD556DRAFT_1366902 [Suillus plorans]}	{NA}	{NA}	{NA}	{NA}	{GO:0005515; protein binding; molecular_function GO:0008270; zinc ion binding; molecular_function}	{NA}	{NA}	{NA}	{NA}	{NA}	{PF14634:zinc-RING finger domain}
A00368	{Contig10:4638709:4639169:-}	{NA}	{NA}	{NA}	{NA}	{NA}	{NA}	{NA}	{NA}	{NA}	{NA}	{NA}	{NA}
A00369	{Contig10:557728:560313:+}	{TFY76788.1; hypothetical protein EWM64_g7225 [Hericium alpestre]}	{NA}	{adl:AURDEDRAFT_67135; }	{NA}	{NA}	{GO:0015074; DNA integration; biological_process}	{NA}	{NA}	{NA}	{NA}	{NA}	{PF00665:Integrase core domain}
A00370	{Contig10:4639702:4640037:-}	{KAG2127458.1; hypothetical protein EDB93DRAFT_1257023 [Suillus bovinus]}	{NA}	{NA}	{NA}	{NA}	{NA}	{NA}	{NA}	{NA}	{NA}	{NA}	{NA}
A00371	{Contig10:4641955:4644270:-}	{KAG2127467.1; hypothetical protein EDB93DRAFT_1257031 [Suillus bovinus]}	{NA}	{NA}	{NA}	{NA}	{NA}	{NA}	{NA}	{NA}	{NA}	{NA}	{NA}
A00372	{Contig10:4644828:4645391:+}	{KAG2354054.1; hypothetical protein BDR07DRAFT_1495160 [Suillus spraguei]}	{NA}	{NA}	{NA}	{NA}	{NA}	{NA}	{NA}	{NA}	{NA}	{NA}	{NA}
A00373	{Contig10:4645862:4646400:+}	{KAG2029484.1; hypothetical protein BDR03DRAFT_1018321 [Suillus americanus]}	{NA}	{NA}	{NA}	{NA}	{NA}	{NA}	{NA}	{NA}	{NA}	{NA}	{NA}
A00374	{Contig10:4646637:4647762:+}	{KIK32051.1; hypothetical protein CY34DRAFT_102314, partial [Suillus luteus UH-Slu-Lm8-n1]}	{NA}	{cput:CONPUDRAFT_160538; }	{NA}	{NA}	{NA}	{NA}	{NA}	{NA}	{NA}	{NA}	{NA}
A00375	{Contig10:4649112:4649580:-}	{NA}	{NA}	{NA}	{NA}	{NA}	{NA}	{NA}	{NA}	{NA}	{NA}	{NA}	{NA}
A00376	{Contig10:4651887:4653987:+}	{KAG2126626.1; hypothetical protein EDB93DRAFT_1097000 [Suillus bovinus]}	{NA}	{NA}	{NA}	{NA}	{NA}	{NA}	{NA}	{NA}	{NA}	{NA}	{NA}
A00377	{Contig10:4655129:4656616:+}	{KAG2336725.1; hypothetical protein BDR05DRAFT_1005609 [Suillus weaverae]}	{NA}	{NA}	{NA}	{NA}	{GO:0008270; zinc ion binding; molecular_function}	{NA}	{NA}	{NA}	{NA}	{NA}	{PF01485:IBR domain, a half RING-finger domain}
A00378	{Contig10:4662238:4662702:+}	{KAG2737411.1; hypothetical protein P692DRAFT_20883595 [Suillus brevipes Sb2]}	{NA}	{NA}	{NA}	{NA}	{NA}	{NA}	{NA}	{NA}	{NA}	{NA}	{NA}
A00379	{Contig10:4665704:4666111:-}	{NA}	{NA}	{NA}	{NA}	{NA}	{GO:0005524; ATP binding; molecular_function}	{NA}	{NA}	{NA}	{NA}	{NA}	{PF01443:Viral (Superfamily 1) RNA helicase}
A00380	{Contig10:570040:571224:+}	{KAG1772845.1; hypothetical protein EV702DRAFT_1132574 [Suillus placidus]}	{NA}	{NA}	{NA}	{NA}	{NA}	{NA}	{NA}	{NA}	{NA}	{NA}	{NA}
A00381	{Contig10:4667985:4669668:-}	{KAG1847023.1; hypothetical protein DFJ58DRAFT_730351 [Suillus subalutaceus]}	{NA}	{NA}	{NA}	{NA}	{NA}	{NA}	{NA}	{NA}	{NA}	{NA}	{NA}
A00382	{Contig10:4672376:4673166:-}	{KAG1899717.1; hypothetical protein F5891DRAFT_1232789, partial [Suillus fuscotomentosus]}	{NA}	{NA}	{NA}	{NA}	{NA}	{NA}	{NA}	{NA}	{NA}	{NA}	{NA}
A00383	{Contig10:4675551:4677667:+}	{KAG1834969.1; hypothetical protein DFJ58DRAFT_847499 [Suillus subalutaceus]}	{NA}	{NA}	{NA}	{NA}	{NA}	{NA}	{NA}	{NA}	{NA}	{NA}	{NA}
A00384	{Contig10:4682103:4693688:-}	{KAG1886454.1; hypothetical protein F4604DRAFT_1675369 [Suillus subluteus]}	{NA}	{NA}	{NA}	{NA}	{GO:0008026; ATP-dependent helicase activity; molecular_function GO:0005524; ATP binding; molecular_function GO:0004386; helicase activity; molecular_function GO:0003676; nucleic acid binding; molecular_function}	{NA}	{NA}	{NA}	{NA}	{NA}	{PF00271:Helicase conserved C-terminal domain PF00270:DEAD/DEAH box helicase}
A00385	{Contig10:4694745:4696708:-}	{KAG2045668.1; hypothetical protein BDR06DRAFT_978046, partial [Suillus hirtellus]}	{NA}	{NA}	{NA}	{NA}	{NA}	{NA}	{NA}	{NA}	{NA}	{NA}	{NA}
A00386	{Contig10:4697109:4701129:+}	{OJA18739.1; hypothetical protein AZE42_12536 [Rhizopogon vesiculosus]}	{NA}	{NA}	{NA}	{NA}	{GO:0003964; RNA-directed DNA polymerase activity; molecular_function GO:0006278; RNA-dependent DNA replication; biological_process GO:0003676; nucleic acid binding; molecular_function GO:0004523; ribonuclease H activity; molecular_function GO:0003723; RNA binding; molecular_function}	{NA}	{NA}	{NA}	{YES}	{NA}	{PF00078:Reverse transcriptase (RNA-dependent DNA polymerase) PF00075:RNase H}
A00387	{Contig10:571512:575450:-}	{KAG2132057.1; hypothetical protein DEU56DRAFT_981753 [Suillus clintonianus]}	{NA}	{cput:CONPUDRAFT_122190; }	{NA}	{NA}	{NA}	{NA}	{NA}	{NA}	{NA}	{NA}	{NA}
A00388	{Contig10:577210:577638:+}	{KAG2053781.1; hypothetical protein BDR06DRAFT_956108 [Suillus hirtellus]}	{NA}	{NA}	{NA}	{NA}	{GO:0019867; outer membrane; cellular_component}	{NA}	{NA}	{NA}	{NA}	{NA}	{PF04728:Lipoprotein leucine-zipper}
A00389	{Contig10:577952:582461:-}	{KAG2134911.1; amino acid transporter [Suillus bovinus]}	{NA}	{cput:CONPUDRAFT_102751; }	{NA}	{NA}	{GO:0015171; amino acid transmembrane transporter activity; molecular_function GO:0016020; membrane; cellular_component GO:0003333; amino acid transmembrane transport; biological_process}	{NA}	{NA}	{NA}	{NA}	{SMY27695.1_; GH43_21 }	{PF13520:Amino acid permease}
A00390	{Contig10:582998:584771:-}	{KAG2086375.1; WD40-repeat-containing domain protein [Suillus discolor]}	{NA}	{NA}	{NA}	{NA}	{GO:0005515; protein binding; molecular_function}	{NA}	{NA}	{NA}	{NA}	{NA}	{PF00400:WD domain, G-beta repeat}
A00391	{Contig10:588974:591301:+}	{KAG2134915.1; Alpha/Beta hydrolase protein [Suillus bovinus]}	{D4AQA7; Probable serine carboxypeptidase ARB_06414 }	{sla:SERLADRAFT_446295; K01288 KEX1 carboxypeptidase D 3.4.16.6 }	{NA}	{NA}	{GO:0004185; serine-type carboxypeptidase activity; molecular_function GO:0006508; proteolysis; biological_process}	{NA}	{NA}	{NA}	{YES}	{QRV94664.1_; GH0 Glycoside hydrolases not yet assigned to a family. -}	{PF00450:Serine carboxypeptidase}
A00392	{Contig10:72307:74093:-}	{KAG2337132.1; hypothetical protein BDR05DRAFT_952834 [Suillus weaverae]}	{NA}	{NA}	{NA}	{NA}	{NA}	{NA}	{NA}	{NA}	{NA}	{NA}	{NA}
A00393	{Contig10:593934:596059:+}	{KAG2134916.1; major facilitator superfamily domain-containing protein [Suillus bovinus]}	{D7PHY8; Efflux pump vrtL }	{sla:SERLADRAFT_460877; }	{NA}	{gnl|TC-DB|B6HN82; 2.A.1.2.86 Pc21g09220 protein OS=Penicillium chrysogenum (strain ATCC 28089 / DSM 1075 / Wisconsin 54-1255) GN=Pc21g09220 PE=4 SV=1}	{GO:0022857; transmembrane transporter activity; molecular_function GO:0016021; integral to membrane; cellular_component GO:0055085; transmembrane transport; biological_process}	{NA}	{NA}	{NA}	{NA}	{QKX57008.1_; GH27 alpha-galactosidase (EC 3.2.1.22); alpha-N-acetylgalactosaminidase (EC 3.2.1.49); isomalto-dextranase (EC 3.2.1.94); beta-L-arabinopyranosidase (EC 3.2.1.88); galactan:galactan galactosyltransferase (EC 2.4.1.-) -}	{PF07690:Major Facilitator Superfamily PF00083:Sugar (and other) transporter}
A00394	{Contig10:596910:603414:+}	{KAG1797988.1; hypothetical protein EV424DRAFT_1648296 [Suillus variegatus]}	{NA}	{sla:SERLADRAFT_374677; }	{NA}	{NA}	{NA}	{NA}	{NA}	{NA}	{NA}	{NA}	{NA}
A00395	{Contig10:607427:608014:-}	{KAG0692514.1; hypothetical protein DFH29DRAFT_817491, partial [Suillus ampliporus]}	{NA}	{lbc:LACBIDRAFT_311344; }	{NA}	{NA}	{NA}	{NA}	{NA}	{NA}	{NA}	{NA}	{NA}
A00396	{Contig10:611022:611822:+}	{KAG1818254.1; hypothetical protein EV424DRAFT_1540196 [Suillus variegatus]}	{NA}	{NA}	{NA}	{NA}	{NA}	{NA}	{NA}	{NA}	{NA}	{NA}	{NA}
A00397	{Contig10:614804:616030:-}	{NA}	{NA}	{NA}	{NA}	{NA}	{GO:0005515; protein binding; molecular_function}	{NA}	{NA}	{NA}	{NA}	{NA}	{PF00400:WD domain, G-beta repeat}
A00398	{Contig10:617344:618780:-}	{KAG2130222.1; hypothetical protein DEU56DRAFT_955901 [Suillus clintonianus]}	{NA}	{NA}	{NA}	{NA}	{NA}	{NA}	{NA}	{NA}	{NA}	{NA}	{NA}
A00399	{Contig10:619741:620755:-}	{NA}	{NA}	{NA}	{NA}	{NA}	{NA}	{NA}	{NA}	{NA}	{NA}	{NA}	{NA}
A00400	{Contig10:620797:622224:-}	{XP_027608844.1; hypothetical protein SCP_0108130 [Sparassis crispa]}	{NA}	{mrr:Moror_11358; }	{NA}	{NA}	{GO:0015074; DNA integration; biological_process}	{NA}	{NA}	{NA}	{NA}	{NA}	{PF00665:Integrase core domain}
A00401	{Contig10:622252:624711:-}	{XP_027611901.1; Transposon Tf2-6 polyprotein [Sparassis crispa]}	{NA}	{mpr:MPER_13203; }	{At2g07660; KOG0017 FOG: Transposon-encoded proteins with TYA, reverse transcriptase, integrase domains in various combinations R General function prediction only ;}	{NA}	{GO:0003723; RNA binding; molecular_function GO:0003964; RNA-directed DNA polymerase activity; molecular_function GO:0006508; proteolysis; biological_process GO:0004190; aspartic-type endopeptidase activity; molecular_function GO:0006278; RNA-dependent DNA replication; biological_process}	{NA}	{NA}	{NA}	{NA}	{NA}	{PF00078:Reverse transcriptase (RNA-dependent DNA polymerase) PF09668:Aspartyl protease}
A00402	{Contig10:624729:625646:-}	{KAG1875253.1; hypothetical protein C8R48DRAFT_560611, partial [Suillus tomentosus]}	{NA}	{gtr:GLOTRDRAFT_33846; }	{NA}	{NA}	{GO:0003676; nucleic acid binding; molecular_function GO:0008270; zinc ion binding; molecular_function}	{NA}	{NA}	{NA}	{NA}	{NA}	{PF00098:Zinc knuckle}
A00403	{Contig10:75058:76841:-}	{KAG2127578.1; hypothetical protein EDB93DRAFT_1256975 [Suillus bovinus]}	{NA}	{NA}	{NA}	{NA}	{NA}	{NA}	{NA}	{NA}	{NA}	{NA}	{NA}
A00404	{Contig10:626804:629521:+}	{XP_027616207.1; hypothetical protein SCP_0704810 [Sparassis crispa]}	{NA}	{NA}	{NA}	{NA}	{NA}	{NA}	{NA}	{NA}	{NA}	{NA}	{NA}
A00405	{Contig10:631164:631919:+}	{KAG2135441.1; hypothetical protein DEU56DRAFT_712113, partial [Suillus clintonianus]}	{NA}	{mrr:Moror_12118; }	{NA}	{NA}	{NA}	{NA}	{NA}	{NA}	{NA}	{NA}	{NA}
A00406	{Contig10:634022:634566:+}	{KAG2135352.1; hypothetical protein EDB93DRAFT_1170811 [Suillus bovinus]}	{NA}	{NA}	{NA}	{NA}	{NA}	{NA}	{NA}	{NA}	{NA}	{NA}	{NA}
A00407	{Contig10:640063:644019:-}	{KAG1900474.1; hypothetical protein F5891DRAFT_1278351 [Suillus fuscotomentosus]}	{NA}	{NA}	{NA}	{NA}	{GO:0019079; viral genome replication; biological_process GO:0005524; ATP binding; molecular_function GO:0043531; ADP binding; molecular_function GO:0005515; protein binding; molecular_function GO:0003724; RNA helicase activity; molecular_function GO:0003723; RNA binding; molecular_function}	{NA}	{NA}	{NA}	{NA}	{NA}	{PF00004:ATPase family associated with various cellular activities (AAA) PF00400:WD domain, G-beta repeat PF00931:NB-ARC domain PF01057:Parvovirus non-structural protein NS1 PF00910:RNA helicase}
A00408	{Contig10:644627:644902:-}	{KAG0693416.1; hypothetical protein DFH29DRAFT_964187 [Suillus ampliporus]}	{NA}	{NA}	{NA}	{NA}	{GO:0016021; integral to membrane; cellular_component GO:0019087; transformation of host cell by virus; biological_process}	{NA}	{NA}	{NA}	{NA}	{NA}	{PF05297:Herpesvirus latent membrane protein 1 (LMP1)}
A00409	{Contig10:646461:647088:-}	{KAG2361229.1; hypothetical protein BDR07DRAFT_1610263 [Suillus spraguei]}	{NA}	{NA}	{NA}	{NA}	{NA}	{NA}	{NA}	{NA}	{NA}	{NA}	{NA}
A00410	{Contig10:647510:649652:-}	{KAG2134919.1; hypothetical protein EDB93DRAFT_1254422 [Suillus bovinus]}	{NA}	{sla:SERLADRAFT_359977; }	{NA}	{NA}	{NA}	{NA}	{NA}	{NA}	{NA}	{NA}	{NA}
A00411	{Contig10:650369:653430:+}	{KAG2065917.1; hypothetical protein BDR04DRAFT_1107710 [Suillus decipiens]}	{NA}	{mrr:Moror_2787; }	{NA}	{NA}	{NA}	{NA}	{NA}	{NA}	{NA}	{NA}	{NA}
A00412	{Contig10:653686:655381:-}	{KAG2134921.1; Alpha/Beta hydrolase protein [Suillus bovinus]}	{NA}	{sla:SERLADRAFT_354546; K08726 EPHX2 soluble epoxide hydrolase / lipid-phosphate phosphatase 3.3.2.10 3.1.3.76 Metabolism; Lipid metabolism; Arachidonic acid metabolism [PATH:ko00590] Metabolism; Xenobiotics biodegradation and metabolism; Chloroalkane and chloroalkene degradation [PATH:ko00625] Metabolism; Global and overview maps; Metabolic pathways [PATH:ko01100] Metabolism; Global and overview…	{NA}	{NA}	{NA}	{NA}	{NA}	{NA}	{NA}	{NA}	{NA}
A00413	{Contig10:663471:663923:-}	{KAG2134922.1; hypothetical protein EDB93DRAFT_1092584 [Suillus bovinus]}	{NA}	{NA}	{NA}	{NA}	{NA}	{NA}	{NA}	{NA}	{NA}	{NA}	{NA}
A00414	{Contig10:77112:80130:+}	{KAG2127579.1; hypothetical protein EDB93DRAFT_1256976 [Suillus bovinus]}	{NA}	{NA}	{NA}	{NA}	{NA}	{NA}	{NA}	{NA}	{NA}	{NA}	{NA}
A00415	{Contig10:665337:667870:+}	{KAG2134923.1; hypothetical protein EDB93DRAFT_1172026 [Suillus bovinus]}	{NA}	{dsq:DICSQDRAFT_173004; }	{NA}	{NA}	{NA}	{NA}	{NA}	{NA}	{NA}	{NA}	{NA}
A00416	{Contig10:668474:671937:-}	{KAG1817717.1; Alpha/Beta hydrolase protein [Suillus subaureus]}	{NA}	{sla:SERLADRAFT_446295; K01288 KEX1 carboxypeptidase D 3.4.16.6 }	{NA}	{NA}	{GO:0004185; serine-type carboxypeptidase activity; molecular_function GO:0006281; DNA repair; biological_process GO:0003824; NA GO:0006508; proteolysis; biological_process}	{NA}	{NA}	{NA}	{NA}	{QRV94664.1_; GH0 Glycoside hydrolases not yet assigned to a family. -}	{PF00450:Serine carboxypeptidase PF01035:6-O-methylguanine DNA methyltransferase, DNA binding domain}
A00417	{Contig10:675566:677021:-}	{KAG2084487.1; hypothetical protein F5147DRAFT_748801 [Suillus discolor]}	{NA}	{cput:CONPUDRAFT_55437; }	{NA}	{NA}	{GO:0006508; proteolysis; biological_process GO:0005737; cytoplasm; cellular_component GO:0030145; manganese ion binding; molecular_function GO:0008235; metalloexopeptidase activity; molecular_function GO:0004177; aminopeptidase activity; molecular_function}	{NA}	{NA}	{NA}	{NA}	{NA}	{PF12404:Peptidase }
A00418	{Contig10:677746:679971:+}	{KAG2134929.1; hypothetical protein EDB93DRAFT_1107253 [Suillus bovinus]}	{NA}	{NA}	{NA}	{NA}	{GO:0019079; viral genome replication; biological_process GO:0008270; zinc ion binding; molecular_function GO:0003723; RNA binding; molecular_function}	{NA}	{NA}	{NA}	{NA}	{NA}	{PF09401:Coronavirus RNA synthesis protein NSP10}
A00419	{Contig10:680597:681273:+}	{KAG2158733.1; hypothetical protein EDB93DRAFT_1100364 [Suillus bovinus]}	{NA}	{NA}	{NA}	{NA}	{GO:0005577; fibrinogen complex; cellular_component GO:0030168; platelet activation; biological_process GO:0005102; receptor binding; molecular_function GO:0005737; cytoplasm; cellular_component GO:0007165; signal transduction; biological_process GO:0051258; protein polymerization; biological_process GO:0016020; membrane; cellular_component GO:0030674; protein binding, bridging; molecular_functio…	{NA}	{NA}	{NA}	{NA}	{NA}	{PF04871:Uso1 / p115 like vesicle tethering protein, C terminal region PF08702:Fibrinogen alpha/beta chain family}
A00420	{Contig10:682557:683350:-}	{KAG1730916.1; hypothetical protein EDB19DRAFT_1912755 [Suillus lakei]}	{NA}	{NA}	{NA}	{NA}	{NA}	{NA}	{NA}	{NA}	{NA}	{NA}	{NA}
A00421	{Contig10:683835:684722:-}	{KAG0691602.1; hypothetical protein DFH29DRAFT_1010670 [Suillus ampliporus]}	{NA}	{NA}	{NA}	{NA}	{GO:0005198; NA GO:0051301; cell division; biological_process GO:0006606; protein import into nucleus; biological_process GO:0007155; cell adhesion; biological_process GO:0005604; basement membrane; cellular_component GO:0007059; chromosome segregation; biological_process GO:0005643; nuclear pore; cellular_component GO:0000444; MIS12/MIND type complex; cellular_component}	{NA}	{NA}	{NA}	{NA}	{NA}	{PF07926:TPR/MLP1/MLP2-like protein PF08202:Mis12-Mtw1 protein family PF06009:Laminin Domain II PF06810:Phage minor structural protein GP20}
A00422	{Contig10:685170:685746:-}	{KAG1720017.1; hypothetical protein EDB19DRAFT_1966659 [Suillus lakei]}	{NA}	{NA}	{NA}	{NA}	{NA}	{NA}	{NA}	{NA}	{NA}	{NA}	{NA}
A00423	{Contig10:686293:687477:+}	{KAG1723449.1; hypothetical protein EDB19DRAFT_1834602 [Suillus lakei]}	{NA}	{NA}	{NA}	{NA}	{NA}	{NA}	{NA}	{NA}	{NA}	{NA}	{NA}
A00424	{Contig10:688774:690334:-}	{KAG1733408.1; hypothetical protein EDB91DRAFT_1084461 [Suillus paluster]}	{NA}	{NA}	{NA}	{NA}	{NA}	{NA}	{NA}	{NA}	{NA}	{NA}	{NA}
A00425	{Contig10:81525:88075:-}	{KAG2128356.1; hypothetical protein EDB93DRAFT_1256700 [Suillus bovinus]}	{NA}	{NA}	{NA}	{NA}	{NA}	{NA}	{NA}	{NA}	{NA}	{NA}	{NA}
A00426	{Contig10:697260:699394:+}	{KAG1724385.1; hypothetical protein EDB91DRAFT_1255248 [Suillus paluster]}	{NA}	{NA}	{NA}	{NA}	{GO:0000981; sequence-specific DNA binding RNA polymerase II transcription factor activity; molecular_function GO:0008270; zinc ion binding; molecular_function GO:0005634; nucleus; cellular_component GO:0006355; regulation of transcription, DNA-dependent; biological_process}	{NA}	{NA}	{NA}	{NA}	{NA}	{PF00172:Fungal Zn(2)-Cys(6) binuclear cluster domain}
A00427	{Contig10:704240:704950:-}	{KAG2740399.1; hypothetical protein P692DRAFT_20881266, partial [Suillus brevipes Sb2]}	{NA}	{NA}	{NA}	{NA}	{NA}	{NA}	{NA}	{NA}	{NA}	{NA}	{NA}
A00428	{Contig10:705035:705830:-}	{KAG1816302.1; hypothetical protein DFJ58DRAFT_850454 [Suillus subalutaceus]}	{NA}	{NA}	{NA}	{NA}	{NA}	{NA}	{NA}	{NA}	{NA}	{NA}	{NA}
A00429	{Contig10:708948:711002:-}	{KAG2128375.1; hypothetical protein EDB93DRAFT_1256673 [Suillus bovinus]}	{NA}	{NA}	{NA}	{NA}	{NA}	{NA}	{NA}	{NA}	{NA}	{NA}	{NA}
A00430	{Contig10:711249:712595:+}	{KAG2129243.1; hypothetical protein EDB93DRAFT_1256304 [Suillus bovinus]}	{NA}	{NA}	{NA}	{NA}	{NA}	{NA}	{NA}	{NA}	{NA}	{NA}	{NA}
A00431	{Contig10:713428:714469:-}	{KAG2147766.1; hypothetical protein EDB93DRAFT_1250476 [Suillus bovinus]}	{NA}	{NA}	{NA}	{NA}	{NA}	{NA}	{NA}	{NA}	{NA}	{NA}	{NA}
A00432	{Contig10:716951:730772:+}	{KAG1852270.1; hypothetical protein DFJ58DRAFT_716610 [Suillus subalutaceus]}	{NA}	{NA}	{NA}	{NA}	{NA}	{NA}	{NA}	{NA}	{NA}	{NA}	{NA}
A00433	{Contig10:732544:734062:-}	{KAG2745439.1; hypothetical protein P692DRAFT_20741970 [Suillus brevipes Sb2]}	{NA}	{gtr:GLOTRDRAFT_79649; }	{NA}	{NA}	{NA}	{NA}	{NA}	{NA}	{NA}	{NA}	{NA}
A00434	{Contig10:735203:735682:+}	{NA}	{NA}	{NA}	{NA}	{NA}	{NA}	{NA}	{NA}	{NA}	{NA}	{NA}	{NA}
A00435	{Contig10:738976:741262:-}	{KAG2126324.1; Alpha/Beta hydrolase protein [Suillus bovinus]}	{D4AQA7; Probable serine carboxypeptidase ARB_06414 }	{sla:SERLADRAFT_446295; K01288 KEX1 carboxypeptidase D 3.4.16.6 }	{NA}	{NA}	{GO:0006508; proteolysis; biological_process GO:0004185; serine-type carboxypeptidase activity; molecular_function}	{NA}	{NA}	{NA}	{NA}	{QRV94664.1_; GH0 Glycoside hydrolases not yet assigned to a family. -}	{PF00450:Serine carboxypeptidase}
A00436	{Contig10:89010:89840:+}	{KAG2128355.1; hypothetical protein EDB93DRAFT_1096042 [Suillus bovinus]}	{NA}	{mpr:MPER_04494; }	{NA}	{NA}	{GO:0003677; DNA binding; molecular_function GO:0008270; zinc ion binding; molecular_function GO:0005634; nucleus; cellular_component GO:0006351; transcription, DNA-dependent; biological_process}	{NA}	{NA}	{NA}	{NA}	{NA}	{PF04082:Fungal specific transcription factor domain }
A00437	{Contig10:747895:748458:+}	{KIK32230.1; hypothetical protein CY34DRAFT_19191 [Suillus luteus UH-Slu-Lm8-n1]}	{NA}	{NA}	{NA}	{NA}	{NA}	{NA}	{NA}	{NA}	{NA}	{NA}	{NA}
A00438	{Contig10:750890:756431:+}	{KAG0707026.1; hypothetical protein DFH29DRAFT_995346 [Suillus ampliporus]}	{NA}	{NA}	{NA}	{NA}	{NA}	{NA}	{NA}	{NA}	{NA}	{NA}	{NA}
A00439	{Contig10:756490:756945:-}	{NA}	{NA}	{NA}	{NA}	{NA}	{NA}	{NA}	{NA}	{NA}	{NA}	{NA}	{NA}
A00440	{Contig10:758205:761240:+}	{XP_001835316.2; transcriptional factor B3 [Coprinopsis cinerea okayama7#130]}	{NA}	{cci:CC1G_10243; }	{NA}	{NA}	{GO:0005524; ATP binding; molecular_function GO:0003678; DNA helicase activity; molecular_function GO:0003677; DNA binding; molecular_function GO:0004386; helicase activity; molecular_function GO:0016301; kinase activity; molecular_function GO:0000723; telomere maintenance; biological_process GO:0006281; DNA repair; biological_process GO:0051085; chaperone mediated protein folding requiring cofac…	{NA}	{NA}	{NA}	{NA}	{NA}	{PF02689:Helicase PF05970:PIF1-like helicase PF04851:Type III restriction enzyme, res subunit PF06414:Zeta toxin PF06309:Torsin}
A00441	{Contig10:762915:765231:-}	{KAG2153513.1; Alpha/Beta hydrolase protein [Suillus bovinus]}	{D4AQA7; Probable serine carboxypeptidase ARB_06414 }	{sla:SERLADRAFT_446295; K01288 KEX1 carboxypeptidase D 3.4.16.6 }	{NA}	{NA}	{GO:0004185; serine-type carboxypeptidase activity; molecular_function GO:0006508; proteolysis; biological_process}	{NA}	{Q4PDC5_USTMA; UM01888.1 EAK82769.1 583 Ustilago maydis 237631 CAUTION: The sequence shown here is derived from an EMBL/GenBank/DDBJ whole genome shotgun (WGS) entry which is preliminary data. 17080091 XP_758035.1, XM_752942.1 {ID:PF00450; Description: Peptidase_S10} Euchlaena spp., Zea spp. (Poaceae) herb Smut. Corn smut Smut {ID:0004185; Method: IEA:InterPro; Description: F:serine-type carboxyp…	{NA}	{YES}	{QRV94664.1_; GH0 Glycoside hydrolases not yet assigned to a family. -}	{PF00450:Serine carboxypeptidase}
A00442	{Contig10:766041:766614:-}	{NA}	{NA}	{NA}	{NA}	{NA}	{NA}	{NA}	{NA}	{NA}	{NA}	{NA}	{NA}
A00443	{Contig10:769799:772926:-}	{KAG2153510.1; hypothetical protein EDB93DRAFT_1135279 [Suillus bovinus]}	{NA}	{sla:SERLADRAFT_446303; K14408 CSTF3, RNA14 cleavage stimulation factor subunit 3 -- Genetic Information Processing; Translation; mRNA surveillance pathway [PATH:ko03015]}	{NA}	{NA}	{GO:0003824; NA GO:0005634; nucleus; cellular_component GO:0006397; mRNA processing; biological_process GO:0005515; protein binding; molecular_function GO:0044237; cellular metabolic process; biological_process}	{NA}	{NA}	{NA}	{NA}	{NA}	{PF13174:Tetratricopeptide repeat PF05843:Suppressor of forked protein (Suf) PF04961:Formiminotransferase-cyclodeaminase}
A00444	{Contig10:773056:775710:+}	{KAG2153509.1; glycoside hydrolase family 85 protein [Suillus bovinus]}	{NA}	{sla:SERLADRAFT_359988; K01227 E3.2.1.96 mannosyl-glycoprotein endo-beta-N-acetylglucosaminidase 3.2.1.96 Metabolism; Glycan biosynthesis and metabolism; Other glycan degradation [PATH:ko00511]}	{NA}	{NA}	{GO:0033925; mannosyl-glycoprotein endo-beta-N-acetylglucosaminidase activity; molecular_function GO:0005737; cytoplasm; cellular_component}	{NA}	{NA}	{NA}	{NA}	{VWP00370.1_; GH85 endo-beta-N-acetylglucosaminidase (EC 3.2.1.96) -}	{PF03644:Glycosyl hydrolase family 85 }
A00445	{Contig10:776295:779516:-}	{KAG2153508.1; purine nucleotide binding protein [Suillus bovinus]}	{O60182; Replication factor C subunit 1 }	{sla:SERLADRAFT_434847; K10754 RFC1 replication factor C subunit 1 -- Genetic Information Processing; Replication and repair; DNA replication [PATH:ko03030] Genetic Information Processing; Replication and repair; Nucleotide excision repair [PATH:ko03420] Genetic Information Processing; Replication and repair; Mismatch repair [PATH:ko03430]}	{SPBC23E6.07c; KOG1968 Replication factor C, subunit RFC1 (large subunit) L Replication, recombination and repair ;}	{NA}	{GO:0098519; NA GO:0009360; DNA polymerase III complex; cellular_component GO:0003887; DNA-directed DNA polymerase activity; molecular_function GO:0005524; ATP binding; molecular_function GO:0003677; DNA binding; molecular_function GO:0005663; DNA replication factor C complex; cellular_component GO:0009378; four-way junction helicase activity; molecular_function GO:0006355; regulation of transcri…	{NA}	{NA}	{NA}	{NA}	{NA}	{PF07728:AAA domain (dynein-related subfamily) PF00158:Sigma-54 interaction domain PF08519:Replication factor RFC1 C terminal domain PF06144:DNA polymerase III, delta subunit PF00004:ATPase family associated with various cellular activities (AAA) PF03266:NTPase PF05496:Holliday junction DNA helicase RuvB P-loop domain}
A00446	{Contig10:780125:784946:-}	{KAG2153507.1; AAA-domain-containing protein [Suillus bovinus]}	{O14114; Uncharacterized AAA domain-containing protein C31G5.19 }	{tvs:TRAVEDRAFT_164070; K22531 ATAD2 ATPase family AAA domain-containing protein 2 3.6.1.- }	{SPAC31G5.19; KOG0732 AAA+-type ATPase containing the bromodomain O Posttranslational modification, protein turnover, chaperones ;}	{NA}	{GO:0005524; ATP binding; molecular_function GO:0003678; DNA helicase activity; molecular_function GO:0015995; chlorophyll biosynthetic process; biological_process GO:0009378; four-way junction helicase activity; molecular_function GO:0016851; magnesium chelatase activity; molecular_function GO:0006281; DNA repair; biological_process GO:0016887; ATPase activity; molecular_function GO:0006310; DNA…	{PHI:1566; I1RC95 GzOB006 5518 Fusarium graminearum Fusarium Ear Blight Triticum (related: wheat) transcription factor gene deletion lethal}	{NA}	{NA}	{NA}	{NA}	{PF02562:PhoH-like protein PF06068:TIP49 P-loop domain PF07724:AAA domain (Cdc48 subfamily) PF01695:IstB-like ATP binding protein PF01078:Magnesium chelatase, subunit ChlI PF05496:Holliday junction DNA helicase RuvB P-loop domain PF00004:ATPase family associated with various cellular activities (AAA) PF00910:RNA helicase PF07728:AAA domain (dynein-related subfamily)}
A00447	{Contig10:92295:93501:+}	{KAG2128351.1; hypothetical protein EDB93DRAFT_1268446 [Suillus bovinus]}	{NA}	{NA}	{NA}	{NA}	{GO:0007165; signal transduction; biological_process GO:0006468; protein phosphorylation; biological_process GO:0006886; intracellular protein transport; biological_process GO:0004674; protein serine/threonine kinase activity; molecular_function GO:0008536; Ran GTPase binding; molecular_function GO:0005096; GTPase activator activity; molecular_function}	{NA}	{NA}	{NA}	{NA}	{NA}	{PF03810:Importin-beta N-terminal domain PF09036:Bcr-Abl oncoprotein oligomerisation domain}
A00448	{Contig10:785729:788000:+}	{KAG2153506.1; hypothetical protein EDB93DRAFT_220268 [Suillus bovinus]}	{NA}	{sla:SERLADRAFT_434841; }	{NA}	{NA}	{NA}	{NA}	{NA}	{NA}	{NA}	{NA}	{NA}
A00449	{Contig10:788435:788836:-}	{KAG1809485.1; hypothetical protein EV424DRAFT_1349987 [Suillus variegatus]}	{NA}	{NA}	{NA}	{NA}	{NA}	{NA}	{NA}	{NA}	{NA}	{NA}	{NA}
A00450	{Contig10:790520:793136:+}	{KAG1800326.1; general substrate transporter [Suillus plorans]}	{NA}	{sla:SERLADRAFT_373197; }	{NA}	{NA}	{GO:0055085; transmembrane transport; biological_process GO:0016021; integral to membrane; cellular_component GO:0022857; transmembrane transporter activity; molecular_function}	{NA}	{NA}	{NA}	{NA}	{NA}	{PF07690:Major Facilitator Superfamily PF00083:Sugar (and other) transporter}
A00451	{Contig10:794367:795911:-}	{KAG2152856.1; hypothetical protein DEU56DRAFT_908040 [Suillus clintonianus]}	{NA}	{NA}	{NA}	{NA}	{NA}	{NA}	{NA}	{NA}	{NA}	{NA}	{NA}
A00452	{Contig10:804318:816721:+}	{KAG0707160.1; hypothetical protein DFH29DRAFT_995221 [Suillus ampliporus]}	{NA}	{NA}	{NA}	{NA}	{NA}	{NA}	{NA}	{NA}	{NA}	{NA}	{NA}
A00453	{Contig10:818262:821093:+}	{NA}	{NA}	{NA}	{NA}	{NA}	{GO:0015074; DNA integration; biological_process}	{NA}	{NA}	{NA}	{NA}	{NA}	{PF00665:Integrase core domain}
A00454	{Contig10:828375:828916:-}	{KAG1837182.1; hypothetical protein DFJ58DRAFT_634848, partial [Suillus subalutaceus]}	{NA}	{NA}	{NA}	{NA}	{NA}	{NA}	{NA}	{NA}	{NA}	{NA}	{NA}
A00455	{Contig10:831450:833791:-}	{KAG1737140.1; hypothetical protein EDB91DRAFT_1083172 [Suillus paluster]}	{NA}	{NA}	{NA}	{NA}	{NA}	{NA}	{NA}	{NA}	{NA}	{NA}	{NA}
A00456	{Contig10:836365:838735:-}	{KAG1766208.1; hypothetical protein EDD22DRAFT_1012024, partial [Suillus occidentalis]}	{NA}	{NA}	{NA}	{NA}	{NA}	{NA}	{NA}	{NA}	{NA}	{NA}	{NA}
A00457	{Contig10:844518:847039:+}	{KAG2153497.1; general substrate transporter [Suillus bovinus]}	{NA}	{cput:CONPUDRAFT_89403; }	{NA}	{NA}	{GO:0016021; integral to membrane; cellular_component GO:0022857; transmembrane transporter activity; molecular_function GO:0055085; transmembrane transport; biological_process}	{NA}	{NA}	{NA}	{NA}	{NA}	{PF07690:Major Facilitator Superfamily PF00083:Sugar (and other) transporter}
A00458	{Contig10:558:3068:-}	{PSR81378.1; hypothetical protein PHLCEN_2v6386 [Phlebia centrifuga]}	{NA}	{NA}	{NA}	{NA}	{GO:0008270; zinc ion binding; molecular_function GO:0003676; nucleic acid binding; molecular_function GO:0015074; DNA integration; biological_process}	{NA}	{NA}	{NA}	{NA}	{NA}	{PF00098:Zinc knuckle PF00665:Integrase core domain}
A00459	{Contig10:94154:94641:-}	{KAG2128352.1; hypothetical protein EDB93DRAFT_1268447 [Suillus bovinus]}	{NA}	{NA}	{NA}	{NA}	{GO:0005515; protein binding; molecular_function}	{NA}	{NA}	{NA}	{NA}	{NA}	{PF00515:Tetratricopeptide repeat}
A00460	{Contig10:848485:851040:+}	{KAG2153496.1; general substrate transporter [Suillus bovinus]}	{NA}	{cput:CONPUDRAFT_89403; }	{NA}	{NA}	{GO:0055085; transmembrane transport; biological_process GO:0022857; transmembrane transporter activity; molecular_function GO:0016021; integral to membrane; cellular_component}	{NA}	{NA}	{NA}	{NA}	{NA}	{PF07690:Major Facilitator Superfamily PF00083:Sugar (and other) transporter}
A00461	{Contig10:852600:855002:-}	{KAG2153495.1; calcium-activated chloride channel-domain-containing protein [Suillus bovinus]}	{NA}	{sla:SERLADRAFT_446300; K19327 ANO10, TMEM16K anoctamin-10 -- }	{NA}	{NA}	{NA}	{NA}	{NA}	{NA}	{NA}	{NA}	{NA}
A00462	{Contig10:855386:857470:-}	{KAG2339189.1; RNA-binding domain-containing protein [Suillus weaverae]}	{NA}	{mrr:Moror_7732; K14411 MSI RNA-binding protein Musashi -- Genetic Information Processing; Translation; mRNA surveillance pathway [PATH:ko03015]}	{NA}	{NA}	{GO:0003676; nucleic acid binding; molecular_function}	{NA}	{NA}	{NA}	{NA}	{NA}	{PF00076:RNA recognition motif. (a.k.a. RRM, RBD, or RNP domain)}
A00463	{Contig10:857711:858632:+}	{KAG2153492.1; PdxT/SNO family [Suillus bovinus]}	{Q8LAD0; Probable pyridoxal 5'-phosphate synthase subunit PDX2 }	{sla:SERLADRAFT_459857; K08681 pdxT, pdx2 5'-phosphate synthase pdxT subunit 4.3.3.6 Metabolism; Metabolism of cofactors and vitamins; Vitamin B6 metabolism [PATH:ko00750]}	{At5g60540; KOG3210 Imidazoleglycerol-phosphate synthase subunit H-like H Coenzyme transport and metabolism ;}	{NA}	{GO:0008236; serine-type peptidase activity; molecular_function GO:0003824; NA GO:0009236; cobalamin biosynthetic process; biological_process GO:0006508; proteolysis; biological_process}	{NA}	{NA}	{NA}	{NA}	{NA}	{PF03575:Peptidase family S51 PF07685:CobB/CobQ-like glutamine amidotransferase domain}
A00464	{Contig10:859508:860988:-}	{KAG2153491.1; hypothetical protein EDB93DRAFT_219720 [Suillus bovinus]}	{NA}	{NA}	{NA}	{NA}	{NA}	{NA}	{NA}	{NA}	{NA}	{NA}	{NA}
A00465	{Contig10:863304:867130:+}	{KAG1900474.1; hypothetical protein F5891DRAFT_1278351 [Suillus fuscotomentosus]}	{NA}	{NA}	{NA}	{NA}	{GO:0019079; viral genome replication; biological_process GO:0043531; ADP binding; molecular_function GO:0005515; protein binding; molecular_function}	{NA}	{NA}	{NA}	{NA}	{NA}	{PF01057:Parvovirus non-structural protein NS1 PF00400:WD domain, G-beta repeat PF00931:NB-ARC domain}
A00466	{Contig10:870068:874426:-}	{KAG2153472.1; hypothetical protein EDB93DRAFT_1248737 [Suillus bovinus]}	{NA}	{NA}	{NA}	{NA}	{GO:0005515; protein binding; molecular_function}	{NA}	{NA}	{NA}	{NA}	{NA}	{PF00400:WD domain, G-beta repeat PF13176:Tetratricopeptide repeat PF00515:Tetratricopeptide repeat PF13181:Tetratricopeptide repeat}
A00467	{Contig10:875644:877041:-}	{KAG2153470.1; DExH-box splicing factor binding site-domain-containing protein [Suillus bovinus]}	{NA}	{cput:CONPUDRAFT_132659; }	{NA}	{NA}	{NA}	{NA}	{NA}	{NA}	{NA}	{NA}	{NA}
A00468	{Contig10:877175:879996:-}	{KAG2153469.1; transcriptional repressor TCF25-domain-containing protein [Suillus bovinus]}	{NA}	{sla:SERLADRAFT_446308; }	{NA}	{NA}	{GO:0005515; protein binding; molecular_function GO:0009424; bacterial-type flagellum hook; cellular_component}	{NA}	{NA}	{NA}	{NA}	{NA}	{PF13176:Tetratricopeptide repeat PF00515:Tetratricopeptide repeat PF02465:Flagellar hook-associated protein 2 N-terminus}
A00469	{Contig10:880445:882522:+}	{KAG2153468.1; major facilitator superfamily domain-containing protein [Suillus bovinus]}	{NA}	{sla:SERLADRAFT_459884; }	{NA}	{NA}	{GO:0016021; integral to membrane; cellular_component GO:0055085; transmembrane transport; biological_process}	{NA}	{NA}	{NA}	{NA}	{NA}	{PF07690:Major Facilitator Superfamily}
A00470	{Contig10:95062:99132:-}	{KAG2128353.1; hypothetical protein EDB93DRAFT_1268453 [Suillus bovinus]}	{NA}	{NA}	{NA}	{NA}	{GO:0008536; Ran GTPase binding; molecular_function GO:0006886; intracellular protein transport; biological_process}	{NA}	{NA}	{NA}	{NA}	{NA}	{PF03810:Importin-beta N-terminal domain}
A00471	{Contig10:882840:884570:-}	{KAG2153467.1; hypothetical protein EDB93DRAFT_219459 [Suillus bovinus]}	{NA}	{NA}	{NA}	{NA}	{NA}	{NA}	{NA}	{NA}	{NA}	{NA}	{NA}
A00472	{Contig10:885882:887282:+}	{KAG2153466.1; hypothetical protein EDB93DRAFT_1082341 [Suillus bovinus]}	{NA}	{sla:SERLADRAFT_454483; }	{NA}	{NA}	{NA}	{NA}	{NA}	{NA}	{NA}	{NA}	{NA}
A00473	{Contig10:887935:890070:+}	{KAG2153465.1; hypothetical protein EDB93DRAFT_1102621 [Suillus bovinus]}	{Q0VCA5; Deoxynucleoside triphosphate triphosphohydrolase SAMHD1 }	{sla:SERLADRAFT_358952; K22544 SAMHD1 deoxynucleoside triphosphate triphosphohydrolase SAMHD1 3.1.5.- Human Diseases; Infectious diseases: Viral; Human immunodeficiency virus 1 infection [PATH:ko05170]}	{Hs14770705; KOG2681 Metal-dependent phosphohydrolase S Function unknown ;}	{NA}	{GO:0046872; metal ion binding; molecular_function GO:0008081; phosphoric diester hydrolase activity; molecular_function}	{NA}	{NA}	{NA}	{NA}	{QRV72963.1_; GH43_13 }	{PF01966:HD domain}
A00474	{Contig10:890915:892722:+}	{KAG2153464.1; WD40-repeat-containing domain protein [Suillus bovinus]}	{NA}	{NA}	{NA}	{NA}	{GO:0005515; protein binding; molecular_function}	{NA}	{NA}	{NA}	{NA}	{NA}	{PF00400:WD domain, G-beta repeat}
A00475	{Contig10:892968:893933:-}	{KAG2153463.1; thymidylate synthase/dCMP hydroxymethylase domain-containing protein [Suillus bovinus]}	{Q9P4T7; Thymidylate synthase }	{sla:SERLADRAFT_444278; K00560 thyA, TYMS thymidylate synthase 2.1.1.45 Metabolism; Nucleotide metabolism; Pyrimidine metabolism [PATH:ko00240] Metabolism; Metabolism of cofactors and vitamins; One carbon pool by folate [PATH:ko00670] Metabolism; Global and overview maps; Metabolic pathways [PATH:ko01100] Human Diseases; Drug resistance: Antineoplastic; Antifolate resistance [PATH:ko01523]}	{SPAC15E1.04_2; KOG0673 Thymidylate synthase F Nucleotide transport and metabolism ;}	{NA}	{GO:0004799; thymidylate synthase activity; molecular_function GO:0006231; dTMP biosynthetic process; biological_process}	{NA}	{NA}	{NA}	{NA}	{NA}	{PF00303:Thymidylate synthase}
A00476	{Contig10:894150:895111:-}	{KAG2155995.1; hypothetical protein EDB93DRAFT_65903 [Suillus bovinus]}	{NA}	{NA}	{NA}	{NA}	{NA}	{NA}	{NA}	{NA}	{NA}	{NA}	{NA}
A00477	{Contig10:897593:899317:-}	{KAG2153460.1; hypothetical protein EDB93DRAFT_1248728 [Suillus bovinus]}	{NA}	{NA}	{NA}	{NA}	{NA}	{NA}	{NA}	{NA}	{NA}	{NA}	{NA}
A00478	{Contig10:901604:906627:+}	{KAG2159005.1; CHAT domain-containing protein [Suillus bovinus]}	{NA}	{NA}	{NA}	{NA}	{GO:0005515; protein binding; molecular_function}	{NA}	{NA}	{NA}	{NA}	{NA}	{PF13181:Tetratricopeptide repeat}
A00479	{Contig10:907931:912913:-}	{KAG1900474.1; hypothetical protein F5891DRAFT_1278351 [Suillus fuscotomentosus]}	{NA}	{NA}	{NA}	{NA}	{GO:0003723; RNA binding; molecular_function GO:0003724; RNA helicase activity; molecular_function GO:0005515; protein binding; molecular_function GO:0043531; ADP binding; molecular_function GO:0019079; viral genome replication; biological_process}	{NA}	{NA}	{NA}	{NA}	{NA}	{PF00910:RNA helicase PF01057:Parvovirus non-structural protein NS1 PF00931:NB-ARC domain PF00400:WD domain, G-beta repeat}
A00480	{Contig10:912962:921690:+}	{KAG2153453.1; ribosome 60S biogenesis N-terminal-domain-containing protein [Suillus bovinus]}	{NA}	{sla:SERLADRAFT_444262; K14861 URB1 nucleolar pre-ribosomal-associated protein 1 -- }	{NA}	{NA}	{GO:0006355; regulation of transcription, DNA-dependent; biological_process GO:0005515; protein binding; molecular_function GO:0016573; histone acetylation; biological_process GO:0000123; histone acetyltransferase complex; cellular_component GO:0004402; histone acetyltransferase activity; molecular_function GO:0005634; nucleus; cellular_component GO:0003713; transcription coactivator activity; mo…	{NA}	{NA}	{NA}	{NA}	{NA}	{PF00514:Armadillo/beta-catenin-like repeat PF09030:Creb binding}
A00481	{Contig10:100588:102801:-}	{KAG2127575.1; hypothetical protein EDB93DRAFT_1256972 [Suillus bovinus]}	{NA}	{NA}	{NA}	{NA}	{NA}	{NA}	{NA}	{NA}	{NA}	{NA}	{NA}
A00482	{Contig10:923213:924967:+}	{KAG1800334.1; hypothetical protein HD556DRAFT_1028494 [Suillus plorans]}	{NA}	{NA}	{NA}	{NA}	{GO:0006950; response to stress; biological_process GO:0005515; protein binding; molecular_function GO:0005783; endoplasmic reticulum; cellular_component}	{NA}	{NA}	{NA}	{NA}	{NA}	{PF00400:WD domain, G-beta repeat PF13694:Sec63/Sec62 complex-interacting family}
A00483	{Contig10:925054:927581:+}	{KAG2153472.1; hypothetical protein EDB93DRAFT_1248737 [Suillus bovinus]}	{NA}	{NA}	{NA}	{NA}	{GO:0005515; protein binding; molecular_function}	{NA}	{NA}	{NA}	{NA}	{NA}	{PF13176:Tetratricopeptide repeat PF00515:Tetratricopeptide repeat}
A00484	{Contig10:929014:930387:-}	{KAG2153451.1; Alpha/beta hydrolase fold-1 [Suillus bovinus]}	{NA}	{sla:SERLADRAFT_341696; }	{NA}	{NA}	{NA}	{NA}	{NA}	{NA}	{NA}	{NA}	{NA}
A00485	{Contig10:930475:933397:+}	{KAG2153450.1; hypothetical protein EDB93DRAFT_1134981 [Suillus bovinus]}	{NA}	{cput:CONPUDRAFT_123376; }	{NA}	{NA}	{GO:0005524; ATP binding; molecular_function}	{NA}	{NA}	{NA}	{NA}	{NA}	{PF00004:ATPase family associated with various cellular activities (AAA)}
A00486	{Contig10:933671:936931:+}	{KAG2153449.1; glycosyltransferase family 39 protein [Suillus bovinus]}	{O74189; Dolichyl-phosphate-mannose--protein mannosyltransferase 1 }	{sla:SERLADRAFT_344737; K00728 POMT, pmt dolichyl-phosphate-mannose-protein mannosyltransferase 2.4.1.109 Metabolism; Glycan biosynthesis and metabolism; Other types of O-glycan biosynthesis [PATH:ko00514] Metabolism; Glycan biosynthesis and metabolism; Mannose type O-glycan biosynthesis [PATH:ko00515] Metabolism; Global and overview maps; Metabolic pathways [PATH:ko01100]}	{YDL095w; KOG3359 Dolichyl-phosphate-mannose:protein O-mannosyl transferase O Posttranslational modification, protein turnover, chaperones ;}	{gnl|TC-DB|P33775; 9.B.142.5.6 Dolichyl-phosphate-mannose--protein mannosyltransferase 1 OS=Saccharomyces cerevisiae (strain ATCC 204508 / S288c) OX=559292 GN=PMT1 PE=1 SV=1}	{GO:0016020; membrane; cellular_component GO:0006493; protein O-linked glycosylation; biological_process GO:0000030; mannosyltransferase activity; molecular_function}	{PHI:3030; F5HFL6 PMT1 5207 Cryptococcus neoformans No Data Found Lethal pathogen phenotype protein-O-mannosyltransferase gene deletion: full; gene complementation lethal}	{PMT1_CANAL; PMT1 AAC31119.1 877 Candida albicans 5476 FUNCTION: Transfers mannose from Dol-P-mannose to Ser or Thr residues on proteins.; CATALYTIC ACTIVITY: Dolichyl phosphate D-mannose + protein = dolichyl phosphate + O-D-mannosylprotein.; PATHWAY: Protein modification; protein glycosylation.; SUBCELLULAR LOCATION: Endoplasmic reticulum membrane; Multi-pass membrane protein.; SIMILARITY: Belon…	{NA}	{NA}	{QRW01455.1_; GT39 Dol-P-Man: protein alpha-mannosyltransferase (EC 2.4.1.109) -}	{PF02815:MIR domain PF02366:Dolichyl-phosphate-mannose-protein mannosyltransferase }
A00487	{Contig10:941295:942789:+}	{KAG2153447.1; hypothetical protein EDB93DRAFT_1134961 [Suillus bovinus]}	{NA}	{mrr:Moror_6155; }	{NA}	{NA}	{NA}	{NA}	{NA}	{NA}	{NA}	{NA}	{NA}
A00488	{Contig10:943081:944158:-}	{KAG2142315.1; hypothetical protein EDB93DRAFT_1338483 [Suillus bovinus]}	{NA}	{sla:SERLADRAFT_444261; }	{NA}	{NA}	{GO:0055114; oxidation-reduction process; biological_process GO:0042602; flavin reductase activity; molecular_function GO:0016491; oxidoreductase activity; molecular_function GO:0010181; FMN binding; molecular_function}	{NA}	{NA}	{NA}	{NA}	{NA}	{PF01613:Flavin reductase like domain}
A00489	{Contig10:945644:949893:+}	{KAG2153445.1; hypothetical protein EDB93DRAFT_1248718 [Suillus bovinus]}	{NA}	{NA}	{NA}	{NA}	{GO:0005515; protein binding; molecular_function}	{NA}	{NA}	{NA}	{NA}	{NA}	{PF00515:Tetratricopeptide repeat PF00400:WD domain, G-beta repeat PF13181:Tetratricopeptide repeat}
A00490	{Contig10:950757:951846:-}	{KAG2153444.1; hypothetical protein EDB93DRAFT_1248717 [Suillus bovinus]}	{NA}	{sla:SERLADRAFT_444261; }	{NA}	{NA}	{GO:0042602; flavin reductase activity; molecular_function GO:0016491; oxidoreductase activity; molecular_function GO:0010181; FMN binding; molecular_function GO:0055114; oxidation-reduction process; biological_process}	{NA}	{NA}	{NA}	{NA}	{NA}	{PF01613:Flavin reductase like domain}
A00491	{Contig10:953325:957675:+}	{KAG2153443.1; hypothetical protein EDB93DRAFT_1248716 [Suillus bovinus]}	{NA}	{NA}	{NA}	{NA}	{GO:0005515; protein binding; molecular_function}	{NA}	{NA}	{NA}	{NA}	{NA}	{PF00400:WD domain, G-beta repeat PF13176:Tetratricopeptide repeat PF00515:Tetratricopeptide repeat PF13181:Tetratricopeptide repeat}
A00492	{Contig10:103781:104680:-}	{KAG2123304.1; hypothetical protein EDB93DRAFT_1259124 [Suillus bovinus]}	{NA}	{NA}	{NA}	{NA}	{NA}	{NA}	{NA}	{NA}	{NA}	{NA}	{NA}
A00493	{Contig10:959265:959946:+}	{KAG2158696.1; hypothetical protein EDB93DRAFT_1119872 [Suillus bovinus]}	{NA}	{NA}	{NA}	{NA}	{NA}	{NA}	{NA}	{NA}	{NA}	{NA}	{NA}
A00494	{Contig10:961074:965175:-}	{KAG2137112.1; hypothetical protein EDB93DRAFT_1330714 [Suillus bovinus]}	{NA}	{NA}	{NA}	{NA}	{GO:0005515; protein binding; molecular_function}	{NA}	{NA}	{NA}	{NA}	{NA}	{PF00400:WD domain, G-beta repeat PF13176:Tetratricopeptide repeat PF00515:Tetratricopeptide repeat}
A00495	{Contig10:966031:969968:-}	{KAG2137113.1; hypothetical protein EDB93DRAFT_1253727 [Suillus bovinus]}	{NA}	{NA}	{NA}	{NA}	{GO:0005515; protein binding; molecular_function}	{NA}	{NA}	{NA}	{NA}	{NA}	{PF00515:Tetratricopeptide repeat PF13176:Tetratricopeptide repeat PF00400:WD domain, G-beta repeat PF13181:Tetratricopeptide repeat}
A00496	{Contig10:971711:976033:+}	{KAG2137114.1; hypothetical protein EDB93DRAFT_1253728 [Suillus bovinus]}	{NA}	{NA}	{NA}	{NA}	{GO:0005515; protein binding; molecular_function}	{NA}	{NA}	{NA}	{NA}	{NA}	{PF13181:Tetratricopeptide repeat PF00515:Tetratricopeptide repeat PF13176:Tetratricopeptide repeat PF00400:WD domain, G-beta repeat}
A00497	{Contig10:977344:977793:+}	{KAG1859981.1; hypothetical protein C8R48DRAFT_605470 [Suillus tomentosus]}	{NA}	{lbc:LACBIDRAFT_325912; }	{NA}	{NA}	{GO:0004190; aspartic-type endopeptidase activity; molecular_function GO:0009877; nodulation; biological_process GO:0016021; integral to membrane; cellular_component}	{NA}	{NA}	{NA}	{NA}	{NA}	{PF06635:Nodulation protein NolV PF01080:Presenilin}
A00498	{Contig10:978599:979360:+}	{OJA16495.1; hypothetical protein AZE42_13267, partial [Rhizopogon vesiculosus]}	{NA}	{NA}	{NA}	{NA}	{NA}	{NA}	{NA}	{NA}	{NA}	{NA}	{NA}
A00499	{Contig10:983803:987089:+}	{KIK47782.1; hypothetical protein CY34DRAFT_8650 [Suillus luteus UH-Slu-Lm8-n1]}	{NA}	{pco:PHACADRAFT_86707; }	{NA}	{NA}	{GO:0046983; protein dimerization activity; molecular_function}	{NA}	{NA}	{NA}	{NA}	{NA}	{PF05699:hAT family C-terminal dimerisation region}
A00500	{Contig10:989236:990766:+}	{KAG1787317.1; hypothetical protein HD556DRAFT_1312780 [Suillus plorans]}	{NA}	{NA}	{NA}	{NA}	{NA}	{NA}	{NA}	{NA}	{NA}	{NA}	{NA}
A00501	{Contig10:991563:995512:+}	{KIK36181.1; hypothetical protein CY34DRAFT_16557 [Suillus luteus UH-Slu-Lm8-n1]}	{NA}	{sla:SERLADRAFT_443527; }	{NA}	{NA}	{NA}	{NA}	{NA}	{NA}	{NA}	{NA}	{NA}
A00502	{Contig10:996299:1003481:-}	{KAG2056250.1; laccase [Suillus hirtellus]}	{Q12719; Laccase-4 }	{cput:CONPUDRAFT_140197; K19791 FET3_5 iron transport multicopper oxidase -- }	{NA}	{NA}	{GO:0008270; zinc ion binding; molecular_function GO:0005507; copper ion binding; molecular_function GO:0005524; ATP binding; molecular_function GO:0016491; oxidoreductase activity; molecular_function GO:0055114; oxidation-reduction process; biological_process GO:0005975; carbohydrate metabolic process; biological_process GO:0016832; aldehyde-lyase activity; molecular_function GO:0016887; ATPase …	{NA}	{NA}	{NA}	{YES}	{EGN96947.1_; AA1_1 }	{PF07732:Multicopper oxidase PF00394:Multicopper oxidase PF01116:Fructose-bisphosphate aldolase class-II PF00005:ABC transporter PF07731:Multicopper oxidase}
A00503	{Contig10:105095:108042:-}	{KAG2128340.1; hypothetical protein EDB93DRAFT_1256685 [Suillus bovinus]}	{NA}	{NA}	{NA}	{NA}	{NA}	{NA}	{NA}	{NA}	{NA}	{NA}	{NA}
A00504	{Contig10:1005019:1012230:-}	{KAG2137118.1; laccase [Suillus bovinus]}	{O59896; Laccase }	{cput:CONPUDRAFT_140197; K19791 FET3_5 iron transport multicopper oxidase -- }	{NA}	{NA}	{GO:0005507; copper ion binding; molecular_function GO:0055114; oxidation-reduction process; biological_process GO:0016491; oxidoreductase activity; molecular_function}	{NA}	{NA}	{NA}	{NA}	{EGN96947.1_; AA1_1 }	{PF07731:Multicopper oxidase PF00394:Multicopper oxidase PF07732:Multicopper oxidase}
A00505	{Contig10:1016114:1021492:+}	{KAG2137130.1; hypothetical protein EDB93DRAFT_1253740 [Suillus bovinus]}	{NA}	{NA}	{NA}	{NA}	{NA}	{NA}	{NA}	{NA}	{NA}	{NA}	{NA}
A00506	{Contig10:1027774:1034826:-}	{KAG2159005.1; CHAT domain-containing protein [Suillus bovinus]}	{NA}	{NA}	{NA}	{NA}	{GO:0015074; DNA integration; biological_process}	{NA}	{NA}	{NA}	{NA}	{NA}	{PF00665:Integrase core domain}
A00507	{Contig10:1035497:1036651:-}	{KAG1846631.1; hypothetical protein F4604DRAFT_1936295 [Suillus subluteus]}	{NA}	{NA}	{NA}	{NA}	{NA}	{NA}	{NA}	{NA}	{NA}	{NA}	{NA}
A00508	{Contig10:1038066:1039131:+}	{KAG2137133.1; hypothetical protein EDB93DRAFT_768339 [Suillus bovinus]}	{NA}	{NA}	{NA}	{NA}	{NA}	{NA}	{NA}	{NA}	{NA}	{NA}	{NA}
A00509	{Contig10:1039374:1045358:+}	{KAG2137134.1; P-loop containing nucleoside triphosphate hydrolase protein [Suillus bovinus]}	{P39109; Metal resistance protein YCF1 }	{sla:SERLADRAFT_440240; }	{YDR135c; KOG0054 Multidrug resistance-associated protein/mitoxantrone resistance protein, ABC superfamily Q Secondary metabolites biosynthesis, transport and catabolism ;}	{gnl|TC-DB|D2WF19; 3.A.1.208.32 ATP-binding cassette transporter 1 OS=Rhizophagus irregularis GN=ABC1 PE=2 SV=1}	{GO:0043531; ADP binding; molecular_function GO:0003924; GTPase activity; molecular_function GO:0051301; cell division; biological_process GO:0005524; ATP binding; molecular_function GO:0000166; nucleotide binding; molecular_function GO:0005525; GTP binding; molecular_function GO:0055085; transmembrane transport; biological_process GO:0007049; cell cycle; biological_process GO:0003677; DNA bindin…	{NA}	{NA}	{NA}	{NA}	{NA}	{PF00005:ABC transporter PF00350:Dynamin family PF03193:RsgA GTPase PF02096:60Kd inner membrane protein PF00664:ABC transporter transmembrane region PF01580:FtsK/SpoIIIE family PF00931:NB-ARC domain PF01926:50S ribosome-binding GTPase}
A00510	{Contig10:1045781:1047733:-}	{KAG2137135.1; Phosphoribosylaminoimidazole carboxylase [Suillus bovinus]}	{P0CQ36; Phosphoribosylaminoimidazole carboxylase }	{ppl:POSPLDRAFT_90700; K11808 ADE2 phosphoribosylaminoimidazole carboxylase 4.1.1.21 Metabolism; Nucleotide metabolism; Purine metabolism [PATH:ko00230] Metabolism; Global and overview maps; Metabolic pathways [PATH:ko01100] Metabolism; Global and overview maps; Biosynthesis of secondary metabolites [PATH:ko01110]}	{SPCC1322.13; KOG2835 Phosphoribosylamidoimidazole-succinocarboxamide synthase F Nucleotide transport and metabolism ;}	{NA}	{GO:0008716; D-alanine-D-alanine ligase activity; molecular_function GO:0006189; 'de novo' IMP biosynthetic process; biological_process GO:0046872; metal ion binding; molecular_function GO:0005524; ATP binding; molecular_function}	{PHI:14; P0C017 ADE2 5207 Cryptococcus neoformans Cryptococcosis Oryctolagus cuniculus (related: rabbit) Phosphoribosylaminoimidazole carboxylase gene disruption; gene complementation loss of pathogenicity}	{Q5ANJ5_CANAL; ADE2 EAL04254.1 568 Candida albicans 5476 CAUTION: The sequence shown here is derived from an EMBL/GenBank/DDBJ whole genome shotgun (WGS) entry which is preliminary data. 15123810 XP_722973.1, XM_717880.1, XP_723120.1, XM_718027.1 {ID:PF00731; Description: AIRC} {ID:PF02222; Description: AIRC} Isolated from a wide variety of substrates including humans animals invasive candidal di…	{NA}	{NA}	{NA}	{PF02655:ATP-grasp domain PF02786:Carbamoyl-phosphate synthase L chain, ATP binding domain PF00731:AIR carboxylase PF07478:D-ala D-ala ligase C-terminus}
A00511	{Contig10:1047866:1048528:+}	{KAG2137136.1; hypothetical protein EDB93DRAFT_1091317 [Suillus bovinus]}	{NA}	{cput:CONPUDRAFT_89449; }	{NA}	{NA}	{GO:0000398; nuclear mRNA splicing, via spliceosome; biological_process GO:0005681; spliceosomal complex; cellular_component}	{NA}	{NA}	{NA}	{NA}	{NA}	{PF04889:Cwf15/Cwc15 cell cycle control protein}
A00512	{Contig10:1049015:1053337:-}	{KAG2137137.1; hypothetical protein EDB93DRAFT_768478 [Suillus bovinus]}	{NA}	{hir:HETIRDRAFT_314688; }	{NA}	{NA}	{GO:0005515; protein binding; molecular_function GO:0007165; signal transduction; biological_process}	{NA}	{NA}	{NA}	{NA}	{NA}	{PF00018:SH3 domain PF00788:Ras association (RalGDS/AF-6) domain}
A00513	{Contig10:1053805:1056489:-}	{KAG2137138.1; cyclin-like protein [Suillus bovinus]}	{NA}	{sla:SERLADRAFT_344579; K15161 CCNC, SSN8 cyclin-C -- }	{NA}	{NA}	{GO:0017025; TBP-class protein binding; molecular_function}	{NA}	{NA}	{NA}	{NA}	{NA}	{PF00382:Transcription factor TFIIB repeat}
A00514	{Contig10:110471:111537:-}	{KAG2146690.1; hypothetical protein DEU56DRAFT_978561 [Suillus clintonianus]}	{NA}	{NA}	{NA}	{NA}	{NA}	{NA}	{NA}	{NA}	{NA}	{NA}	{NA}
A00515	{Contig10:1057950:1062274:+}	{KAG1900474.1; hypothetical protein F5891DRAFT_1278351 [Suillus fuscotomentosus]}	{NA}	{NA}	{NA}	{NA}	{GO:0043531; ADP binding; molecular_function GO:0005515; protein binding; molecular_function GO:0019079; viral genome replication; biological_process GO:0003723; RNA binding; molecular_function GO:0003724; RNA helicase activity; molecular_function}	{NA}	{NA}	{NA}	{NA}	{NA}	{PF01057:Parvovirus non-structural protein NS1 PF00910:RNA helicase PF00400:WD domain, G-beta repeat PF00931:NB-ARC domain}
A00516	{Contig10:1062720:1067062:-}	{KAG2137140.1; hypothetical protein EDB93DRAFT_1330725 [Suillus bovinus]}	{NA}	{NA}	{NA}	{NA}	{GO:0042802; identical protein binding; molecular_function GO:0005515; protein binding; molecular_function}	{NA}	{NA}	{NA}	{NA}	{NA}	{PF13181:Tetratricopeptide repeat PF07721:Tetratricopeptide repeat PF00400:WD domain, G-beta repeat PF00515:Tetratricopeptide repeat PF13176:Tetratricopeptide repeat}
A00517	{Contig10:1067800:1068570:+}	{KAG2137141.1; hypothetical protein EDB93DRAFT_768692 [Suillus bovinus]}	{NA}	{NA}	{NA}	{NA}	{NA}	{NA}	{NA}	{NA}	{NA}	{NA}	{NA}
A00518	{Contig10:1068810:1073332:-}	{KAG1776009.1; hypothetical protein EV702DRAFT_360672 [Suillus placidus]}	{Q10147; Probable T-complex protein 1 subunit beta }	{tvs:TRAVEDRAFT_144774; K09494 CCT2 T-complex protein 1 subunit beta -- }	{SPAC1D4.04; KOG0363 Chaperonin complex component, TCP-1 beta subunit (CCT2) O Posttranslational modification, protein turnover, chaperones ;}	{NA}	{GO:0005524; ATP binding; molecular_function GO:0044267; cellular protein metabolic process; biological_process}	{NA}	{NA}	{NA}	{NA}	{NA}	{PF00118:TCP-1/cpn60 chaperonin family}
A00519	{Contig10:1075379:1076977:-}	{KAG2137144.1; hypothetical protein EDB93DRAFT_1167720 [Suillus bovinus]}	{NA}	{NA}	{NA}	{NA}	{NA}	{NA}	{NA}	{NA}	{NA}	{NA}	{NA}
A00520	{Contig10:1077367:1078815:+}	{KAG1895871.1; PRTase-like protein [Suillus fuscotomentosus]}	{P18562; Uracil phosphoribosyltransferase }	{sla:SERLADRAFT_375218; K00761 upp, UPRT uracil phosphoribosyltransferase 2.4.2.9 Metabolism; Nucleotide metabolism; Pyrimidine metabolism [PATH:ko00240] Metabolism; Global and overview maps; Metabolic pathways [PATH:ko01100]}	{YHR128w; KOG4203 Armadillo/beta-Catenin/plakoglobin TZ Signal transduction mechanisms ; Cytoskeleton ;}	{NA}	{GO:0009116; nucleoside metabolic process; biological_process}	{NA}	{NA}	{NA}	{NA}	{NA}	{PF00156:Phosphoribosyl transferase domain}
A00521	{Contig10:1080448:1081268:-}	{KAG2137146.1; hypothetical protein EDB93DRAFT_1253755 [Suillus bovinus]}	{NA}	{NA}	{NA}	{NA}	{NA}	{NA}	{NA}	{NA}	{NA}	{NA}	{NA}
A00522	{Contig10:1083232:1084644:+}	{KAG2137147.1; Alpha/beta knot methyltransferase [Suillus bovinus]}	{Q9P8P7; Ribosomal RNA small subunit methyltransferase NEP1 }	{sla:SERLADRAFT_454381; K14568 EMG1, NEP1 rRNA small subunit pseudouridine methyltransferase Nep1 2.1.1.260 Genetic Information Processing; Translation; Ribosome biogenesis in eukaryotes [PATH:ko03008]}	{YLR186w; KOG3073 Protein required for 18S rRNA maturation and 40S ribosome biogenesis J Translation, ribosomal structure and biogenesis ;}	{NA}	{GO:0008168; methyltransferase activity; molecular_function}	{NA}	{NA}	{NA}	{NA}	{NA}	{PF03587:EMG1/NEP1 methyltransferase}
A00523	{Contig10:1085077:1086188:+}	{KAG2137148.1; CRAL-TRIO domain-containing protein [Suillus bovinus]}	{Q10137; Sec14 cytosolic factor }	{sla:SERLADRAFT_454384; }	{SPAC3H8.10; KOG1471 Phosphatidylinositol transfer protein SEC14 and related proteins I Lipid transport and metabolism ;}	{NA}	{GO:0015986; ATP synthesis coupled proton transport; biological_process GO:0042626; ATPase activity, coupled to transmembrane movement of substances; molecular_function GO:0033178; proton-transporting two-sector ATPase complex, catalytic domain; cellular_component}	{PHI:2841; F6K8L6 CnSEC14-2 5207 Cryptococcus neoformans No Data Found Mus musculus (related: house mouse) Secretion of phospholipase B1 gene disruption; gene complementation unaffected pathogenicity}	{A6ZMD8_YEAS7; SEC14 EDN64468.1 304 Saccharomyces cerevisiae 307796 SIMILARITY: Contains 1 CRAL-TRIO domain. 17652520 Unknown {ID:PF00650; Description: CRAL_TRIO} {ID:PF03765; Description: CRAL_TRIO} humans vertebrata occasional infection Occasional Infection {ID:0005622; Method: IEA:InterPro; Description: C:intracellular} {ID:0005215; Method: IEA:InterPro; Description: F:transporter activity}}	{NA}	{NA}	{NA}	{PF08112:ATP synthase epsilon subunit}
A00524	{Contig10:1086404:1089197:-}	{KAG2137149.1; hypothetical protein EDB93DRAFT_769323 [Suillus bovinus]}	{NA}	{NA}	{NA}	{NA}	{GO:0016567; protein ubiquitination; biological_process GO:0031386; NA GO:0005515; protein binding; molecular_function GO:0016881; acid-amino acid ligase activity; molecular_function}	{NA}	{NA}	{NA}	{NA}	{NA}	{PF00646:F-box domain PF08941:USP8 interacting}
A00525	{Contig10:111949:112647:+}	{KAG0692514.1; hypothetical protein DFH29DRAFT_817491, partial [Suillus ampliporus]}	{NA}	{lbc:LACBIDRAFT_328218; }	{NA}	{NA}	{NA}	{NA}	{NA}	{NA}	{NA}	{NA}	{NA}
A00526	{Contig10:1089858:1092515:-}	{KAG2137150.1; cytochrome P450 [Suillus bovinus]}	{F1SY74; Cytochrome P450 monooxygenase 75 }	{sla:SERLADRAFT_454388; }	{NA}	{NA}	{GO:0055114; oxidation-reduction process; biological_process GO:0020037; heme binding; molecular_function GO:0005506; iron ion binding; molecular_function GO:0016705; oxidoreductase activity, acting on paired donors, with incorporation or reduction of molecular oxygen; molecular_function}	{NA}	{NA}	{estExt_fgenesh1_pm.C_1_t10021; P450,CYP52 P450_Sl7.9158 http://p450.riceblast.snu.ac.kr/class.php?a=dv_sequence&id=46903&spe_id=393761&ref_id=61913}	{NA}	{NA}	{PF00067:Cytochrome P450}
A00527	{Contig10:1093358:1098484:-}	{KAG2137151.1; Alpha/Beta hydrolase protein [Suillus bovinus]}	{Q9Y707; Actin-2 }	{abp:AGABI1DRAFT112248; K05692 ACTB_G1 actin beta/gamma 1 -- Environmental Information Processing; Signal transduction; Rap1 signaling pathway [PATH:ko04015] Cellular Processes; Transport and catabolism; Phagosome [PATH:ko04145] Cellular Processes; Cell growth and death; Apoptosis [PATH:ko04210] Environmental Information Processing; Signal transduction; Hippo signaling pathway [PATH:ko04390] Envi…	{Hs4501887; KOG0676 Actin and related proteins Z Cytoskeleton ;}	{NA}	{GO:0008152; NA GO:0006508; proteolysis; biological_process GO:0008236; serine-type peptidase activity; molecular_function GO:0016787; hydrolase activity; molecular_function}	{NA}	{NA}	{NA}	{NA}	{NA}	{PF07859:alpha/beta hydrolase fold PF00326:Prolyl oligopeptidase family}
A00528	{Contig10:1098843:1099638:+}	{KAG2137153.1; hypothetical protein EDB93DRAFT_1167767 [Suillus bovinus]}	{NA}	{NA}	{NA}	{NA}	{GO:0004930; G-protein coupled receptor activity; molecular_function GO:0007186; G-protein coupled receptor protein signaling pathway; biological_process GO:0016021; integral to membrane; cellular_component}	{NA}	{NA}	{NA}	{NA}	{NA}	{PF00003:7 transmembrane sweet-taste receptor of 3 GCPR}
A00529	{Contig10:1102520:1104701:+}	{KAG2137155.1; laccase [Suillus bovinus]}	{Q12719; Laccase-4 }	{sla:SERLADRAFT_362736; K19791 FET3_5 iron transport multicopper oxidase -- }	{NA}	{NA}	{GO:0005507; copper ion binding; molecular_function GO:0055114; oxidation-reduction process; biological_process GO:0016491; oxidoreductase activity; molecular_function}	{NA}	{NA}	{NA}	{YES}	{EGN96947.1_; AA1_1 }	{PF07731:Multicopper oxidase PF00394:Multicopper oxidase PF07732:Multicopper oxidase}
A00530	{Contig10:1106678:1119642:-}	{KAG1760083.1; hypothetical protein EV702DRAFT_615110 [Suillus placidus]}	{NA}	{mrr:Moror_13685; }	{NA}	{NA}	{NA}	{NA}	{NA}	{NA}	{NA}	{NA}	{NA}
A00531	{Contig10:1122568:1123918:-}	{KAG2137163.1; phosphopantothenate-cysteine ligase [Suillus bovinus]}	{Q9USK7; Uncharacterized protein C4B3.18 }	{cci:CC1G_07662; K01922 PPCS, COAB phosphopantothenate---cysteine ligase (ATP) 6.3.2.51 Metabolism; Metabolism of cofactors and vitamins; Pantothenate and CoA biosynthesis [PATH:ko00770] Metabolism; Global and overview maps; Metabolic pathways [PATH:ko01100]}	{SPCC4B3.18; KOG2728 Uncharacterized conserved protein with similarity to phosphopantothenoylcysteine synthetase/decarboxylase R General function prediction only ;}	{NA}	{NA}	{NA}	{NA}	{NA}	{NA}	{NA}	{NA}
A00532	{Contig10:1127010:1128060:-}	{KAG2137165.1; hypothetical protein EDB93DRAFT_1167834 [Suillus bovinus]}	{NA}	{NA}	{NA}	{NA}	{GO:0008289; lipid binding; molecular_function GO:0016021; integral to membrane; cellular_component GO:0006869; lipid transport; biological_process GO:0042157; lipoprotein metabolic process; biological_process GO:0005576; NA}	{NA}	{NA}	{NA}	{NA}	{NA}	{PF01442:Apolipoprotein A1/A4/E domain PF07464:Apolipophorin-III precursor (apoLp-III) PF06140:Interferon-induced 6-16 family }
A00533	{Contig10:1128490:1129684:-}	{KAG2035348.1; hypothetical protein BDR03DRAFT_962855 [Suillus americanus]}	{NA}	{NA}	{NA}	{NA}	{GO:0016021; integral to membrane; cellular_component GO:0051304; chromosome separation; biological_process}	{NA}	{NA}	{NA}	{YES}	{NA}	{PF04079:Segregation and condensation complex subunit ScpB PF06140:Interferon-induced 6-16 family }
A00534	{Contig10:1130047:1130936:+}	{KAG2130440.1; SCO1/SenC-domain-containing protein [Suillus bovinus]}	{P23833; Protein SCO1, mitochondrial }	{sla:SERLADRAFT_454418; K07152 SCO1_2 protein SCO1/2 -- }	{YBR037c; KOG2792 Putative cytochrome C oxidase assembly protein C Energy production and conversion ;}	{NA}	{GO:0016491; oxidoreductase activity; molecular_function GO:0016209; NA GO:0055114; oxidation-reduction process; biological_process}	{NA}	{NA}	{NA}	{NA}	{NA}	{PF00578:AhpC/TSA family}
A00535	{Contig10:1131069:1132815:-}	{KAG2130442.1; hypothetical protein EDB93DRAFT_1234060 [Suillus bovinus]}	{P55034; 26S proteasome non-ATPase regulatory subunit 4 homolog }	{sla:SERLADRAFT_353493; K03029 PSMD4, RPN10 26S proteasome regulatory subunit N10 -- Genetic Information Processing; Folding, sorting and degradation; Proteasome [PATH:ko03050] Human Diseases; Infectious diseases: Viral; Epstein-Barr virus infection [PATH:ko05169]}	{At4g38630; KOG2884 26S proteasome regulatory complex, subunit RPN10/PSMD4 O Posttranslational modification, protein turnover, chaperones ;}	{NA}	{GO:0005739; mitochondrion; cellular_component GO:0008137; NADH dehydrogenase (ubiquinone) activity; molecular_function GO:0003954; NADH dehydrogenase activity; molecular_function}	{NA}	{NA}	{NA}	{NA}	{NA}	{PF05676:NADH-ubiquinone oxidoreductase B18 subunit (NDUFB7)}
A00536	{Contig10:115790:118625:-}	{KAG1736066.1; hypothetical protein EDD22DRAFT_959838 [Suillus occidentalis]}	{NA}	{NA}	{NA}	{NA}	{NA}	{NA}	{NA}	{NA}	{NA}	{NA}	{NA}
A00537	{Contig10:1133679:1134388:+}	{KAG2130443.1; hypothetical protein EDB93DRAFT_79197 [Suillus bovinus]}	{NA}	{sla:SERLADRAFT_454412; }	{NA}	{NA}	{NA}	{NA}	{NA}	{NA}	{NA}	{NA}	{NA}
A00538	{Contig10:1134668:1135389:-}	{KAG2130444.1; hypothetical protein EDB93DRAFT_79288 [Suillus bovinus]}	{NA}	{NA}	{NA}	{NA}	{NA}	{NA}	{NA}	{NA}	{NA}	{NA}	{NA}
A00539	{Contig10:1137784:1139955:-}	{KAG2130445.1; laccase [Suillus bovinus]}	{Q99056; Laccase-5 }	{sla:SERLADRAFT_361477; K19791 FET3_5 iron transport multicopper oxidase -- }	{NA}	{NA}	{GO:0016491; oxidoreductase activity; molecular_function GO:0055114; oxidation-reduction process; biological_process GO:0005507; copper ion binding; molecular_function}	{NA}	{NA}	{NA}	{YES}	{EGN96947.1_; AA1_1 }	{PF07732:Multicopper oxidase PF00394:Multicopper oxidase PF07731:Multicopper oxidase}
A00540	{Contig10:1141350:1143511:-}	{KAG2130446.1; laccase [Suillus bovinus]}	{Q99056; Laccase-5 }	{cput:CONPUDRAFT_140197; K19791 FET3_5 iron transport multicopper oxidase -- }	{NA}	{NA}	{GO:0005507; copper ion binding; molecular_function GO:0055114; oxidation-reduction process; biological_process GO:0016491; oxidoreductase activity; molecular_function}	{NA}	{NA}	{NA}	{YES}	{ALT22027.1_; AA1_1 }	{PF07731:Multicopper oxidase PF00394:Multicopper oxidase PF07732:Multicopper oxidase}
A00541	{Contig10:1148408:1151161:+}	{KAG1856298.1; hypothetical protein C8R48DRAFT_776120 [Suillus tomentosus]}	{NA}	{NA}	{NA}	{NA}	{GO:0008811; chloramphenicol O-acetyltransferase activity; molecular_function GO:0003676; nucleic acid binding; molecular_function GO:0003712; transcription cofactor activity; molecular_function GO:0006355; regulation of transcription, DNA-dependent; biological_process GO:0005622; intracellular; cellular_component}	{NA}	{NA}	{NA}	{NA}	{NA}	{PF02172:KIX domain PF00570:HRDC domain PF00302:Chloramphenicol acetyltransferase}
A00542	{Contig10:1155141:1157458:-}	{KAG2130450.1; hypothetical protein EDB93DRAFT_1108380 [Suillus bovinus]}	{NA}	{NA}	{NA}	{NA}	{NA}	{NA}	{NA}	{NA}	{NA}	{NA}	{NA}
A00543	{Contig10:1157495:1158461:-}	{KAG2130451.1; CGI-121-domain-containing protein [Suillus bovinus]}	{NA}	{hir:HETIRDRAFT_314488; K15901 CGI121, TPRKB EKC/KEOPS complex subunit CGI121/TPRKB -- }	{NA}	{NA}	{NA}	{NA}	{NA}	{NA}	{NA}	{NA}	{NA}
A00544	{Contig10:1158622:1162412:+}	{KAG2130452.1; thioredoxin-like protein [Suillus bovinus]}	{NA}	{sla:SERLADRAFT_454425; }	{NA}	{NA}	{GO:0045454; cell redox homeostasis; biological_process}	{NA}	{NA}	{NA}	{YES}	{NA}	{PF00085:Thioredoxin}
A00545	{Contig10:1164750:1168780:-}	{KAG2130454.1; hypothetical protein EDB93DRAFT_79940 [Suillus bovinus]}	{NA}	{sla:SERLADRAFT_404448; }	{NA}	{NA}	{GO:0042802; identical protein binding; molecular_function}	{NA}	{NA}	{NA}	{NA}	{NA}	{PF07721:Tetratricopeptide repeat}
A00546	{Contig10:1169672:1171236:-}	{KAG2130455.1; hypothetical protein EDB93DRAFT_1180108 [Suillus bovinus]}	{NA}	{sla:SERLADRAFT_431589; }	{NA}	{NA}	{GO:0005634; nucleus; cellular_component GO:0005737; cytoplasm; cellular_component GO:0008092; cytoskeletal protein binding; molecular_function GO:0019898; extrinsic to membrane; cellular_component GO:0006270; DNA-dependent DNA replication initiation; biological_process}	{NA}	{NA}	{NA}	{NA}	{NA}	{PF04921:XAP5, circadian clock regulator PF02724:CDC45-like protein PF00769:Ezrin/radixin/moesin family}
A00547	{Contig10:119008:122661:-}	{KAG2151046.1; hypothetical protein EDB93DRAFT_1083581 [Suillus bovinus]}	{NA}	{sla:SERLADRAFT_443529; }	{NA}	{NA}	{GO:0016987; sigma factor activity; molecular_function GO:0003700; sequence-specific DNA binding transcription factor activity; molecular_function GO:0003677; DNA binding; molecular_function GO:0006352; transcription initiation, DNA-dependent; biological_process GO:0006355; regulation of transcription, DNA-dependent; biological_process}	{NA}	{NA}	{NA}	{NA}	{NA}	{PF04546:Sigma-70, non-essential region}
A00548	{Contig10:1171602:1174066:+}	{KAG2130456.1; translocation protein sec63 [Suillus bovinus]}	{NA}	{cput:CONPUDRAFT_102704; K09540 SEC63, DNAJC23 translocation protein SEC63 -- Genetic Information Processing; Folding, sorting and degradation; Protein export [PATH:ko03060] Genetic Information Processing; Folding, sorting and degradation; Protein processing in endoplasmic reticulum [PATH:ko04141]}	{NA}	{NA}	{NA}	{NA}	{NA}	{NA}	{NA}	{NA}	{NA}
A00549	{Contig10:1174106:1174735:-}	{KAG2130457.1; Pre-rRNA-processing protein TSR2-domain-containing protein [Suillus bovinus]}	{NA}	{sla:SERLADRAFT_342924; K14800 TSR2 pre-rRNA-processing protein TSR2 -- }	{NA}	{NA}	{GO:0045893; positive regulation of transcription, DNA-dependent; biological_process GO:0005634; nucleus; cellular_component}	{NA}	{NA}	{NA}	{YES}	{NA}	{PF04813:Hepatocyte nuclear factor 1 (HNF-1), alpha isoform C terminus}
A00550	{Contig10:1175297:1176550:-}	{KAG1811247.1; eukaryotic translation initiation factor 3 subunit G-domain-containing protein [Suillus subaureus]}	{Q4P7G1; Eukaryotic translation initiation factor 3 subunit G }	{sla:SERLADRAFT_456184; K03248 EIF3G translation initiation factor 3 subunit G -- Genetic Information Processing; Translation; RNA transport [PATH:ko03013]}	{SPBC18H10.03; KOG0122 Translation initiation factor 3, subunit g (eIF-3g) J Translation, ribosomal structure and biogenesis ;}	{NA}	{GO:0004484; mRNA guanylyltransferase activity; molecular_function GO:0003676; nucleic acid binding; molecular_function}	{PHI:2545; Q4X1I3 TIF35 746128 Aspergillus fumigatus Invasive Pulmonary Aspergillosis Lethal pathogen phenotype Translation initiation factor eIF3 altered gene expression / gene regulation lethal}	{C0S2X7_PARBP; PABG_02041 EEH19782.1 323 Paracoccidioides brasiliensis 482561 FUNCTION: Component of the eukaryotic translation initiation factor 3 (eIF-3) complex (By similarity).; SUBCELLULAR LOCATION: Cytoplasm (By similarity).; SIMILARITY: Belongs to the eIF-3 subunit G family.; SIMILARITY: Contains 1 RRM (RNA recognition motif) domain. Unknown Unknown {ID:PF00076; Description: RRM_1} humans …	{NA}	{NA}	{NA}	{PF00076:RNA recognition motif. (a.k.a. RRM, RBD, or RNP domain) PF03919:mRNA capping enzyme, C-terminal domain}
A00551	{Contig10:1176799:1177303:+}	{KAG1785929.1; 60s acidic ribosomal protein-domain-containing protein, partial [Suillus plorans]}	{P17476; 60S acidic ribosomal protein P1-alpha 1 }	{ppl:POSPLDRAFT_114189; K02942 RP-LP1, RPLP1 large subunit ribosomal protein LP1 -- Genetic Information Processing; Translation; Ribosome [PATH:ko03010]}	{SPAC644.15; KOG1762 60s acidic ribosomal protein P1 J Translation, ribosomal structure and biogenesis ;}	{NA}	{GO:0055114; oxidation-reduction process; biological_process GO:0006414; translational elongation; biological_process GO:0005840; ribosome; cellular_component GO:0006546; glycine catabolic process; biological_process GO:0004375; glycine dehydrogenase (decarboxylating) activity; molecular_function GO:0003735; structural constituent of ribosome; molecular_function GO:0005622; intracellular; cellula…	{NA}	{NA}	{NA}	{NA}	{NA}	{PF02347:Glycine cleavage system P-protein PF00428:60s Acidic ribosomal protein}
A00552	{Contig10:1177915:1179031:+}	{KAG1893080.1; 20S proteasome subunit [Suillus fuscotomentosus]}	{Q9QUM9; Proteasome subunit alpha type-6 }	{gtr:GLOTRDRAFT_33056; K02730 PSMA6 20S proteasome subunit alpha 1 3.4.25.1 Genetic Information Processing; Folding, sorting and degradation; Proteasome [PATH:ko03050]}	{Hs14749945; KOG0182 20S proteasome, regulatory subunit alpha type PSMA6/SCL1 O Posttranslational modification, protein turnover, chaperones ;}	{NA}	{GO:0051603; proteolysis involved in cellular protein catabolic process; biological_process GO:0019773; proteasome core complex, alpha-subunit complex; cellular_component GO:0004175; endopeptidase activity; molecular_function GO:0004298; threonine-type endopeptidase activity; molecular_function GO:0006511; ubiquitin-dependent protein catabolic process; biological_process GO:0005839; proteasome co…	{NA}	{NA}	{NA}	{NA}	{NA}	{PF10584:Proteasome subunit A N-terminal signature PF00227:Proteasome subunit}
A00553	{Contig10:1179209:1179542:-}	{KAG2130461.1; hypothetical protein EDB93DRAFT_1255864 [Suillus bovinus]}	{NA}	{scm:SCHCODRAFT_114714; K17417 YMR31 small subunit ribosomal protein YMR-31 -- }	{NA}	{NA}	{NA}	{NA}	{NA}	{NA}	{NA}	{NA}	{NA}
A00554	{Contig10:1179774:1181875:+}	{KAG2130462.1; guanine nucleotide exchange factor [Suillus bovinus]}	{NA}	{sla:SERLADRAFT_446375; }	{NA}	{NA}	{NA}	{NA}	{NA}	{NA}	{NA}	{NA}	{NA}
A00555	{Contig10:1182126:1183953:-}	{KAG2130463.1; hypothetical protein EDB93DRAFT_1234101 [Suillus bovinus]}	{P41891; Protein gar2 }	{cci:CC1G_00465; K11294 NCL, NSR1 nucleolin -- Human Diseases; Infectious diseases: Bacterial; Pathogenic Escherichia coli infection [PATH:ko05130]}	{SPAC140.02; KOG4210 Nuclear localization sequence binding protein K Transcription ;}	{NA}	{GO:0003676; nucleic acid binding; molecular_function}	{NA}	{NA}	{NA}	{NA}	{NA}	{PF00076:RNA recognition motif. (a.k.a. RRM, RBD, or RNP domain)}
A00556	{Contig10:1184122:1185793:+}	{KAG2130464.1; FAD/NAD-P-binding domain-containing protein [Suillus bovinus]}	{NA}	{gtr:GLOTRDRAFT_136534; }	{NA}	{NA}	{NA}	{NA}	{NA}	{NA}	{NA}	{NA}	{NA}
A00557	{Contig10:1190495:1192847:-}	{XP_027616715.1; predicted protein [Sparassis crispa]}	{NA}	{abv:AGABI2DRAFT176739; }	{NA}	{NA}	{GO:0015074; DNA integration; biological_process}	{NA}	{NA}	{NA}	{NA}	{NA}	{PF00665:Integrase core domain}
A00558	{Contig10:123493:127057:+}	{NA}	{NA}	{NA}	{NA}	{NA}	{GO:0009378; four-way junction helicase activity; molecular_function GO:0005524; ATP binding; molecular_function GO:0006281; DNA repair; biological_process GO:0003678; DNA helicase activity; molecular_function GO:0006310; DNA recombination; biological_process}	{NA}	{NA}	{NA}	{NA}	{NA}	{PF05496:Holliday junction DNA helicase RuvB P-loop domain PF00004:ATPase family associated with various cellular activities (AAA) PF06068:TIP49 P-loop domain}
A00559	{Contig10:1200713:1201211:-}	{KAG2150313.1; hypothetical protein EDB93DRAFT_1103535 [Suillus bovinus]}	{NA}	{NA}	{NA}	{NA}	{NA}	{NA}	{NA}	{NA}	{NA}	{NA}	{NA}
A00560	{Contig10:1208510:1209567:+}	{KAG2150315.1; solute carrier family 25 member 38 [Suillus bovinus]}	{B0DK57; Mitochondrial glycine transporter }	{lbc:LACBIDRAFT_191230; K15118 SLC25A38 solute carrier family 25, member 38 -- }	{NA}	{NA}	{NA}	{NA}	{NA}	{NA}	{NA}	{NA}	{NA}
A00561	{Contig10:1209873:1211521:-}	{KAG2150316.1; acyl-CoA dehydrogenase/oxidase [Suillus bovinus]}	{P70584; Short/branched chain specific acyl-CoA dehydrogenase, mitochondrial }	{sla:SERLADRAFT_460044; }	{Hs4501859; KOG0139 Short-chain acyl-CoA dehydrogenase I Lipid transport and metabolism ;}	{NA}	{GO:0016491; oxidoreductase activity; molecular_function GO:0008152; NA GO:0003995; acyl-CoA dehydrogenase activity; molecular_function GO:0055114; oxidation-reduction process; biological_process GO:0050660; flavin adenine dinucleotide binding; molecular_function GO:0016627; oxidoreductase activity, acting on the CH-CH group of donors; molecular_function}	{PHI:8928; G4NFW7 MoSCAD2 (MGG_08690) 318829 Magnaporthe oryzae Rice Blast Oryza sativa (related: rice) 3-Hydroxy acylCoA dehydrogenase Gene deletion: full; gene complementation loss of pathogenicity}	{NA}	{NA}	{NA}	{NA}	{PF08028:Acyl-CoA dehydrogenase, C-terminal domain PF02771:Acyl-CoA dehydrogenase, N-terminal domain PF02770:Acyl-CoA dehydrogenase, middle domain PF00441:Acyl-CoA dehydrogenase, C-terminal domain}
A00562	{Contig10:1211919:1214175:-}	{KAG2150317.1; hypothetical protein EDB93DRAFT_345628 [Suillus bovinus]}	{O42947; Uncharacterized protein C16H5.12c }	{dsq:DICSQDRAFT_84063; }	{NA}	{NA}	{GO:0016787; hydrolase activity; molecular_function GO:0003676; nucleic acid binding; molecular_function}	{NA}	{NA}	{NA}	{NA}	{NA}	{PF00076:RNA recognition motif. (a.k.a. RRM, RBD, or RNP domain) PF00149:Calcineurin-like phosphoesterase}
A00563	{Contig10:1214708:1219378:+}	{KAG2150318.1; mediator complex subunit 13 C-terminal-domain-containing protein [Suillus bovinus]}	{NA}	{sla:SERLADRAFT_434909; K15165 SSN2, MED13 mediator of RNA polymerase II transcription subunit 13, fungi type -- }	{NA}	{NA}	{GO:0006357; regulation of transcription from RNA polymerase II promoter; biological_process GO:0016592; mediator complex; cellular_component GO:0001104; RNA polymerase II transcription cofactor activity; molecular_function}	{NA}	{NA}	{NA}	{NA}	{NA}	{PF06333:Mediator complex subunit 13 C-terminal domain}
A00564	{Contig10:1219616:1220614:-}	{KAG2150319.1; hypothetical protein EDB93DRAFT_1328085 [Suillus bovinus]}	{NA}	{sla:SERLADRAFT_366665; }	{NA}	{NA}	{NA}	{NA}	{NA}	{NA}	{NA}	{NA}	{NA}
A00565	{Contig10:1221722:1224214:-}	{KAG2150321.1; hypothetical protein EDB93DRAFT_1142777 [Suillus bovinus]}	{NA}	{sla:SERLADRAFT_413658; }	{NA}	{NA}	{GO:0004806; triglyceride lipase activity; molecular_function GO:0006629; lipid metabolic process; biological_process}	{NA}	{NA}	{NA}	{NA}	{QRW15728.1_; GH12 endoglucanase (EC 3.2.1.4); xyloglucan hydrolase (EC 3.2.1.151); beta-1,3-1,4-glucanase (EC 3.2.1.73); xyloglucan endotransglycosylase (EC 2.4.1.207) -}	{PF01764:Lipase (class 3)}
A00566	{Contig10:1224713:1226978:+}	{KAG2345012.1; peptidase M24 [Suillus weaverae]}	{NA}	{cput:CONPUDRAFT_143630; K18573 ICP55 intermediate cleaving peptidase 55 3.4.11.26 }	{NA}	{NA}	{GO:0030145; manganese ion binding; molecular_function GO:0004177; aminopeptidase activity; molecular_function}	{NA}	{NA}	{NA}	{NA}	{NA}	{PF05195:Aminopeptidase P, N-terminal domain}
A00567	{Contig10:1227062:1232491:-}	{KAG2150323.1; hypothetical protein EDB93DRAFT_1103543 [Suillus bovinus]}	{Q10251; Eukaryotic translation initiation factor 5B }	{gtr:GLOTRDRAFT_136529; K03243 EIF5B translation initiation factor 5B -- Genetic Information Processing; Translation; RNA transport [PATH:ko03013]}	{SPAC56F8.03; KOG1144 Translation initiation factor 5B (eIF-5B) J Translation, ribosomal structure and biogenesis ;}	{NA}	{GO:0000166; nucleotide binding; molecular_function GO:0015171; amino acid transmembrane transporter activity; molecular_function GO:0003924; GTPase activity; molecular_function GO:0005622; intracellular; cellular_component GO:0055085; transmembrane transport; biological_process GO:0005525; GTP binding; molecular_function GO:0016020; membrane; cellular_component GO:0006810; transport; biological_…	{NA}	{NA}	{NA}	{NA}	{NA}	{PF03193:RsgA GTPase PF00324:Amino acid permease PF03029:Conserved hypothetical ATP binding protein PF08477:Ras of Complex, Roc, domain of DAPkinase PF13520:Amino acid permease PF01926:50S ribosome-binding GTPase PF03144:Elongation factor Tu domain 2 PF00071:Ras family PF00009:Elongation factor Tu GTP binding domain}
A00568	{Contig10:1232574:1233394:-}	{NA}	{NA}	{NA}	{NA}	{NA}	{NA}	{NA}	{NA}	{NA}	{NA}	{NA}	{NA}
A00569	{Contig10:12667:12891:-}	{NA}	{NA}	{NA}	{NA}	{NA}	{NA}	{NA}	{NA}	{NA}	{NA}	{NA}	{NA}
A00570	{Contig10:127097:127612:+}	{KAG2151043.1; hypothetical protein EDB93DRAFT_1276973 [Suillus bovinus]}	{NA}	{NA}	{NA}	{NA}	{NA}	{NA}	{NA}	{NA}	{NA}	{NA}	{NA}
A00571	{Contig10:1235376:1236247:+}	{KAG2070011.1; ARF/SAR superfamily [Suillus decipiens]}	{Q2TA37; ADP-ribosylation factor-like protein 2 }	{sla:SERLADRAFT_460023; K07943 ARL2 ADP-ribosylation factor-like protein 2 -- }	{Hs4502229; KOG0073 GTP-binding ADP-ribosylation factor-like protein ARL2 UZ Intracellular trafficking, secretion, and vesicular transport ; Cytoskeleton ;}	{NA}	{GO:0031683; G-protein beta/gamma-subunit complex binding; molecular_function GO:0005525; GTP binding; molecular_function GO:0003924; GTPase activity; molecular_function GO:0005622; intracellular; cellular_component GO:0015684; ferrous iron transport; biological_process GO:0007264; small GTPase mediated signal transduction; biological_process GO:0007186; G-protein coupled receptor protein signali…	{PHI:9550; A0A2L1CF02 Mocin4 318829 Magnaporthe oryzae Rice Blast Hordeum vulgare (related: barley) Arf family GTPase gene deletion: full; gene complementation reduced virulence}	{NA}	{NA}	{NA}	{NA}	{PF01926:50S ribosome-binding GTPase PF00503:G-protein alpha subunit PF02421:Ferrous iron transport protein B PF00025:ADP-ribosylation factor family PF00071:Ras family PF08477:Ras of Complex, Roc, domain of DAPkinase}
A00572	{Contig10:1237994:1239909:+}	{KAG2150325.1; Mycolic acid cyclopropane synthetase-domain-containing protein [Suillus bovinus]}	{NA}	{sla:SERLADRAFT_491524; K00574 cfa cyclopropane-fatty-acyl-phospholipid synthase 2.1.1.79 }	{NA}	{NA}	{GO:0008168; methyltransferase activity; molecular_function GO:0008152; NA GO:0008610; lipid biosynthetic process; biological_process}	{NA}	{NA}	{NA}	{NA}	{NA}	{PF02353:Mycolic acid cyclopropane synthetase PF08241:Methyltransferase domain PF05175:Methyltransferase small domain}
A00573	{Contig10:1241535:1247304:-}	{KAG2150326.1; hypothetical protein EDB93DRAFT_346467 [Suillus bovinus]}	{O43896; Kinesin-like protein KIF1C }	{sla:SERLADRAFT_354579; K10392 KIF1 kinesin family member 1 -- }	{Hs22065600; KOG0245 Kinesin-like protein Z Cytoskeleton ;}	{NA}	{GO:0005524; ATP binding; molecular_function GO:0005515; protein binding; molecular_function GO:0003777; microtubule motor activity; molecular_function GO:0008017; microtubule binding; molecular_function GO:0007018; microtubule-based movement; biological_process}	{PHI:7358; Q86ZB5 KLP7 40559 Botrytis cinerea Grey Mold Fungus Cicer arietinum (related: Chickpea) Kinesin-like protein Gene disruption; Gene complementation reduced virulence}	{NA}	{NA}	{NA}	{NA}	{PF00498:FHA domain PF00225:Kinesin motor domain}
A00574	{Contig10:1249040:1249733:-}	{KAG1787658.1; alpha-L RNA-binding motif-containing protein [Suillus plorans]}	{P32899; U3 small nucleolar ribonucleoprotein protein IMP3 }	{cput:CONPUDRAFT_136710; K14560 IMP3 U3 small nucleolar ribonucleoprotein protein IMP3 -- Genetic Information Processing; Translation; Ribosome biogenesis in eukaryotes [PATH:ko03008]}	{YHR148w; KOG4655 U3 small nucleolar ribonucleoprotein (snoRNP) component A RNA processing and modification ;}	{NA}	{GO:0005622; intracellular; cellular_component GO:0019843; rRNA binding; molecular_function GO:0003723; RNA binding; molecular_function}	{NA}	{NA}	{NA}	{NA}	{NA}	{PF00163:Ribosomal protein S4/S9 N-terminal domain PF01479:S4 domain}
A00575	{Contig10:1250074:1253057:+}	{KAG1759072.1; LIM-domain binding protein-domain-containing protein [Suillus occidentalis]}	{NA}	{lbc:LACBIDRAFT_294912; }	{NA}	{NA}	{GO:0009094; L-phenylalanine biosynthetic process; biological_process GO:0004664; prephenate dehydratase activity; molecular_function}	{NA}	{NA}	{NA}	{NA}	{NA}	{PF00800:Prephenate dehydratase}
A00576	{Contig10:1253369:1256619:-}	{KAG2150329.1; hypothetical protein EDB93DRAFT_1084239 [Suillus bovinus]}	{NA}	{sla:SERLADRAFT_446355; }	{NA}	{NA}	{GO:0005634; nucleus; cellular_component GO:0003677; DNA binding; molecular_function GO:0006351; transcription, DNA-dependent; biological_process GO:0005515; protein binding; molecular_function}	{NA}	{NA}	{NA}	{NA}	{NA}	{PF08711:TFIIS helical bundle-like domain PF00435:Spectrin repeat}
A00577	{Contig10:1257201:1258234:+}	{KAG2150330.1; hypothetical protein EDB93DRAFT_1142864 [Suillus bovinus]}	{NA}	{NA}	{NA}	{NA}	{GO:0005634; nucleus; cellular_component GO:0008270; zinc ion binding; molecular_function GO:0003677; DNA binding; molecular_function GO:0016818; hydrolase activity, acting on acid anhydrides, in phosphorus-containing anhydrides; molecular_function GO:0005524; ATP binding; molecular_function GO:0006355; regulation of transcription, DNA-dependent; biological_process}	{PHI:1470; Q4IQX3 GzHMG002 5518 Fusarium graminearum Fusarium Ear Blight Triticum (related: wheat) transcription factor gene deletion reduced virulence}	{NA}	{NA}	{NA}	{NA}	{PF08073:CHDNT (NUC034) domain}
A00578	{Contig10:1258767:1259410:+}	{KAG2150331.1; hypothetical protein EDB93DRAFT_346750 [Suillus bovinus]}	{NA}	{tvs:TRAVEDRAFT_27567; }	{NA}	{NA}	{NA}	{NA}	{NA}	{NA}	{NA}	{NA}	{NA}
A00579	{Contig10:1260703:1264172:+}	{KAG2150333.1; hypothetical protein EDB93DRAFT_1142868 [Suillus bovinus]}	{NA}	{NA}	{NA}	{NA}	{NA}	{NA}	{NA}	{NA}	{NA}	{NA}	{NA}
A00580	{Contig10:1265952:1268814:+}	{KAG2150335.1; Alpha/Beta hydrolase protein [Suillus bovinus]}	{NA}	{sla:SERLADRAFT_458341; }	{NA}	{NA}	{GO:0016787; hydrolase activity; molecular_function GO:0008152; NA}	{NA}	{NA}	{NA}	{NA}	{NA}	{PF07859:alpha/beta hydrolase fold}
A00581	{Contig10:129765:130992:+}	{KAG2128341.1; hypothetical protein EDB93DRAFT_1243572 [Suillus bovinus]}	{NA}	{lbc:LACBIDRAFT_314794; }	{NA}	{NA}	{NA}	{NA}	{NA}	{NA}	{NA}	{NA}	{NA}
A00582	{Contig10:1269174:1272012:-}	{KAG1837767.1; hypothetical protein F4604DRAFT_1942039 [Suillus subluteus]}	{NA}	{NA}	{NA}	{NA}	{NA}	{NA}	{NA}	{NA}	{NA}	{NA}	{NA}
A00583	{Contig10:1272035:1272586:-}	{KAG2131276.1; hypothetical protein EDB93DRAFT_1255616 [Suillus bovinus]}	{NA}	{NA}	{NA}	{NA}	{GO:0015979; photosynthesis; biological_process GO:0055114; oxidation-reduction process; biological_process GO:0015995; chlorophyll biosynthetic process; biological_process GO:0016491; oxidoreductase activity; molecular_function}	{NA}	{NA}	{NA}	{NA}	{NA}	{PF08369:Proto-chlorophyllide reductase 57 kD subunit}
A00584	{Contig10:1272753:1276288:+}	{KAG1743374.1; hypothetical protein EDD22DRAFT_958799 [Suillus occidentalis]}	{NA}	{cput:CONPUDRAFT_66962; }	{NA}	{NA}	{NA}	{NA}	{NA}	{NA}	{NA}	{NA}	{NA}
A00585	{Contig10:1279664:1281317:-}	{KAG1896502.1; hypothetical protein F5891DRAFT_1175230 [Suillus fuscotomentosus]}	{NA}	{NA}	{NA}	{NA}	{NA}	{NA}	{NA}	{NA}	{NA}	{NA}	{NA}
A00586	{Contig10:1287735:1288591:-}	{KAG1798739.1; hypothetical protein EV424DRAFT_1352496 [Suillus variegatus]}	{NA}	{NA}	{NA}	{NA}	{GO:0005840; ribosome; cellular_component GO:0006414; translational elongation; biological_process GO:0003735; structural constituent of ribosome; molecular_function GO:0005622; intracellular; cellular_component}	{NA}	{NA}	{NA}	{NA}	{NA}	{PF00428:60s Acidic ribosomal protein}
A00587	{Contig10:1291527:1292366:-}	{KAG2143564.1; hypothetical protein EDB93DRAFT_1251979 [Suillus bovinus]}	{NA}	{NA}	{NA}	{NA}	{NA}	{NA}	{NA}	{NA}	{NA}	{NA}	{NA}
A00588	{Contig10:1294214:1295543:+}	{KAG2741695.1; P-loop containing nucleoside triphosphate hydrolase protein [Suillus brevipes Sb2]}	{NA}	{sla:SERLADRAFT_440218; }	{NA}	{NA}	{GO:0003677; DNA binding; molecular_function GO:0003676; nucleic acid binding; molecular_function GO:0016787; hydrolase activity; molecular_function GO:0005524; ATP binding; molecular_function GO:0009291; unidirectional conjugation; biological_process GO:0016020; membrane; cellular_component GO:0008026; ATP-dependent helicase activity; molecular_function}	{NA}	{NA}	{NA}	{NA}	{NA}	{PF00270:DEAD/DEAH box helicase PF02534:Type IV secretory system Conjugative DNA transfer PF04851:Type III restriction enzyme, res subunit}
A00589	{Contig10:1296461:1303117:+}	{KAF7371469.1; Zinc finger BED domain-containing protein RICESLEEPER 2 [Mycena venus]}	{NA}	{NA}	{NA}	{NA}	{GO:0046983; protein dimerization activity; molecular_function}	{NA}	{NA}	{NA}	{NA}	{NA}	{PF05699:hAT family C-terminal dimerisation region}
A00590	{Contig10:1305279:1305993:-}	{KAG2150349.1; Glucanosyltransferase [Suillus bovinus]}	{NA}	{NA}	{NA}	{NA}	{GO:0005975; carbohydrate metabolic process; biological_process GO:0004553; hydrolase activity, hydrolyzing O-glycosyl compounds; molecular_function}	{NA}	{NA}	{NA}	{NA}	{NA}	{PF00150:Cellulase (glycosyl hydrolase family 5)}
A00591	{Contig10:1307860:1311576:+}	{KAG2150355.1; hypothetical protein EDB93DRAFT_1205209 [Suillus bovinus]}	{NA}	{gtr:GLOTRDRAFT_45377; K12236 NFX1 transcriptional repressor NF-X1 -- Human Diseases; Infectious diseases: Viral; Human papillomavirus infection [PATH:ko05165]}	{NA}	{NA}	{GO:0003676; nucleic acid binding; molecular_function GO:0008270; zinc ion binding; molecular_function GO:0003700; sequence-specific DNA binding transcription factor activity; molecular_function GO:0005634; nucleus; cellular_component GO:0006355; regulation of transcription, DNA-dependent; biological_process}	{NA}	{NA}	{NA}	{NA}	{NA}	{PF01424:R3H domain PF01422:NF-X1 type zinc finger}
A00592	{Contig10:132622:138602:-}	{KAG2127583.1; hypothetical protein EDB93DRAFT_1256978 [Suillus bovinus]}	{NA}	{NA}	{NA}	{NA}	{NA}	{NA}	{NA}	{NA}	{NA}	{NA}	{NA}
A00593	{Contig10:1312557:1318981:+}	{KAG1843468.1; SNF2 family N-terminal domain-containing protein [Suillus subalutaceus]}	{P31244; DNA repair protein RAD16 }	{sla:SERLADRAFT_459982; K15083 RAD16 DNA repair protein RAD16 -- }	{YBR114w; KOG1002 Nucleotide excision repair protein RAD16 L Replication, recombination and repair ;}	{NA}	{GO:0003677; DNA binding; molecular_function GO:0004842; ubiquitin-protein ligase activity; molecular_function GO:0008270; zinc ion binding; molecular_function GO:0005515; protein binding; molecular_function GO:0005524; ATP binding; molecular_function GO:0003676; nucleic acid binding; molecular_function GO:0016787; hydrolase activity; molecular_function GO:0005680; anaphase-promoting complex; cel…	{NA}	{NA}	{NA}	{NA}	{NA}	{PF13639:Ring finger domain PF12678:RING-H2 zinc finger domain PF04851:Type III restriction enzyme, res subunit PF00176:SNF2-related domain PF00271:Helicase conserved C-terminal domain PF12861:Anaphase-promoting complex subunit 11 RING-H2 finger PF00097:Zinc finger, C3HC4 type (RING finger)}
A00594	{Contig10:1319689:1320667:-}	{KAG1753267.1; translation protein SH3-like domain-containing protein [Suillus spraguei|Suillus lakei|Suillus discolor|Suillus brevipes Sb2|Suillus occidentalis|Suillus plorans|Suillus tomentosus|Suillus luteus UH-Slu-Lm8-n1|Suillus fuscotomentosus|Suillus hirtellus]}	{Q75AP7; 60S ribosomal protein L2 }	{mrr:Moror_17450; K02938 RP-L8e, RPL8 large subunit ribosomal protein L8e -- Genetic Information Processing; Translation; Ribosome [PATH:ko03010]}	{SPBC2F12.07c; KOG2309 60s ribosomal protein L2/L8 J Translation, ribosomal structure and biogenesis ;}	{NA}	{GO:0006412; translation; biological_process GO:0005840; ribosome; cellular_component GO:0003735; structural constituent of ribosome; molecular_function GO:0005622; intracellular; cellular_component}	{PHI:1584; I1RS24 GzOB024 5518 Fusarium graminearum Fusarium Ear Blight Triticum (related: wheat) transcription factor gene deletion unaffected pathogenicity}	{NA}	{NA}	{NA}	{NA}	{PF03947:Ribosomal Proteins L2, C-terminal domain PF00181:Ribosomal Proteins L2, RNA binding domain}
A00595	{Contig10:1324713:1325351:+}	{KAG2745646.1; hypothetical protein P692DRAFT_201719797, partial [Suillus brevipes Sb2]}	{NA}	{lbc:LACBIDRAFT_321330; }	{NA}	{NA}	{GO:0003677; DNA binding; molecular_function GO:0006351; transcription, DNA-dependent; biological_process GO:0003899; DNA-directed RNA polymerase activity; molecular_function}	{NA}	{NA}	{NA}	{NA}	{NA}	{PF05158:RNA polymerase Rpc34 subunit}
A00596	{Contig10:1336462:1338018:-}	{KAG1851420.1; hypothetical protein DFJ58DRAFT_886304 [Suillus subalutaceus]}	{NA}	{NA}	{NA}	{NA}	{GO:0046983; protein dimerization activity; molecular_function}	{NA}	{NA}	{NA}	{NA}	{NA}	{PF05699:hAT family C-terminal dimerisation region}
A00597	{Contig10:1344245:1344517:-}	{KAG2074677.1; hypothetical protein BDR04DRAFT_1150964 [Suillus decipiens]}	{NA}	{NA}	{NA}	{NA}	{NA}	{NA}	{NA}	{NA}	{NA}	{NA}	{NA}
A00598	{Contig10:1345353:1350205:+}	{XP_027619707.1; Transposon Tf2-6 polyprotein [Sparassis crispa]}	{NA}	{mrr:Moror_2377; }	{NA}	{NA}	{GO:0015074; DNA integration; biological_process GO:0003723; RNA binding; molecular_function GO:0003676; nucleic acid binding; molecular_function GO:0008270; zinc ion binding; molecular_function GO:0006278; RNA-dependent DNA replication; biological_process GO:0005089; Rho guanyl-nucleotide exchange factor activity; molecular_function GO:0003964; RNA-directed DNA polymerase activity; molecular_fun…	{NA}	{NA}	{NA}	{NA}	{NA}	{PF00098:Zinc knuckle PF00621:RhoGEF domain PF00665:Integrase core domain PF00078:Reverse transcriptase (RNA-dependent DNA polymerase)}
A00599	{Contig10:1350260:1351342:+}	{KAG1829941.1; hypothetical protein EV424DRAFT_1535331 [Suillus variegatus]}	{NA}	{NA}	{NA}	{NA}	{GO:0008270; zinc ion binding; molecular_function GO:0003676; nucleic acid binding; molecular_function}	{NA}	{NA}	{NA}	{NA}	{NA}	{PF00098:Zinc knuckle}
A00600	{Contig10:1355031:1355511:+}	{KAG1907212.1; hypothetical protein F5891DRAFT_1181507 [Suillus fuscotomentosus]}	{NA}	{NA}	{NA}	{NA}	{NA}	{NA}	{NA}	{NA}	{NA}	{NA}	{NA}
A00601	{Contig10:1356914:1357135:-}	{KAG2139097.1; hypothetical protein EDB93DRAFT_1253162 [Suillus bovinus]}	{NA}	{NA}	{NA}	{NA}	{NA}	{NA}	{NA}	{NA}	{NA}	{NA}	{NA}
A00602	{Contig10:1358702:1361583:+}	{KAG2130999.1; hypothetical protein EDB93DRAFT_1255658 [Suillus bovinus]}	{NA}	{NA}	{NA}	{NA}	{NA}	{NA}	{NA}	{NA}	{NA}	{NA}	{NA}
A00603	{Contig10:138784:141802:+}	{KAG2127579.1; hypothetical protein EDB93DRAFT_1256976 [Suillus bovinus]}	{NA}	{NA}	{NA}	{NA}	{NA}	{NA}	{NA}	{NA}	{NA}	{NA}	{NA}
A00604	{Contig10:1361986:1363159:+}	{KAG2130998.1; hypothetical protein EDB93DRAFT_947176 [Suillus bovinus]}	{NA}	{cput:CONPUDRAFT_136717; }	{NA}	{NA}	{GO:0005515; protein binding; molecular_function}	{NA}	{NA}	{NA}	{NA}	{NA}	{PF00018:SH3 domain}
A00605	{Contig10:1363558:1365117:-}	{KAG2130997.1; hypothetical protein EDB93DRAFT_1094551 [Suillus bovinus]}	{NA}	{cput:CONPUDRAFT_103021; }	{NA}	{NA}	{GO:0000079; regulation of cyclin-dependent protein kinase activity; biological_process GO:0019901; protein kinase binding; molecular_function}	{NA}	{NA}	{NA}	{NA}	{NA}	{PF08613:Cyclin}
A00606	{Contig10:1366062:1366885:+}	{KAG2130996.1; UAA transporter [Suillus bovinus]}	{NA}	{pco:PHACADRAFT_157946; K15278 SLC35B4, YEA4 solute carrier family 35 (UDP-xylose/UDP-N-acetylglucosamine transporter), member B4 -- }	{NA}	{NA}	{GO:0055085; transmembrane transport; biological_process GO:0016020; membrane; cellular_component GO:0016021; integral to membrane; cellular_component}	{NA}	{NA}	{NA}	{NA}	{NA}	{PF00892:EamA-like transporter family PF00335:Tetraspanin family PF08449:UAA transporter family}
A00607	{Contig10:1367127:1373297:-}	{KAG2130994.1; armadillo-type protein [Suillus bovinus]}	{NA}	{sla:SERLADRAFT_413643; K12882 NCBP1, CBP80 nuclear cap-binding protein subunit 1 -- Genetic Information Processing; Translation; RNA transport [PATH:ko03013] Genetic Information Processing; Translation; mRNA surveillance pathway [PATH:ko03015] Genetic Information Processing; Transcription; Spliceosome [PATH:ko03040]}	{NA}	{NA}	{GO:0016070; RNA metabolic process; biological_process}	{NA}	{NA}	{NA}	{NA}	{NA}	{PF09088:MIF4G like PF09090:MIF4G like}
A00608	{Contig10:1373780:1376425:+}	{KAG2114738.1; hypothetical protein F5147DRAFT_431308 [Suillus discolor]}	{NA}	{cput:CONPUDRAFT_81713; }	{NA}	{NA}	{NA}	{NA}	{NA}	{NA}	{NA}	{NA}	{NA}
A00609	{Contig10:1376475:1377122:-}	{KAG2130992.1; hypothetical protein EDB93DRAFT_947067 [Suillus bovinus]}	{NA}	{gtr:GLOTRDRAFT_34401; K02520 infC, MTIF3 translation initiation factor IF-3 -- }	{NA}	{NA}	{GO:0006413; translational initiation; biological_process GO:0003743; translation initiation factor activity; molecular_function}	{NA}	{NA}	{NA}	{NA}	{NA}	{PF05198:Translation initiation factor IF-3, N-terminal domain PF00707:Translation initiation factor IF-3, C-terminal domain}
A00610	{Contig10:1379912:1381208:-}	{KAG2130991.1; mitochondrial carrier domain-containing protein [Suillus bovinus]}	{NA}	{sla:SERLADRAFT_459976; K15115 SLC25A32, MFT solute carrier family 25 (mitochondrial folate transporter), member 32 -- }	{NA}	{NA}	{NA}	{NA}	{NA}	{NA}	{NA}	{NA}	{NA}
A00611	{Contig10:1381675:1382583:+}	{KAG2130990.1; velvet factor [Suillus bovinus]}	{B2CQK0; Spore development regulator RYP2 }	{abp:AGABI1DRAFT144390; }	{NA}	{NA}	{NA}	{PHI:1107__PHI:1108; NA}	{NA}	{NA}	{NA}	{NA}	{NA}
A00612	{Contig10:1383827:1384641:+}	{KAG2130989.1; hypothetical protein EDB93DRAFT_1255647 [Suillus bovinus]}	{NA}	{sla:SERLADRAFT_413646; }	{NA}	{NA}	{NA}	{NA}	{NA}	{NA}	{YES}	{NA}	{NA}
A00613	{Contig10:1386405:1387369:+}	{KAG2130988.1; hypothetical protein EDB93DRAFT_1108212 [Suillus bovinus]}	{NA}	{NA}	{NA}	{NA}	{NA}	{NA}	{NA}	{NA}	{NA}	{NA}	{NA}
A00614	{Contig10:143197:149747:-}	{KAG2128356.1; hypothetical protein EDB93DRAFT_1256700 [Suillus bovinus]}	{NA}	{NA}	{NA}	{NA}	{NA}	{NA}	{NA}	{NA}	{NA}	{NA}	{NA}
A00615	{Contig10:1387697:1388162:+}	{NA}	{NA}	{aje:HCAG_04406; }	{NA}	{NA}	{NA}	{NA}	{NA}	{NA}	{NA}	{NA}	{NA}
A00616	{Contig10:1388904:1391036:-}	{KAG2130987.1; acyl-CoA dehydrogenase/oxidase [Suillus bovinus]}	{NA}	{sla:SERLADRAFT_354576; }	{NA}	{NA}	{GO:0050660; flavin adenine dinucleotide binding; molecular_function GO:0020037; heme binding; molecular_function GO:0055114; oxidation-reduction process; biological_process GO:0003995; acyl-CoA dehydrogenase activity; molecular_function GO:0016627; oxidoreductase activity, acting on the CH-CH group of donors; molecular_function GO:0016491; oxidoreductase activity; molecular_function GO:0008152; …	{NA}	{NA}	{NA}	{NA}	{NA}	{PF08028:Acyl-CoA dehydrogenase, C-terminal domain PF02771:Acyl-CoA dehydrogenase, N-terminal domain PF02770:Acyl-CoA dehydrogenase, middle domain PF00441:Acyl-CoA dehydrogenase, C-terminal domain PF00173:Cytochrome b5-like Heme/Steroid binding domain}
A00617	{Contig10:1392405:1393969:+}	{KAG2130986.1; cyclin-domain-containing protein [Suillus bovinus]}	{P40186; PHO85 cyclin-7 }	{cput:CONPUDRAFT_81716; }	{YIL050w; KOG1674 Cyclin R General function prediction only ;}	{NA}	{GO:0000079; regulation of cyclin-dependent protein kinase activity; biological_process GO:0019901; protein kinase binding; molecular_function}	{NA}	{NA}	{NA}	{NA}	{NA}	{PF08613:Cyclin}
A00618	{Contig10:1395136:1397235:-}	{KAG2130985.1; glucosidase II beta subunit-like-domain-containing protein [Suillus bovinus]}	{NA}	{sla:SERLADRAFT_446333; K08288 PRKCSH protein kinase C substrate 80K-H -- Genetic Information Processing; Folding, sorting and degradation; Protein processing in endoplasmic reticulum [PATH:ko04141]}	{NA}	{NA}	{GO:0005515; protein binding; molecular_function}	{NA}	{NA}	{NA}	{YES}	{NA}	{PF00057:Low-density lipoprotein receptor domain class A}
A00619	{Contig10:1397291:1402956:+}	{KAG2130982.1; hypothetical protein EDB93DRAFT_946254 [Suillus bovinus]}	{Q6DCD1; FGGY carbohydrate kinase domain-containing protein }	{sla:SERLADRAFT_459949; }	{At4g30310; KOG2517 Ribulose kinase and related carbohydrate kinases G Carbohydrate transport and metabolism ;}	{NA}	{GO:0006355; regulation of transcription, DNA-dependent; biological_process GO:0016773; phosphotransferase activity, alcohol group as acceptor; molecular_function GO:0005622; intracellular; cellular_component GO:0005975; carbohydrate metabolic process; biological_process GO:0003700; sequence-specific DNA binding transcription factor activity; molecular_function}	{NA}	{NA}	{NA}	{NA}	{NA}	{PF02782:FGGY family of carbohydrate kinases, C-terminal domain PF01047:MarR family PF00370:FGGY family of carbohydrate kinases, N-terminal domain}
A00620	{Contig10:1403191:1404868:-}	{KAG2130981.1; hypothetical protein EDB93DRAFT_946270 [Suillus bovinus]}	{NA}	{NA}	{NA}	{NA}	{NA}	{NA}	{NA}	{NA}	{NA}	{NA}	{NA}
A00621	{Contig10:1409802:1410337:+}	{KIJ10407.1; hypothetical protein PAXINDRAFT_48709, partial [Paxillus involutus ATCC 200175]}	{NA}	{mrr:Moror_12940; }	{At5g28950; KOG4585 Predicted transposase L Replication, recombination and repair ;}	{NA}	{NA}	{NA}	{NA}	{NA}	{NA}	{NA}	{NA}
A00622	{Contig10:1411104:1412334:-}	{KAG2130979.1; hypothetical protein EDB93DRAFT_1255635 [Suillus bovinus]}	{NA}	{NA}	{NA}	{NA}	{NA}	{NA}	{NA}	{NA}	{NA}	{NA}	{NA}
A00623	{Contig10:1421179:1434648:+}	{KAG2157251.1; hypothetical protein DEU56DRAFT_921349, partial [Suillus clintonianus]}	{NA}	{NA}	{NA}	{NA}	{NA}	{NA}	{NA}	{NA}	{NA}	{NA}	{NA}
A00624	{Contig10:1435439:1437786:-}	{KAG2150335.1; Alpha/Beta hydrolase protein [Suillus bovinus]}	{NA}	{sla:SERLADRAFT_458341; }	{NA}	{NA}	{GO:0008152; NA GO:0016787; hydrolase activity; molecular_function}	{NA}	{NA}	{NA}	{YES}	{NA}	{PF07859:alpha/beta hydrolase fold}
A00625	{Contig10:150682:151512:+}	{KAG2128355.1; hypothetical protein EDB93DRAFT_1096042 [Suillus bovinus]}	{NA}	{mpr:MPER_04494; }	{NA}	{NA}	{GO:0006351; transcription, DNA-dependent; biological_process GO:0003677; DNA binding; molecular_function GO:0005634; nucleus; cellular_component GO:0008270; zinc ion binding; molecular_function}	{NA}	{NA}	{NA}	{NA}	{NA}	{PF04082:Fungal specific transcription factor domain }
A00626	{Contig10:1440571:1441547:-}	{KAG2130974.1; Cwf15 Cwc15 cell cycle control protein [Suillus bovinus]}	{Q5B020; Pre-mRNA-splicing factor cwc15 }	{tvs:TRAVEDRAFT_173525; K12863 CWC15 protein CWC15 -- Genetic Information Processing; Transcription; Spliceosome [PATH:ko03040]}	{SPBC337.06c; KOG3228 Uncharacterized conserved protein S Function unknown ;}	{NA}	{GO:0005219; ryanodine-sensitive calcium-release channel activity; molecular_function GO:0006270; DNA-dependent DNA replication initiation; biological_process GO:0046872; metal ion binding; molecular_function GO:0016021; integral to membrane; cellular_component GO:0006874; cellular calcium ion homeostasis; biological_process GO:0005681; spliceosomal complex; cellular_component GO:0007050; cell cy…	{NA}	{NA}	{NA}	{NA}	{NA}	{PF02862:DDHD domain PF02724:CDC45-like protein PF04147:Nop14-like family PF04636:PA26 p53-induced protein (sestrin) PF04889:Cwf15/Cwc15 cell cycle control protein PF06459:Ryanodine Receptor TM 4-6}
A00627	{Contig10:1442716:1444971:+}	{KAG2130973.1; hypothetical protein EDB93DRAFT_1255627 [Suillus bovinus]}	{NA}	{NA}	{NA}	{NA}	{NA}	{NA}	{NA}	{NA}	{NA}	{NA}	{NA}
A00628	{Contig10:1445349:1447150:+}	{KIK38237.1; hypothetical protein CY34DRAFT_809581 [Suillus luteus UH-Slu-Lm8-n1]}	{NA}	{NA}	{NA}	{NA}	{GO:0006511; ubiquitin-dependent protein catabolic process; biological_process GO:0005515; protein binding; molecular_function GO:0019773; proteasome core complex, alpha-subunit complex; cellular_component GO:0004175; endopeptidase activity; molecular_function}	{NA}	{NA}	{NA}	{NA}	{NA}	{PF10584:Proteasome subunit A N-terminal signature PF00400:WD domain, G-beta repeat}
A00629	{Contig10:1447773:1449470:-}	{KAG2130972.1; WD40-repeat-containing domain protein [Suillus bovinus]}	{NA}	{sla:SERLADRAFT_434931; K14961 RBBP5, SWD1, CPS50 COMPASS component SWD1 -- Human Diseases; Endocrine and metabolic diseases; Cushing syndrome [PATH:ko04934]}	{NA}	{NA}	{GO:0005515; protein binding; molecular_function}	{NA}	{NA}	{NA}	{NA}	{NA}	{PF00400:WD domain, G-beta repeat}
A00630	{Contig10:1449722:1451527:+}	{KAG2130971.1; hypothetical protein EDB93DRAFT_945759 [Suillus bovinus]}	{NA}	{sla:SERLADRAFT_413675; }	{NA}	{NA}	{GO:0043231; intracellular membrane-bounded organelle; cellular_component GO:0051537; 2 iron, 2 sulfur cluster binding; molecular_function}	{NA}	{NA}	{NA}	{NA}	{NA}	{PF10660:Iron-containing outer mitochondrial membrane protein N-terminus }
A00631	{Contig10:1451979:1452724:-}	{KAG2114762.1; hypothetical protein F5147DRAFT_431787 [Suillus discolor]}	{NA}	{mrr:Moror_1561; }	{NA}	{NA}	{GO:0006260; DNA replication; biological_process GO:0003677; DNA binding; molecular_function GO:0005664; nuclear origin of replication recognition complex; cellular_component}	{NA}	{NA}	{NA}	{NA}	{NA}	{PF05460:Origin recognition complex subunit 6 (ORC6)}
A00632	{Contig10:1454097:1454435:-}	{KAG2130969.1; hypothetical protein EDB93DRAFT_1108195 [Suillus bovinus]}	{NA}	{NA}	{NA}	{NA}	{NA}	{NA}	{NA}	{NA}	{NA}	{NA}	{NA}
A00633	{Contig10:1457025:1458272:+}	{KAG2029447.1; hypothetical protein BDR03DRAFT_1018374 [Suillus americanus]}	{NA}	{abv:AGABI2DRAFT74845; }	{NA}	{NA}	{GO:0008270; zinc ion binding; molecular_function GO:0003676; nucleic acid binding; molecular_function}	{NA}	{NA}	{NA}	{NA}	{NA}	{PF00098:Zinc knuckle}
A00634	{Contig10:1461757:1461996:+}	{KAG2758119.1; hypothetical protein P692DRAFT_20710956, partial [Suillus brevipes Sb2]}	{NA}	{NA}	{NA}	{NA}	{NA}	{NA}	{NA}	{NA}	{NA}	{NA}	{NA}
A00635	{Contig10:1476689:1478652:-}	{KAG2127711.1; tRNA modification GTPase TrmE [Suillus bovinus]}	{Q501Z5; tRNA modification GTPase GTPBP3, mitochondrial }	{cput:CONPUDRAFT_164820; K03650 mnmE, trmE, MSS1 tRNA modification GTPase 3.6.-.- }	{NA}	{NA}	{GO:0005525; GTP binding; molecular_function}	{NA}	{NA}	{NA}	{NA}	{NA}	{PF01926:50S ribosome-binding GTPase}
A00636	{Contig10:153967:155173:+}	{KAG2128351.1; hypothetical protein EDB93DRAFT_1268446 [Suillus bovinus]}	{NA}	{NA}	{NA}	{NA}	{GO:0006886; intracellular protein transport; biological_process GO:0004674; protein serine/threonine kinase activity; molecular_function GO:0006468; protein phosphorylation; biological_process GO:0007165; signal transduction; biological_process GO:0005096; GTPase activator activity; molecular_function GO:0008536; Ran GTPase binding; molecular_function}	{NA}	{NA}	{NA}	{NA}	{NA}	{PF03810:Importin-beta N-terminal domain PF09036:Bcr-Abl oncoprotein oligomerisation domain}
A00637	{Contig10:1479036:1479861:+}	{KAG1780455.1; hypothetical protein EV702DRAFT_1043251 [Suillus placidus|Suillus bovinus]}	{P0CM55; Calcineurin subunit B }	{cput:CONPUDRAFT_103047; K06268 PPP3R, CNB serine/threonine-protein phosphatase 2B regulatory subunit -- Environmental Information Processing; Signal transduction; MAPK signaling pathway [PATH:ko04010] Environmental Information Processing; Signal transduction; Calcium signaling pathway [PATH:ko04020] Environmental Information Processing; Signal transduction; cGMP-PKG signaling pathway [PATH:ko040…	{SPCC830.06; KOG0034 Ca2+/calmodulin-dependent protein phosphatase (calcineurin subunit B), EF-Hand superfamily protein T Signal transduction mechanisms ;}	{NA}	{GO:0007165; signal transduction; biological_process GO:0005509; calcium ion binding; molecular_function GO:0005975; carbohydrate metabolic process; biological_process GO:0004553; hydrolase activity, hydrolyzing O-glycosyl compounds; molecular_function GO:0005578; proteinaceous extracellular matrix; cellular_component}	{PHI:474; P0CM54 CNB1 5207 Cryptococcus neoformans Cryptococcosis Mus musculus (related: house mouse) Calcineurin B regulatory subunit gene disruption; gene complementation loss of pathogenicity}	{CANB_CRYNB; CNB1 EAL20994.1 175 Cryptococcus neoformans 283643 FUNCTION: Regulatory subunit of calcineurin, a calcium-dependent, calmodulin stimulated protein phosphatase. Confers calcium sensitivity. Plays a central role in virulence and antifungal drug action (By similarity).; SUBUNIT: Composed of a catalytic subunit (A) and a regulatory subunit (B) (By similarity).; MISCELLANEOUS: This protei…	{NA}	{NA}	{NA}	{PF00036:EF hand PF13405:EF-hand domain PF13202:EF hand PF13499:EF-hand domain pair PF00404:Dockerin type I domain PF10591:Secreted protein acidic and rich in cysteine Ca binding region}
A00638	{Contig10:1481208:1484975:-}	{KAG2127714.1; WD40-repeat-containing domain protein [Suillus bovinus]}	{NA}	{sla:SERLADRAFT_460090; }	{NA}	{NA}	{GO:0005515; protein binding; molecular_function}	{NA}	{NA}	{NA}	{NA}	{NA}	{PF00400:WD domain, G-beta repeat}
A00639	{Contig10:1485320:1485906:+}	{KAG2127715.1; hypothetical protein EDB93DRAFT_1243644 [Suillus bovinus]}	{NA}	{sla:SERLADRAFT_460093; }	{NA}	{NA}	{NA}	{NA}	{NA}	{NA}	{NA}	{NA}	{NA}
A00640	{Contig10:1488278:1490217:+}	{KAG2127717.1; MBOAT, membrane-bound O-acyltransferase family-domain-containing protein [Suillus bovinus]}	{NA}	{sla:SERLADRAFT_460099; K13519 LPT1, ALE1 lysophospholipid acyltransferase 2.3.1.51 2.3.1.23 2.3.1.- Metabolism; Lipid metabolism; Glycerolipid metabolism [PATH:ko00561] Metabolism; Lipid metabolism; Glycerophospholipid metabolism [PATH:ko00564] Metabolism; Lipid metabolism; Ether lipid metabolism [PATH:ko00565] Metabolism; Global and overview maps; Metabolic pathways [PATH:ko01100] Metabolism; G…	{NA}	{NA}	{NA}	{NA}	{NA}	{NA}	{NA}	{NA}	{NA}
A00641	{Contig10:1490504:1491324:-}	{KAG2127718.1; 60S ribosomal protein L18 [Suillus bovinus]}	{Q8TFH1; 60S ribosomal protein L18-B }	{dsq:DICSQDRAFT_103584; K02883 RP-L18e, RPL18 large subunit ribosomal protein L18e -- Genetic Information Processing; Translation; Ribosome [PATH:ko03010]}	{SPBC11C11.07; KOG1714 60s ribosomal protein L18 J Translation, ribosomal structure and biogenesis ;}	{NA}	{NA}	{NA}	{NA}	{NA}	{NA}	{NA}	{NA}
A00642	{Contig10:1491388:1497834:+}	{KAG1790720.1; hypothetical protein HD556DRAFT_690397 [Suillus plorans]}	{NA}	{sla:SERLADRAFT_434943; K12897 TRA2 transformer-2 protein -- Genetic Information Processing; Transcription; Spliceosome [PATH:ko03040]}	{NA}	{NA}	{GO:0003676; nucleic acid binding; molecular_function}	{NA}	{NA}	{NA}	{NA}	{NA}	{PF00076:RNA recognition motif. (a.k.a. RRM, RBD, or RNP domain)}
A00643	{Contig10:1500200:1503973:-}	{KAG1858288.1; hypothetical protein C8R48DRAFT_267769 [Suillus tomentosus]}	{NA}	{cput:CONPUDRAFT_123377; }	{NA}	{NA}	{GO:0016491; oxidoreductase activity; molecular_function GO:0055114; oxidation-reduction process; biological_process}	{NA}	{NA}	{NA}	{NA}	{NA}	{PF08240:Alcohol dehydrogenase GroES-like domain}
A00644	{Contig10:1504169:1506355:-}	{KAG2127723.1; P-loop containing nucleoside triphosphate hydrolase protein [Suillus bovinus]}	{NA}	{cput:CONPUDRAFT_123380; K14538 NUG1, GNL3 nuclear GTP-binding protein -- Genetic Information Processing; Translation; Ribosome biogenesis in eukaryotes [PATH:ko03008]}	{NA}	{NA}	{GO:0015684; ferrous iron transport; biological_process GO:0015093; ferrous iron transmembrane transporter activity; molecular_function GO:0016021; integral to membrane; cellular_component GO:0006355; regulation of transcription, DNA-dependent; biological_process GO:0000160; two-component signal transduction system (phosphorelay); biological_process GO:0005525; GTP binding; molecular_function GO:…	{NA}	{NA}	{NA}	{NA}	{NA}	{PF00009:Elongation factor Tu GTP binding domain PF04548:AIG1 family PF02421:Ferrous iron transport protein B PF00350:Dynamin family PF03193:RsgA GTPase PF01926:50S ribosome-binding GTPase PF00486:Transcriptional regulatory protein, C terminal}
A00645	{Contig10:1506640:1508556:+}	{KAG2127724.1; hypothetical protein EDB93DRAFT_1186129 [Suillus bovinus]}	{NA}	{NA}	{NA}	{NA}	{NA}	{NA}	{NA}	{NA}	{NA}	{NA}	{NA}
A00646	{Contig10:1509270:1511529:-}	{KAG2127725.1; serine carboxypeptidase S28-domain-containing protein [Suillus bovinus]}	{NA}	{sla:SERLADRAFT_476841; }	{NA}	{NA}	{GO:0008236; serine-type peptidase activity; molecular_function GO:0006508; proteolysis; biological_process}	{NA}	{NA}	{NA}	{YES}	{NA}	{PF00326:Prolyl oligopeptidase family PF05577:Serine carboxypeptidase S28}
A00647	{Contig10:155826:156313:-}	{KAG2128352.1; hypothetical protein EDB93DRAFT_1268447 [Suillus bovinus]}	{NA}	{NA}	{NA}	{NA}	{GO:0005515; protein binding; molecular_function}	{NA}	{NA}	{NA}	{NA}	{NA}	{PF00515:Tetratricopeptide repeat}
A00648	{Contig10:1512310:1514106:+}	{KAG2127726.1; hypothetical protein EDB93DRAFT_198165 [Suillus bovinus]}	{NA}	{NA}	{NA}	{NA}	{NA}	{NA}	{NA}	{NA}	{NA}	{NA}	{NA}
A00649	{Contig10:1514337:1515692:-}	{KAG2127727.1; DNA-directed RNA polymerase [Suillus bovinus]}	{P52432; DNA-directed RNA polymerases I and III subunit RPAC1 }	{sla:SERLADRAFT_447454; K03027 RPC40, POLR1C DNA-directed RNA polymerases I and III subunit RPAC1 -- Metabolism; Nucleotide metabolism; Purine metabolism [PATH:ko00230] Metabolism; Nucleotide metabolism; Pyrimidine metabolism [PATH:ko00240] Metabolism; Global and overview maps; Metabolic pathways [PATH:ko01100] Genetic Information Processing; Transcription; RNA polymerase [PATH:ko03020] Organisma…	{SPBC1289.07c; KOG1521 RNA polymerase I and III, subunit RPA40/RPC40 K Transcription ;}	{NA}	{GO:0003899; DNA-directed RNA polymerase activity; molecular_function GO:0006351; transcription, DNA-dependent; biological_process GO:0005515; protein binding; molecular_function GO:0046983; protein dimerization activity; molecular_function}	{NA}	{NA}	{NA}	{NA}	{NA}	{PF01193:RNA polymerase Rpb3/Rpb11 dimerisation domain PF00041:Fibronectin type III domain PF01000:RNA polymerase Rpb3/RpoA insert domain}
A00650	{Contig10:1515888:1520189:+}	{KIK42820.1; hypothetical protein CY34DRAFT_106698 [Suillus luteus UH-Slu-Lm8-n1]}	{NA}	{sla:SERLADRAFT_460139; }	{NA}	{NA}	{GO:0003676; nucleic acid binding; molecular_function GO:0046872; metal ion binding; molecular_function}	{NA}	{NA}	{NA}	{NA}	{NA}	{PF00096:Zinc finger, C2H2 type PF00076:RNA recognition motif. (a.k.a. RRM, RBD, or RNP domain)}
A00651	{Contig10:1520577:1524777:+}	{KAG2127730.1; hypothetical protein EDB93DRAFT_198425 [Suillus bovinus]}	{NA}	{cput:CONPUDRAFT_103616; K11233 SSK1 osomolarity two-component system, response regulator SSK1 -- Environmental Information Processing; Signal transduction; Two-component system [PATH:ko02020] Environmental Information Processing; Signal transduction; MAPK signaling pathway - yeast [PATH:ko04011] Cellular Processes; Transport and catabolism; Mitophagy - yeast [PATH:ko04139]}	{NA}	{NA}	{GO:0016491; oxidoreductase activity; molecular_function GO:0000156; two-component response regulator activity; molecular_function GO:0006355; regulation of transcription, DNA-dependent; biological_process GO:0000160; two-component signal transduction system (phosphorelay); biological_process GO:0055114; oxidation-reduction process; biological_process}	{NA}	{NA}	{NA}	{NA}	{NA}	{PF00148:Nitrogenase component 1 type Oxidoreductase PF00072:Response regulator receiver domain}
A00652	{Contig10:1525490:1528984:+}	{KAG2127731.1; hypothetical protein EDB93DRAFT_1096342 [Suillus bovinus]}	{NA}	{sla:SERLADRAFT_446408; K15601 KDM3 lysine-specific demethylase 3 1.14.11.- Organismal Systems; Environmental adaptation; Thermogenesis [PATH:ko04714]}	{NA}	{NA}	{GO:0005515; protein binding; molecular_function GO:0035556; intracellular signal transduction; biological_process GO:0046872; metal ion binding; molecular_function}	{NA}	{NA}	{NA}	{NA}	{NA}	{PF02373:JmjC domain, hydroxylase PF00130:Phorbol esters/diacylglycerol binding domain (C1 domain) PF01363:FYVE zinc finger}
A00653	{Contig10:1532331:1534228:-}	{KAG2159081.1; hypothetical protein EDB93DRAFT_1325148 [Suillus bovinus]}	{NA}	{NA}	{NA}	{NA}	{NA}	{NA}	{NA}	{NA}	{NA}	{NA}	{NA}
A00654	{Contig10:1539812:1541524:-}	{KAG2159080.1; hypothetical protein EDB93DRAFT_1245636 [Suillus bovinus]}	{NA}	{NA}	{NA}	{NA}	{GO:0008610; lipid biosynthetic process; biological_process GO:0008168; methyltransferase activity; molecular_function}	{NA}	{NA}	{NA}	{NA}	{NA}	{PF04989:Cephalosporin hydroxylase}
A00655	{Contig10:1542024:1543096:-}	{KAG2132148.1; hypothetical protein EDB93DRAFT_1255334 [Suillus bovinus]}	{NA}	{NA}	{NA}	{NA}	{NA}	{NA}	{NA}	{NA}	{NA}	{NA}	{NA}
A00656	{Contig10:1545405:1548818:-}	{KAG1908789.1; hypothetical protein F5891DRAFT_974104 [Suillus fuscotomentosus]}	{NA}	{NA}	{NA}	{NA}	{NA}	{NA}	{NA}	{NA}	{NA}	{NA}	{NA}
A00657	{Contig10:1549379:1550111:-}	{KAG2134929.1; hypothetical protein EDB93DRAFT_1107253 [Suillus bovinus]}	{NA}	{NA}	{NA}	{NA}	{GO:0006357; regulation of transcription from RNA polymerase II promoter; biological_process GO:0001104; RNA polymerase II transcription cofactor activity; molecular_function GO:0016592; mediator complex; cellular_component}	{NA}	{NA}	{NA}	{NA}	{NA}	{PF11593:Mediator complex subunit 3 fungal}
A00658	{Contig10:156734:160804:-}	{KAG2128353.1; hypothetical protein EDB93DRAFT_1268453 [Suillus bovinus]}	{NA}	{NA}	{NA}	{NA}	{GO:0008536; Ran GTPase binding; molecular_function GO:0006886; intracellular protein transport; biological_process}	{NA}	{NA}	{NA}	{NA}	{NA}	{PF03810:Importin-beta N-terminal domain}
A00659	{Contig10:1551225:1554831:+}	{KAG2116470.1; hypothetical protein F5147DRAFT_743099 [Suillus discolor]}	{NA}	{cput:CONPUDRAFT_120104; }	{NA}	{NA}	{NA}	{NA}	{NA}	{NA}	{NA}	{NA}	{NA}
A00660	{Contig10:1559906:1566643:+}	{KIK33322.1; hypothetical protein CY34DRAFT_38566, partial [Suillus luteus UH-Slu-Lm8-n1]}	{NA}	{NA}	{NA}	{NA}	{GO:0000723; telomere maintenance; biological_process GO:0003678; DNA helicase activity; molecular_function GO:0006281; DNA repair; biological_process}	{NA}	{NA}	{NA}	{NA}	{NA}	{PF05970:PIF1-like helicase}
A00661	{Contig10:1569584:1572810:+}	{KAG1734014.1; hypothetical protein EDD22DRAFT_960131 [Suillus occidentalis]}	{NA}	{NA}	{NA}	{NA}	{GO:0003676; nucleic acid binding; molecular_function GO:0008270; zinc ion binding; molecular_function}	{NA}	{NA}	{NA}	{NA}	{NA}	{PF00098:Zinc knuckle}
A00662	{Contig10:1573568:1574266:+}	{THG92494.1; hypothetical protein EW026_g8421 [Phlebia centrifuga]}	{P0CV72; Secreted RxLR effector protein 161 }	{adl:AURDEDRAFT_77562; }	{NA}	{NA}	{NA}	{NA}	{NA}	{NA}	{NA}	{NA}	{NA}
A00663	{Contig10:1576492:1576916:+}	{KAG1727455.1; hypothetical protein EDB91DRAFT_1315972 [Suillus paluster]}	{NA}	{NA}	{NA}	{NA}	{NA}	{NA}	{NA}	{NA}	{NA}	{NA}	{NA}
A00664	{Contig10:1577453:1579064:+}	{KAG2159078.1; glycoprotease family-domain-containing protein [Suillus bovinus]}	{B8GPT9; tRNA N6-adenosine threonylcarbamoyltransferase }	{sla:SERLADRAFT_448206; K01409 KAE1, tsaD, QRI7 N6-L-threonylcarbamoyladenine synthase 2.3.1.234 }	{NA}	{NA}	{NA}	{NA}	{NA}	{NA}	{NA}	{NA}	{NA}
A00665	{Contig10:1579312:1581122:-}	{KAG2137879.1; aldehyde dehydrogenase [Suillus bovinus]}	{NA}	{gtr:GLOTRDRAFT_110937; K00128 ALDH aldehyde dehydrogenase (NAD+) 1.2.1.3 Metabolism; Carbohydrate metabolism; Glycolysis / Gluconeogenesis [PATH:ko00010] Metabolism; Carbohydrate metabolism; Ascorbate and aldarate metabolism [PATH:ko00053] Metabolism; Lipid metabolism; Fatty acid degradation [PATH:ko00071] Metabolism; Amino acid metabolism; Valine, leucine and isoleucine degradation [PATH:ko0028…	{NA}	{NA}	{GO:0008152; NA GO:0016491; oxidoreductase activity; molecular_function GO:0055114; oxidation-reduction process; biological_process}	{NA}	{NA}	{NA}	{NA}	{NA}	{PF00171:Aldehyde dehydrogenase family}
A00666	{Contig10:1581963:1583696:+}	{KAG2138461.1; hypothetical protein DEU56DRAFT_944770 [Suillus clintonianus]}	{NA}	{NA}	{NA}	{NA}	{GO:0005794; Golgi apparatus; cellular_component GO:0006810; transport; biological_process}	{NA}	{NA}	{NA}	{NA}	{NA}	{PF09730:Microtubule-associated protein Bicaudal-D}
A00667	{Contig10:1583989:1584851:-}	{KAG2751286.1; hypothetical protein P692DRAFT_20727205 [Suillus brevipes Sb2]}	{NA}	{cput:CONPUDRAFT_92166; }	{NA}	{NA}	{NA}	{NA}	{NA}	{NA}	{NA}	{NA}	{NA}
A00668	{Contig10:1585491:1585757:-}	{KAG2150336.1; hypothetical protein EDB93DRAFT_1103554 [Suillus bovinus]}	{NA}	{NA}	{NA}	{NA}	{NA}	{NA}	{NA}	{NA}	{NA}	{NA}	{NA}
A00669	{Contig10:162260:164473:-}	{KAG2127575.1; hypothetical protein EDB93DRAFT_1256972 [Suillus bovinus]}	{NA}	{NA}	{NA}	{NA}	{NA}	{NA}	{NA}	{NA}	{NA}	{NA}	{NA}
A00670	{Contig10:1586100:1587255:-}	{KAG2159076.1; hypothetical protein EDB93DRAFT_1245631 [Suillus bovinus]}	{NA}	{sla:SERLADRAFT_468334; }	{NA}	{NA}	{NA}	{NA}	{NA}	{NA}	{NA}	{NA}	{NA}
A00671	{Contig10:1589376:1590947:+}	{KAG2159286.1; hypothetical protein EDB93DRAFT_1114841 [Suillus bovinus]}	{NA}	{sla:SERLADRAFT_360899; }	{NA}	{NA}	{GO:0016491; oxidoreductase activity; molecular_function GO:0016706; oxidoreductase activity, acting on paired donors, with incorporation or reduction of molecular oxygen, 2-oxoglutarate as one donor, and incorporation of one atom each of oxygen into both donors; molecular_function GO:0055114; oxidation-reduction process; biological_process}	{NA}	{NA}	{NA}	{NA}	{NA}	{PF03171:2OG-Fe(II) oxygenase superfamily}
A00672	{Contig10:1591456:1593353:-}	{KAG2159074.1; hypothetical protein EDB93DRAFT_441706 [Suillus bovinus]}	{NA}	{cput:CONPUDRAFT_163422; }	{NA}	{NA}	{GO:0008610; lipid biosynthetic process; biological_process GO:0008168; methyltransferase activity; molecular_function}	{NA}	{NA}	{NA}	{NA}	{NA}	{PF04989:Cephalosporin hydroxylase}
A00673	{Contig10:1596082:1598450:-}	{KAG2159073.1; hypothetical protein EDB93DRAFT_442357 [Suillus bovinus]}	{NA}	{hir:HETIRDRAFT_171573; }	{NA}	{NA}	{GO:0055114; oxidation-reduction process; biological_process GO:0016655; oxidoreductase activity, acting on NADH or NADPH, quinone or similar compound as acceptor; molecular_function GO:0005515; protein binding; molecular_function GO:0006814; sodium ion transport; biological_process}	{NA}	{NA}	{NA}	{NA}	{NA}	{PF13174:Tetratricopeptide repeat PF05896:Na(+)-translocating NADH-quinone reductase subunit A (NQRA)}
A00674	{Contig10:1599102:1600511:+}	{KAG2159071.1; RNA polymerase II transcription elongation factor-domain-containing protein [Suillus bovinus]}	{NA}	{lbc:LACBIDRAFT_303738; }	{NA}	{NA}	{GO:0007010; cytoskeleton organization; biological_process GO:0003779; actin binding; molecular_function GO:0003677; DNA binding; molecular_function}	{NA}	{NA}	{NA}	{NA}	{NA}	{PF00125:Core histone H2A/H2B/H3/H4 PF01213:Adenylate cyclase associated (CAP) N terminal}
A00675	{Contig10:1600672:1602081:-}	{KAG2159070.1; ferritin-like domain-containing protein [Suillus bovinus]}	{NA}	{hir:HETIRDRAFT_433320; }	{NA}	{NA}	{NA}	{NA}	{NA}	{NA}	{YES}	{NA}	{NA}
A00676	{Contig10:1602714:1604691:-}	{KAG2159069.1; peptidase S10 serine carboxypeptidase [Suillus bovinus]}	{Q96VC4; Carboxypeptidase Y homolog A }	{sla:SERLADRAFT_413693; }	{NA}	{NA}	{GO:0004185; serine-type carboxypeptidase activity; molecular_function GO:0006508; proteolysis; biological_process}	{NA}	{NA}	{NA}	{YES}	{QRV90103.1_; GT4 sucrose synthase (EC 2.4.1.13); sucrose-phosphate synthase (EC 2.4.1.14); alpha-glucosyltransferase (EC 2.4.1.52); lipopolysaccharide N-acetylglucosaminyltransferase (EC 2.4.1.56); phosphatidylinositol alpha-mannosyltransferase (EC 2.4.1.57); GDP-Man: Man1GlcNAc2-PP-dolichol alpha-1,3-mannosyltransferase (EC 2.4.1.132); GDP-Man: Man3GlcNAc2-PP-dolichol/Man4GlcNAc2-PP-dolichol al…	{PF00450:Serine carboxypeptidase}
A00677	{Contig10:1605015:1608786:+}	{PPQ97106.1; hypothetical protein CVT26_001011 [Gymnopilus dilepis]}	{Q4PBF2; Nucleolar protein 58 }	{cput:CONPUDRAFT_136949; K14565 NOP58 nucleolar protein 58 -- Genetic Information Processing; Translation; Ribosome biogenesis in eukaryotes [PATH:ko03008]}	{SPAC23G3.06; KOG2572 Ribosome biogenesis protein - Nop58p/Nop5p AJ RNA processing and modification ; Translation, ribosomal structure and biogenesis ;}	{NA}	{GO:0008152; NA GO:0016491; oxidoreductase activity; molecular_function GO:0004190; aspartic-type endopeptidase activity; molecular_function GO:0007131; reciprocal meiotic recombination; biological_process GO:0016021; integral to membrane; cellular_component GO:0006270; DNA-dependent DNA replication initiation; biological_process GO:0007059; chromosome segregation; biological_process GO:0019028; …	{NA}	{NA}	{NA}	{NA}	{QGI98299.1_; GH18 chitinase (EC 3.2.1.14); lysozyme (EC 3.2.1.17); endo-beta-N-acetylglucosaminidase (EC 3.2.1.96); peptidoglycan hydrolase with endo-beta-N-acetylglucosaminidase specificity (EC 3.2.1.-); Nod factor hydrolase (EC 3.2.1.-); xylanase inhibitor; concanavalin B; narbonin -}	{PF00106:short chain dehydrogenase PF02724:CDC45-like protein PF07267:Nucleopolyhedrovirus capsid protein P87 PF07964:Rec10 / Red1 PF01080:Presenilin}
A00678	{Contig10:1608890:1610256:-}	{KAG2745760.1; hypothetical protein P692DRAFT_20808700 [Suillus brevipes Sb2]}	{B0DK66; Cytoplasmic tRNA 2-thiolation protein 1 }	{sla:SERLADRAFT_460179; K14168 CTU1, NCS6 cytoplasmic tRNA 2-thiolation protein 1 2.7.7.- Genetic Information Processing; Folding, sorting and degradation; Sulfur relay system [PATH:ko04122]}	{SPBC2G5.03; KOG2840 Uncharacterized conserved protein with similarity to predicted ATPase of the PP-loop superfamily R General function prediction only ;}	{NA}	{GO:0019646; aerobic electron transport chain; biological_process GO:0008033; tRNA processing; biological_process GO:0005737; cytoplasm; cellular_component GO:0016740; transferase activity; molecular_function GO:0009055; NA}	{NA}	{NA}	{NA}	{NA}	{NA}	{PF01355:High potential iron-sulfur protein PF03054:tRNA methyl transferase}
A00679	{Contig10:1610434:1613343:+}	{KAG2159065.1; armadillo-type protein [Suillus bovinus]}	{A8P7F7; Nucleolar protein 9 }	{sla:SERLADRAFT_460183; K14790 NOP9 nucleolar protein 9 -- }	{NA}	{NA}	{NA}	{NA}	{NA}	{NA}	{NA}	{NA}	{NA}
A00680	{Contig10:20878:27491:+}	{NA}	{NA}	{NA}	{NA}	{NA}	{GO:0005515; protein binding; molecular_function}	{NA}	{NA}	{NA}	{NA}	{NA}	{PF00400:WD domain, G-beta repeat}
A00681	{Contig10:165453:166352:-}	{KAG2123304.1; hypothetical protein EDB93DRAFT_1259124 [Suillus bovinus]}	{NA}	{NA}	{NA}	{NA}	{NA}	{NA}	{NA}	{NA}	{NA}	{NA}	{NA}
A00682	{Contig10:1613705:1618703:-}	{KAG2159064.1; nucleoporin Nup120/160-domain-containing protein [Suillus bovinus]}	{NA}	{sla:SERLADRAFT_446435; K14303 NUP160, NUP120 nuclear pore complex protein Nup160 -- Genetic Information Processing; Translation; RNA transport [PATH:ko03013]}	{NA}	{NA}	{NA}	{NA}	{NA}	{NA}	{NA}	{NA}	{NA}
A00683	{Contig10:1620353:1620933:+}	{KAG1803391.1; hypothetical protein BJ212DRAFT_1285108 [Suillus subaureus]}	{NA}	{mrr:Moror_1590; }	{NA}	{NA}	{NA}	{NA}	{NA}	{NA}	{NA}	{NA}	{NA}
A00684	{Contig10:1621114:1622242:-}	{KAG2159062.1; cytochrome b5-like heme/steroid binding domain-containing protein [Suillus bovinus]}	{NA}	{cput:CONPUDRAFT_103656; }	{NA}	{NA}	{GO:0020037; heme binding; molecular_function}	{NA}	{NA}	{NA}	{NA}	{NA}	{PF00173:Cytochrome b5-like Heme/Steroid binding domain}
A00685	{Contig10:1622999:1627960:-}	{KAG2159061.1; regulator of G protein signaling domain-containing protein [Suillus bovinus]}	{NA}	{sla:SERLADRAFT_360055; K19838 SST2 GTPase-activating protein SST2 -- Environmental Information Processing; Signal transduction; MAPK signaling pathway - yeast [PATH:ko04011]}	{NA}	{NA}	{GO:0038032; NA GO:0035556; intracellular signal transduction; biological_process}	{PHI:345; Q69FA8 CRG1 5207 Cryptococcus neoformans Cryptococcosis Mus musculus (related: house mouse) G-protein gene disruption; gene complementation increased virulence (hypervirulence)}	{Q69FA8_CRYNE; NULL AAR06257.1 640 Cryptococcus neoformans 40410 SIMILARITY: Contains 1 RGS domain. Unknown Unknown {ID:PF00615; Description: RGS} humans vertebrata cryptococcosis Cryptococcosis {ID:0004871; Method: IEA:InterPro; Description: F:signal transducer activity} {ID:0035556; Method: IEA:InterPro; Description: P:intracellular signal transduction}}	{NA}	{NA}	{NA}	{PF00615:Regulator of G protein signaling domain PF00610:Domain found in Dishevelled, Egl-10, and Pleckstrin (DEP)}
A00686	{Contig10:1628229:1629377:+}	{KAG1828802.1; hypothetical protein EV424DRAFT_1536271 [Suillus variegatus]}	{NA}	{shs:STEHIDRAFT_155506; }	{NA}	{NA}	{GO:0005515; protein binding; molecular_function GO:0005672; transcription factor TFIIA complex; cellular_component GO:0006367; transcription initiation from RNA polymerase II promoter; biological_process}	{NA}	{NA}	{NA}	{NA}	{NA}	{PF13949:ALIX V-shaped domain binding to HIV PF03153:Transcription factor IIA, alpha/beta subunit}
A00687	{Contig10:1630389:1632398:+}	{KAG2159059.1; alpha/beta-hydrolase [Suillus bovinus]}	{NA}	{mrr:Moror_1594; }	{NA}	{NA}	{NA}	{NA}	{NA}	{NA}	{NA}	{NA}	{NA}
A00688	{Contig10:1632631:1634272:-}	{KAG1902908.1; hypothetical protein F5891DRAFT_1186044 [Suillus fuscotomentosus]}	{Q8NBZ7; UDP-glucuronic acid decarboxylase 1 }	{sla:SERLADRAFT_460192; K08678 UXS1, uxs UDP-glucuronate decarboxylase 4.1.1.35 Metabolism; Carbohydrate metabolism; Amino sugar and nucleotide sugar metabolism [PATH:ko00520] Metabolism; Global and overview maps; Metabolic pathways [PATH:ko01100]}	{7295149; KOG1429 dTDP-glucose 4-6-dehydratase/UDP-glucuronic acid decarboxylase GM Carbohydrate transport and metabolism ; Cell wall/membrane/envelope biogenesis ;}	{NA}	{GO:0008762; UDP-N-acetylmuramate dehydrogenase activity; molecular_function GO:0045226; extracellular polysaccharide biosynthetic process; biological_process GO:0016616; oxidoreductase activity, acting on the CH-OH group of donors, NAD or NADP as acceptor; molecular_function GO:0044237; cellular metabolic process; biological_process GO:0050662; coenzyme binding; molecular_function GO:0055114; ox…	{PHI:274; Q7LJU0 USX1 5207 Cryptococcus neoformans Cryptococcosis Mus musculus (related: house mouse) UDP-xylose synthase gene disruption; gene complementation loss of pathogenicity}	{Q7LJU0_CRYNE; UXS1 AAM22494.1 410 Cryptococcus neoformans 40410 Unknown 12139628 Unknown {ID:PF01370; Description: Epimerase} {ID:PF11803; Description: Epimerase} humans vertebrata cryptococcosis Cryptococcosis {ID:0050662; Method: IEA:InterPro; Description: F:coenzyme binding} {ID:0048040; Method: IEA:InterPro; Description: F:UDP-glucuronate decarboxylase activity} {ID:0044237; Method: IEA:Inte…	{NA}	{NA}	{NA}	{PF02719:Polysaccharide biosynthesis protein PF01073:3-beta hydroxysteroid dehydrogenase/isomerase family PF04321:RmlD substrate binding domain PF02873:UDP-N-acetylenolpyruvoylglucosamine reductase, C-terminal domain PF01370:NAD dependent epimerase/dehydratase family}
A00689	{Contig10:1634603:1635351:+}	{KAG2159056.1; Bystin-domain-containing protein, partial [Suillus bovinus]}	{NA}	{scm:SCHCODRAFT_13088; K14797 ENP1, BYSL essential nuclear protein 1 -- }	{NA}	{NA}	{GO:0005634; nucleus; cellular_component GO:0008270; zinc ion binding; molecular_function GO:0000398; nuclear mRNA splicing, via spliceosome; biological_process GO:0005681; spliceosomal complex; cellular_component}	{NA}	{NA}	{NA}	{NA}	{NA}	{PF04889:Cwf15/Cwc15 cell cycle control protein PF06524:NOA36 protein}
A00690	{Contig10:1635530:1636310:+}	{KAG2159056.1; Bystin-domain-containing protein, partial [Suillus bovinus]}	{O60071; Uncharacterized protein C13G1.09 }	{cput:CONPUDRAFT_165047; K14797 ENP1, BYSL essential nuclear protein 1 -- }	{SPBC13G1.09; KOG3871 Cell adhesion complex protein bystin W Extracellular structures ;}	{NA}	{NA}	{NA}	{NA}	{NA}	{NA}	{NA}	{NA}
A00691	{Contig10:1639821:1641953:-}	{KAG2159054.1; laccase [Suillus bovinus]}	{Q99056; Laccase-5 }	{cput:CONPUDRAFT_140197; K19791 FET3_5 iron transport multicopper oxidase -- }	{NA}	{NA}	{GO:0005507; copper ion binding; molecular_function GO:0055114; oxidation-reduction process; biological_process GO:0016491; oxidoreductase activity; molecular_function}	{NA}	{NA}	{NA}	{NA}	{EGN96947.1_; AA1_1 }	{PF07731:Multicopper oxidase PF00394:Multicopper oxidase PF07732:Multicopper oxidase}
A00692	{Contig10:166767:169714:-}	{KAG2128340.1; hypothetical protein EDB93DRAFT_1256685 [Suillus bovinus]}	{NA}	{NA}	{NA}	{NA}	{NA}	{NA}	{NA}	{NA}	{NA}	{NA}	{NA}
A00693	{Contig10:1648901:1651475:+}	{KAG2159053.1; fungal-specific transcription factor domain-containing protein [Suillus bovinus]}	{NA}	{sla:SERLADRAFT_434982; }	{NA}	{NA}	{GO:0006351; transcription, DNA-dependent; biological_process GO:0008270; zinc ion binding; molecular_function GO:0005634; nucleus; cellular_component GO:0003677; DNA binding; molecular_function}	{NA}	{NA}	{NA}	{NA}	{NA}	{PF04082:Fungal specific transcription factor domain }
A00694	{Contig10:1653659:1654716:-}	{KAG2757828.1; hypothetical protein P692DRAFT_20824651 [Suillus brevipes Sb2]}	{NA}	{NA}	{NA}	{NA}	{NA}	{NA}	{NA}	{NA}	{NA}	{NA}	{NA}
A00695	{Contig10:1656149:1658279:+}	{KAG2159050.1; chaperone [Suillus bovinus]}	{Q9USI5; Heat shock protein sti1 homolog }	{hir:HETIRDRAFT_473128; K09553 STIP1 stress-induced-phosphoprotein 1 -- Human Diseases; Neurodegenerative diseases; Prion diseases [PATH:ko05020]}	{SPCC645.14c; KOG0548 Molecular co-chaperone STI1 O Posttranslational modification, protein turnover, chaperones ;}	{NA}	{GO:0006260; DNA replication; biological_process GO:0005524; ATP binding; molecular_function GO:0003678; DNA helicase activity; molecular_function GO:0005515; protein binding; molecular_function}	{NA}	{NA}	{NA}	{NA}	{NA}	{PF13174:Tetratricopeptide repeat PF00772:DnaB-like helicase N terminal domain PF13176:Tetratricopeptide repeat PF00515:Tetratricopeptide repeat PF13181:Tetratricopeptide repeat}
A00696	{Contig10:1658416:1660523:-}	{KAG2151833.1; Aldo/keto reductase family-domain-containing protein [Suillus cothurnatus]}	{NA}	{sla:SERLADRAFT_460225; }	{NA}	{NA}	{NA}	{NA}	{NA}	{NA}	{NA}	{NA}	{NA}
A00697	{Contig10:1660932:1669777:-}	{KAG2053543.1; DNA/RNA polymerase [Suillus hirtellus]}	{NA}	{sla:SERLADRAFT_363576; K10908 POLRMT, RPO41 DNA-directed RNA polymerase, mitochondrial 2.7.7.6 }	{NA}	{NA}	{GO:0003899; DNA-directed RNA polymerase activity; molecular_function GO:0016020; membrane; cellular_component GO:0008134; transcription factor binding; molecular_function GO:0045502; dynein binding; molecular_function GO:0042803; protein homodimerization activity; molecular_function GO:0006351; transcription, DNA-dependent; biological_process GO:0003911; DNA ligase (NAD+) activity; molecular_fun…	{NA}	{NA}	{NA}	{NA}	{NA}	{PF13851:Growth-arrest specific micro-tubule binding PF10473:Leucine-rich repeats of kinetochore protein Cenp-F/LEK1 PF00940:DNA-dependent RNA polymerase PF01653:NAD-dependent DNA ligase adenylation domain PF06818:Fez1}
A00698	{Contig10:1670240:1670804:+}	{KAG2159044.1; Isochorismatase-like protein [Suillus bovinus]}	{G4YEI5; Secreted isochorismatase effector Isc1 }	{sla:SERLADRAFT_460236; }	{7291830; KOG4044 Mitochondrial associated endoribonuclease MAR1 (isochorismatase superfamily) R General function prediction only ;}	{NA}	{GO:0008152; NA GO:0003824; NA}	{NA}	{NA}	{NA}	{NA}	{NA}	{PF00857:Isochorismatase family}
A00699	{Contig10:1671891:1673040:-}	{KAG2159043.1; Manganese/iron superoxide dismutase [Suillus bovinus]}	{NA}	{sla:SERLADRAFT_360066; K04564 SOD2 superoxide dismutase, Fe-Mn family 1.15.1.1 Environmental Information Processing; Signal transduction; MAPK signaling pathway - fly [PATH:ko04013] Environmental Information Processing; Signal transduction; FoxO signaling pathway [PATH:ko04068] Cellular Processes; Transport and catabolism; Peroxisome [PATH:ko04146] Organismal Systems; Aging; Longevity regulating…	{NA}	{NA}	{GO:0046872; metal ion binding; molecular_function GO:0006801; superoxide metabolic process; biological_process GO:0004784; superoxide dismutase activity; molecular_function GO:0055114; oxidation-reduction process; biological_process}	{NA}	{NA}	{NA}	{NA}	{NA}	{PF02777:Iron/manganese superoxide dismutases, C-terminal domain}
A00700	{Contig10:1673234:1673709:+}	{KAG2159042.1; DAD/Ost2 [Suillus bovinus]}	{P46967; Dolichyl-diphosphooligosaccharide--protein glycosyltransferase subunit dad1 }	{sla:SERLADRAFT_413707; K12668 OST2, DAD1 oligosaccharyltransferase complex subunit epsilon -- Metabolism; Glycan biosynthesis and metabolism; N-Glycan biosynthesis [PATH:ko00510] Metabolism; Glycan biosynthesis and metabolism; Various types of N-glycan biosynthesis [PATH:ko00513] Metabolism; Global and overview maps; Metabolic pathways [PATH:ko01100] Genetic Information Processing; Folding, sort…	{Hs4503253; KOG1746 Defender against cell death protein/oligosaccharyltransferase, epsilon subunit DO Cell cycle control, cell division, chromosome partitioning ; Posttranslational modification, protein turnover, chaperones ;}	{gnl|TC-DB|P61803; 9.B.142.3.17 Dolichyl-diphosphooligosaccharide--protein glycosyltransferase subunit DAD1 OS=Homo sapiens OX=9606 GN=DAD1 PE=1 SV=3}	{GO:0008250; oligosaccharyltransferase complex; cellular_component GO:0004579; dolichyl-diphosphooligosaccharide-protein glycotransferase activity; molecular_function GO:0016021; integral to membrane; cellular_component}	{NA}	{NA}	{NA}	{NA}	{NA}	{PF02109:DAD family}
A00701	{Contig10:1673845:1674328:-}	{KAG2029623.1; DUF1748-domain-containing protein [Suillus americanus|Suillus spraguei]}	{Q2V2P4; Uncharacterized protein YIL156W-B }	{sla:SERLADRAFT_381629; }	{NA}	{NA}	{NA}	{NA}	{NA}	{NA}	{YES}	{NA}	{NA}
A00702	{Contig10:1675777:1677641:-}	{KAG2159040.1; clathrin adaptor mu subunit [Suillus bovinus]}	{NA}	{sla:SERLADRAFT_366752; K12398 AP3M AP-3 complex subunit mu -- Cellular Processes; Transport and catabolism; Lysosome [PATH:ko04142]}	{NA}	{NA}	{GO:0016192; vesicle-mediated transport; biological_process GO:0006886; intracellular protein transport; biological_process GO:0030131; clathrin adaptor complex; cellular_component GO:0005515; protein binding; molecular_function}	{NA}	{NA}	{NA}	{NA}	{NA}	{PF00928:Adaptor complexes medium subunit family}
A00703	{Contig10:172143:173209:-}	{KAG2146690.1; hypothetical protein DEU56DRAFT_978561 [Suillus clintonianus]}	{NA}	{NA}	{NA}	{NA}	{NA}	{NA}	{NA}	{NA}	{NA}	{NA}	{NA}
A00704	{Contig10:1678166:1680233:+}	{KAG2159039.1; hypothetical protein EDB93DRAFT_1117766 [Suillus bovinus]}	{NA}	{sla:SERLADRAFT_434990; K00844 HK hexokinase 2.7.1.1 Metabolism; Carbohydrate metabolism; Glycolysis / Gluconeogenesis [PATH:ko00010] Metabolism; Carbohydrate metabolism; Fructose and mannose metabolism [PATH:ko00051] Metabolism; Carbohydrate metabolism; Galactose metabolism [PATH:ko00052] Metabolism; Carbohydrate metabolism; Starch and sucrose metabolism [PATH:ko00500] Metabolism; Carbohydrate m…	{NA}	{NA}	{GO:0005975; carbohydrate metabolic process; biological_process GO:0016773; phosphotransferase activity, alcohol group as acceptor; molecular_function GO:0005524; ATP binding; molecular_function}	{NA}	{NA}	{NA}	{NA}	{NA}	{PF00349:Hexokinase PF03727:Hexokinase}
A00705	{Contig10:1685539:1687087:-}	{KAG2159034.1; hypothetical protein EDB93DRAFT_1245592 [Suillus bovinus]}	{NA}	{cput:CONPUDRAFT_136968; K09051 SKO1, ATF1, PCR1 ATF/CREB family transcription factor -- Environmental Information Processing; Signal transduction; MAPK signaling pathway - yeast [PATH:ko04011]}	{NA}	{NA}	{GO:0043565; sequence-specific DNA binding; molecular_function GO:0006355; regulation of transcription, DNA-dependent; biological_process GO:0003700; sequence-specific DNA binding transcription factor activity; molecular_function GO:0005634; nucleus; cellular_component GO:0003677; DNA binding; molecular_function}	{NA}	{NA}	{NA}	{NA}	{NA}	{PF03131:bZIP Maf transcription factor PF07716:Basic region leucine zipper PF00170:bZIP transcription factor}
A00706	{Contig10:1687464:1689367:-}	{KAG2159033.1; hypothetical protein EDB93DRAFT_1117737 [Suillus bovinus]}	{NA}	{sla:SERLADRAFT_460255; }	{NA}	{NA}	{NA}	{NA}	{NA}	{NA}	{NA}	{NA}	{NA}
A00707	{Contig10:1690081:1690906:+}	{KAG1820559.1; ATP7, subunit D of the stator stalk of mitochondrial F1F0 ATP synthase [Suillus subaureus]}	{Q6CFH9; ATP synthase subunit d, mitochondrial }	{sla:SERLADRAFT_446452; K02138 ATPeF0D, ATP5H, ATP7 F-type H+-transporting ATPase subunit d -- Metabolism; Energy metabolism; Oxidative phosphorylation [PATH:ko00190] Metabolism; Global and overview maps; Metabolic pathways [PATH:ko01100] Organismal Systems; Environmental adaptation; Thermogenesis [PATH:ko04714] Human Diseases; Neurodegenerative diseases; Alzheimer disease [PATH:ko05010] Human Di…	{YKL016c; KOG3366 Mitochondrial F1F0-ATP synthase, subunit d/ATP7 C Energy production and conversion ;}	{gnl|TC-DB|P30902; 3.A.2.1.3 ATP SYNTHASE D CHAIN, MITOCHONDRIAL (EC 3.6.1.34) - Saccharomyces cerevisiae (Baker's yeast).}	{GO:0000276; mitochondrial proton-transporting ATP synthase complex, coupling factor F(o); cellular_component GO:0005198; NA GO:0015078; hydrogen ion transmembrane transporter activity; molecular_function GO:0015986; ATP synthesis coupled proton transport; biological_process}	{NA}	{NA}	{NA}	{NA}	{NA}	{PF05873:ATP synthase D chain, mitochondrial (ATP5H) PF06810:Phage minor structural protein GP20}
A00708	{Contig10:1691526:1693066:+}	{KAG2159031.1; hypothetical protein EDB93DRAFT_439518 [Suillus bovinus]}	{NA}	{sla:SERLADRAFT_460263; }	{NA}	{NA}	{NA}	{NA}	{NA}	{NA}	{NA}	{NA}	{NA}
A00709	{Contig10:1693235:1696766:-}	{KAG2159030.1; adenosine deaminase/editase [Suillus bovinus]}	{NA}	{dsq:DICSQDRAFT_56976; K15440 TAD1, ADAT1 tRNA-specific adenosine deaminase 1 3.5.4.34 }	{NA}	{NA}	{GO:0006396; RNA processing; biological_process GO:0004000; adenosine deaminase activity; molecular_function GO:0003723; RNA binding; molecular_function}	{NA}	{NA}	{NA}	{NA}	{NA}	{PF02137:Adenosine-deaminase (editase) domain}
A00710	{Contig10:1698816:1703484:-}	{KAG2119110.1; hypothetical protein F5147DRAFT_626619 [Suillus discolor]}	{NA}	{gtr:GLOTRDRAFT_110634; }	{NA}	{NA}	{NA}	{NA}	{NA}	{NA}	{NA}	{NA}	{NA}
A00711	{Contig10:1704052:1705101:+}	{KAG2159026.1; putative methyltransferase-domain-containing protein [Suillus bovinus]}	{Q5BLD8; Protein N-lysine methyltransferase METTL21A }	{sla:SERLADRAFT_460279; K21804 METTL21A protein N-lysine methyltransferase METTL21A 2.1.1.- }	{NA}	{NA}	{NA}	{NA}	{NA}	{NA}	{NA}	{NA}	{NA}
A00712	{Contig10:1705804:1707587:+}	{KAG2159024.1; cytochrome oxidase assembly protein-domain-containing protein [Suillus bovinus]}	{P40086; Cytochrome c oxidase assembly protein COX15 }	{sla:SERLADRAFT_460287; K02259 COX15, ctaA cytochrome c oxidase assembly protein subunit 15 -- Metabolism; Energy metabolism; Oxidative phosphorylation [PATH:ko00190] Metabolism; Metabolism of cofactors and vitamins; Porphyrin and chlorophyll metabolism [PATH:ko00860] Metabolism; Global and overview maps; Metabolic pathways [PATH:ko01100] Metabolism; Global and overview maps; Biosynthesis of seco…	{YER141w; KOG2725 Cytochrome oxidase assembly factor COX15 O Posttranslational modification, protein turnover, chaperones ;}	{NA}	{GO:0006784; heme a biosynthetic process; biological_process GO:0034257; nicotinamide riboside transporter activity; molecular_function GO:0016020; membrane; cellular_component GO:0016627; oxidoreductase activity, acting on the CH-CH group of donors; molecular_function GO:0055114; oxidation-reduction process; biological_process GO:0034258; nicotinamide riboside transport; biological_process}	{PHI:503; P40086 COX15 4932 Saccharomyces cerevisiae No Data Found Mus musculus (related: house mouse) Cytochrome c oxidase assembly gene deletion reduced virulence}	{NA}	{NA}	{NA}	{NA}	{PF04973:Nicotinamide mononucleotide transporter PF02628:Cytochrome oxidase assembly protein}
A00713	{Contig10:1707759:1708867:-}	{KAG2159023.1; 20S proteasome subunit [Suillus bovinus]}	{Q3T0X5; Proteasome subunit alpha type-1 }	{lbc:LACBIDRAFT_189531; K02725 PSMA1 20S proteasome subunit alpha 6 3.4.25.1 Genetic Information Processing; Folding, sorting and degradation; Proteasome [PATH:ko03050]}	{Hs4506179; KOG0863 20S proteasome, regulatory subunit alpha type PSMA1/PRE5 O Posttranslational modification, protein turnover, chaperones ;}	{NA}	{GO:0004175; endopeptidase activity; molecular_function GO:0019773; proteasome core complex, alpha-subunit complex; cellular_component GO:0051603; proteolysis involved in cellular protein catabolic process; biological_process GO:0005839; proteasome core complex; cellular_component GO:0006511; ubiquitin-dependent protein catabolic process; biological_process GO:0004298; threonine-type endopeptidas…	{NA}	{NA}	{NA}	{NA}	{NA}	{PF10584:Proteasome subunit A N-terminal signature PF00227:Proteasome subunit}
A00714	{Contig10:173621:174319:+}	{KAG0692514.1; hypothetical protein DFH29DRAFT_817491, partial [Suillus ampliporus]}	{NA}	{lbc:LACBIDRAFT_328218; }	{NA}	{NA}	{NA}	{NA}	{NA}	{NA}	{NA}	{NA}	{NA}
A00715	{Contig10:1709177:1710476:+}	{KAG2159022.1; hypothetical protein EDB93DRAFT_1075588 [Suillus bovinus]}	{NA}	{sla:SERLADRAFT_491625; }	{NA}	{NA}	{GO:0045046; protein import into peroxisome membrane; biological_process GO:0032403; protein complex binding; molecular_function GO:0005779; integral to peroxisomal membrane; cellular_component}	{NA}	{NA}	{NA}	{NA}	{NA}	{PF07163:Pex26 protein}
A00716	{Contig10:1712730:1716063:-}	{KAG2159020.1; Mechanosensitive ion channel-domain-containing protein [Suillus bovinus]}	{NA}	{sla:SERLADRAFT_360076; K22048 MSL4S mechanosensitive ion channel protein 4/5/6/7/8/9/10 -- }	{NA}	{NA}	{GO:0016020; membrane; cellular_component GO:0005509; calcium ion binding; molecular_function GO:0055085; transmembrane transport; biological_process}	{NA}	{NA}	{NA}	{NA}	{NA}	{PF00036:EF hand PF13499:EF-hand domain pair PF13202:EF hand PF13405:EF-hand domain PF00924:Mechanosensitive ion channel}
A00717	{Contig10:1716531:1721124:+}	{KAG1792461.1; hypothetical protein HD556DRAFT_1444458 [Suillus plorans]}	{NA}	{cput:CONPUDRAFT_165070; K02725 PSMA1 20S proteasome subunit alpha 6 3.4.25.1 Genetic Information Processing; Folding, sorting and degradation; Proteasome [PATH:ko03050]}	{NA}	{NA}	{NA}	{NA}	{NA}	{NA}	{NA}	{NA}	{NA}
A00718	{Contig10:1721327:1722949:+}	{KIK43223.1; carbohydrate-binding module family 48 protein [Suillus luteus UH-Slu-Lm8-n1]}	{NA}	{NA}	{NA}	{NA}	{NA}	{NA}	{NA}	{NA}	{NA}	{NA}	{NA}
A00719	{Contig10:1723181:1727688:-}	{OJA15632.1; hypothetical protein AZE42_04847 [Rhizopogon vesiculosus]}	{NA}	{scm:SCHCODRAFT_72443; K14416 HBS1 elongation factor 1 alpha-like protein -- Genetic Information Processing; Translation; mRNA surveillance pathway [PATH:ko03015] Human Diseases; Infectious diseases: Bacterial; Legionellosis [PATH:ko05134]}	{NA}	{NA}	{GO:0003924; GTPase activity; molecular_function GO:0005525; GTP binding; molecular_function}	{NA}	{NA}	{NA}	{NA}	{NA}	{PF00009:Elongation factor Tu GTP binding domain PF03144:Elongation factor Tu domain 2 PF01926:50S ribosome-binding GTPase PF02263:Guanylate-binding protein, N-terminal domain PF03143:Elongation factor Tu C-terminal domain}
A00720	{Contig10:1728087:1728744:+}	{KAG2159014.1; hypothetical protein EDB93DRAFT_1237782 [Suillus bovinus]}	{NA}	{psq:PUNSTDRAFT_119334; }	{NA}	{NA}	{GO:0003697; single-stranded DNA binding; molecular_function}	{NA}	{NA}	{NA}	{NA}	{NA}	{PF00436:Single-strand binding protein family}
A00721	{Contig10:1728848:1729756:-}	{KAG2159013.1; hypothetical protein EDB93DRAFT_1237781 [Suillus bovinus]}	{NA}	{sla:SERLADRAFT_435012; }	{NA}	{NA}	{NA}	{NA}	{NA}	{NA}	{NA}	{NA}	{NA}
A00722	{Contig10:1730212:1739158:+}	{KAG1780351.1; cyclin-dependent protein kinase inhibitor [Suillus placidus]}	{NA}	{cci:CC1G_01320; K06653 PHO81 CDK inhibitor PHO81 -- Cellular Processes; Cell growth and death; Cell cycle - yeast [PATH:ko04111]}	{NA}	{NA}	{GO:0006071; glycerol metabolic process; biological_process GO:0008270; zinc ion binding; molecular_function GO:0008889; glycerophosphodiester phosphodiesterase activity; molecular_function GO:0046872; metal ion binding; molecular_function GO:0005515; protein binding; molecular_function}	{NA}	{NA}	{NA}	{NA}	{NA}	{PF00023:Ankyrin repeat PF13639:Ring finger domain PF03009:Glycerophosphoryl diester phosphodiesterase family PF00097:Zinc finger, C3HC4 type (RING finger) PF13606:Ankyrin repeat}
A00723	{Contig10:1739310:1741683:-}	{KAG2159009.1; P-loop containing nucleoside triphosphate hydrolase protein [Suillus bovinus]}	{NA}	{sla:SERLADRAFT_366786; }	{NA}	{NA}	{GO:0005524; ATP binding; molecular_function GO:0016887; ATPase activity; molecular_function}	{NA}	{NA}	{NA}	{NA}	{NA}	{PF00005:ABC transporter}
A00724	{Contig10:1743165:1744312:+}	{KAG2159008.1; hypothetical protein EDB93DRAFT_1076273 [Suillus bovinus]}	{O13774; GTP cyclohydrolase 1 }	{mrr:Moror_1419; K01495 GCH1, folE GTP cyclohydrolase IA 3.5.4.16 Metabolism; Metabolism of cofactors and vitamins; Folate biosynthesis [PATH:ko00790] Metabolism; Global and overview maps; Metabolic pathways [PATH:ko01100]}	{SPAC17A5.13; KOG2698 GTP cyclohydrolase I H Coenzyme transport and metabolism ;}	{NA}	{NA}	{NA}	{NA}	{NA}	{NA}	{NA}	{NA}
A00725	{Contig10:177462:180297:-}	{KAG1736066.1; hypothetical protein EDD22DRAFT_959838 [Suillus occidentalis]}	{NA}	{NA}	{NA}	{NA}	{NA}	{NA}	{NA}	{NA}	{NA}	{NA}	{NA}
A00726	{Contig10:1744525:1751983:-}	{KAG2159007.1; transcription factor/nuclear export subunit protein 2-domain-containing protein [Suillus bovinus]}	{NA}	{cput:CONPUDRAFT_89911; K12879 THOC2 THO complex subunit 2 -- Genetic Information Processing; Translation; RNA transport [PATH:ko03013] Genetic Information Processing; Transcription; Spliceosome [PATH:ko03040]}	{NA}	{NA}	{NA}	{NA}	{NA}	{NA}	{NA}	{NA}	{NA}
A00727	{Contig10:1754255:1756033:+}	{KAG2159006.1; hypothetical protein EDB93DRAFT_1117574 [Suillus bovinus]}	{NA}	{sla:SERLADRAFT_460352; K07300 chaA, CAX Ca2+:H+ antiporter -- }	{NA}	{NA}	{GO:0055085; transmembrane transport; biological_process GO:0016021; integral to membrane; cellular_component}	{NA}	{NA}	{NA}	{NA}	{NA}	{PF01699:Sodium/calcium exchanger protein}
A00728	{Contig10:1756970:1761258:-}	{KAG2159005.1; CHAT domain-containing protein [Suillus bovinus]}	{NA}	{sla:SERLADRAFT_417975; }	{NA}	{NA}	{NA}	{NA}	{NA}	{NA}	{NA}	{NA}	{NA}
A00729	{Contig10:1762834:1767190:-}	{KAG1900474.1; hypothetical protein F5891DRAFT_1278351 [Suillus fuscotomentosus]}	{NA}	{NA}	{NA}	{NA}	{GO:0019079; viral genome replication; biological_process GO:0005524; ATP binding; molecular_function GO:0005515; protein binding; molecular_function GO:0043531; ADP binding; molecular_function GO:0070008; serine-type exopeptidase activity; molecular_function GO:0004252; serine-type endopeptidase activity; molecular_function GO:0003724; RNA helicase activity; molecular_function GO:0003723; RNA bi…	{NA}	{NA}	{NA}	{NA}	{NA}	{PF00910:RNA helicase PF01057:Parvovirus non-structural protein NS1 PF00931:NB-ARC domain PF00400:WD domain, G-beta repeat PF02897:Prolyl oligopeptidase, N-terminal beta-propeller domain PF00004:ATPase family associated with various cellular activities (AAA)}
A00730	{Contig10:1768257:1770592:+}	{KAG2134915.1; Alpha/Beta hydrolase protein [Suillus bovinus]}	{D4AQA7; Probable serine carboxypeptidase ARB_06414 }	{sla:SERLADRAFT_446295; K01288 KEX1 carboxypeptidase D 3.4.16.6 }	{NA}	{NA}	{GO:0006508; proteolysis; biological_process GO:0004185; serine-type carboxypeptidase activity; molecular_function}	{NA}	{Q4PDC5_USTMA; UM01888.1 EAK82769.1 583 Ustilago maydis 237631 CAUTION: The sequence shown here is derived from an EMBL/GenBank/DDBJ whole genome shotgun (WGS) entry which is preliminary data. 17080091 XP_758035.1, XM_752942.1 {ID:PF00450; Description: Peptidase_S10} Euchlaena spp., Zea spp. (Poaceae) herb Smut. Corn smut Smut {ID:0004185; Method: IEA:InterPro; Description: F:serine-type carboxyp…	{NA}	{YES}	{QRV94664.1_; GH0 Glycoside hydrolases not yet assigned to a family. -}	{PF00450:Serine carboxypeptidase}
A00731	{Contig10:1771280:1772514:-}	{KAG1874781.1; acyltransferase-domain-containing protein [Suillus subalutaceus]}	{NA}	{gtr:GLOTRDRAFT_63959; K13511 TAZ monolysocardiolipin acyltransferase 2.3.1.- Metabolism; Lipid metabolism; Glycerophospholipid metabolism [PATH:ko00564]}	{NA}	{NA}	{GO:0008152; NA GO:0016746; transferase activity, transferring acyl groups; molecular_function}	{NA}	{NA}	{NA}	{NA}	{NA}	{PF01553:Acyltransferase}
A00732	{Contig10:1773552:1782840:-}	{KAG2158999.1; MRC1-like domain-containing protein [Suillus bovinus]}	{NA}	{NA}	{NA}	{NA}	{NA}	{NA}	{NA}	{NA}	{NA}	{NA}	{NA}
A00733	{Contig10:1789669:1792492:-}	{KAG1734014.1; hypothetical protein EDD22DRAFT_960131 [Suillus occidentalis]}	{NA}	{NA}	{NA}	{NA}	{GO:0015074; DNA integration; biological_process GO:0009399; nitrogen fixation; biological_process}	{NA}	{NA}	{NA}	{NA}	{NA}	{PF03206:Nitrogen fixation protein NifW PF00665:Integrase core domain}
A00734	{Contig10:1794709:1795017:+}	{KAG2144564.1; hypothetical protein DEU56DRAFT_692031, partial [Suillus clintonianus]}	{NA}	{NA}	{NA}	{NA}	{NA}	{NA}	{NA}	{NA}	{NA}	{NA}	{NA}
A00735	{Contig10:1795303:1796124:+}	{KIK32468.1; hypothetical protein CY34DRAFT_101448 [Suillus luteus UH-Slu-Lm8-n1]}	{NA}	{NA}	{NA}	{NA}	{GO:0015074; DNA integration; biological_process}	{NA}	{NA}	{NA}	{NA}	{NA}	{PF00665:Integrase core domain}
A00736	{Contig10:180680:184333:-}	{KAG2151046.1; hypothetical protein EDB93DRAFT_1083581 [Suillus bovinus]}	{NA}	{sla:SERLADRAFT_443529; }	{NA}	{NA}	{GO:0006352; transcription initiation, DNA-dependent; biological_process GO:0006355; regulation of transcription, DNA-dependent; biological_process GO:0016987; sigma factor activity; molecular_function GO:0003700; sequence-specific DNA binding transcription factor activity; molecular_function GO:0003677; DNA binding; molecular_function}	{NA}	{NA}	{NA}	{NA}	{NA}	{PF04546:Sigma-70, non-essential region}
A00737	{Contig10:1797518:1798267:+}	{KIK15964.1; hypothetical protein PISMIDRAFT_44505, partial [Pisolithus microcarpus 441]}	{NA}	{NA}	{NA}	{NA}	{NA}	{NA}	{NA}	{NA}	{NA}	{NA}	{NA}
A00738	{Contig10:1798367:1799101:+}	{KIK15336.1; hypothetical protein PISMIDRAFT_115347 [Pisolithus microcarpus 441]}	{P0CV72; Secreted RxLR effector protein 161 }	{cdu:CD36_22480; }	{NA}	{NA}	{NA}	{NA}	{NA}	{NA}	{NA}	{NA}	{NA}
A00739	{Contig10:1802242:1804085:+}	{THH14808.1; hypothetical protein EUX98_g9559 [Antrodiella citrinella]}	{NA}	{mrr:Moror_16976; }	{NA}	{NA}	{NA}	{NA}	{NA}	{NA}	{NA}	{NA}	{NA}
A00740	{Contig10:1812771:1827633:+}	{KAG1897260.1; hypothetical protein F5891DRAFT_982853 [Suillus fuscotomentosus]}	{NA}	{cput:CONPUDRAFT_158364; }	{NA}	{NA}	{NA}	{NA}	{NA}	{NA}	{NA}	{NA}	{NA}
A00741	{Contig10:1832093:1833619:-}	{KAG1759296.1; hypothetical protein EDD22DRAFT_956003 [Suillus occidentalis]}	{NA}	{NA}	{NA}	{NA}	{NA}	{NA}	{NA}	{NA}	{NA}	{NA}	{NA}
A00742	{Contig10:1833960:1834490:-}	{KAG1750996.1; hypothetical protein EDD22DRAFT_981727 [Suillus occidentalis]}	{NA}	{NA}	{NA}	{NA}	{NA}	{NA}	{NA}	{NA}	{NA}	{NA}	{NA}
A00743	{Contig10:1837575:1839309:+}	{KAG1769383.1; hypothetical protein EDD22DRAFT_996368 [Suillus occidentalis]}	{NA}	{NA}	{NA}	{NA}	{GO:0016491; oxidoreductase activity; molecular_function GO:0055114; oxidation-reduction process; biological_process}	{NA}	{NA}	{NA}	{NA}	{NA}	{PF02668:Taurine catabolism dioxygenase TauD, TfdA family}
A00744	{Contig10:1841826:1843568:+}	{KAG1780346.1; hypothetical protein EV702DRAFT_774622 [Suillus placidus]}	{NA}	{NA}	{NA}	{NA}	{GO:0005351; sugar:hydrogen symporter activity; molecular_function GO:0016020; membrane; cellular_component GO:0008982; protein-N(PI)-phosphohistidine-sugar phosphotransferase activity; molecular_function GO:0009401; phosphoenolpyruvate-dependent sugar phosphotransferase system; biological_process}	{NA}	{NA}	{NA}	{NA}	{NA}	{PF02378:Phosphotransferase system, EIIC }
A00745	{Contig10:1844310:1848040:+}	{KAG1857205.1; ribosomal protein L3-domain-containing protein [Suillus tomentosus]}	{Q8NKF4; 60S ribosomal protein L3 }	{hir:HETIRDRAFT_439196; K02925 RP-L3e, RPL3 large subunit ribosomal protein L3e -- Genetic Information Processing; Translation; Ribosome [PATH:ko03010]}	{SPAPB8E5.06c; KOG0746 60S ribosomal protein L3 and related proteins J Translation, ribosomal structure and biogenesis ;}	{NA}	{GO:0003735; structural constituent of ribosome; molecular_function GO:0005622; intracellular; cellular_component GO:0006412; translation; biological_process GO:0005840; ribosome; cellular_component}	{NA}	{RL3_YEAST; YOR29-14 AAA88732.1 387 Saccharomyces cerevisiae 559292 SUBUNIT: Component of the large ribosomal subunit. Mature ribosomes consist of a small (40S) and a large (60S) subunit. The 40S subunit contains 32 different proteins (encoded by 56 genes) and 1 molecule of RNA (18S). The 60S subunit contains 46 different proteins (encoded by 81 genes) and 3 molecules of RNA (25S, 5.8S and 5S).; …	{NA}	{NA}	{NA}	{PF00297:Ribosomal protein L3}
A00746	{Contig10:1849764:1851590:+}	{KAG2158992.1; hypothetical protein EDB93DRAFT_1325083 [Suillus bovinus]}	{NA}	{sla:SERLADRAFT_360088; }	{NA}	{NA}	{NA}	{NA}	{NA}	{NA}	{NA}	{NA}	{NA}
A00747	{Contig10:185165:188729:+}	{NA}	{NA}	{NA}	{NA}	{NA}	{GO:0003678; DNA helicase activity; molecular_function GO:0006310; DNA recombination; biological_process GO:0006281; DNA repair; biological_process GO:0005524; ATP binding; molecular_function GO:0009378; four-way junction helicase activity; molecular_function}	{NA}	{NA}	{NA}	{NA}	{NA}	{PF06068:TIP49 P-loop domain PF00004:ATPase family associated with various cellular activities (AAA) PF05496:Holliday junction DNA helicase RuvB P-loop domain}
A00748	{Contig10:1851706:1852550:-}	{KAG2158991.1; alport syndrome [Suillus bovinus]}	{Q6DCA0; AMMECR1-like protein }	{cput:CONPUDRAFT_103743; }	{Hs7669554; KOG3274 Uncharacterized conserved protein, AMMECR1 S Function unknown ;}	{NA}	{NA}	{NA}	{NA}	{NA}	{NA}	{NA}	{NA}
A00749	{Contig10:1852987:1854326:-}	{KAG2158990.1; P-loop containing nucleoside triphosphate hydrolase protein [Suillus bovinus]}	{NA}	{sla:SERLADRAFT_366805; }	{NA}	{NA}	{GO:0007264; small GTPase mediated signal transduction; biological_process GO:0003924; GTPase activity; molecular_function GO:0005622; intracellular; cellular_component GO:0005524; ATP binding; molecular_function GO:0005525; GTP binding; molecular_function GO:0006576; cellular biogenic amine metabolic process; biological_process GO:0005737; cytoplasm; cellular_component GO:0005634; nucleus; cellu…	{PHI:7133; G4N8I6 MoRab5A 318829 Magnaporthe oryzae Rice Blast Oryza sativa (related: rice) Vacuolar protein sorting-associated protein Gene mutation; Altered gene expression/ gene regulation: silencing; gene complementation reduced virulence}	{NA}	{NA}	{NA}	{NA}	{PF00071:Ras family PF10662:Ethanolamine utilisation - propanediol utilisation PF01926:50S ribosome-binding GTPase PF08477:Ras of Complex, Roc, domain of DAPkinase PF00025:ADP-ribosylation factor family PF04670:Gtr1/RagA G protein conserved region PF03193:RsgA GTPase PF00350:Dynamin family}
A00750	{Contig10:1854765:1855463:-}	{KAG2077753.1; ribosomal protein S7e [Suillus decipiens]}	{Q10101; 40S ribosomal protein S7 }	{sla:SERLADRAFT_460384; K02993 RP-S7e, RPS7 small subunit ribosomal protein S7e -- Genetic Information Processing; Translation; Ribosome [PATH:ko03010]}	{SPAC18G6.14c; KOG3320 40S ribosomal protein S7 J Translation, ribosomal structure and biogenesis ;}	{NA}	{GO:0006412; translation; biological_process GO:0005840; ribosome; cellular_component GO:0003735; structural constituent of ribosome; molecular_function GO:0005622; intracellular; cellular_component}	{NA}	{NA}	{NA}	{NA}	{NA}	{PF01251:Ribosomal protein S7e}
A00751	{Contig10:1855773:1857011:-}	{KAG2119072.1; 40S ribosomal protein S7 [Suillus discolor]}	{NA}	{sla:SERLADRAFT_360092; }	{NA}	{NA}	{GO:0005515; protein binding; molecular_function GO:0008318; protein prenyltransferase activity; molecular_function GO:0018342; protein prenylation; biological_process}	{NA}	{NA}	{NA}	{NA}	{NA}	{PF13181:Tetratricopeptide repeat PF13176:Tetratricopeptide repeat PF00515:Tetratricopeptide repeat PF13174:Tetratricopeptide repeat PF01239:Protein prenyltransferase alpha subunit repeat}
A00752	{Contig10:1857166:1858761:+}	{KAG2158988.1; pyridine nucleotide disulfide oxidoreductase-like protein [Suillus bovinus]}	{NA}	{sla:SERLADRAFT_446497; }	{NA}	{NA}	{GO:0050660; flavin adenine dinucleotide binding; molecular_function GO:0016614; oxidoreductase activity, acting on CH-OH group of donors; molecular_function GO:0055114; oxidation-reduction process; biological_process GO:0006813; potassium ion transport; biological_process GO:0016705; oxidoreductase activity, acting on paired donors, with incorporation or reduction of molecular oxygen; molecular_…	{NA}	{NA}	{NA}	{NA}	{NA}	{PF02254:TrkA-N domain PF07992:Pyridine nucleotide-disulphide oxidoreductase PF00070:Pyridine nucleotide-disulphide oxidoreductase PF00732:GMC oxidoreductase PF05834:Lycopene cyclase protein PF01266:FAD dependent oxidoreductase}
A00753	{Contig10:1858803:1859444:-}	{KAG2158987.1; NDUFA12-domain-containing protein [Suillus bovinus]}	{Q6CG53; NADH dehydrogenase [ubiquinone] 1 alpha subcomplex subunit N7BM }	{tvs:TRAVEDRAFT_116985; }	{7295939; KOG3382 NADH:ubiquinone oxidoreductase, B17.2 subunit C Energy production and conversion ;}	{gnl|TC-DB|Q8X0V6; 3.D.1.6.2 Related to nadh-ubiquinone oxidoreductase subunit b17.2 - Neurospora crassa.}	{NA}	{NA}	{NA}	{NA}	{NA}	{NA}	{NA}
A00754	{Contig10:1859838:1861818:-}	{KAG2158986.1; hypothetical protein EDB93DRAFT_1237764 [Suillus bovinus]}	{NA}	{sla:SERLADRAFT_435031; K11237 BEM1 bud emergence protein 1 -- Environmental Information Processing; Signal transduction; MAPK signaling pathway - yeast [PATH:ko04011]}	{NA}	{NA}	{GO:0035091; phosphatidylinositol binding; molecular_function GO:0016021; integral to membrane; cellular_component GO:0005515; protein binding; molecular_function}	{NA}	{NA}	{NA}	{NA}	{NA}	{PF00018:SH3 domain PF00787:PX domain PF09726:Macoilin family}
A00755	{Contig10:1862272:1865091:+}	{KAG2158985.1; Not1 N-terminal domain, CCR4-Not complex component-domain-containing protein [Suillus bovinus]}	{NA}	{cput:CONPUDRAFT_165091; K12580 CNOT3, NOT3 CCR4-NOT transcription complex subunit 3 -- Genetic Information Processing; Folding, sorting and degradation; RNA degradation [PATH:ko03018]}	{NA}	{NA}	{GO:0008017; microtubule binding; molecular_function GO:0006355; regulation of transcription, DNA-dependent; biological_process GO:0005634; nucleus; cellular_component}	{PHI:1440__PHI:5574; NA}	{NA}	{NA}	{NA}	{NA}	{PF04153:NOT2 / NOT3 / NOT5 family PF06657:Centrosome microtubule-binding domain of Cep57 PF04065:Not1 N-terminal domain, CCR4-Not complex component }
A00756	{Contig10:1865513:1866331:-}	{KAG2158984.1; ribosomal protein L7/L12 C-terminal domain-containing protein [Suillus bovinus]}	{P53163; 54S ribosomal protein L12, mitochondrial }	{cput:CONPUDRAFT_153382; K02935 RP-L7, MRPL12, rplL large subunit ribosomal protein L7/L12 -- Genetic Information Processing; Translation; Ribosome [PATH:ko03010]}	{YGL068w; KOG1715 Mitochondrial/chloroplast ribosomal protein L12 J Translation, ribosomal structure and biogenesis ;}	{NA}	{GO:0005622; intracellular; cellular_component GO:0003735; structural constituent of ribosome; molecular_function GO:0006414; translational elongation; biological_process GO:0006412; translation; biological_process GO:0005840; ribosome; cellular_component}	{NA}	{NA}	{NA}	{NA}	{NA}	{PF00428:60s Acidic ribosomal protein PF00542:Ribosomal protein L7/L12 C-terminal domain}
A00757	{Contig10:1867686:1869246:+}	{KAG2051329.1; hypothetical protein BDR06DRAFT_1010495 [Suillus hirtellus]}	{NA}	{sla:SERLADRAFT_413740; }	{NA}	{NA}	{NA}	{NA}	{NA}	{NA}	{NA}	{NA}	{NA}
A00758	{Contig10:188769:189284:+}	{KAG2151043.1; hypothetical protein EDB93DRAFT_1276973 [Suillus bovinus]}	{NA}	{NA}	{NA}	{NA}	{NA}	{NA}	{NA}	{NA}	{NA}	{NA}	{NA}
A00759	{Contig10:1869833:1871910:+}	{KAG2119065.1; cytochrome P450 [Suillus discolor]}	{F1SYH1; Cytochrome P450 monooxygenase 208 }	{cput:CONPUDRAFT_54690; }	{NA}	{NA}	{GO:0020037; heme binding; molecular_function GO:0055114; oxidation-reduction process; biological_process GO:0005506; iron ion binding; molecular_function GO:0016705; oxidoreductase activity, acting on paired donors, with incorporation or reduction of molecular oxygen; molecular_function}	{NA}	{NA}	{e_gw1.5.1517.1; E-classP450,groupI P450_Cp205 http://p450.riceblast.snu.ac.kr/class.php?a=dv_sequence&id=46210&spe_id=29603&ref_id=61898}	{NA}	{QSS55893.1_; GT22 Dol-P-Man: Man6GlcNAc2-PP-Dol alpha-1,2-mannosyltransferase (EC 2.4.1.259); Dol-P-Man: Man8GlcNAc2-PP-Dol alpha-1,2-mannosyltransferase (EC 2.4.1.261); Dol-P-Man: Man2-GlcNAc-phosphatidylinositol alpha-1,2-mannosyltransferase (EC 2.4.1.-); Dol-P-Man: Man3-GlcNAc-phosphatidylinositol alpha-1,2-mannosyltransferase (EC 2.4.1.-) -}	{PF00067:Cytochrome P450}
A00760	{Contig10:1873631:1875692:+}	{KAG2158980.1; cytochrome P450 [Suillus bovinus]}	{F1SYH1; Cytochrome P450 monooxygenase 208 }	{sla:SERLADRAFT_446503; }	{NA}	{NA}	{GO:0016705; oxidoreductase activity, acting on paired donors, with incorporation or reduction of molecular oxygen; molecular_function GO:0005506; iron ion binding; molecular_function GO:0020037; heme binding; molecular_function GO:0055114; oxidation-reduction process; biological_process}	{NA}	{NA}	{estExt_fgenesh1_pm.C_4_t10231; E-classP450,groupI P450_Sl7.9016 http://p450.riceblast.snu.ac.kr/class.php?a=dv_sequence&id=46761&spe_id=393761&ref_id=61913}	{NA}	{QSS55893.1_; GT22 Dol-P-Man: Man6GlcNAc2-PP-Dol alpha-1,2-mannosyltransferase (EC 2.4.1.259); Dol-P-Man: Man8GlcNAc2-PP-Dol alpha-1,2-mannosyltransferase (EC 2.4.1.261); Dol-P-Man: Man2-GlcNAc-phosphatidylinositol alpha-1,2-mannosyltransferase (EC 2.4.1.-); Dol-P-Man: Man3-GlcNAc-phosphatidylinositol alpha-1,2-mannosyltransferase (EC 2.4.1.-) -}	{PF00067:Cytochrome P450}
A00761	{Contig10:1878204:1880260:+}	{KAG2158980.1; cytochrome P450 [Suillus bovinus]}	{F1SYH1; Cytochrome P450 monooxygenase 208 }	{sla:SERLADRAFT_446503; }	{NA}	{NA}	{GO:0020037; heme binding; molecular_function GO:0055114; oxidation-reduction process; biological_process GO:0005506; iron ion binding; molecular_function GO:0016705; oxidoreductase activity, acting on paired donors, with incorporation or reduction of molecular oxygen; molecular_function}	{PHI:2393; I1R980 (O-methylsterigmatocystin oxidoreductase) 5518 Fusarium graminearum Fusarium Head Blight Triticum (related: wheat) no data found gene deletion: full increased virulence (hypervirulence)}	{NA}	{estExt_fgenesh1_pm.C_4_t10231; E-classP450,groupI P450_Sl7.9016 http://p450.riceblast.snu.ac.kr/class.php?a=dv_sequence&id=46761&spe_id=393761&ref_id=61913}	{NA}	{QSS55893.1_; GT22 Dol-P-Man: Man6GlcNAc2-PP-Dol alpha-1,2-mannosyltransferase (EC 2.4.1.259); Dol-P-Man: Man8GlcNAc2-PP-Dol alpha-1,2-mannosyltransferase (EC 2.4.1.261); Dol-P-Man: Man2-GlcNAc-phosphatidylinositol alpha-1,2-mannosyltransferase (EC 2.4.1.-); Dol-P-Man: Man3-GlcNAc-phosphatidylinositol alpha-1,2-mannosyltransferase (EC 2.4.1.-) -}	{PF00067:Cytochrome P450}
A00762	{Contig10:1881943:1884000:+}	{KAG2158979.1; cytochrome P450 [Suillus bovinus]}	{F1SYH1; Cytochrome P450 monooxygenase 208 }	{sla:SERLADRAFT_446503; }	{NA}	{NA}	{GO:0005506; iron ion binding; molecular_function GO:0020037; heme binding; molecular_function GO:0055114; oxidation-reduction process; biological_process GO:0016705; oxidoreductase activity, acting on paired donors, with incorporation or reduction of molecular oxygen; molecular_function}	{NA}	{NA}	{estExt_fgenesh1_pm.C_4_t10231; E-classP450,groupI P450_Sl7.9016 http://p450.riceblast.snu.ac.kr/class.php?a=dv_sequence&id=46761&spe_id=393761&ref_id=61913}	{NA}	{QSS55893.1_; GT22 Dol-P-Man: Man6GlcNAc2-PP-Dol alpha-1,2-mannosyltransferase (EC 2.4.1.259); Dol-P-Man: Man8GlcNAc2-PP-Dol alpha-1,2-mannosyltransferase (EC 2.4.1.261); Dol-P-Man: Man2-GlcNAc-phosphatidylinositol alpha-1,2-mannosyltransferase (EC 2.4.1.-); Dol-P-Man: Man3-GlcNAc-phosphatidylinositol alpha-1,2-mannosyltransferase (EC 2.4.1.-) -}	{PF00067:Cytochrome P450}
A00763	{Contig10:1885187:1885853:-}	{KAG2119057.1; hypothetical protein F5147DRAFT_626511 [Suillus discolor]}	{NA}	{tvs:TRAVEDRAFT_163386; }	{NA}	{NA}	{NA}	{NA}	{NA}	{NA}	{NA}	{NA}	{NA}
A00764	{Contig10:1886065:1887282:+}	{KAG2158977.1; Uroporphyrinogen decarboxylase [Suillus bovinus]}	{Q9USJ5; Uroporphyrinogen decarboxylase }	{sla:SERLADRAFT_360097; K01599 hemE, UROD uroporphyrinogen decarboxylase 4.1.1.37 Metabolism; Metabolism of cofactors and vitamins; Porphyrin and chlorophyll metabolism [PATH:ko00860] Metabolism; Global and overview maps; Metabolic pathways [PATH:ko01100] Metabolism; Global and overview maps; Biosynthesis of secondary metabolites [PATH:ko01110]}	{SPCC4B3.05c; KOG2872 Uroporphyrinogen decarboxylase H Coenzyme transport and metabolism ;}	{NA}	{GO:0004853; uroporphyrinogen decarboxylase activity; molecular_function GO:0006779; porphyrin biosynthetic process; biological_process}	{NA}	{NA}	{NA}	{NA}	{NA}	{PF01208:Uroporphyrinogen decarboxylase (URO-D)}
A00765	{Contig10:1887639:1889636:-}	{KAG2158976.1; tyrosine protein phosphatase [Suillus bovinus]}	{Q9P7H1; Tyrosine-protein phosphatase CDC14 homolog }	{mrr:Moror_1455; K06639 CDC14 cell division cycle 14 3.1.3.16 3.1.3.48 Cellular Processes; Cell growth and death; Cell cycle [PATH:ko04110] Cellular Processes; Cell growth and death; Cell cycle - yeast [PATH:ko04111] Cellular Processes; Cell growth and death; Meiosis - yeast [PATH:ko04113]}	{SPAC1782.09c; KOG1720 Protein tyrosine phosphatase CDC14 V Defense mechanisms ;}	{NA}	{GO:0008138; protein tyrosine/serine/threonine phosphatase activity; molecular_function GO:0004725; protein tyrosine phosphatase activity; molecular_function GO:0006470; protein dephosphorylation; biological_process}	{NA}	{NA}	{NA}	{NA}	{NA}	{PF00782:Dual specificity phosphatase, catalytic domain PF00102:Protein-tyrosine phosphatase}
A00766	{Contig10:1890959:1893246:+}	{KAG2158975.1; apses-domain-containing protein [Suillus bovinus]}	{NA}	{cput:CONPUDRAFT_165096; }	{NA}	{NA}	{GO:0006888; ER to Golgi vesicle-mediated transport; biological_process GO:0006886; intracellular protein transport; biological_process GO:0005515; protein binding; molecular_function GO:0030127; COPII vesicle coat; cellular_component GO:0030155; regulation of cell adhesion; biological_process GO:0030334; regulation of cell migration; biological_process GO:0005102; receptor binding; molecular_fun…	{NA}	{NA}	{NA}	{NA}	{NA}	{PF04811:Sec23/Sec24 trunk domain PF13606:Ankyrin repeat PF00023:Ankyrin repeat PF06008:Laminin Domain I}
A00767	{Contig10:1893711:1894977:+}	{KAG2158974.1; hypothetical protein EDB93DRAFT_434938 [Suillus bovinus]}	{NA}	{sla:SERLADRAFT_460409; }	{NA}	{NA}	{NA}	{NA}	{NA}	{NA}	{NA}	{NA}	{NA}
A00768	{Contig10:1896140:1897731:+}	{KAG2158973.1; nucleoside transporter-domain-containing protein [Suillus bovinus]}	{NA}	{sla:SERLADRAFT_460421; K15014 SLC29A1_2_3, ENT1_2_3 solute carrier family 29 (equilibrative nucleoside transporter), member 1/2/3 -- }	{NA}	{NA}	{GO:0006810; transport; biological_process GO:0005337; nucleoside transmembrane transporter activity; molecular_function GO:0016021; integral to membrane; cellular_component}	{NA}	{NA}	{NA}	{NA}	{NA}	{PF01733:Nucleoside transporter}
A00769	{Contig10:191437:192664:+}	{KAG2128341.1; hypothetical protein EDB93DRAFT_1243572 [Suillus bovinus]}	{NA}	{lbc:LACBIDRAFT_314794; }	{NA}	{NA}	{NA}	{NA}	{NA}	{NA}	{NA}	{NA}	{NA}
A00770	{Contig10:1898176:1900015:+}	{KAG2158972.1; nucleoside transporter-domain-containing protein [Suillus bovinus]}	{NA}	{sla:SERLADRAFT_460421; K15014 SLC29A1_2_3, ENT1_2_3 solute carrier family 29 (equilibrative nucleoside transporter), member 1/2/3 -- }	{NA}	{NA}	{GO:0006810; transport; biological_process GO:0005337; nucleoside transmembrane transporter activity; molecular_function GO:0016021; integral to membrane; cellular_component}	{NA}	{NA}	{NA}	{NA}	{NA}	{PF01733:Nucleoside transporter}
A00771	{Contig10:1900097:1900672:-}	{KAG1773906.1; DUF1742-domain-containing protein [Suillus occidentalis]}	{NA}	{cput:CONPUDRAFT_123547; }	{NA}	{NA}	{GO:0006270; DNA-dependent DNA replication initiation; biological_process}	{NA}	{NA}	{NA}	{NA}	{NA}	{PF02724:CDC45-like protein}
A00772	{Contig10:1900980:1902760:+}	{KAG2339825.1; formaldehyde dehydrogenase [Suillus weaverae]}	{Q06099; S-(hydroxymethyl)glutathione dehydrogenase }	{sla:SERLADRAFT_354673; K00121 frmA, ADH5, adhC S-(hydroxymethyl)glutathione dehydrogenase / alcohol dehydrogenase 1.1.1.284 1.1.1.1 Metabolism; Carbohydrate metabolism; Glycolysis / Gluconeogenesis [PATH:ko00010] Metabolism; Lipid metabolism; Fatty acid degradation [PATH:ko00071] Metabolism; Amino acid metabolism; Tyrosine metabolism [PATH:ko00350] Metabolism; Xenobiotics biodegradation and meta…	{SPCC13B11.04c; KOG0022 Alcohol dehydrogenase, class III Q Secondary metabolites biosynthesis, transport and catabolism ;}	{NA}	{GO:0016616; oxidoreductase activity, acting on the CH-OH group of donors, NAD or NADP as acceptor; molecular_function GO:0006813; potassium ion transport; biological_process GO:0051287; NAD binding; molecular_function GO:0016491; oxidoreductase activity; molecular_function GO:0008270; zinc ion binding; molecular_function GO:0048037; cofactor binding; molecular_function GO:0055114; oxidation-redu…	{PHI:668; Q6XVN4 GNO1 5207 Cryptococcus neoformans Cryptococcosis Mus musculus (related: house mouse) GSNO reductase gene disruption reduced virulence}	{Q6XVN4_CRYNV; GNO1 AAP41027.1 383 Cryptococcus neoformans 178876 COFACTOR: Zinc (By similarity). 14614821 Unknown {ID:PF08240; Description: ADH_N} {ID:PF00107; Description: ADH_N} humans vertebrata cryptococcosis Cryptococcosis {ID:0051903; Method: IEA:InterPro; Description: F:S-(hydroxymethyl)glutathione dehydrogenase activity} {ID:0008270; Method: IEA:InterPro; Description: F:zinc ion binding}…	{NA}	{NA}	{NA}	{PF03721:UDP-glucose/GDP-mannose dehydrogenase family, NAD binding domain PF02254:TrkA-N domain PF00107:Zinc-binding dehydrogenase PF08240:Alcohol dehydrogenase GroES-like domain PF02826:D-isomer specific 2-hydroxyacid dehydrogenase, NAD binding domain}
A00773	{Contig10:1902955:1904573:-}	{KAG2158969.1; ACBP-domain-containing protein [Suillus bovinus]}	{NA}	{mrr:Moror_1407; }	{NA}	{NA}	{GO:0000062; fatty-acyl-CoA binding; molecular_function GO:0030117; membrane coat; cellular_component GO:0006886; intracellular protein transport; biological_process GO:0016192; vesicle-mediated transport; biological_process}	{NA}	{NA}	{NA}	{NA}	{NA}	{PF01602:Adaptin N terminal region PF00887:Acyl CoA binding protein}
A00774	{Contig10:1905407:1905776:-}	{KAG2158968.1; hypothetical protein EDB93DRAFT_1325060 [Suillus bovinus]}	{NA}	{sla:SERLADRAFT_460438; K17412 MRPS34 small subunit ribosomal protein S34 -- }	{NA}	{NA}	{NA}	{NA}	{NA}	{NA}	{NA}	{NA}	{NA}
A00775	{Contig10:1905871:1906353:+}	{KAG2158967.1; hypothetical protein EDB93DRAFT_434533 [Suillus bovinus]}	{NA}	{sla:SERLADRAFT_381833; }	{NA}	{NA}	{GO:0006450; regulation of translational fidelity; biological_process}	{NA}	{NA}	{NA}	{NA}	{NA}	{PF02686:Glu-tRNAGln amidotransferase C subunit}
A00776	{Contig10:1906609:1907295:-}	{KAG2158966.1; dUTPase-like protein [Suillus bovinus]}	{Q6MVL2; Deoxyuridine 5'-triphosphate nucleotidohydrolase }	{sla:SERLADRAFT_435048; K01520 dut, DUT dUTP pyrophosphatase 3.6.1.23 Metabolism; Nucleotide metabolism; Pyrimidine metabolism [PATH:ko00240] Metabolism; Xenobiotics biodegradation and metabolism; Drug metabolism - other enzymes [PATH:ko00983] Metabolism; Global and overview maps; Metabolic pathways [PATH:ko01100]}	{At3g46940; KOG3370 dUTPase F Nucleotide transport and metabolism ;}	{NA}	{GO:0016787; hydrolase activity; molecular_function GO:0046080; dUTP metabolic process; biological_process}	{NA}	{NA}	{NA}	{NA}	{NA}	{PF00692:dUTPase}
A00777	{Contig10:1907351:1909401:+}	{KAG2339831.1; hypothetical protein BDR05DRAFT_967440 [Suillus weaverae]}	{NA}	{NA}	{NA}	{NA}	{GO:0016020; membrane; cellular_component}	{NA}	{NA}	{NA}	{NA}	{NA}	{PF05887:Procyclic acidic repetitive protein (PARP)}
A00778	{Contig10:1909547:1911333:-}	{KAG2158965.1; general substrate transporter [Suillus bovinus]}	{NA}	{cput:CONPUDRAFT_54031; }	{NA}	{NA}	{GO:0022857; transmembrane transporter activity; molecular_function GO:0016021; integral to membrane; cellular_component GO:0055085; transmembrane transport; biological_process}	{NA}	{NA}	{NA}	{NA}	{NA}	{PF00083:Sugar (and other) transporter PF07690:Major Facilitator Superfamily}
A00779	{Contig10:1921526:1922336:-}	{KAG1745492.1; hypothetical protein EDB91DRAFT_1246365 [Suillus paluster]}	{NA}	{NA}	{NA}	{NA}	{NA}	{NA}	{NA}	{NA}	{NA}	{NA}	{NA}
A00780	{Contig10:194294:200274:-}	{KAG2127583.1; hypothetical protein EDB93DRAFT_1256978 [Suillus bovinus]}	{NA}	{NA}	{NA}	{NA}	{NA}	{NA}	{NA}	{NA}	{NA}	{NA}	{NA}
A00781	{Contig10:1938430:1939236:-}	{OJA18938.1; hypothetical protein AZE42_13572, partial [Rhizopogon vesiculosus]}	{NA}	{tvs:TRAVEDRAFT_107333; }	{NA}	{NA}	{NA}	{NA}	{NA}	{NA}	{NA}	{NA}	{NA}
A00782	{Contig10:1945317:1945934:-}	{KAG2158961.1; hypothetical protein EDB93DRAFT_1245517 [Suillus bovinus]}	{NA}	{NA}	{NA}	{NA}	{NA}	{NA}	{NA}	{NA}	{NA}	{NA}	{NA}
A00783	{Contig10:1953376:1953861:-}	{KAG2056603.1; hypothetical protein BDR06DRAFT_981317 [Suillus hirtellus]}	{NA}	{mpr:MPER_03592; }	{NA}	{NA}	{NA}	{NA}	{NA}	{NA}	{NA}	{NA}	{NA}
A00784	{Contig10:1954993:1956315:-}	{KIM52051.1; hypothetical protein SCLCIDRAFT_32955 [Scleroderma citrinum Foug A]}	{NA}	{mpr:MPER_12841; }	{NA}	{NA}	{NA}	{NA}	{NA}	{NA}	{NA}	{NA}	{NA}
A00785	{Contig10:1961777:1963126:+}	{KAG2158956.1; hypothetical protein EDB93DRAFT_434287 [Suillus bovinus]}	{NA}	{sla:SERLADRAFT_460446; }	{NA}	{NA}	{GO:0055114; oxidation-reduction process; biological_process GO:0006631; fatty acid metabolic process; biological_process GO:0016491; oxidoreductase activity; molecular_function GO:0008152; NA GO:0003857; 3-hydroxyacyl-CoA dehydrogenase activity; molecular_function}	{NA}	{NA}	{NA}	{NA}	{NA}	{PF02737:3-hydroxyacyl-CoA dehydrogenase, NAD binding domain PF00106:short chain dehydrogenase}
A00786	{Contig10:1963370:1964199:-}	{KAG2158955.1; hypothetical protein EDB93DRAFT_434361 [Suillus bovinus]}	{NA}	{cput:CONPUDRAFT_165104; }	{NA}	{NA}	{NA}	{NA}	{NA}	{NA}	{NA}	{NA}	{NA}
A00787	{Contig10:1964585:1965456:+}	{KAG2158954.1; Longin-like domain-containing protein [Suillus bovinus]}	{Q9Y7L0; Protein transport protein sec22 }	{sla:SERLADRAFT_460483; K08517 SEC22 vesicle transport protein SEC22 -- Genetic Information Processing; Folding, sorting and degradation; SNARE interactions in vesicular transport [PATH:ko04130] Cellular Processes; Transport and catabolism; Phagosome [PATH:ko04145] Human Diseases; Infectious diseases: Bacterial; Legionellosis [PATH:ko05134]}	{SPBC2A9.08c; KOG0862 Synaptobrevin/VAMP-like protein SEC22 U Intracellular trafficking, secretion, and vesicular transport ;}	{NA}	{GO:0016192; vesicle-mediated transport; biological_process GO:0016021; integral to membrane; cellular_component}	{PHI:7873; G2XE04 VdSec22 27337 Verticillium dahliae vascular wilt Gossypium hirsutum (related: cotton) Transport protein Gene deletion: full; gene complementation reduced virulence}	{NA}	{NA}	{NA}	{NA}	{PF00957:Synaptobrevin}
A00788	{Contig10:1968172:1970609:+}	{KAG2158953.1; hypothetical protein EDB93DRAFT_1076125 [Suillus bovinus]}	{NA}	{cput:CONPUDRAFT_153398; }	{NA}	{NA}	{GO:0006351; transcription, DNA-dependent; biological_process GO:0003899; DNA-directed RNA polymerase activity; molecular_function GO:0003677; DNA binding; molecular_function}	{NA}	{NA}	{NA}	{NA}	{NA}	{PF04997:RNA polymerase Rpb1, domain 1}
A00789	{Contig10:1971337:1972776:+}	{KAG2158952.1; heterokaryon incompatibility protein-domain-containing protein [Suillus bovinus]}	{NA}	{cput:CONPUDRAFT_152641; }	{NA}	{NA}	{NA}	{NA}	{NA}	{NA}	{NA}	{NA}	{NA}
A00790	{Contig10:1973315:1974980:+}	{KAG2158951.1; hypothetical protein EDB93DRAFT_1117218 [Suillus bovinus]}	{NA}	{NA}	{NA}	{NA}	{NA}	{NA}	{NA}	{NA}	{NA}	{NA}	{NA}
A00791	{Contig10:27934:28290:+}	{KAG2058382.1; HET-domain-containing protein, partial [Suillus hirtellus]}	{NA}	{cput:CONPUDRAFT_17151; }	{NA}	{NA}	{NA}	{NA}	{NA}	{NA}	{NA}	{NA}	{NA}
A00792	{Contig10:200456:203474:+}	{KAG2127579.1; hypothetical protein EDB93DRAFT_1256976 [Suillus bovinus]}	{NA}	{NA}	{NA}	{NA}	{NA}	{NA}	{NA}	{NA}	{NA}	{NA}	{NA}
A00793	{Contig10:1975451:1979676:-}	{KAG1907485.1; exoribonuclease 2 [Suillus fuscotomentosus]}	{Q4P149; 5'-3' exoribonuclease 2 }	{dsq:DICSQDRAFT_83606; K12619 XRN2, RAT1 5'-3' exoribonuclease 2 3.1.13.- Genetic Information Processing; Translation; Ribosome biogenesis in eukaryotes [PATH:ko03008] Genetic Information Processing; Folding, sorting and degradation; RNA degradation [PATH:ko03018]}	{SPAC26A3.12c; KOG2044 5'-3' exonuclease HKE1/RAT1 LA Replication, recombination and repair ; RNA processing and modification ;}	{NA}	{GO:0005622; intracellular; cellular_component GO:0004527; exonuclease activity; molecular_function GO:0008270; zinc ion binding; molecular_function GO:0003676; nucleic acid binding; molecular_function}	{PHI:3330; P0CL88 Xrn1p 5207 Cryptococcus neoformans Fungal Meningitis Galleria mellonella (related: greater wax moth) cytoplasmic exonuclease gene disruption reduced virulence}	{NA}	{NA}	{NA}	{NA}	{PF03159:XRN 5'-3' exonuclease N-terminus PF00098:Zinc knuckle}
A00794	{Contig10:1979878:1981542:+}	{KAG2158949.1; hypothetical protein EDB93DRAFT_1283252 [Suillus bovinus]}	{Q09924; Probable translation initiation factor eIF-2B subunit delta }	{sla:SERLADRAFT_460463; K03680 EIF2B4 translation initiation factor eIF-2B subunit delta -- Genetic Information Processing; Translation; RNA transport [PATH:ko03013]}	{SPAC21E11.06; KOG1467 Translation initiation factor 2B, delta subunit (eIF-2Bdelta/GCD2) J Translation, ribosomal structure and biogenesis ;}	{NA}	{GO:0044237; cellular metabolic process; biological_process GO:0016021; integral to membrane; cellular_component GO:0004190; aspartic-type endopeptidase activity; molecular_function}	{NA}	{NA}	{NA}	{NA}	{NA}	{PF01008:Initiation factor 2 subunit family PF01080:Presenilin}
A00795	{Contig10:1981958:1982737:-}	{KAG1907483.1; mitochondrial 18 KDa protein-domain-containing protein [Suillus fuscotomentosus]}	{NA}	{sla:SERLADRAFT_460458; K17981 MTFP1, MTP18 mitochondrial fission process protein 1 -- }	{NA}	{NA}	{NA}	{PHI:888; G4MUW5 MGG_01707 318829 Magnaporthe oryzae Rice Blast Oryza sativa (related: rice) Hypothetical protein gene disruption reduced virulence}	{A4RJV7_MAGO7; MGG_01707 EDK04578.1 296 Magnaporthe oryzae 242507 Unknown 15846337 XP_363781.1, XM_363781.1 {ID:PF10558; Description: MTP18} Poaceae, especially important on Oryzae herb Rice blast Rice Blast {ID:0004089; Method: IEA:InterPro; Description: F:carbonate dehydratase activity} {ID:0008270; Method: IEA:InterPro; Description: F:zinc ion binding} {ID:0015976; Method: IEA:InterPro; Descri…	{NA}	{NA}	{NA}	{NA}
A00796	{Contig10:1982885:1984953:+}	{KAG2158947.1; hypothetical protein EDB93DRAFT_1075984 [Suillus bovinus]}	{NA}	{cput:CONPUDRAFT_165109; }	{NA}	{NA}	{GO:0003700; sequence-specific DNA binding transcription factor activity; molecular_function GO:0043565; sequence-specific DNA binding; molecular_function GO:0006355; regulation of transcription, DNA-dependent; biological_process GO:0005515; protein binding; molecular_function}	{NA}	{NA}	{NA}	{NA}	{NA}	{PF00250:Forkhead domain PF00498:FHA domain}
A00797	{Contig10:1985492:1987205:-}	{KAG2158946.1; hypothetical protein EDB93DRAFT_1117175 [Suillus bovinus]}	{NA}	{NA}	{NA}	{NA}	{NA}	{NA}	{NA}	{NA}	{NA}	{NA}	{NA}
A00798	{Contig10:1989435:1991775:+}	{KAG2158945.1; SAICAR synthase-like protein [Suillus bovinus]}	{NA}	{sla:SERLADRAFT_366843; K07756 IP6K, IHPK inositol-hexakisphosphate 5-kinase 2.7.4.21 Environmental Information Processing; Signal transduction; Phosphatidylinositol signaling system [PATH:ko04070] Cellular Processes; Transport and catabolism; Autophagy - yeast [PATH:ko04138]}	{NA}	{NA}	{GO:0003700; sequence-specific DNA binding transcription factor activity; molecular_function GO:0008440; inositol trisphosphate 3-kinase activity; molecular_function GO:0006355; regulation of transcription, DNA-dependent; biological_process}	{NA}	{NA}	{NA}	{NA}	{NA}	{PF03770:Inositol polyphosphate kinase PF02045:CCAAT-binding transcription factor (CBF-B/NF-YA) subunit B}
A00799	{Contig10:1992922:1993578:+}	{KAG1892766.1; hypothetical protein F4604DRAFT_51924 [Suillus subluteus]}	{NA}	{gtr:GLOTRDRAFT_98534; K02948 RP-S11, MRPS11, rpsK small subunit ribosomal protein S11 -- Genetic Information Processing; Translation; Ribosome [PATH:ko03010]}	{NA}	{NA}	{GO:0003735; structural constituent of ribosome; molecular_function GO:0006412; translation; biological_process GO:0005840; ribosome; cellular_component}	{NA}	{NA}	{NA}	{NA}	{NA}	{PF00411:Ribosomal protein S11}
A00800	{Contig10:1993913:1994720:-}	{KAG2158942.1; riboflavin kinase [Suillus bovinus]}	{O74866; Riboflavin kinase }	{cput:CONPUDRAFT_82005; K00861 RFK, FMN1 riboflavin kinase 2.7.1.26 Metabolism; Metabolism of cofactors and vitamins; Riboflavin metabolism [PATH:ko00740] Metabolism; Global and overview maps; Metabolic pathways [PATH:ko01100] Metabolism; Global and overview maps; Biosynthesis of secondary metabolites [PATH:ko01110]}	{SPCC18.16c; KOG3110 Riboflavin kinase H Coenzyme transport and metabolism ;}	{NA}	{GO:0009231; riboflavin biosynthetic process; biological_process GO:0008531; riboflavin kinase activity; molecular_function}	{NA}	{NA}	{NA}	{YES}	{NA}	{PF01687:Riboflavin kinase}
A00801	{Contig10:1994900:1997672:+}	{KAG2152879.1; hypothetical protein DEU56DRAFT_752160 [Suillus clintonianus]}	{NA}	{NA}	{NA}	{NA}	{NA}	{NA}	{NA}	{NA}	{NA}	{NA}	{NA}
A00802	{Contig10:1998073:2000395:-}	{KAG2043136.1; hypothetical protein BDR03DRAFT_942953 [Suillus americanus]}	{NA}	{sla:SERLADRAFT_413763; }	{NA}	{NA}	{GO:0005524; ATP binding; molecular_function GO:0003682; chromatin binding; molecular_function GO:0006338; chromatin remodeling; biological_process GO:0005634; nucleus; cellular_component GO:0016818; hydrolase activity, acting on acid anhydrides, in phosphorus-containing anhydrides; molecular_function GO:0003676; nucleic acid binding; molecular_function}	{NA}	{NA}	{NA}	{NA}	{NA}	{PF09111:SLIDE PF00249:Myb-like DNA-binding domain}
A00803	{Contig10:205010:205683:+}	{NA}	{NA}	{NA}	{NA}	{NA}	{GO:0005524; ATP binding; molecular_function GO:0016787; hydrolase activity; molecular_function}	{NA}	{NA}	{NA}	{NA}	{NA}	{PF13361:UvrD-like helicase C-terminal domain}
A00804	{Contig10:2000506:2003583:+}	{KAG1892760.1; hypothetical protein F4604DRAFT_1701465 [Suillus subluteus]}	{NA}	{NA}	{NA}	{NA}	{NA}	{NA}	{NA}	{NA}	{NA}	{NA}	{NA}
A00805	{Contig10:2003665:2004359:-}	{KAG2158936.1; Alpha/Beta hydrolase protein [Suillus bovinus]}	{NA}	{NA}	{NA}	{NA}	{GO:0016787; hydrolase activity; molecular_function}	{NA}	{NA}	{NA}	{NA}	{NA}	{PF06821:Serine hydrolase}
A00806	{Contig10:2005499:2007860:-}	{KAG1874708.1; Alpha/Beta hydrolase protein [Suillus subalutaceus]}	{NA}	{NA}	{NA}	{NA}	{GO:0015996; chlorophyll catabolic process; biological_process GO:0006505; GPI anchor metabolic process; biological_process GO:0016787; hydrolase activity; molecular_function GO:0047746; chlorophyllase activity; molecular_function GO:0016788; hydrolase activity, acting on ester bonds; molecular_function GO:0006886; intracellular protein transport; biological_process}	{NA}	{NA}	{NA}	{NA}	{NA}	{PF12740:Chlorophyllase enzyme PF06821:Serine hydrolase PF07819:PGAP1-like protein}
A00807	{Contig10:2009191:2011016:-}	{KAG2158934.1; MT-A70-domain-containing protein [Suillus bovinus]}	{Q86U44; N6-adenosine-methyltransferase catalytic subunit }	{hir:HETIRDRAFT_181243; K05925 METTL3_14 mRNA m6A methyltransferase 2.1.1.348 }	{Hs21361827; KOG2098 Predicted N6-adenine RNA methylase A RNA processing and modification ;}	{NA}	{GO:0006139; nucleobase, nucleoside, nucleotide and nucleic acid metabolic process; biological_process GO:0008168; methyltransferase activity; molecular_function}	{NA}	{NA}	{NA}	{YES}	{NA}	{PF05063:MT-A70 }
A00808	{Contig10:2012125:2012980:+}	{KAG2158933.1; Alpha/Beta hydrolase protein [Suillus bovinus]}	{NA}	{cput:CONPUDRAFT_90767; }	{NA}	{NA}	{GO:0015996; chlorophyll catabolic process; biological_process GO:0006505; GPI anchor metabolic process; biological_process GO:0016788; hydrolase activity, acting on ester bonds; molecular_function GO:0006886; intracellular protein transport; biological_process GO:0047746; chlorophyllase activity; molecular_function}	{NA}	{NA}	{NA}	{NA}	{NA}	{PF07819:PGAP1-like protein PF07224:Chlorophyllase PF12740:Chlorophyllase enzyme}
A00809	{Contig10:2014355:2015920:+}	{KAG2158932.1; Alpha/Beta hydrolase protein [Suillus bovinus]}	{NA}	{NA}	{NA}	{NA}	{GO:0016788; hydrolase activity, acting on ester bonds; molecular_function GO:0047746; chlorophyllase activity; molecular_function GO:0006886; intracellular protein transport; biological_process GO:0006505; GPI anchor metabolic process; biological_process GO:0006629; lipid metabolic process; biological_process GO:0015996; chlorophyll catabolic process; biological_process}	{NA}	{NA}	{NA}	{NA}	{NA}	{PF12740:Chlorophyllase enzyme PF04083:Partial alpha/beta-hydrolase lipase region PF07224:Chlorophyllase PF07819:PGAP1-like protein}
A00810	{Contig10:2017236:2017976:-}	{KAG2133539.1; CHAT domain-containing protein [Suillus bovinus]}	{NA}	{NA}	{NA}	{NA}	{NA}	{NA}	{NA}	{NA}	{NA}	{NA}	{NA}
A00811	{Contig10:2018174:2018647:-}	{NA}	{NA}	{NA}	{NA}	{NA}	{NA}	{NA}	{NA}	{NA}	{NA}	{NA}	{NA}
A00812	{Contig10:2018780:2021071:-}	{KAG1795999.1; hypothetical protein HD556DRAFT_1535572 [Suillus plorans]}	{NA}	{NA}	{NA}	{NA}	{GO:0005515; protein binding; molecular_function}	{NA}	{NA}	{NA}	{NA}	{NA}	{PF13176:Tetratricopeptide repeat}
A00813	{Contig10:2026550:2027408:+}	{KAG2158930.1; WD40-repeat-containing domain protein [Suillus bovinus]}	{NA}	{NA}	{NA}	{NA}	{GO:0005515; protein binding; molecular_function}	{NA}	{NA}	{NA}	{NA}	{NA}	{PF00400:WD domain, G-beta repeat}
A00814	{Contig10:208681:213384:+}	{KAG2127581.1; hypothetical protein EDB93DRAFT_1096448 [Suillus bovinus]}	{NA}	{NA}	{NA}	{NA}	{GO:0006468; protein phosphorylation; biological_process GO:0009103; lipopolysaccharide biosynthetic process; biological_process GO:0005524; ATP binding; molecular_function GO:0016773; phosphotransferase activity, alcohol group as acceptor; molecular_function GO:0046983; protein dimerization activity; molecular_function GO:0003824; NA GO:0004672; protein kinase activity; molecular_function GO:001…	{NA}	{NA}	{NA}	{NA}	{NA}	{PF01163:RIO1 family PF05699:hAT family C-terminal dimerisation region PF00069:Protein kinase domain PF06293:Lipopolysaccharide kinase (Kdo/WaaP) family}
A00815	{Contig10:2029950:2034186:-}	{KAG2158929.1; glycoside hydrolase family 35 protein [Suillus bovinus]}	{NA}	{sla:SERLADRAFT_453704; }	{NA}	{NA}	{GO:0005975; carbohydrate metabolic process; biological_process GO:0003824; NA GO:0004553; hydrolase activity, hydrolyzing O-glycosyl compounds; molecular_function GO:0008152; NA}	{NA}	{NA}	{NA}	{NA}	{QRW27580.1_; GH35 beta-galactosidase (EC 3.2.1.23); exo-beta-glucosaminidase (EC 3.2.1.165); exo-beta-1,4-galactanase (EC 3.2.1.-); beta-1,3-galactosidase (EC 3.2.1.-) -}	{PF01301:Glycosyl hydrolases family 35 PF04909:Amidohydrolase}
A00816	{Contig10:2034620:2036257:-}	{KAG2158928.1; Alpha/Beta hydrolase protein [Suillus bovinus]}	{NA}	{sla:SERLADRAFT_460525; K13535 CLD1 cardiolipin-specific phospholipase 3.1.1.- Metabolism; Lipid metabolism; Glycerophospholipid metabolism [PATH:ko00564]}	{NA}	{NA}	{GO:0008152; NA GO:0006464; protein modification process; biological_process GO:0008474; palmitoyl-(protein) hydrolase activity; molecular_function GO:0016787; hydrolase activity; molecular_function}	{NA}	{NA}	{NA}	{NA}	{NA}	{PF07859:alpha/beta hydrolase fold PF06821:Serine hydrolase PF02089:Palmitoyl protein thioesterase}
A00817	{Contig10:2036503:2037753:+}	{KAG2158927.1; cwf21 domain-containing protein [Suillus bovinus]}	{P0CM95; Pre-mRNA-splicing factor CWC21 }	{ppl:POSPLDRAFT_36731; }	{NA}	{NA}	{NA}	{NA}	{NA}	{NA}	{NA}	{NA}	{NA}
A00818	{Contig10:2038054:2042723:+}	{OJA09923.1; hypothetical protein AZE42_04884 [Rhizopogon vesiculosus]}	{Q92403; 5-aminolevulinate synthase, mitochondrial }	{sla:SERLADRAFT_435088; K00643 E2.3.1.37, ALAS 5-aminolevulinate synthase 2.3.1.37 Metabolism; Amino acid metabolism; Glycine, serine and threonine metabolism [PATH:ko00260] Metabolism; Metabolism of cofactors and vitamins; Porphyrin and chlorophyll metabolism [PATH:ko00860] Metabolism; Global and overview maps; Metabolic pathways [PATH:ko01100] Metabolism; Global and overview maps; Biosynthesis …	{NA}	{NA}	{GO:0009058; biosynthetic process; biological_process GO:0008483; transaminase activity; molecular_function GO:0030170; pyridoxal phosphate binding; molecular_function GO:0005739; mitochondrion; cellular_component GO:0008152; NA GO:0005524; ATP binding; molecular_function GO:0000156; two-component response regulator activity; molecular_function GO:0004408; holocytochrome-c synthase activity; mole…	{PHI:595__PHI:2248; NA}	{Q1L2E2_PHAND; ALS1 AAZ95011.1 619 Phaeosphaeria nodorum 13684 COFACTOR: Pyridoxal phosphate (By similarity).; SIMILARITY: Belongs to the class-II pyridoxal-phosphate-dependent aminotransferase family. 16622070 Unknown {ID:PF00155; Description: Aminotran_1_2} Multiple genera of Poaceae and Blysmus compressus (Cyperaceae) herb Glume blotch of wheat and other grasses Glume Blotch {ID:0003870; Metho…	{NA}	{NA}	{NA}	{PF06506:Propionate catabolism activator PF01053:Cys/Met metabolism PLP-dependent enzyme PF00202:Aminotransferase class-III PF01265:Cytochrome c/c1 heme lyase PF00266:Aminotransferase class-V PF00155:Aminotransferase class I and II}
A00819	{Contig10:2042893:2044032:-}	{KAG2158924.1; hypothetical protein EDB93DRAFT_1076104 [Suillus bovinus]}	{NA}	{NA}	{NA}	{NA}	{NA}	{NA}	{NA}	{NA}	{NA}	{NA}	{NA}
A00820	{Contig10:2044222:2045098:+}	{KAG0705405.1; small monomeric GTPase [Suillus brevipes Sb2|Suillus cothurnatus|Suillus clintonianus|Suillus decipiens|Suillus ampliporus|Suillus spraguei|Suillus bovinus|Suillus lakei]}	{P40940; ADP-ribosylation factor 3 }	{sla:SERLADRAFT_460534; K07942 ARL1 ADP-ribosylation factor-like protein 1 -- }	{YBR164c; KOG0072 GTP-binding ADP-ribosylation factor-like protein ARL1 U Intracellular trafficking, secretion, and vesicular transport ;}	{gnl|TC-DB|P38116; 3.A.30.1.1 ADP-ribosylation factor-like protein 1 OS=Saccharomyces cerevisiae (strain ATCC 204508 / S288c) OX=559292 GN=ARL1 PE=1 SV=4}	{GO:0007186; G-protein coupled receptor protein signaling pathway; biological_process GO:0004871; signal transducer activity; molecular_function GO:0007264; small GTPase mediated signal transduction; biological_process GO:0019001; guanyl nucleotide binding; molecular_function GO:0005525; GTP binding; molecular_function GO:0005737; cytoplasm; cellular_component GO:0005634; nucleus; cellular_compon…	{PHI:9548; G4N3J3 Moarl1 318829 Magnaporthe oryzae Rice Blast Hordeum vulgare (related: barley) ADP-ribosylation factor-like protein 1 gene deletion: full; gene complementation reduced virulence}	{NA}	{NA}	{NA}	{NA}	{PF04670:Gtr1/RagA G protein conserved region PF01926:50S ribosome-binding GTPase PF06858:Nucleolar GTP-binding protein 1 (NOG1) PF00503:G-protein alpha subunit PF00025:ADP-ribosylation factor family PF08477:Ras of Complex, Roc, domain of DAPkinase PF00071:Ras family}
A00821	{Contig10:2048136:2052518:+}	{OJA09935.1; hypothetical protein AZE42_04891 [Rhizopogon vesiculosus]}	{NA}	{NA}	{NA}	{NA}	{GO:0016616; oxidoreductase activity, acting on the CH-OH group of donors, NAD or NADP as acceptor; molecular_function GO:0055114; oxidation-reduction process; biological_process}	{NA}	{NA}	{NA}	{NA}	{NA}	{PF00180:Isocitrate/isopropylmalate dehydrogenase}
A00822	{Contig10:2053342:2053812:-}	{KAG2158919.1; hypothetical protein EDB93DRAFT_1117050 [Suillus bovinus]}	{NA}	{NA}	{NA}	{NA}	{GO:0005351; sugar:hydrogen symporter activity; molecular_function GO:0008965; phosphoenolpyruvate-protein phosphotransferase activity; molecular_function GO:0005737; cytoplasm; cellular_component GO:0016021; integral to membrane; cellular_component GO:0009401; phosphoenolpyruvate-dependent sugar phosphotransferase system; biological_process}	{NA}	{NA}	{NA}	{NA}	{NA}	{PF05524:PEP-utilising enzyme, N-terminal PF09726:Macoilin family}
A00823	{Contig10:2054145:2059739:+}	{KAG2158918.1; hypothetical protein EDB93DRAFT_1325023 [Suillus bovinus]}	{NA}	{cput:CONPUDRAFT_139549; K22909 ZC3H13 zinc finger CCCH domain-containing protein 13 -- }	{NA}	{NA}	{GO:0007050; cell cycle arrest; biological_process GO:0019028; viral capsid; cellular_component}	{NA}	{NA}	{NA}	{NA}	{NA}	{PF05531:Nucleopolyhedrovirus P10 protein PF02187:Growth-Arrest-Specific Protein 2 Domain}
A00824	{Contig10:2060290:2061754:+}	{KAG2158917.1; hypothetical protein EDB93DRAFT_431742 [Suillus bovinus]}	{NA}	{sla:SERLADRAFT_406467; }	{NA}	{NA}	{GO:0008017; microtubule binding; molecular_function}	{NA}	{NA}	{NA}	{NA}	{NA}	{PF06657:Centrosome microtubule-binding domain of Cep57}
A00825	{Contig10:217186:217963:+}	{KAG2124390.1; hypothetical protein EDB93DRAFT_1110658 [Suillus bovinus]}	{NA}	{NA}	{NA}	{NA}	{GO:0006886; intracellular protein transport; biological_process GO:0005737; cytoplasm; cellular_component GO:0016020; membrane; cellular_component GO:0008565; protein transporter activity; molecular_function}	{NA}	{NA}	{NA}	{NA}	{NA}	{PF04871:Uso1 / p115 like vesicle tethering protein, C terminal region}
A00826	{Contig10:2062024:2065386:-}	{KAG2158916.1; hypothetical protein EDB93DRAFT_1325021 [Suillus bovinus]}	{NA}	{NA}	{NA}	{NA}	{NA}	{NA}	{NA}	{NA}	{NA}	{NA}	{NA}
A00827	{Contig10:2066924:2069994:+}	{KAG2158915.1; P-loop containing nucleoside triphosphate hydrolase protein [Suillus bovinus]}	{O59751; Kinesin-like protein 6 }	{cput:CONPUDRAFT_146687; K10401 KIF18_19 kinesin family member 18/19 -- }	{SPBC649.01c; KOG0242 Kinesin-like protein Z Cytoskeleton ;}	{NA}	{GO:0008017; microtubule binding; molecular_function GO:0007018; microtubule-based movement; biological_process GO:0003777; microtubule motor activity; molecular_function GO:0005524; ATP binding; molecular_function}	{NA}	{NA}	{NA}	{NA}	{NA}	{PF00225:Kinesin motor domain}
A00828	{Contig10:2070831:2071594:-}	{KAG1892735.1; emp24/gp25L/p24 family/GOLD-domain-containing protein [Suillus subluteus]}	{Q9P7I9; Endosomal protein P24B }	{cput:CONPUDRAFT_158188; K20347 TMED2, EMP24 p24 family protein beta-1 -- }	{SPCC24B10.17; KOG1692 Putative cargo transport protein EMP24 (p24 protein family) U Intracellular trafficking, secretion, and vesicular transport ;}	{gnl|TC-DB|Q15363; 9.B.188.1.2 Transmembrane emp24 domain-containing protein 2 OS=Homo sapiens GN=TMED2 PE=1 SV=1}	{GO:0006810; transport; biological_process GO:0016021; integral to membrane; cellular_component}	{NA}	{NA}	{NA}	{NA}	{NA}	{PF01105:emp24/gp25L/p24 family/GOLD}
A00829	{Contig10:2071926:2072672:+}	{KAG2158913.1; ran/spi1 binding protein [Suillus bovinus]}	{Q09717; Ran-specific GTPase-activating protein 1 }	{gtr:GLOTRDRAFT_125685; K15306 RANBP1 Ran-binding protein 1 -- Human Diseases; Infectious diseases: Viral; Human T-cell leukemia virus 1 infection [PATH:ko05166] Human Diseases; Cancers: Overview; Viral carcinogenesis [PATH:ko05203]}	{SPBC1773.07c; KOG0864 Ran-binding protein RANBP1 and related RanBD domain proteins U Intracellular trafficking, secretion, and vesicular transport ;}	{NA}	{GO:0046907; intracellular transport; biological_process GO:0006810; transport; biological_process GO:0016021; integral to membrane; cellular_component}	{NA}	{NA}	{NA}	{NA}	{NA}	{PF00638:RanBP1 domain PF13897:Golgi-dynamics membrane-trafficking}
A00830	{Contig10:2073141:2075464:-}	{KAG2158912.1; P-loop containing nucleoside triphosphate hydrolase protein [Suillus bovinus]}	{A0LSV2; ATP-dependent Clp protease ATP-binding subunit ClpX }	{sla:SERLADRAFT_435118; K03544 clpX, CLPX ATP-dependent Clp protease ATP-binding subunit ClpX -- Cellular Processes; Cell growth and death; Cell cycle - Caulobacter [PATH:ko04112]}	{At1g33360; KOG0745 Putative ATP-dependent Clp-type protease (AAA+ ATPase superfamily) O Posttranslational modification, protein turnover, chaperones ;}	{NA}	{GO:0015995; chlorophyll biosynthetic process; biological_process GO:0007049; cell cycle; biological_process GO:0008026; ATP-dependent helicase activity; molecular_function GO:0005524; ATP binding; molecular_function GO:0006260; DNA replication; biological_process GO:0003676; nucleic acid binding; molecular_function GO:0006281; DNA repair; biological_process GO:0006810; transport; biological_proc…	{NA}	{NA}	{NA}	{NA}	{NA}	{PF00493:MCM P-loop domain PF05496:Holliday junction DNA helicase RuvB P-loop domain PF07728:AAA domain (dynein-related subfamily) PF00270:DEAD/DEAH box helicase PF00158:Sigma-54 interaction domain PF01695:IstB-like ATP binding protein PF01078:Magnesium chelatase, subunit ChlI PF07726:ATPase family associated with various cellular activities (AAA) PF00004:ATPase family associated with various cel…
A00831	{Contig10:2075697:2085058:+}	{TFY80751.1; hypothetical protein EWM64_g3261 [Hericium alpestre]}	{O94609; Ubiquitin-activating enzyme E1 1 }	{sla:SERLADRAFT_360126; K03178 UBE1, UBA1 ubiquitin-activating enzyme E1 6.2.1.45 Genetic Information Processing; Folding, sorting and degradation; Ubiquitin mediated proteolysis [PATH:ko04120] Human Diseases; Neurodegenerative diseases; Parkinson disease [PATH:ko05012]}	{Hs4507763; KOG2012 Ubiquitin activating enzyme UBA1 O Posttranslational modification, protein turnover, chaperones ;}	{gnl|TC-DB|E7LWL7; 3.A.16.1.2 Uba1p OS=Saccharomyces cerevisiae (strain VIN 13) GN=VIN13_2757 PE=3 SV=1}	{GO:0005515; protein binding; molecular_function GO:0003824; NA}	{NA}	{NA}	{NA}	{NA}	{NA}	{PF00899:ThiF family PF09732:Cactus-binding C-terminus of cactin protein}
A00832	{Contig10:2086027:2088298:-}	{KAG2158908.1; hypothetical protein EDB93DRAFT_1245471 [Suillus bovinus]}	{NA}	{NA}	{NA}	{NA}	{GO:0019901; protein kinase binding; molecular_function GO:0000079; regulation of cyclin-dependent protein kinase activity; biological_process}	{NA}	{NA}	{NA}	{NA}	{NA}	{PF08613:Cyclin}
A00833	{Contig10:2089271:2093404:+}	{KAG2158907.1; hypothetical protein EDB93DRAFT_1325013 [Suillus bovinus]}	{NA}	{sla:SERLADRAFT_366889; }	{NA}	{NA}	{NA}	{NA}	{NA}	{NA}	{NA}	{NA}	{NA}
A00834	{Contig10:2094924:2096662:-}	{KAG2158906.1; putative diphthamide synthesis protein-domain-containing protein [Suillus bovinus]}	{P0CN19; 2-(3-amino-3-carboxypropyl)histidine synthase subunit 1 }	{sla:SERLADRAFT_446577; K07561 DPH1, dph2 2-(3-amino-3-carboxypropyl)histidine synthase 2.5.1.108 }	{7294688; KOG2648 Diphthamide biosynthesis protein J Translation, ribosomal structure and biogenesis ;}	{NA}	{GO:0005085; guanyl-nucleotide exchange factor activity; molecular_function GO:0005622; intracellular; cellular_component GO:0005737; cytoplasm; cellular_component GO:0007264; small GTPase mediated signal transduction; biological_process GO:0017183; peptidyl-diphthamide biosynthetic process from peptidyl-histidine; biological_process}	{NA}	{NA}	{NA}	{NA}	{NA}	{PF01866:Putative diphthamide synthesis protein PF00617:RasGEF domain}
A00835	{Contig10:2096964:2101457:+}	{KAG2158905.1; patched family-domain-containing protein [Suillus bovinus]}	{NA}	{sla:SERLADRAFT_406479; K12385 NPC1 Niemann-Pick C1 protein -- Cellular Processes; Transport and catabolism; Lysosome [PATH:ko04142] Organismal Systems; Digestive system; Cholesterol metabolism [PATH:ko04979]}	{NA}	{NA}	{GO:0008158; hedgehog receptor activity; molecular_function GO:0006810; transport; biological_process GO:0005215; NA GO:0016020; membrane; cellular_component}	{PHI:1167; I1RY25 NPC1 5518 Fusarium graminearum Fusarium Ear Blight Triticum aestivum x Triticum timopheevi (related: common wheat x sanduri wheat) sterol trafficking gene deletion: full reduced virulence}	{NA}	{NA}	{NA}	{NA}	{PF02460:Patched family PF00873:AcrB/AcrD/AcrF family}
A00836	{Contig10:219038:221993:+}	{KAG2123260.1; hypothetical protein EDB93DRAFT_1259155, partial [Suillus bovinus]}	{NA}	{NA}	{NA}	{NA}	{GO:0005515; protein binding; molecular_function}	{NA}	{NA}	{NA}	{NA}	{NA}	{PF08007:Cupin superfamily protein}
A00837	{Contig10:2101474:2102446:-}	{KAG1853243.1; hypothetical protein C8R48DRAFT_675909 [Suillus tomentosus]}	{NA}	{sla:SERLADRAFT_460616; K14325 RNPS1 RNA-binding protein with serine-rich domain 1 -- Genetic Information Processing; Translation; RNA transport [PATH:ko03013] Genetic Information Processing; Translation; mRNA surveillance pathway [PATH:ko03015]}	{NA}	{NA}	{GO:0003676; nucleic acid binding; molecular_function}	{NA}	{NA}	{NA}	{NA}	{NA}	{PF00076:RNA recognition motif. (a.k.a. RRM, RBD, or RNP domain)}
A00838	{Contig10:2103007:2104437:-}	{KAG1791421.1; hypothetical protein HD556DRAFT_1386455 [Suillus plorans]}	{NA}	{NA}	{NA}	{NA}	{NA}	{NA}	{NA}	{NA}	{NA}	{NA}	{NA}
A00839	{Contig10:2104662:2105810:+}	{KAG2043095.1; hypothetical protein BDR03DRAFT_852857 [Suillus americanus]}	{NA}	{sla:SERLADRAFT_460620; K00326 E1.6.2.2 cytochrome-b5 reductase 1.6.2.2 Metabolism; Carbohydrate metabolism; Amino sugar and nucleotide sugar metabolism [PATH:ko00520]}	{NA}	{NA}	{GO:0055114; oxidation-reduction process; biological_process GO:0016491; oxidoreductase activity; molecular_function}	{NA}	{NA}	{NA}	{NA}	{NA}	{PF08030:Ferric reductase NAD binding domain PF00175:Oxidoreductase NAD-binding domain }
A00840	{Contig10:2107311:2109008:+}	{KAG2158901.1; hypothetical protein EDB93DRAFT_430292 [Suillus bovinus]}	{NA}	{NA}	{NA}	{NA}	{NA}	{NA}	{NA}	{NA}	{NA}	{NA}	{NA}
A00841	{Contig10:2109296:2110114:+}	{KAG2158900.1; hypothetical protein EDB93DRAFT_430238 [Suillus bovinus]}	{NA}	{sla:SERLADRAFT_446582; K15135 MED18 mediator of RNA polymerase II transcription subunit 18 -- }	{NA}	{NA}	{GO:0016592; mediator complex; cellular_component GO:0001104; RNA polymerase II transcription cofactor activity; molecular_function GO:0006357; regulation of transcription from RNA polymerase II promoter; biological_process}	{NA}	{NA}	{NA}	{NA}	{NA}	{PF09637:Med18 protein}
A00842	{Contig10:2110462:2111935:+}	{KAG2158899.1; hypothetical protein EDB93DRAFT_430239 [Suillus bovinus]}	{NA}	{lbc:LACBIDRAFT_305745; }	{NA}	{NA}	{GO:0008270; zinc ion binding; molecular_function GO:0005622; intracellular; cellular_component}	{NA}	{NA}	{NA}	{NA}	{NA}	{PF00643:B-box zinc finger}
A00843	{Contig10:2112361:2113239:+}	{KAG2158898.1; hypothetical protein EDB93DRAFT_1076321, partial [Suillus bovinus]}	{NA}	{NA}	{NA}	{NA}	{GO:0008270; zinc ion binding; molecular_function}	{NA}	{NA}	{NA}	{NA}	{NA}	{PF06839:GRF zinc finger}
A00844	{Contig10:2113517:2114109:+}	{KAG2158897.1; hypothetical protein EDB93DRAFT_1245461 [Suillus bovinus]}	{NA}	{NA}	{NA}	{NA}	{NA}	{NA}	{NA}	{NA}	{NA}	{NA}	{NA}
A00845	{Contig10:2114243:2115323:-}	{KAG2158896.1; cytokine-induced anti-apoptosis inhibitor 1, Fe-S biogenesis-domain-containing protein [Suillus bovinus]}	{B0CRU6; Fe-S cluster assembly protein DRE2 }	{cput:CONPUDRAFT_54848; K22746 CIAPIN1, DRE2 anamorsin -- }	{NA}	{NA}	{GO:0006915; apoptosis; biological_process GO:0005737; cytoplasm; cellular_component GO:0051536; iron-sulfur cluster binding; molecular_function GO:0016226; iron-sulfur cluster assembly; biological_process}	{NA}	{NA}	{NA}	{NA}	{NA}	{PF05093:Cytokine-induced anti-apoptosis inhibitor 1, Fe-S biogenesis}
A00846	{Contig10:2115685:2116908:-}	{KAG1795486.1; hypothetical protein EV424DRAFT_1447892 [Suillus variegatus|Suillus bovinus]}	{NA}	{sla:SERLADRAFT_460630; }	{NA}	{NA}	{GO:0043565; sequence-specific DNA binding; molecular_function GO:0006355; regulation of transcription, DNA-dependent; biological_process GO:0003700; sequence-specific DNA binding transcription factor activity; molecular_function}	{NA}	{NA}	{NA}	{NA}	{NA}	{PF00250:Forkhead domain}
A00847	{Contig10:222416:226439:+}	{KAG2124391.1; hypothetical protein EDB93DRAFT_1110659 [Suillus bovinus]}	{NA}	{NA}	{NA}	{NA}	{GO:0008234; cysteine-type peptidase activity; molecular_function GO:0006508; proteolysis; biological_process}	{NA}	{NA}	{NA}	{NA}	{NA}	{PF02902:Ulp1 protease family, C-terminal catalytic domain}
A00848	{Contig10:2119220:2119654:-}	{KAG2135868.1; hypothetical protein EDB93DRAFT_1254121 [Suillus bovinus]}	{NA}	{NA}	{NA}	{NA}	{GO:0006351; transcription, DNA-dependent; biological_process GO:0003887; DNA-directed DNA polymerase activity; molecular_function GO:0008270; zinc ion binding; molecular_function GO:0005634; nucleus; cellular_component GO:0003677; DNA binding; molecular_function}	{NA}	{NA}	{NA}	{NA}	{NA}	{PF04931:DNA polymerase phi PF06524:NOA36 protein}
A00849	{Contig10:2123065:2124369:+}	{KAG2744929.1; hypothetical protein P692DRAFT_201868924 [Suillus brevipes Sb2]}	{NA}	{sla:SERLADRAFT_438621; }	{NA}	{NA}	{NA}	{NA}	{NA}	{NA}	{NA}	{NA}	{NA}
A00850	{Contig10:2124974:2125363:+}	{KAG2158892.1; hypothetical protein EDB93DRAFT_430033 [Suillus bovinus]}	{NA}	{NA}	{NA}	{NA}	{NA}	{NA}	{NA}	{NA}	{NA}	{NA}	{NA}
A00851	{Contig10:2125803:2127130:+}	{KAG2158891.1; Sucraseferredoxin-like protein [Suillus bovinus]}	{NA}	{cput:CONPUDRAFT_103206; }	{NA}	{NA}	{NA}	{NA}	{NA}	{NA}	{NA}	{NA}	{NA}
A00852	{Contig10:2127568:2130377:-}	{KAG1907428.1; Pkinase-domain-containing protein [Suillus fuscotomentosus]}	{P11792; Serine/threonine-protein kinase SCH9 }	{sla:SERLADRAFT_347000; K19800 SCH9 serine/threonine protein kinase SCH9 2.7.11.1 Cellular Processes; Transport and catabolism; Autophagy - yeast [PATH:ko04138] Organismal Systems; Aging; Longevity regulating pathway - multiple species [PATH:ko04213]}	{YHR205w; KOG0598 Ribosomal protein S6 kinase and related proteins RT General function prediction only ; Signal transduction mechanisms ;}	{NA}	{GO:0016020; membrane; cellular_component GO:0004674; protein serine/threonine kinase activity; molecular_function GO:0004672; protein kinase activity; molecular_function GO:0016773; phosphotransferase activity, alcohol group as acceptor; molecular_function GO:0005524; ATP binding; molecular_function GO:0005515; protein binding; molecular_function GO:0006468; protein phosphorylation; biological_p…	{PHI:376; Q8NKF8 SCH9 5207 Cryptococcus neoformans Cryptococcosis Mus musculus (related: house mouse) Protein Kinase gene disruption; gene complementation reduced virulence}	{Q8NKF8_CRYNV; SCH9 AAM21494.1 690 Cryptococcus neoformans 178876 CATALYTIC ACTIVITY: ATP + a protein = ADP + a phosphoprotein.; SIMILARITY: Contains 1 AGC-kinase C-terminal domain. 15503029 Unknown {ID:PF00168; Description: C2} {ID:PF00069; Description: C2} {ID:PF00433; Description: Pkinase} humans vertebrata cryptococcosis Cryptococcosis {ID:0005524; Method: IEA:UniProtKB-KW; Description: F:ATP…	{NA}	{NA}	{NA}	{PF00433:Protein kinase C terminal domain PF00168:C2 domain PF07714:Protein tyrosine and serine/threonine kinase PF06293:Lipopolysaccharide kinase (Kdo/WaaP) family PF00069:Protein kinase domain}
A00853	{Contig10:2130456:2133283:-}	{KAG2118969.1; acyl-CoA dehydrogenase/oxidase [Suillus discolor]}	{NA}	{sla:SERLADRAFT_460647; K00249 ACADM, acd acyl-CoA dehydrogenase 1.3.8.7 Metabolism; Lipid metabolism; Fatty acid degradation [PATH:ko00071] Metabolism; Amino acid metabolism; Valine, leucine and isoleucine degradation [PATH:ko00280] Metabolism; Metabolism of other amino acids; beta-Alanine metabolism [PATH:ko00410] Metabolism; Carbohydrate metabolism; Propanoate metabolism [PATH:ko00640] Metabol…	{NA}	{NA}	{GO:0016627; oxidoreductase activity, acting on the CH-CH group of donors; molecular_function GO:0050660; flavin adenine dinucleotide binding; molecular_function GO:0055114; oxidation-reduction process; biological_process GO:0003995; acyl-CoA dehydrogenase activity; molecular_function GO:0008152; NA}	{NA}	{NA}	{NA}	{NA}	{NA}	{PF00441:Acyl-CoA dehydrogenase, C-terminal domain PF02770:Acyl-CoA dehydrogenase, middle domain PF02771:Acyl-CoA dehydrogenase, N-terminal domain}
A00854	{Contig10:2133692:2136820:-}	{KAG2158887.1; fungal-specific transcription factor domain-containing protein [Suillus bovinus]}	{NA}	{sla:SERLADRAFT_446591; }	{NA}	{NA}	{GO:0006351; transcription, DNA-dependent; biological_process GO:0016021; integral to membrane; cellular_component GO:0006355; regulation of transcription, DNA-dependent; biological_process GO:0000981; sequence-specific DNA binding RNA polymerase II transcription factor activity; molecular_function GO:0005634; nucleus; cellular_component GO:0008270; zinc ion binding; molecular_function GO:0003677…	{NA}	{NA}	{NA}	{NA}	{NA}	{PF04082:Fungal specific transcription factor domain PF04159:NB glycoprotein PF00172:Fungal Zn(2)-Cys(6) binuclear cluster domain}
A00855	{Contig10:2140568:2142273:+}	{KAG2158886.1; hypothetical protein EDB93DRAFT_1099977 [Suillus bovinus]}	{Q7ZXB8; Polyadenylate-binding protein 2-B }	{sla:SERLADRAFT_446592; }	{At5g10350; KOG4209 Splicing factor RNPS1, SR protein superfamily A RNA processing and modification ;}	{NA}	{GO:0006412; translation; biological_process GO:0003676; nucleic acid binding; molecular_function GO:0005840; ribosome; cellular_component GO:0005622; intracellular; cellular_component GO:0003735; structural constituent of ribosome; molecular_function}	{NA}	{NA}	{NA}	{NA}	{NA}	{PF01245:Ribosomal protein L19 PF00076:RNA recognition motif. (a.k.a. RRM, RBD, or RNP domain)}
A00856	{Contig10:2142795:2144588:+}	{KAG2158885.1; hypothetical protein EDB93DRAFT_429621 [Suillus bovinus]}	{NA}	{sla:SERLADRAFT_446593; }	{NA}	{NA}	{GO:0017124; SH3 domain binding; molecular_function GO:0008093; cytoskeletal adaptor activity; molecular_function GO:0007165; signal transduction; biological_process GO:0051082; unfolded protein binding; molecular_function GO:0046847; filopodium assembly; biological_process}	{NA}	{NA}	{NA}	{NA}	{NA}	{PF03938:Outer membrane protein (OmpH-like) PF08397:IRSp53/MIM homology domain}
A00857	{Contig10:2144749:2147516:-}	{KAG2158884.1; tRNA synthetases class II-domain-containing protein [Suillus bovinus]}	{NA}	{cput:CONPUDRAFT_136775; K01876 aspS aspartyl-tRNA synthetase 6.1.1.12 Genetic Information Processing; Translation; Aminoacyl-tRNA biosynthesis [PATH:ko00970]}	{NA}	{NA}	{GO:0003676; nucleic acid binding; molecular_function GO:0006418; tRNA aminoacylation for protein translation; biological_process GO:0004812; aminoacyl-tRNA ligase activity; molecular_function GO:0005524; ATP binding; molecular_function GO:0000166; nucleotide binding; molecular_function}	{NA}	{NA}	{NA}	{NA}	{NA}	{PF01336:OB-fold nucleic acid binding domain PF00152:tRNA synthetases class II (D, K and N) }
A00858	{Contig10:227786:230715:+}	{KAG2124392.1; hypothetical protein EDB93DRAFT_1110660, partial [Suillus bovinus]}	{NA}	{NA}	{NA}	{NA}	{NA}	{NA}	{NA}	{NA}	{NA}	{NA}	{NA}
A00859	{Contig10:2147857:2148907:+}	{KAG2158883.1; hypothetical protein EDB93DRAFT_1099974 [Suillus bovinus]}	{NA}	{gtr:GLOTRDRAFT_71084; }	{NA}	{NA}	{GO:0005515; protein binding; molecular_function}	{NA}	{NA}	{NA}	{NA}	{NA}	{PF00646:F-box domain}
A00860	{Contig10:2149062:2150079:-}	{KAG2158882.1; hypothetical protein EDB93DRAFT_1075627 [Suillus bovinus]}	{A0A0S1RVB0; 4'-phosphopantetheinyl transferase pptA }	{sla:SERLADRAFT_460658; K06133 LYS5, acpT 4'-phosphopantetheinyl transferase 2.7.8.- Metabolism; Metabolism of cofactors and vitamins; Pantothenate and CoA biosynthesis [PATH:ko00770]}	{NA}	{NA}	{GO:0008897; holo-[acyl-carrier-protein] synthase activity; molecular_function GO:0000287; magnesium ion binding; molecular_function GO:0009059; macromolecule biosynthetic process; biological_process}	{NA}	{NA}	{NA}	{NA}	{NA}	{PF01648:4'-phosphopantetheinyl transferase superfamily}
A00861	{Contig10:2150230:2151642:+}	{KAG2158881.1; Ribokinase-like protein [Suillus bovinus]}	{NA}	{mrr:Moror_17671; }	{NA}	{NA}	{NA}	{NA}	{NA}	{NA}	{NA}	{NA}	{NA}
A00862	{Contig10:2151721:2152389:-}	{KAG2158880.1; TATA binding protein-associated phosphoprotein [Suillus bovinus]}	{O14348; Negative cofactor 2 complex subunit beta }	{lbc:LACBIDRAFT_176793; K21751 DR1, NC2-beta down-regulator of transcription 1 -- }	{SPBC30D10.02; KOG0871 Class 2 transcription repressor NC2, beta subunit (Dr1) K Transcription ;}	{NA}	{GO:0043565; sequence-specific DNA binding; molecular_function GO:0005622; intracellular; cellular_component GO:0003677; DNA binding; molecular_function}	{PHI:1467; I1RXZ0 GzCCAAT007 5518 Fusarium graminearum Fusarium Ear Blight Triticum (related: wheat) transcription factor gene deletion unaffected pathogenicity}	{NA}	{NA}	{NA}	{NA}	{PF00808:Histone-like transcription factor (CBF/NF-Y) and archaeal histone PF00125:Core histone H2A/H2B/H3/H4}
A00863	{Contig10:2159663:2161485:+}	{KAG2158874.1; actin family [Suillus bovinus]}	{NA}	{sla:SERLADRAFT_460685; }	{NA}	{NA}	{GO:0000902; cell morphogenesis; biological_process}	{NA}	{NA}	{NA}	{NA}	{NA}	{PF06723:MreB/Mbl protein}
A00864	{Contig10:2162411:2163903:-}	{KAG2158873.1; hypothetical protein EDB93DRAFT_428826 [Suillus bovinus]}	{NA}	{sla:SERLADRAFT_460691; }	{NA}	{NA}	{NA}	{NA}	{NA}	{NA}	{NA}	{NA}	{NA}
A00865	{Contig10:2164521:2165208:-}	{KAG2158872.1; Sedlin [Suillus bovinus]}	{Q3T0F2; Trafficking protein particle complex subunit 2 }	{sla:SERLADRAFT_460695; K20301 TRAPPC2, TRS20 trafficking protein particle complex subunit 2 -- }	{Hs7657548; KOG3487 TRAPP 20 K subunit U Intracellular trafficking, secretion, and vesicular transport ;}	{NA}	{GO:0005622; intracellular; cellular_component GO:0006888; ER to Golgi vesicle-mediated transport; biological_process GO:0005801; cis-Golgi network; cellular_component}	{NA}	{NA}	{NA}	{NA}	{NA}	{PF04628:Sedlin, N-terminal conserved region PF04099:Sybindin-like family }
A00866	{Contig10:2165493:2166528:+}	{KAG1832931.1; hypothetical protein EV424DRAFT_1004698 [Suillus variegatus]}	{NA}	{sla:SERLADRAFT_382112; }	{NA}	{NA}	{GO:0042710; biofilm formation; biological_process GO:0016021; integral to membrane; cellular_component GO:0004252; serine-type endopeptidase activity; molecular_function}	{NA}	{NA}	{NA}	{NA}	{NA}	{PF01694:Rhomboid family PF13994:PgaD-like protein}
A00867	{Contig10:2166823:2172100:-}	{KAG2158870.1; clasp N terminal-domain-containing protein [Suillus bovinus]}	{NA}	{cput:CONPUDRAFT_143692; K16578 CLASP1_2 CLIP-associating protein 1/2 -- }	{NA}	{NA}	{GO:0005515; protein binding; molecular_function GO:0045454; cell redox homeostasis; biological_process GO:0030117; membrane coat; cellular_component GO:0016192; vesicle-mediated transport; biological_process GO:0008430; selenium binding; molecular_function GO:0006886; intracellular protein transport; biological_process}	{NA}	{NA}	{NA}	{NA}	{NA}	{PF01602:Adaptin N terminal region PF10262:Rdx family PF02985:HEAT repeat}
A00868	{Contig10:2172256:2174044:+}	{KAG2158868.1; P-loop containing nucleoside triphosphate hydrolase protein [Suillus bovinus]}	{Q6PH52; Pachytene checkpoint protein 2 homolog }	{cput:CONPUDRAFT_122923; K22399 TRIP13 pachytene checkpoint protein 2 -- }	{Hs11321607; KOG0744 AAA+-type ATPase O Posttranslational modification, protein turnover, chaperones ;}	{NA}	{GO:0006576; cellular biogenic amine metabolic process; biological_process GO:0015995; chlorophyll biosynthetic process; biological_process GO:0005524; ATP binding; molecular_function GO:0006281; DNA repair; biological_process GO:0016851; magnesium chelatase activity; molecular_function GO:0009378; four-way junction helicase activity; molecular_function GO:0006139; nucleobase, nucleoside, nucleot…	{NA}	{NA}	{NA}	{NA}	{NA}	{PF07728:AAA domain (dynein-related subfamily) PF01637:ATPase domain predominantly from Archaea PF05496:Holliday junction DNA helicase RuvB P-loop domain PF02224:Cytidylate kinase PF00005:ABC transporter PF07724:AAA domain (Cdc48 subfamily) PF02562:PhoH-like protein PF03266:NTPase PF06068:TIP49 P-loop domain PF10662:Ethanolamine utilisation - propanediol utilisation PF02367:Threonylcarbamoyl aden…
A00869	{Contig10:231928:234554:-}	{KAG1727432.1; hypothetical protein EDB19DRAFT_198908 [Suillus lakei]}	{NA}	{NA}	{NA}	{NA}	{GO:0006468; protein phosphorylation; biological_process GO:0004672; protein kinase activity; molecular_function GO:0005524; ATP binding; molecular_function}	{NA}	{NA}	{NA}	{NA}	{NA}	{PF00069:Protein kinase domain}
A00870	{Contig10:2174317:2176182:-}	{KAG2158867.1; hypothetical protein EDB93DRAFT_1334303 [Suillus bovinus]}	{NA}	{sla:SERLADRAFT_435169; }	{NA}	{NA}	{NA}	{NA}	{NA}	{NA}	{NA}	{NA}	{NA}
A00871	{Contig10:2176959:2177301:-}	{KAG1762290.1; hypothetical protein EDD22DRAFT_892682 [Suillus luteus UH-Slu-Lm8-n1|Suillus occidentalis|Suillus cothurnatus|Suillus subaureus|Suillus brevipes Sb2|Suillus americanus|Suillus decipiens|Suillus spraguei]}	{Q3ZBL0; Small nuclear ribonucleoprotein G }	{sla:SERLADRAFT_460722; K11099 SNRPG, SMG small nuclear ribonucleoprotein G -- Genetic Information Processing; Transcription; Spliceosome [PATH:ko03040]}	{Hs4507133; KOG1780 Small Nuclear ribonucleoprotein G A RNA processing and modification ;}	{NA}	{NA}	{NA}	{NA}	{NA}	{NA}	{NA}	{NA}
A00872	{Contig10:2177615:2179297:+}	{KAG2118947.1; hypothetical protein F5147DRAFT_667581 [Suillus discolor]}	{NA}	{sla:SERLADRAFT_460726; }	{NA}	{NA}	{NA}	{NA}	{NA}	{NA}	{NA}	{NA}	{NA}
A00873	{Contig10:2179599:2181209:-}	{KAG2158865.1; hypothetical protein EDB93DRAFT_1197959 [Suillus bovinus]}	{B8P366; Mitochondrial distribution and morphology protein 10 }	{sla:SERLADRAFT_360150; K17774 MDM10 mitochondrial distribution and morphology protein 10 -- Cellular Processes; Transport and catabolism; Mitophagy - yeast [PATH:ko04139]}	{NA}	{NA}	{GO:0005741; mitochondrial outer membrane; cellular_component GO:0055085; transmembrane transport; biological_process}	{NA}	{NA}	{NA}	{NA}	{NA}	{PF01459:Eukaryotic porin}
A00874	{Contig10:2181555:2183611:-}	{KAG2158864.1; kinase-like domain-containing protein [Suillus bovinus]}	{NA}	{sla:SERLADRAFT_460732; }	{NA}	{NA}	{GO:0004672; protein kinase activity; molecular_function GO:0006468; protein phosphorylation; biological_process GO:0005524; ATP binding; molecular_function}	{NA}	{NA}	{NA}	{NA}	{NA}	{PF00069:Protein kinase domain PF07714:Protein tyrosine and serine/threonine kinase}
A00875	{Contig10:2184052:2185010:+}	{KAG2158863.1; hypothetical protein EDB93DRAFT_1116767 [Suillus bovinus]}	{NA}	{hir:HETIRDRAFT_381688; }	{NA}	{NA}	{NA}	{NA}	{NA}	{NA}	{NA}	{NA}	{NA}
A00876	{Contig10:2185301:2185642:+}	{KAG2158862.1; hypothetical protein EDB93DRAFT_428533 [Suillus bovinus]}	{NA}	{cci:CC1G_00113; }	{NA}	{NA}	{GO:0016020; membrane; cellular_component GO:0042158; lipoprotein biosynthetic process; biological_process GO:0009249; protein lipoylation; biological_process GO:0016757; transferase activity, transferring glycosyl groups; molecular_function}	{NA}	{NA}	{NA}	{NA}	{NA}	{PF01790:Prolipoprotein diacylglyceryl transferase}
A00877	{Contig10:2185678:2186543:-}	{KAG2158861.1; hypothetical protein EDB93DRAFT_1237679 [Suillus bovinus]}	{P0CQ33; DNA replication complex GINS protein PSF3 }	{sla:SERLADRAFT_460777; K10734 GINS3 GINS complex subunit 3 -- }	{NA}	{NA}	{NA}	{NA}	{NA}	{NA}	{NA}	{NA}	{NA}
A00878	{Contig10:2186641:2187153:+}	{KAG2158860.1; hypothetical protein EDB93DRAFT_1116750 [Suillus bovinus]}	{NA}	{sla:SERLADRAFT_460776; }	{NA}	{NA}	{GO:0009307; DNA restriction-modification system; biological_process GO:0003677; DNA binding; molecular_function GO:0009036; Type II site-specific deoxyribonuclease activity; molecular_function}	{NA}	{NA}	{NA}	{NA}	{NA}	{PF09573:TaqI restriction endonuclease}
A00879	{Contig10:2187258:2189407:+}	{KAG2158859.1; RNA polymerase III transcription factor IIIC subunit-domain-containing protein, partial [Suillus bovinus]}	{NA}	{sla:SERLADRAFT_460774; K15202 GTF3C5, TFC1 general transcription factor 3C polypeptide 5 (transcription factor C subunit 1) -- }	{NA}	{NA}	{NA}	{NA}	{NA}	{NA}	{NA}	{NA}	{NA}
A00880	{Contig10:236748:240757:-}	{KAG2352812.1; hypothetical protein BDR07DRAFT_1497598 [Suillus spraguei]}	{NA}	{NA}	{NA}	{NA}	{GO:0003678; DNA helicase activity; molecular_function GO:0005524; ATP binding; molecular_function GO:0098519; NA GO:0015995; chlorophyll biosynthetic process; biological_process GO:0016887; ATPase activity; molecular_function GO:0000723; telomere maintenance; biological_process GO:0006281; DNA repair; biological_process GO:0004386; helicase activity; molecular_function GO:0016851; magnesium chel…	{NA}	{NA}	{NA}	{NA}	{NA}	{PF00004:ATPase family associated with various cellular activities (AAA) PF00580:UvrD/REP helicase N-terminal domain PF03266:NTPase PF01078:Magnesium chelatase, subunit ChlI PF07728:AAA domain (dynein-related subfamily) PF05970:PIF1-like helicase PF02689:Helicase}
A00881	{Contig10:2189851:2192552:+}	{KAG2158858.1; aconitase family-domain-containing protein [Suillus bovinus]}	{P55251; 3-isopropylmalate dehydratase }	{sla:SERLADRAFT_360155; K01702 LEU1 3-isopropylmalate dehydratase 4.2.1.33 Metabolism; Amino acid metabolism; Valine, leucine and isoleucine biosynthesis [PATH:ko00290] Metabolism; Global and overview maps; Metabolic pathways [PATH:ko01100] Metabolism; Global and overview maps; Biosynthesis of secondary metabolites [PATH:ko01110] Metabolism; Global and overview maps; 2-Oxocarboxylic acid metaboli…	{SPAC9E9.03; KOG0454 3-isopropylmalate dehydratase (aconitase superfamily) E Amino acid transport and metabolism ;}	{NA}	{GO:0008152; NA}	{PHI:8734__PHI:9355; NA}	{NA}	{NA}	{NA}	{NA}	{PF00330:Aconitase family (aconitate hydratase) PF00694:Aconitase C-terminal domain}
A00882	{Contig10:2192782:2194455:+}	{KAG2158857.1; hypothetical protein EDB93DRAFT_1116738 [Suillus bovinus]}	{NA}	{sla:SERLADRAFT_435182; }	{NA}	{NA}	{NA}	{NA}	{NA}	{NA}	{NA}	{NA}	{NA}
A00883	{Contig10:2194967:2197444:+}	{KAG2158856.1; Six-hairpin glycosidase-like protein [Suillus bovinus]}	{Q10449; Meiotically up-regulated gene 157 protein }	{pco:PHACADRAFT_205888; K09704 K09704 uncharacterized protein -- }	{NA}	{NA}	{NA}	{PHI:785; G4NIS9 MGG_04128 318829 Magnaporthe oryzae Rice Blast Oryza sativa (related: rice) Hypothetical protein gene disruption reduced virulence}	{A4R566_MAGO7; MGG_04128 EDJ99431.1 550 Magnaporthe oryzae 242507 Unknown 15846337 XP_361654.2, XM_361654.2 {ID:PF06824; Description: DUF1237} Poaceae, especially important on Oryzae herb Rice blast Rice Blast {ID:0003824; Method: IEA:InterPro; Description: F:catalytic activity}}	{NA}	{NA}	{VWO96882.1_; GH125 exo-alpha-1,6-mannosidase (EC 3.2.1.-) -}	{NA}
A00884	{Contig10:2197757:2200047:+}	{KAG2058870.1; hypothetical protein BDR06DRAFT_950112 [Suillus hirtellus]}	{NA}	{cput:CONPUDRAFT_103096; }	{NA}	{NA}	{GO:0005515; protein binding; molecular_function}	{NA}	{NA}	{NA}	{NA}	{NA}	{PF00168:C2 domain}
A00885	{Contig10:2200428:2203599:-}	{KAG2158853.1; hypothetical protein EDB93DRAFT_1116712 [Suillus bovinus]}	{NA}	{NA}	{NA}	{NA}	{GO:0005515; protein binding; molecular_function}	{NA}	{NA}	{NA}	{NA}	{NA}	{PF00400:WD domain, G-beta repeat}
A00886	{Contig10:2203901:2209876:+}	{KAG1863344.1; hypothetical protein C8R48DRAFT_708056 [Suillus tomentosus]}	{NA}	{NA}	{NA}	{NA}	{GO:0005840; ribosome; cellular_component GO:0006412; translation; biological_process GO:0003735; structural constituent of ribosome; molecular_function}	{NA}	{NA}	{NA}	{NA}	{NA}	{PF00298:Ribosomal protein L11, RNA binding domain}
A00887	{Contig10:2210203:2211347:-}	{KAG2158849.1; hypothetical protein EDB93DRAFT_1076113 [Suillus bovinus]}	{NA}	{sla:SERLADRAFT_460788; }	{NA}	{NA}	{GO:0005856; cytoskeleton; cellular_component}	{NA}	{NA}	{NA}	{NA}	{NA}	{PF00784:MyTH4 domain}
A00888	{Contig10:2211917:2213281:-}	{KAG2158848.1; glycosyl hydrolase catalytic core-domain-containing protein [Suillus bovinus]}	{NA}	{cput:CONPUDRAFT_153090; }	{NA}	{NA}	{NA}	{NA}	{NA}	{NA}	{YES}	{QRV76668.1_; GH128 beta-1,3-glucanase (EC 3.2.1.39); beta-1,3-glucosidase (EC 3.2.1.-) -}	{NA}
A00889	{Contig10:2213854:2216662:+}	{KAG2158847.1; hypothetical protein EDB93DRAFT_1237667 [Suillus bovinus]}	{NA}	{sla:SERLADRAFT_413828; }	{NA}	{NA}	{GO:0003676; nucleic acid binding; molecular_function}	{NA}	{NA}	{NA}	{NA}	{NA}	{PF00076:RNA recognition motif. (a.k.a. RRM, RBD, or RNP domain) PF01585:G-patch domain}
A00890	{Contig10:2216970:2217620:-}	{KAG2158846.1; hypothetical protein EDB93DRAFT_1237666 [Suillus bovinus]}	{NA}	{cput:CONPUDRAFT_136757; }	{NA}	{NA}	{NA}	{NA}	{NA}	{NA}	{NA}	{NA}	{NA}
A00891	{Contig10:241842:242403:+}	{KAG2123259.1; hypothetical protein EDB93DRAFT_1110886 [Suillus bovinus]}	{NA}	{NA}	{NA}	{NA}	{GO:0005737; cytoplasm; cellular_component GO:0006886; intracellular protein transport; biological_process GO:0008565; protein transporter activity; molecular_function GO:0016020; membrane; cellular_component}	{NA}	{NA}	{NA}	{NA}	{NA}	{PF04871:Uso1 / p115 like vesicle tethering protein, C terminal region}
A00892	{Contig10:2218776:2219445:-}	{KAG2158844.1; hypothetical protein EDB93DRAFT_426744 [Suillus bovinus]}	{NA}	{tvs:TRAVEDRAFT_27222; }	{NA}	{NA}	{NA}	{NA}	{NA}	{NA}	{NA}	{NA}	{NA}
A00893	{Contig10:2221062:2222931:+}	{KAG2158843.1; hypothetical protein EDB93DRAFT_1245407 [Suillus bovinus]}	{NA}	{sla:SERLADRAFT_460749; }	{NA}	{NA}	{NA}	{NA}	{NA}	{NA}	{NA}	{NA}	{NA}
A00894	{Contig10:2223200:2223558:-}	{KAG2158842.1; hypothetical protein EDB93DRAFT_1245406 [Suillus bovinus]}	{P10663; 37S ribosomal protein MRP2, mitochondrial }	{sla:SERLADRAFT_360181; K02954 RP-S14, MRPS14, rpsN small subunit ribosomal protein S14 -- Genetic Information Processing; Translation; Ribosome [PATH:ko03010]}	{YPR166c; KOG1741 Mitochondrial/chloroplast ribosomal protein S14/S29 J Translation, ribosomal structure and biogenesis ;}	{NA}	{GO:0005622; intracellular; cellular_component GO:0003735; structural constituent of ribosome; molecular_function GO:0006412; translation; biological_process GO:0005840; ribosome; cellular_component}	{NA}	{NA}	{NA}	{NA}	{NA}	{PF00253:Ribosomal protein S14p/S29e}
A00895	{Contig10:2224314:2227000:-}	{KAG1832962.1; vacuolar amino acid permease [Suillus variegatus]}	{NA}	{cput:CONPUDRAFT_103126; }	{NA}	{NA}	{GO:0055085; transmembrane transport; biological_process GO:0022857; transmembrane transporter activity; molecular_function GO:0016021; integral to membrane; cellular_component}	{NA}	{NA}	{NA}	{NA}	{NA}	{PF07690:Major Facilitator Superfamily PF00083:Sugar (and other) transporter}
A00896	{Contig10:2229858:2232480:+}	{KAG1907376.1; Pkinase-domain-containing protein [Suillus fuscotomentosus]}	{O42626; Serine/threonine-protein kinase nrc-2 }	{cput:CONPUDRAFT_54334; }	{SPAC4G8.05; KOG0610 Putative serine/threonine protein kinase R General function prediction only ;}	{NA}	{GO:0006468; protein phosphorylation; biological_process GO:0004672; protein kinase activity; molecular_function GO:0005524; ATP binding; molecular_function}	{PHI:1177; I1RKH9 nrc-2 5518 Fusarium graminearum Fusarium Ear Blight Triticum (related: wheat) protein kinase gene deletion: full reduced virulence}	{NA}	{NA}	{NA}	{NA}	{PF07714:Protein tyrosine and serine/threonine kinase PF00069:Protein kinase domain}
A00897	{Contig10:2233707:2235702:+}	{KAG2158838.1; HSF-type DNA-binding-domain-containing protein [Suillus bovinus]}	{NA}	{cput:CONPUDRAFT_53933; }	{NA}	{NA}	{GO:0005634; nucleus; cellular_component GO:0003700; sequence-specific DNA binding transcription factor activity; molecular_function GO:0043565; sequence-specific DNA binding; molecular_function GO:0006355; regulation of transcription, DNA-dependent; biological_process}	{NA}	{NA}	{NA}	{NA}	{NA}	{PF00447:HSF-type DNA-binding}
A00898	{Contig10:2236858:2238053:-}	{KAG2158837.1; hypothetical protein EDB93DRAFT_1116580 [Suillus bovinus]}	{NA}	{cput:CONPUDRAFT_53875; }	{NA}	{NA}	{NA}	{NA}	{NA}	{NA}	{NA}	{NA}	{NA}
A00899	{Contig10:2241161:2242612:-}	{KAG2158835.1; hypothetical protein EDB93DRAFT_1075635 [Suillus bovinus]}	{NA}	{cput:CONPUDRAFT_136751; }	{NA}	{gnl|TC-DB|F8NMY0; 1.A.101.3.2 Putative uncharacterized protein OS=Serpula lacrymans var. lacrymans (strain S7.9) GN=SERLADRAFT_460950 PE=4 SV=1}	{GO:0009405; pathogenesis; biological_process GO:0016021; integral to membrane; cellular_component GO:0016559; peroxisome fission; biological_process GO:0005779; integral to peroxisomal membrane; cellular_component}	{NA}	{NA}	{NA}	{NA}	{NA}	{PF14171:Toxin SpoIISA, type II toxin-antitoxin system PF05648:Peroxisomal biogenesis factor 11 (PEX11)}
A00900	{Contig10:2245850:2246456:-}	{KAG1832969.1; hypothetical protein EV424DRAFT_1008469 [Suillus variegatus]}	{NA}	{sla:SERLADRAFT_460069; K15151 MED10, NUT2 mediator of RNA polymerase II transcription subunit 10 -- }	{NA}	{NA}	{GO:0001104; RNA polymerase II transcription cofactor activity; molecular_function GO:0016592; mediator complex; cellular_component GO:0006357; regulation of transcription from RNA polymerase II promoter; biological_process}	{NA}	{NA}	{NA}	{NA}	{NA}	{PF09748:Transcription factor subunit Med10 of Mediator complex}
A00901	{Contig10:2246886:2250844:+}	{OJA20915.1; hypothetical protein AZE42_00892 [Rhizopogon vesiculosus]}	{NA}	{sla:SERLADRAFT_460964; K12844 PRPF31 U4/U6 small nuclear ribonucleoprotein PRP31 -- Genetic Information Processing; Transcription; Spliceosome [PATH:ko03040]}	{NA}	{NA}	{NA}	{NA}	{NA}	{NA}	{NA}	{NA}	{NA}
A00902	{Contig10:30502:33246:-}	{KAG1792311.1; hypothetical protein HD556DRAFT_1444576 [Suillus plorans]}	{NA}	{NA}	{NA}	{NA}	{NA}	{NA}	{NA}	{NA}	{NA}	{NA}	{NA}
A00903	{Contig10:243478:246532:+}	{KAG2123260.1; hypothetical protein EDB93DRAFT_1259155, partial [Suillus bovinus]}	{NA}	{NA}	{NA}	{NA}	{GO:0005515; protein binding; molecular_function}	{NA}	{NA}	{NA}	{NA}	{NA}	{PF08007:Cupin superfamily protein}
A00904	{Contig10:2251098:2251829:-}	{KAG2158830.1; FeS cluster assembly scaffold IscU [Suillus bovinus]}	{Q6CFQ0; Iron sulfur cluster assembly protein 1, mitochondrial }	{cput:CONPUDRAFT_143678; K22068 ISCU iron-sulfur cluster assembly enzyme ISCU, mitochondrial -- }	{SPAC227.13c; KOG3361 Iron binding protein involved in Fe-S cluster formation C Energy production and conversion ;}	{NA}	{GO:0005506; iron ion binding; molecular_function GO:0051536; iron-sulfur cluster binding; molecular_function GO:0016226; iron-sulfur cluster assembly; biological_process}	{PHI:6892; A0A0L9JQ40 iscU 28901 Salmonella enterica Salmonellosis Mus musculus (related: house mouse) Fe-S cluster sensor Gene mutation reduced virulence}	{NA}	{NA}	{NA}	{NA}	{PF01592:NifU-like N terminal domain}
A00905	{Contig10:2252399:2253253:+}	{KAG2158829.1; transcription initiation factor IID, 31kD subunit-domain-containing protein [Suillus bovinus]}	{Q9SYH2; Transcription initiation factor TFIID subunit 9 }	{cput:CONPUDRAFT_103083; K03133 TAF9B, TAF9 transcription initiation factor TFIID subunit 9B -- Genetic Information Processing; Transcription; Basal transcription factors [PATH:ko03022] Human Diseases; Infectious diseases: Viral; Herpes simplex infection [PATH:ko05168]}	{At1g54140; KOG3334 Transcription initiation factor TFIID, subunit TAF9 (also component of histone acetyltransferase SAGA) K Transcription ;}	{NA}	{GO:0019074; viral RNA genome packaging; biological_process GO:0019013; viral nucleocapsid; cellular_component GO:0003700; sequence-specific DNA binding transcription factor activity; molecular_function GO:0003677; DNA binding; molecular_function GO:0006351; transcription, DNA-dependent; biological_process GO:0003887; DNA-directed DNA polymerase activity; molecular_function GO:0016987; sigma fact…	{NA}	{NA}	{NA}	{NA}	{NA}	{PF00125:Core histone H2A/H2B/H3/H4 PF04546:Sigma-70, non-essential region PF02291:Transcription initiation factor IID, 31kD subunit PF05505:Ebola nucleoprotein PF04931:DNA polymerase phi}
A00906	{Contig10:2253398:2255191:-}	{KAG2158828.1; WD40-repeat-containing domain protein [Suillus bovinus]}	{NA}	{sla:SERLADRAFT_460972; K14003 PREB, SEC12 prolactin regulatory element-binding protein -- Genetic Information Processing; Folding, sorting and degradation; Protein processing in endoplasmic reticulum [PATH:ko04141]}	{NA}	{NA}	{GO:0005515; protein binding; molecular_function}	{NA}	{NA}	{NA}	{NA}	{NA}	{PF00400:WD domain, G-beta repeat}
A00907	{Contig10:2255669:2260307:+}	{KAG2158826.1; kinase-like domain-containing protein [Suillus bovinus]}	{O94547; Serine/threonine-protein kinase srk1 }	{sla:SERLADRAFT_460976; }	{SPCC1322.08; KOG0032 Ca2+/calmodulin-dependent protein kinase, EF-Hand protein superfamily T Signal transduction mechanisms ;}	{NA}	{GO:0005524; ATP binding; molecular_function GO:0006817; phosphate transport; biological_process GO:0006468; protein phosphorylation; biological_process GO:0005737; cytoplasm; cellular_component GO:0005852; eukaryotic translation initiation factor 3 complex; cellular_component GO:0016021; integral to membrane; cellular_component GO:0003743; translation initiation factor activity; molecular_functi…	{PHI:1249; I1RB79 FGSG_00786 5518 Fusarium graminearum Fusarium Ear Blight Triticum (related: wheat) protein kinase gene deletion: full unaffected pathogenicity}	{NA}	{NA}	{NA}	{NA}	{PF03153:Transcription factor IIA, alpha/beta subunit PF05653:Magnesium transporter NIPA PF06459:Ryanodine Receptor TM 4-6 PF12090:Spt20 family PF00892:EamA-like transporter family PF05091:Eukaryotic translation initiation factor 3 subunit 7 (eIF-3) PF01163:RIO1 family PF01384:Phosphate transporter family PF07714:Protein tyrosine and serine/threonine kinase PF00069:Protein kinase domain}
A00908	{Contig10:2260790:2263198:-}	{KAG2158825.1; hypothetical protein EDB93DRAFT_1116522 [Suillus bovinus]}	{NA}	{cput:CONPUDRAFT_123376; }	{NA}	{NA}	{GO:0005524; ATP binding; molecular_function}	{NA}	{NA}	{NA}	{NA}	{NA}	{PF00004:ATPase family associated with various cellular activities (AAA)}
A00909	{Contig10:2263670:2269735:+}	{KAG2158822.1; hypothetical protein EDB93DRAFT_424705 [Suillus bovinus]}	{NA}	{sla:SERLADRAFT_446721; K00380 cysJ sulfite reductase (NADPH) flavoprotein alpha-component 1.8.1.2 Metabolism; Energy metabolism; Sulfur metabolism [PATH:ko00920] Metabolism; Global and overview maps; Metabolic pathways [PATH:ko01100] Metabolism; Global and overview maps; Microbial metabolism in diverse environments [PATH:ko01120]}	{NA}	{NA}	{GO:0008168; methyltransferase activity; molecular_function GO:0008152; NA GO:0016491; oxidoreductase activity; molecular_function GO:0055114; oxidation-reduction process; biological_process}	{NA}	{NA}	{NA}	{NA}	{NA}	{PF08241:Methyltransferase domain PF00175:Oxidoreductase NAD-binding domain PF05148:Hypothetical methyltransferase PF00667:FAD binding domain}
A00910	{Contig10:2270384:2272589:-}	{KAG2158821.1; glycoside hydrolase family 9 protein [Suillus bovinus]}	{NA}	{sla:SERLADRAFT_360197; K01179 E3.2.1.4 endoglucanase 3.2.1.4 Metabolism; Carbohydrate metabolism; Starch and sucrose metabolism [PATH:ko00500] Metabolism; Global and overview maps; Metabolic pathways [PATH:ko01100]}	{NA}	{NA}	{GO:0005975; carbohydrate metabolic process; biological_process GO:0004553; hydrolase activity, hydrolyzing O-glycosyl compounds; molecular_function}	{NA}	{NA}	{NA}	{NA}	{QRV91361.1_; GH9 endoglucanase (EC 3.2.1.4); endo-beta-1,3(4)-glucanase / lichenase-laminarinase (EC 3.2.1.6); lichenase / endo-beta-1,3-1,4-glucanase (EC 3.2.1.73); exo-beta-1,4-glucanase / cellodextrinase (EC 3.2.1.74); cellobiohydrolase (EC 3.2.1.91); xyloglucan-specific endo-beta-1,4-glucanase / endo-xyloglucanase (EC 3.2.1.151); exo-beta-glucosaminidase (EC 3.2.1.165); endo-beta-1,4-glucana…	{PF00759:Glycosyl hydrolase family 9}
A00911	{Contig10:2272886:2274214:+}	{KAG2158820.1; hypothetical protein EDB93DRAFT_423937 [Suillus bovinus]}	{NA}	{sla:SERLADRAFT_460990; }	{NA}	{NA}	{GO:0055114; oxidation-reduction process; biological_process GO:0008152; NA GO:0016491; oxidoreductase activity; molecular_function}	{NA}	{NA}	{NA}	{NA}	{NA}	{PF02894:Oxidoreductase family, C-terminal alpha/beta domain PF01408:Oxidoreductase family, NAD-binding Rossmann fold}
A00912	{Contig10:2278260:2280016:+}	{KAG1863382.1; hypothetical protein C8R48DRAFT_773423 [Suillus tomentosus]}	{NA}	{sla:SERLADRAFT_460822; }	{NA}	{NA}	{GO:0005515; protein binding; molecular_function}	{NA}	{NA}	{NA}	{NA}	{NA}	{PF00240:Ubiquitin family}
A00913	{Contig10:2280152:2281381:-}	{KAG2158817.1; hypothetical protein EDB93DRAFT_1076281 [Suillus bovinus]}	{NA}	{cput:CONPUDRAFT_165031; K14546 UTP5, WDR43 U3 small nucleolar RNA-associated protein 5 -- Genetic Information Processing; Translation; Ribosome biogenesis in eukaryotes [PATH:ko03008]}	{NA}	{NA}	{GO:0006364; rRNA processing; biological_process GO:0005730; nucleolus; cellular_component}	{NA}	{NA}	{NA}	{NA}	{NA}	{PF09384:UTP15 C terminal}
A00914	{Contig10:247529:249302:-}	{KAG2126342.1; hypothetical protein EDB93DRAFT_1274406 [Suillus bovinus]}	{NA}	{NA}	{NA}	{NA}	{GO:0004190; aspartic-type endopeptidase activity; molecular_function GO:0032040; small-subunit processome; cellular_component GO:0005634; nucleus; cellular_component GO:0003677; DNA binding; molecular_function GO:0016772; transferase activity, transferring phosphorus-containing groups; molecular_function GO:0000398; nuclear mRNA splicing, via spliceosome; biological_process GO:0000775; chromosom…	{NA}	{NA}	{NA}	{NA}	{NA}	{PF03286:Pox virus Ag35 surface protein PF04147:Nop14-like family PF07959:L-fucokinase PF01080:Presenilin PF09507:DNA polymerase subunit Cdc27 PF04889:Cwf15/Cwc15 cell cycle control protein PF02724:CDC45-like protein PF09026:Centromere protein B dimerisation domain}
A00915	{Contig10:2281885:2283356:+}	{KAG1863384.1; kinase-like domain-containing protein [Suillus tomentosus]}	{Q9HGY5; Negative regulator of the PHO system }	{cput:CONPUDRAFT_103586; }	{SPCC16C4.11; KOG0594 Protein kinase PCTAIRE and related kinases R General function prediction only ;}	{gnl|TC-DB|P06493; 1.I.1.1.3 Cyclin-dependent kinase 1 OS=Homo sapiens GN=CDK1 PE=1 SV=3}	{GO:0016592; mediator complex; cellular_component GO:0006468; protein phosphorylation; biological_process GO:0004672; protein kinase activity; molecular_function GO:0001104; RNA polymerase II transcription cofactor activity; molecular_function GO:0005524; ATP binding; molecular_function GO:0006357; regulation of transcription from RNA polymerase II promoter; biological_process}	{PHI:1223; I1RN31 FGSG_05393 5518 Fusarium graminearum Fusarium Ear Blight Triticum (related: wheat) protein kinase gene deletion: full lethal}	{A3LXZ6_PICST; CDC28 ABN67890.1 310 Scheffersomyces stipitis 322104 Unknown 17334359 XP_001385919.1, XM_001385882.1 {ID:PF00069; Description: Pkinase} humans vertebrata occasional infection Occasional Infection {ID:0005524; Method: IEA:UniProtKB-KW; Description: F:ATP binding} {ID:0004674; Method: IEA:InterPro; Description: F:protein serine/threonine kinase activity} {ID:0051301; Method: IEA:UniP…	{NA}	{NA}	{NA}	{PF00069:Protein kinase domain PF09606:ARC105 or Med15 subunit of Mediator complex non-fungal PF07714:Protein tyrosine and serine/threonine kinase}
A00916	{Contig10:2283901:2287375:+}	{KAG2369952.1; hypothetical protein BDR07DRAFT_1456362, partial [Suillus spraguei]}	{NA}	{sla:SERLADRAFT_446656; K04739 PRKAR cAMP-dependent protein kinase regulator -- Organismal Systems; Endocrine system; Insulin signaling pathway [PATH:ko04910]}	{NA}	{NA}	{GO:0015031; protein transport; biological_process GO:0016020; membrane; cellular_component}	{PHI:128__PHI:6818; NA}	{NA}	{NA}	{NA}	{NA}	{PF00344:SecY}
A00917	{Contig10:2287769:2290204:-}	{KAG1820329.1; major facilitator superfamily domain-containing protein [Suillus subaureus]}	{O43000; Pantothenate transporter liz1 }	{sla:SERLADRAFT_354736; K03448 FEN2, LIZ1 MFS transporter, ACS family, pantothenate transporter -- }	{SPBC2G2.01c; KOG2533 Permease of the major facilitator superfamily G Carbohydrate transport and metabolism ;}	{gnl|TC-DB|O43000; 2.A.1.14.17 Pantothenate transporter liz1 - Schizosaccharomyces pombe (Fission yeast).}	{GO:0016021; integral to membrane; cellular_component GO:0055085; transmembrane transport; biological_process}	{NA}	{NA}	{NA}	{NA}	{NA}	{PF07690:Major Facilitator Superfamily}
A00918	{Contig10:2290612:2292836:+}	{KAG1863389.1; hypothetical protein C8R48DRAFT_708219 [Suillus tomentosus]}	{NA}	{sla:SERLADRAFT_460841; }	{NA}	{NA}	{NA}	{NA}	{NA}	{NA}	{NA}	{NA}	{NA}
A00919	{Contig10:2293157:2293788:-}	{KAG2158810.1; RNA polymerase I [Suillus bovinus]}	{P20436; DNA-directed RNA polymerases I, II, and III subunit RPABC3 }	{cput:CONPUDRAFT_133976; K03016 RPB8, POLR2H DNA-directed RNA polymerases I, II, and III subunit RPABC3 -- Metabolism; Nucleotide metabolism; Purine metabolism [PATH:ko00230] Metabolism; Nucleotide metabolism; Pyrimidine metabolism [PATH:ko00240] Metabolism; Global and overview maps; Metabolic pathways [PATH:ko01100] Genetic Information Processing; Transcription; RNA polymerase [PATH:ko03020] Org…	{YOR224c; KOG3400 RNA polymerase subunit 8 K Transcription ;}	{NA}	{GO:0006351; transcription, DNA-dependent; biological_process}	{NA}	{NA}	{NA}	{NA}	{NA}	{PF03870:RNA polymerase Rpb8}
A00920	{Contig10:2293937:2295298:-}	{KAG2158809.1; para-hydroxybenzoate-polyprenyltransferase [Suillus bovinus]}	{Q298G6; 4-hydroxybenzoate polyprenyltransferase, mitochondrial }	{dsq:DICSQDRAFT_112919; K06125 COQ2 4-hydroxybenzoate polyprenyltransferase 2.5.1.39 Metabolism; Metabolism of cofactors and vitamins; Ubiquinone and other terpenoid-quinone biosynthesis [PATH:ko00130] Metabolism; Global and overview maps; Metabolic pathways [PATH:ko01100] Metabolism; Global and overview maps; Biosynthesis of secondary metabolites [PATH:ko01110]}	{7299020; KOG1381 Para-hydroxybenzoate-polyprenyl transferase H Coenzyme transport and metabolism ;}	{NA}	{GO:0016021; integral to membrane; cellular_component GO:0004659; prenyltransferase activity; molecular_function}	{NA}	{NA}	{NA}	{NA}	{NA}	{PF01040:UbiA prenyltransferase family}
A00921	{Contig10:2296106:2299509:-}	{KAG1820324.1; hypothetical protein BJ212DRAFT_1478452 [Suillus subaureus]}	{NA}	{cput:CONPUDRAFT_138372; }	{NA}	{NA}	{GO:0005737; cytoplasm; cellular_component GO:0005094; Rho GDP-dissociation inhibitor activity; molecular_function GO:0046872; metal ion binding; molecular_function}	{NA}	{NA}	{NA}	{NA}	{NA}	{PF00642:Zinc finger C-x8-C-x5-C-x3-H type (and similar) PF02115:RHO protein GDP dissociation inhibitor}
A00922	{Contig10:2300028:2301668:-}	{KAG2158806.1; hypothetical protein EDB93DRAFT_422416 [Suillus bovinus]}	{NA}	{gtr:GLOTRDRAFT_125643; }	{NA}	{NA}	{GO:0046872; metal ion binding; molecular_function}	{NA}	{NA}	{NA}	{NA}	{NA}	{PF00642:Zinc finger C-x8-C-x5-C-x3-H type (and similar)}
A00923	{Contig10:2303739:2305694:+}	{KAG2158805.1; hypothetical protein EDB93DRAFT_422666 [Suillus bovinus]}	{NA}	{cput:CONPUDRAFT_89848; }	{NA}	{NA}	{NA}	{NA}	{NA}	{NA}	{NA}	{NA}	{NA}
A00924	{Contig10:2305879:2306868:-}	{KAG2118882.1; Alpha/Beta hydrolase protein [Suillus discolor]}	{NA}	{sla:SERLADRAFT_460855; }	{NA}	{NA}	{NA}	{NA}	{NA}	{NA}	{NA}	{NA}	{NA}
A00925	{Contig10:253881:255087:-}	{KAG2126334.1; hypothetical protein EDB93DRAFT_1109701 [Suillus bovinus]}	{NA}	{NA}	{NA}	{NA}	{GO:0005515; protein binding; molecular_function}	{NA}	{NA}	{NA}	{NA}	{NA}	{PF00856:SET domain}
A00926	{Contig10:2309085:2310675:-}	{KAG2158803.1; hypothetical protein EDB93DRAFT_1237632 [Suillus bovinus]}	{NA}	{sla:SERLADRAFT_460858; }	{NA}	{NA}	{GO:0005524; ATP binding; molecular_function GO:0008152; NA GO:0016491; oxidoreductase activity; molecular_function GO:0009029; tetraacyldisaccharide 4'-kinase activity; molecular_function GO:0055114; oxidation-reduction process; biological_process GO:0009245; lipid A biosynthetic process; biological_process}	{NA}	{NA}	{NA}	{NA}	{NA}	{PF02894:Oxidoreductase family, C-terminal alpha/beta domain PF02606:Tetraacyldisaccharide-1-P 4'-kinase PF01408:Oxidoreductase family, NAD-binding Rossmann fold}
A00927	{Contig10:2310939:2312425:+}	{KAG2158802.1; hypothetical protein EDB93DRAFT_1076106 [Suillus bovinus]}	{NA}	{sla:SERLADRAFT_435215; }	{NA}	{NA}	{NA}	{NA}	{NA}	{NA}	{NA}	{NA}	{NA}
A00928	{Contig10:2312531:2313514:-}	{KAG2042985.1; nucleophile aminohydrolase [Suillus americanus]}	{Q55GJ6; Proteasome subunit beta type-6 }	{sla:SERLADRAFT_360169; K02738 PSMB6 20S proteasome subunit beta 1 3.4.25.1 Genetic Information Processing; Folding, sorting and degradation; Proteasome [PATH:ko03050]}	{YJL001w; KOG0174 20S proteasome, regulatory subunit beta type PSMB6/PSMB9/PRE3 O Posttranslational modification, protein turnover, chaperones ;}	{NA}	{GO:0051603; proteolysis involved in cellular protein catabolic process; biological_process GO:0005839; proteasome core complex; cellular_component GO:0004298; threonine-type endopeptidase activity; molecular_function}	{NA}	{NA}	{NA}	{NA}	{NA}	{PF00227:Proteasome subunit}
A00929	{Contig10:2313665:2314710:+}	{KAG2158800.1; SAC3/GANP/Nin1/mts3/eIF-3 p25 family-domain-containing protein [Suillus bovinus]}	{Q3SYT7; 26S proteasome non-ATPase regulatory subunit 8 }	{cput:CONPUDRAFT_123335; K03031 PSMD8, RPN12 26S proteasome regulatory subunit N12 -- Genetic Information Processing; Folding, sorting and degradation; Proteasome [PATH:ko03050] Human Diseases; Infectious diseases: Viral; Epstein-Barr virus infection [PATH:ko05169]}	{Hs4506233; KOG3151 26S proteasome regulatory complex, subunit RPN12/PSMD8 O Posttranslational modification, protein turnover, chaperones ;}	{NA}	{NA}	{NA}	{NA}	{NA}	{NA}	{NA}	{NA}
A00930	{Contig10:2314787:2315849:-}	{KAG2754626.1; N-terminal nucleophile aminohydrolase [Suillus luteus UH-Slu-Lm8-n1|Suillus brevipes Sb2]}	{P90513; Proteasome subunit alpha type-3 (Fragment) }	{cput:CONPUDRAFT_89844; K02727 PSMA3 20S proteasome subunit alpha 7 3.4.25.1 Genetic Information Processing; Folding, sorting and degradation; Proteasome [PATH:ko03050]}	{At2g27020; KOG0184 20S proteasome, regulatory subunit alpha type PSMA3/PRE10 O Posttranslational modification, protein turnover, chaperones ;}	{NA}	{GO:0005839; proteasome core complex; cellular_component GO:0004298; threonine-type endopeptidase activity; molecular_function GO:0006511; ubiquitin-dependent protein catabolic process; biological_process GO:0004175; endopeptidase activity; molecular_function GO:0051603; proteolysis involved in cellular protein catabolic process; biological_process GO:0019773; proteasome core complex, alpha-subun…	{NA}	{NA}	{NA}	{NA}	{NA}	{PF00227:Proteasome subunit PF10584:Proteasome subunit A N-terminal signature}
A00931	{Contig10:2316050:2318961:+}	{KAG2158798.1; hypothetical protein EDB93DRAFT_1116346 [Suillus bovinus]}	{NA}	{sla:SERLADRAFT_446672; K18719 NUP82 nucleoporin NUP82 -- }	{NA}	{NA}	{GO:0006886; intracellular protein transport; biological_process GO:0005737; cytoplasm; cellular_component GO:0016020; membrane; cellular_component GO:0008565; protein transporter activity; molecular_function GO:0015743; malate transport; biological_process}	{NA}	{NA}	{NA}	{NA}	{NA}	{PF11744:Aluminium activated malate transporter PF04871:Uso1 / p115 like vesicle tethering protein, C terminal region}
A00932	{Contig10:2319182:2322780:-}	{KAG2158797.1; P-loop containing nucleoside triphosphate hydrolase protein [Suillus bovinus]}	{Q4PFD9; Pre-mRNA-processing ATP-dependent RNA helicase PRP5 }	{abv:AGABI2DRAFT191977; K12811 DDX46, PRP5 ATP-dependent RNA helicase DDX46/PRP5 3.6.4.13 Genetic Information Processing; Transcription; Spliceosome [PATH:ko03040]}	{SPCC10H11.01; KOG0334 RNA helicase A RNA processing and modification ;}	{NA}	{GO:0008026; ATP-dependent helicase activity; molecular_function GO:0004386; helicase activity; molecular_function GO:0005524; ATP binding; molecular_function GO:0003676; nucleic acid binding; molecular_function GO:0016787; hydrolase activity; molecular_function GO:0003677; DNA binding; molecular_function}	{NA}	{NA}	{NA}	{NA}	{QKX56076.1_; GH51 endoglucanase (EC 3.2.1.4); endo-beta-1,4-xylanase (EC 3.2.1.8); beta-xylosidase (EC 3.2.1.37); alpha-L-arabinofuranosidase (EC 3.2.1.55); lichenase / endo-beta-1,3-1,4-glucanase (EC 3.2.1.73) -}	{PF00270:DEAD/DEAH box helicase PF04851:Type III restriction enzyme, res subunit PF00271:Helicase conserved C-terminal domain}
A00933	{Contig10:2322935:2325296:+}	{OJA17013.1; hypothetical protein AZE42_00546 [Rhizopogon vesiculosus]}	{NA}	{cput:CONPUDRAFT_165018; }	{NA}	{NA}	{NA}	{NA}	{NA}	{NA}	{NA}	{NA}	{NA}
A00934	{Contig10:2325561:2329107:-}	{KAG1833009.1; hypothetical protein EV424DRAFT_1342041 [Suillus variegatus]}	{NA}	{mrr:Moror_17547; }	{NA}	{NA}	{GO:0046872; metal ion binding; molecular_function GO:0005515; protein binding; molecular_function GO:0008270; zinc ion binding; molecular_function}	{NA}	{NA}	{NA}	{NA}	{NA}	{PF13606:Ankyrin repeat PF01363:FYVE zinc finger PF13639:Ring finger domain PF00023:Ankyrin repeat PF01428:AN1-like Zinc finger}
A00935	{Contig10:2330596:2331448:+}	{KAG2158793.1; hypothetical protein EDB93DRAFT_1245362 [Suillus bovinus]}	{NA}	{NA}	{NA}	{NA}	{NA}	{NA}	{NA}	{NA}	{NA}	{NA}	{NA}
A00936	{Contig10:256019:257486:+}	{KAG2048920.1; hypothetical protein BDR06DRAFT_1012566 [Suillus hirtellus]}	{NA}	{NA}	{NA}	{NA}	{NA}	{NA}	{NA}	{NA}	{NA}	{NA}	{NA}
A00937	{Contig10:2333875:2334750:-}	{KAG2158791.1; hypothetical protein EDB93DRAFT_1245360 [Suillus bovinus]}	{NA}	{NA}	{NA}	{NA}	{NA}	{NA}	{NA}	{NA}	{NA}	{NA}	{NA}
A00938	{Contig10:2336593:2340419:-}	{KAF8693830.1; hypothetical protein AX14_002266 [Amanita brunnescens Koide BX004]}	{NA}	{NA}	{NA}	{NA}	{GO:0046983; protein dimerization activity; molecular_function}	{NA}	{NA}	{NA}	{NA}	{NA}	{PF05699:hAT family C-terminal dimerisation region}
A00939	{Contig10:2340808:2341161:+}	{KAG2029134.1; hypothetical protein BDR03DRAFT_1018859 [Suillus americanus]}	{NA}	{NA}	{NA}	{NA}	{NA}	{NA}	{NA}	{NA}	{NA}	{NA}	{NA}
A00940	{Contig10:2343973:2345453:-}	{KAG2123778.1; hypothetical protein EDB93DRAFT_1292724 [Suillus bovinus]}	{NA}	{lbc:LACBIDRAFT_316760; }	{NA}	{NA}	{GO:0003700; sequence-specific DNA binding transcription factor activity; molecular_function GO:0045892; negative regulation of transcription, DNA-dependent; biological_process}	{NA}	{NA}	{NA}	{NA}	{NA}	{PF08360:QacR-like protein, C-terminal region}
A00941	{Contig10:2346809:2349510:+}	{KAG2114440.1; hypothetical protein BD769DRAFT_1753932 [Suillus cothurnatus]}	{NA}	{NA}	{NA}	{NA}	{GO:0004674; protein serine/threonine kinase activity; molecular_function GO:0006468; protein phosphorylation; biological_process GO:0005524; ATP binding; molecular_function}	{NA}	{NA}	{NA}	{NA}	{NA}	{PF02816:Alpha-kinase family}
A00942	{Contig10:2350532:2354315:-}	{NA}	{NA}	{NA}	{NA}	{NA}	{GO:0008270; zinc ion binding; molecular_function GO:0003676; nucleic acid binding; molecular_function GO:0015074; DNA integration; biological_process GO:0006352; transcription initiation, DNA-dependent; biological_process GO:0005669; transcription factor TFIID complex; cellular_component}	{NA}	{NA}	{NA}	{NA}	{NA}	{PF00665:Integrase core domain PF00098:Zinc knuckle PF05236:Transcription initiation factor TFIID component TAF4 family}
A00943	{Contig10:2355367:2358726:+}	{KAG2135953.1; pyridoxal phosphate-dependent transferase [Suillus bovinus]}	{O14209; Uncharacterized aminotransferase C6B12.04c }	{cput:CONPUDRAFT_89836; K14264 BNA3 kynurenine aminotransferase 2.6.1.7 Metabolism; Amino acid metabolism; Tryptophan metabolism [PATH:ko00380] Metabolism; Global and overview maps; Metabolic pathways [PATH:ko01100]}	{SPAC6B12.04c; KOG0256 1-aminocyclopropane-1-carboxylate synthase, and related proteins T Signal transduction mechanisms ;}	{NA}	{GO:0016829; lyase activity; molecular_function GO:0006520; cellular amino acid metabolic process; biological_process GO:0006888; ER to Golgi vesicle-mediated transport; biological_process GO:0009058; biosynthetic process; biological_process GO:0008152; NA GO:0005622; intracellular; cellular_component GO:0030170; pyridoxal phosphate binding; molecular_function}	{NA}	{NA}	{NA}	{NA}	{NA}	{PF00155:Aminotransferase class I and II PF04628:Sedlin, N-terminal conserved region PF01212:Beta-eliminating lyase PF00266:Aminotransferase class-V PF01053:Cys/Met metabolism PLP-dependent enzyme}
A00944	{Contig10:2358784:2364757:-}	{KAG2118869.1; Sec63-domain-containing protein [Suillus discolor]}	{NA}	{tvs:TRAVEDRAFT_69651; K18664 SLH1 antiviral helicase SLH1 3.6.4.13 }	{NA}	{NA}	{GO:0008026; ATP-dependent helicase activity; molecular_function GO:0004386; helicase activity; molecular_function GO:0005524; ATP binding; molecular_function GO:0016787; hydrolase activity; molecular_function GO:0003676; nucleic acid binding; molecular_function GO:0003677; DNA binding; molecular_function}	{NA}	{NA}	{NA}	{NA}	{NA}	{PF00270:DEAD/DEAH box helicase PF00580:UvrD/REP helicase N-terminal domain PF00271:Helicase conserved C-terminal domain PF04851:Type III restriction enzyme, res subunit}
A00945	{Contig10:2365237:2365866:+}	{KAG2135951.1; hypothetical protein EDB93DRAFT_1092120 [Suillus bovinus]}	{NA}	{lbc:LACBIDRAFT_313263; }	{NA}	{NA}	{GO:0005525; GTP binding; molecular_function}	{NA}	{NA}	{NA}	{NA}	{NA}	{PF01926:50S ribosome-binding GTPase PF00025:ADP-ribosylation factor family}
A00946	{Contig10:2367825:2372558:-}	{THH13272.1; hypothetical protein EW146_g6922 [Bondarzewia mesenterica]}	{NA}	{tvs:TRAVEDRAFT_142829; }	{NA}	{NA}	{GO:0016598; protein arginylation; biological_process GO:0004057; arginyltransferase activity; molecular_function GO:0005515; protein binding; molecular_function}	{NA}	{NA}	{NA}	{NA}	{NA}	{PF04377:Arginine-tRNA-protein transferase, C terminus PF00400:WD domain, G-beta repeat PF04376:Arginine-tRNA-protein transferase, N terminus}
A00947	{Contig10:257859:258257:-}	{KAG2126340.1; hypothetical protein EDB93DRAFT_1257584 [Suillus bovinus]}	{NA}	{NA}	{NA}	{NA}	{NA}	{NA}	{NA}	{NA}	{NA}	{NA}	{NA}
A00948	{Contig10:2372885:2374324:-}	{KAG2135947.1; hypothetical protein EDB93DRAFT_1170405 [Suillus bovinus]}	{NA}	{cput:CONPUDRAFT_136908; }	{NA}	{NA}	{NA}	{NA}	{NA}	{NA}	{NA}	{NA}	{NA}
[truncated: 10,251 more rows]

## Sheet: S5
Table S5. Distribution of CAZyme in S. bovinus and the other 14 fungi
[truncated: 81 more rows]
[truncated: 101 more columns]
