# Supplementary figures and images for: Chromosome-Level Assembly and Comparative Genomic Analysis of Suillus bovinus Provides Insights into the Mechanism of Mycorrhizal Symbiosis
Source: MDPI journal article supplement (doi:10.3390/jof10030211), 2024-03-13

## TERPENOID BACKBONE BIOSYNTHESIS

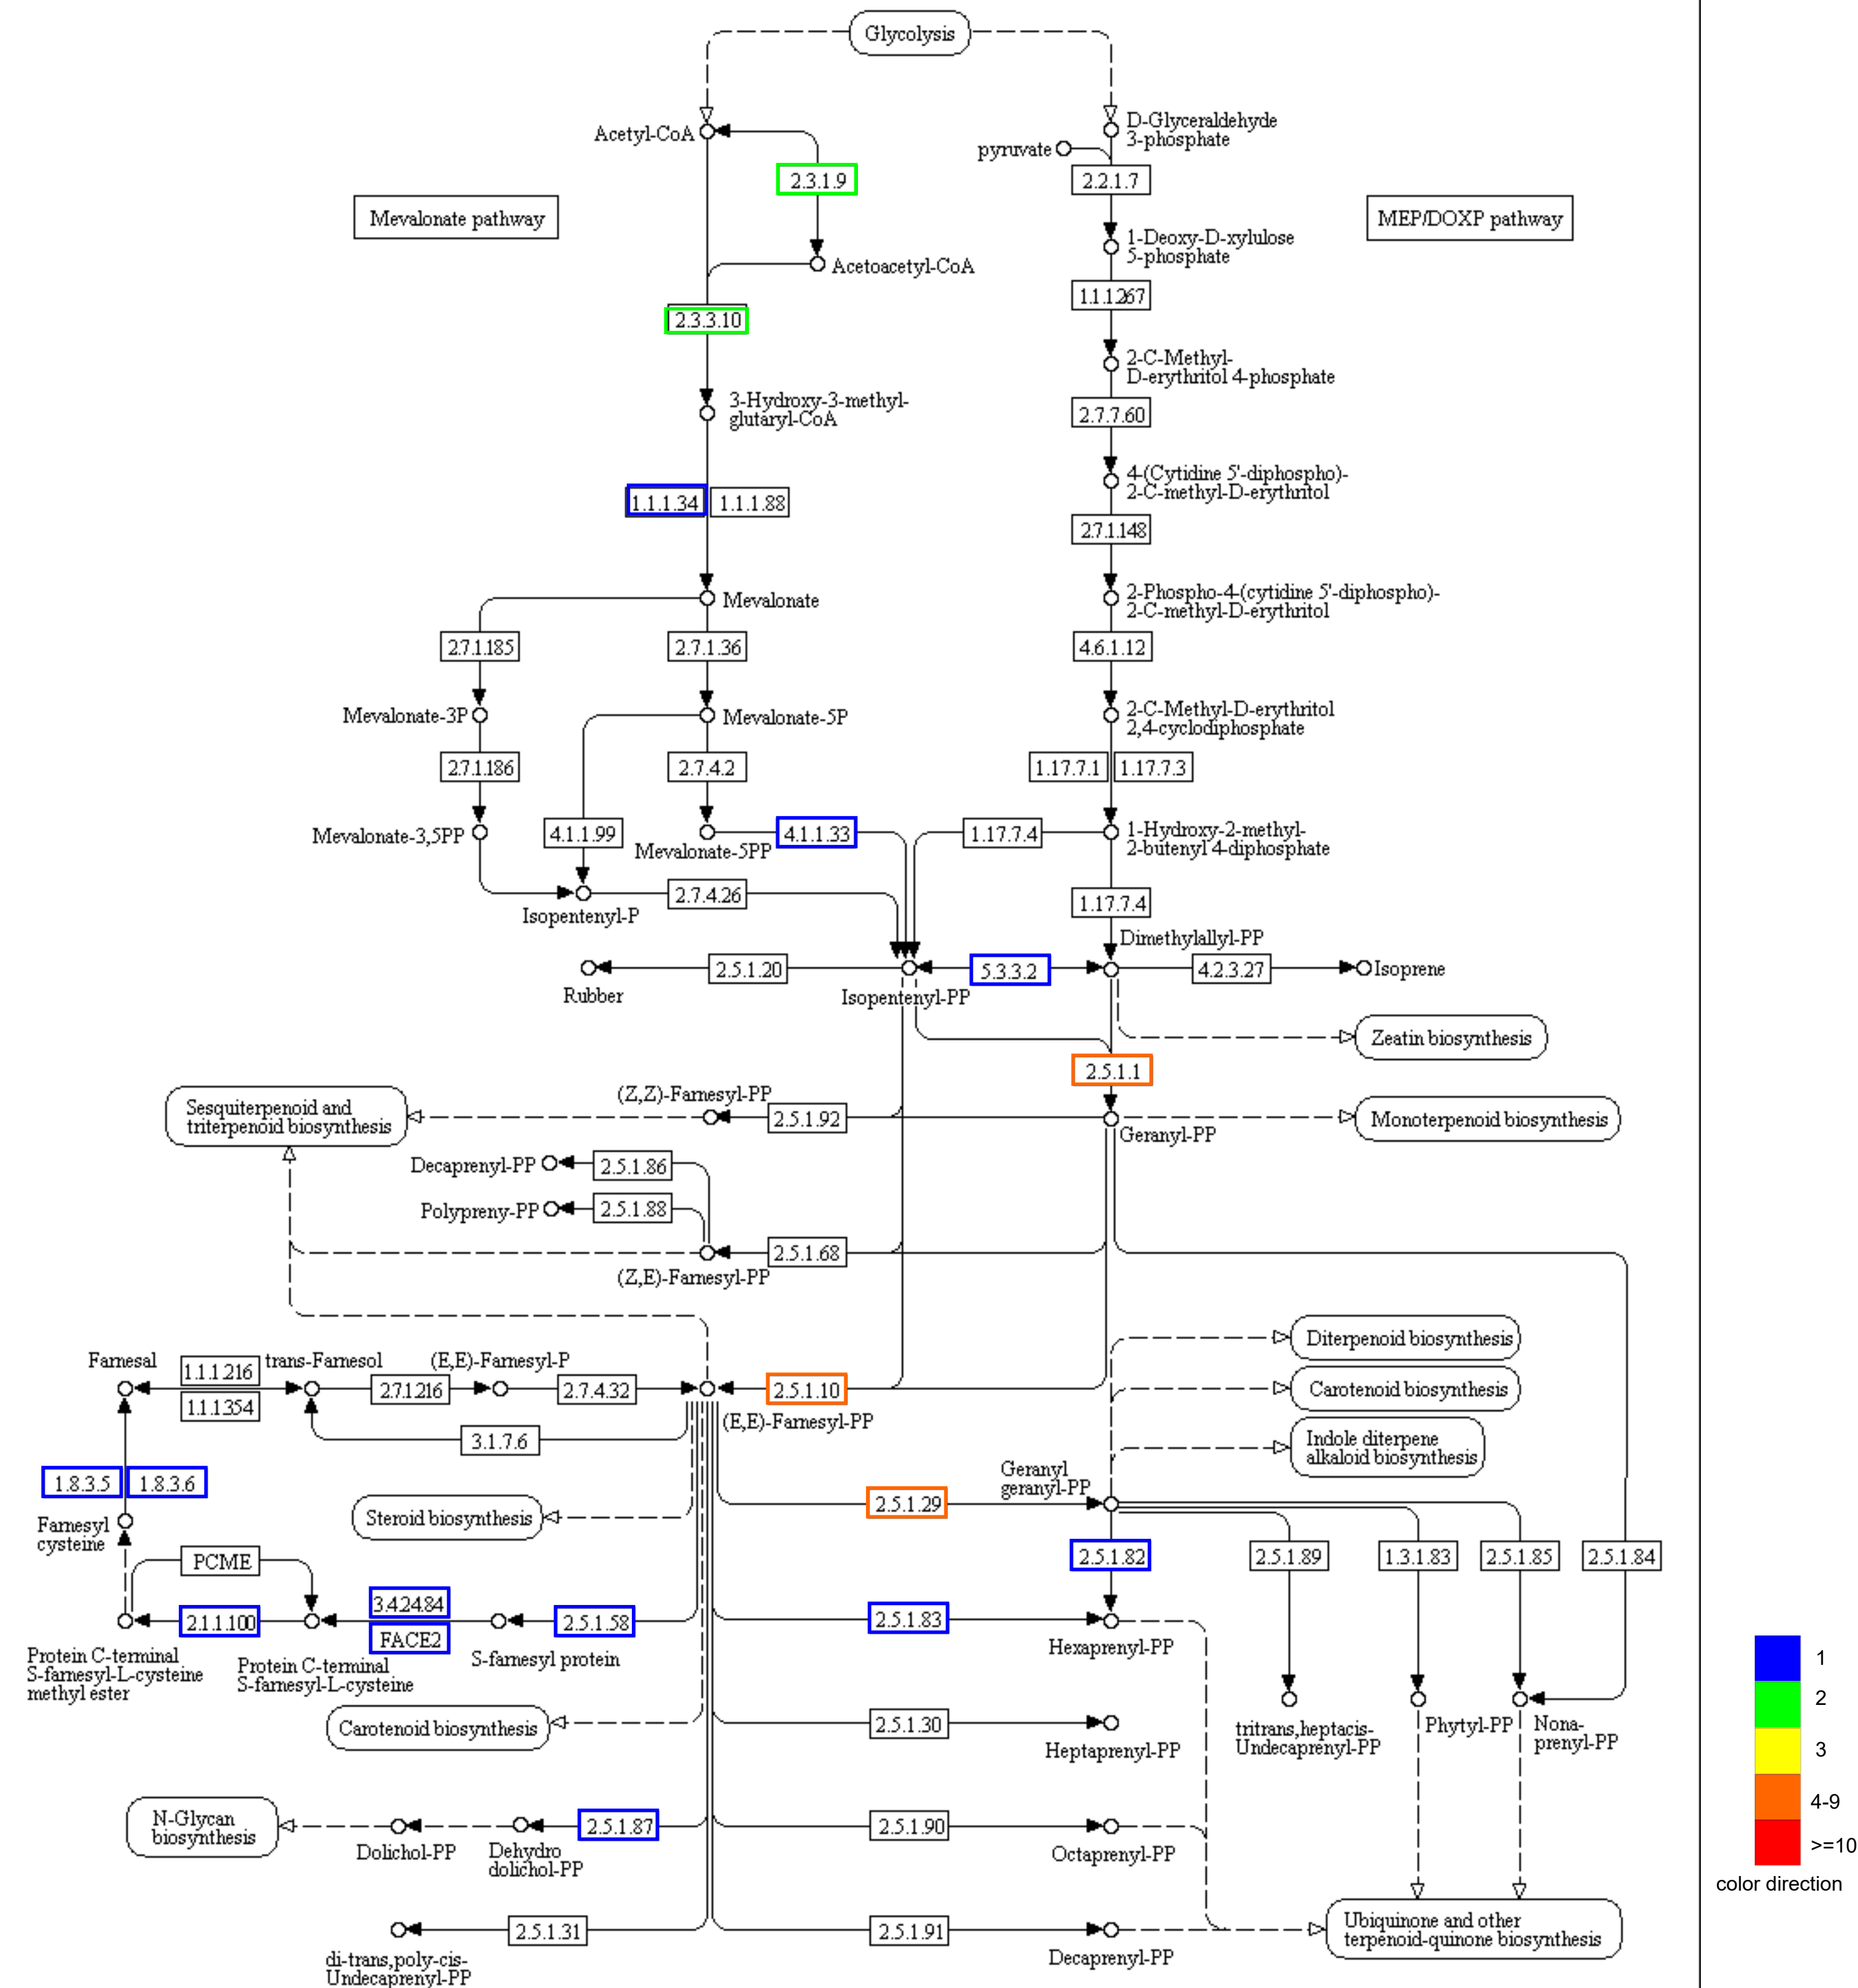

Supplement: s1 [file s1]

## UBIQUINONE AND OTHER TERPENOID-QUINONE BIOSYNTHESIS

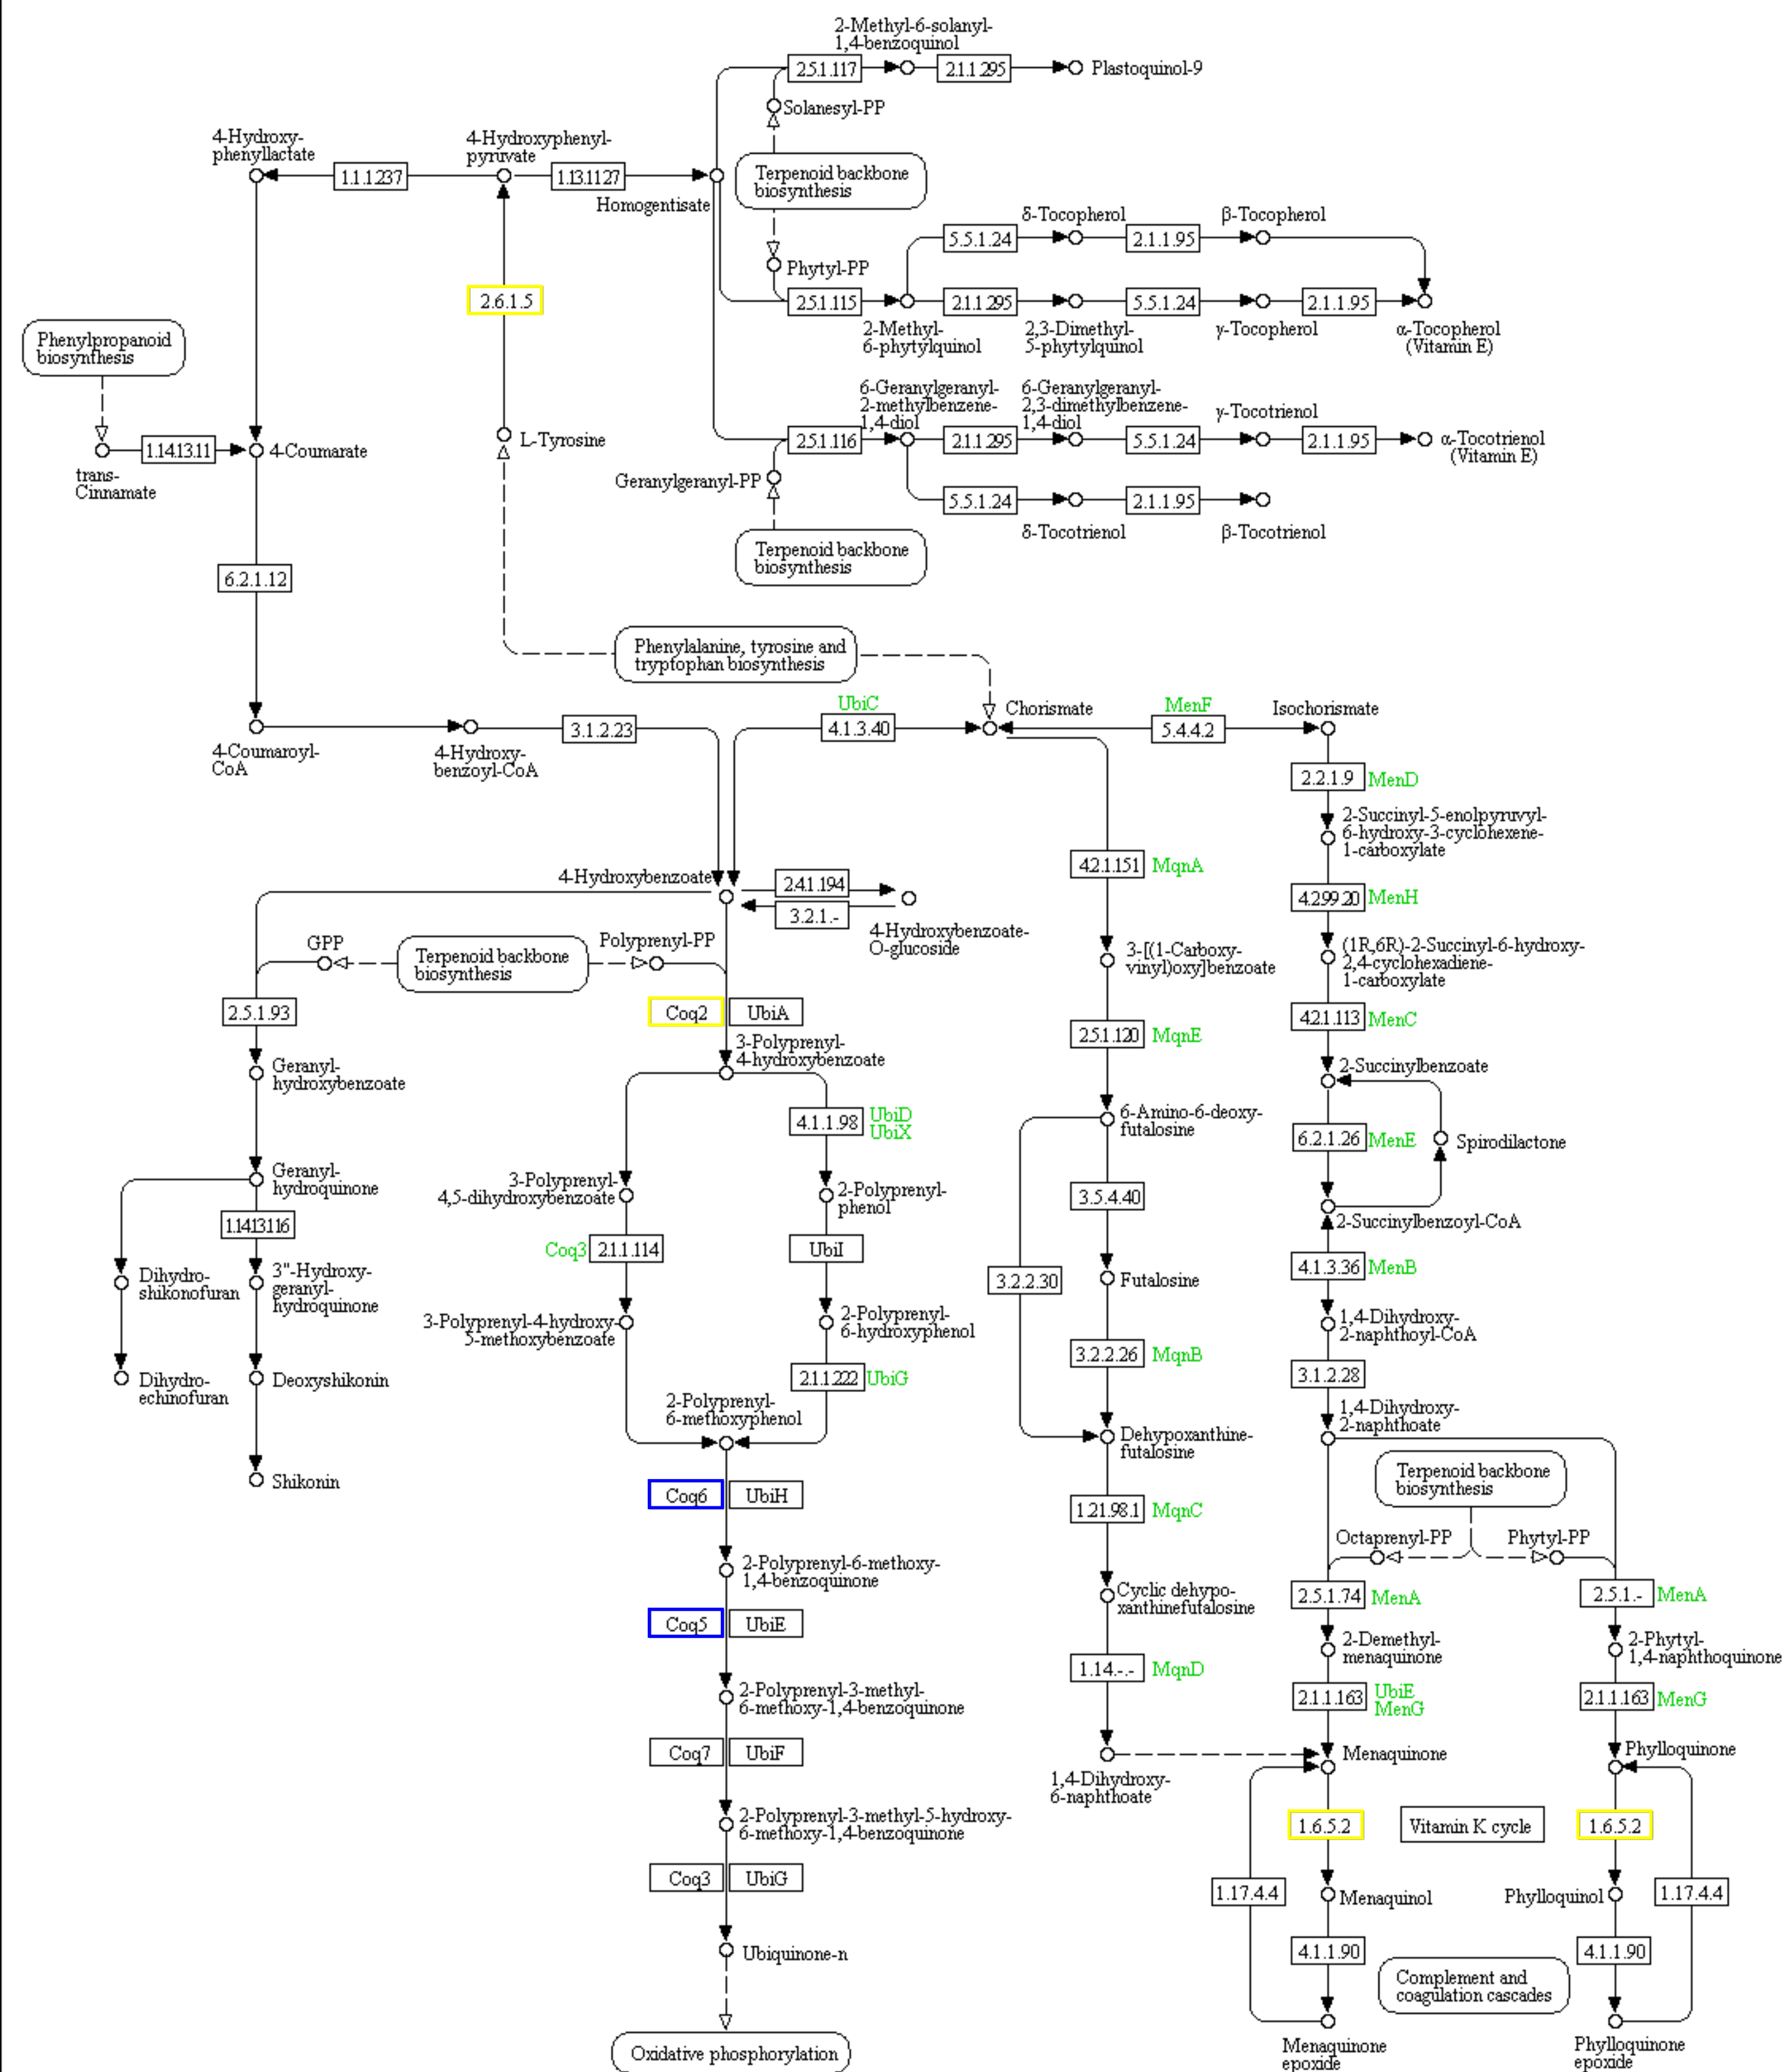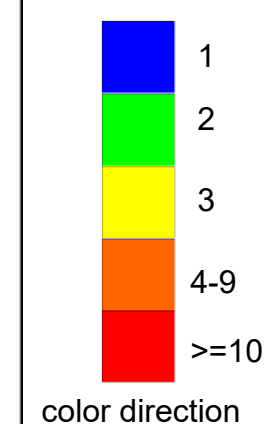

Supplement: s1 [file s1]

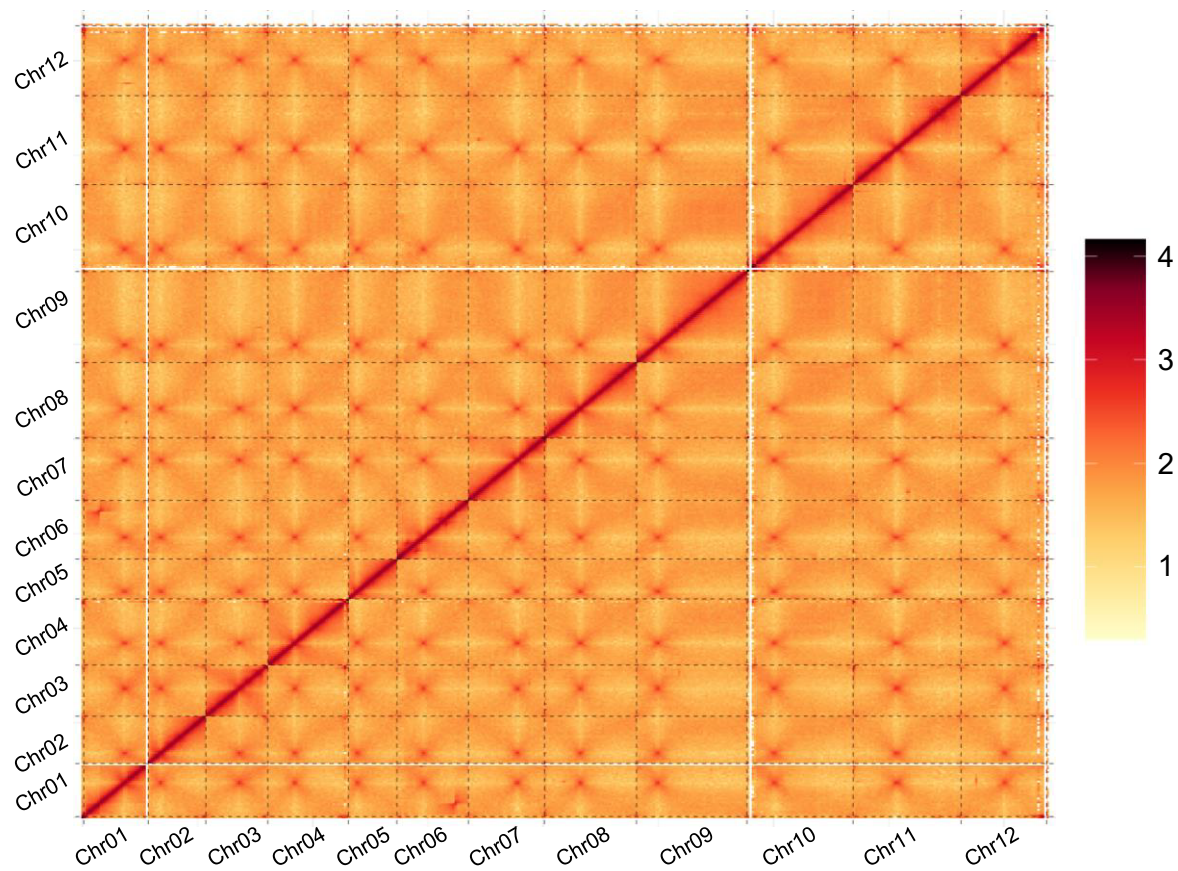

Supplement: s1 [file s1]
